# Supplementary material for: Subtyping colorectal cancer based on septic shock-associated genes: prognosis and immune characteristics
Source: Front Genet. 2024 Nov 15;15:1468424. doi: 10.3389/fgene.2024.1468424 (PMC11604612; doi:10.3389/fgene.2024.1468424)
Supplement: Supplementary file 1 [file Table1.xlsx]

## Sheet: Clinical information of CRC
Supplementary Table 1: Clinical information of TCGA-CRC (READ+COAD).
barcode	patient	sample	shortLetterCode	definition	sample_submitter_id	sample_type_id	tumor_descriptor	sample_id	submitter_id	sample_type	oct_embedded	specimen_type	state	is_ffpe	tissue_type	preservation_method	composition	days_to_collection	initial_weight	intermediate_dimension	pathology_report_uuid	shortest_dimension	longest_dimension	synchronous_malignancy	ajcc_pathologic_stage	days_to_diagnosis	treatments	last_known_disease_status	tissue_or_organ_of_origin	days_to_last_follow_up	age_at_diagnosis	primary_diagnosis	prior_malignancy	year_of_diagnosis	prior_treatment	ajcc_staging_system_edition	ajcc_pathologic_t	morphology	ajcc_pathologic_n	ajcc_pathologic_m	classification_of_tumor	diagnosis_id	icd_10_code	site_of_resection_or_biopsy	tumor_grade	progression_or_recurrence	alcohol_history	exposure_id	race
TCGA-AA-3692-01A-01R-0905-07	TCGA-AA-3692	TCGA-AA-3692-01A	TP	Primary solid Tumor	TCGA-AA-3692-01A	1	Primary	48cbf5b5-bea9-4d31-bc93-6122a329f3ea	TCGA-AA-3692	Primary Tumor	NA	Solid Tissue	released	FALSE	Tumor	Unknown	Not Reported	NA	NA	0.6	f899f217-0d34-4477-8ae3-80640ae34889	0.3	0.6	Not Reported	Stage IV	0	list(treatment_intent_type = c(NA, NA), updated_datetime = c("2019-07-31T18:35:41.616628-05:00", "2019-07-31T18:35:41.616628-05:00"), treatment_id = c("14a9506c-c78a-560d-a3e6-85cb31dd6456", "f2fe8f95-b882-5364-96a6-5b90a2d7f57f"), submitter_id = c("TCGA-AA-3692_treatment", "TCGA-AA-3692_treatment_1"), treatment_type = c("Radiation Therapy, NOS", "Pharmaceutical Therapy, NOS"), state = c("release…	not reported	Colon, NOS	0	17167	Mucinous adenocarcinoma	yes	2008	No	6th	T3	1980-03-01	N2	M1	not reported	9e4cf95d-116c-5584-8fa3-2d02a576f7ab	C18.9	Colon, NOS	Not Reported	not reported	Not Reported	97260745-8a8c-52b5-bb73-59895bfeba52	not reported
TCGA-AA-3662-11A-01R-1723-07	TCGA-AA-3662	TCGA-AA-3662-11A	NT	Solid Tissue Normal	TCGA-AA-3662-11A	11	Not Applicable	ea88380e-ed58-4a4e-bf86-c81af19b4594	TCGA-AA-3662	Solid Tissue Normal	NA	Solid Tissue	released	FALSE	Normal	Unknown	Not Reported	NA	NA	1	NA	0.3	1.1	Not Reported	Stage IV	0	list(days_to_treatment_end = c(NA, NA), days_to_treatment_start = c(NA, NA), treatment_id = c("68112583-82df-551e-8762-9757075f163d", "861dfd71-e5d7-5d02-a848-5f14fed6db94"), submitter_id = c("TCGA-AA-3662_treatment_1", "TCGA-AA-3662_treatment"), treatment_type = c("Pharmaceutical Therapy, NOS", "Radiation Therapy, NOS"), regimen_or_line_of_therapy = c(NA, NA), treatment_effect = c(NA, NA), thera…	not reported	Colon, NOS	184	29554	Adenocarcinoma, NOS	yes	2005	No	5th	T4	1940-03-01	N2	M1	not reported	e3ade95d-c128-5fae-8a6c-3ea820c30c4f	C18.9	Colon, NOS	Not Reported	not reported	Not Reported	607862c4-25f9-5dbd-90e0-93f7ba85e04d	not reported
TCGA-AA-A00L-01A-01R-A002-07	TCGA-AA-A00L	TCGA-AA-A00L-01A	TP	Primary solid Tumor	TCGA-AA-A00L-01A	1	Primary	9fa268c0-9e08-436b-a18b-fa9db1794296	TCGA-AA-A00L	Primary Tumor	FALSE	Solid Tissue	released	FALSE	Tumor	Unknown	Not Reported	326	360	NA	3A6D9A07-C421-4C87-AC68-2A6FC3BFD05D	NA	NA	Not Reported	Stage IIA	0	list(days_to_treatment_end = c(NA, NA), days_to_treatment_start = c(NA, NA), treatment_id = c("3d21ea88-f724-5c96-b0b0-2cdb8aa5e5fb", "6b10dd43-c2ff-5e94-94d4-ad9ad2b40f06"), submitter_id = c("TCGA-AA-A00L_treatment_1", "TCGA-AA-A00L_treatment"), treatment_type = c("Pharmaceutical Therapy, NOS", "Radiation Therapy, NOS"), regimen_or_line_of_therapy = c(NA, NA), treatment_effect = c(NA, NA), thera…	not reported	Transverse colon	1157	24319	Adenocarcinoma, NOS	yes	2009	No	6th	T3	1940-03-01	N0	M0	not reported	62e4b5ec-00cf-578f-9a25-f9d15d6d709f	C18.4	Transverse colon	Not Reported	not reported	Not Reported	88c3198b-6691-5845-bd5c-45d2e97a2039	not reported
TCGA-G4-6625-01A-21R-1774-07	TCGA-G4-6625	TCGA-G4-6625-01A	TP	Primary solid Tumor	TCGA-G4-6625-01A	1	Primary	139cd85f-9a93-421f-8782-78ac917b97e6	TCGA-G4-6625	Primary Tumor	NA	Solid Tissue	released	FALSE	Tumor	Unknown	Not Reported	NA	NA	0.9	02b591ab-281b-45c1-a036-925cdc6cef73	0.4	1.2	Not Reported	Stage IIA	0	list(treatment_intent_type = c(NA, NA), updated_datetime = c("2019-07-31T18:29:21.993895-05:00", "2019-07-31T18:29:21.993895-05:00"), treatment_id = c("c9de9b2a-2852-51bd-b137-446c4d9fe1bd", "e3aa925d-2d16-509c-9147-cc65300ff1b0"), submitter_id = c("TCGA-G4-6625_treatment", "TCGA-G4-6625_treatment_1"), treatment_type = c("Radiation Therapy, NOS", "Pharmaceutical Therapy, NOS"), state = c("release…	not reported	Sigmoid colon	2792	28163	Adenocarcinoma, NOS	yes	2004	No	5th	T3	1940-03-01	N0	M0	not reported	6bf0b827-b7ba-585a-a183-64a964ca7a9f	C18.7	Sigmoid colon	Not Reported	not reported	Not Reported	1f2a2ea5-3646-5b2d-9803-2e4537f0d2cd	white
TCGA-AA-3522-01A-01R-0821-07	TCGA-AA-3522	TCGA-AA-3522-01A	TP	Primary solid Tumor	TCGA-AA-3522-01A	1	Primary	18d3b88c-852a-4782-a6b4-9e6e1a93718d	TCGA-AA-3522	Primary Tumor	NA	Solid Tissue	released	FALSE	Tumor	Unknown	Not Reported	NA	NA	0.6	81ec5d87-9f8f-4608-a15a-f015c73cdfa5	0.3	0.9	Not Reported	Stage IIA	0	list(treatment_intent_type = c(NA, NA), updated_datetime = c("2019-07-31T18:38:14.744288-05:00", "2019-07-31T18:38:14.744288-05:00"), treatment_id = c("2c99bb28-6a7e-5f5f-acaa-32edbd6ddb39", "3598dd59-cccb-53ca-9074-cfb788673192"), submitter_id = c("TCGA-AA-3522_treatment", "TCGA-AA-3522_treatment_1"), treatment_type = c("Radiation Therapy, NOS", "Pharmaceutical Therapy, NOS"), state = c("release…	not reported	Ascending colon	1127	24653	Adenocarcinoma, NOS	yes	2007	No	6th	T3	1940-03-01	N0	M0	not reported	d18fc9ab-3aef-57ac-97d8-3db794c2fc10	C18.2	Ascending colon	Not Reported	not reported	Not Reported	689e4e8a-4578-5e69-a2fb-039a55a620e1	not reported
TCGA-CM-4750-01A-01R-1410-07	TCGA-CM-4750	TCGA-CM-4750-01A	TP	Primary solid Tumor	TCGA-CM-4750-01A	1	Primary	463d4b1e-2068-45dd-9631-fb9c7268fe6c	TCGA-CM-4750	Primary Tumor	NA	Solid Tissue	released	FALSE	Tumor	Unknown	Not Reported	NA	NA	1.6	dfa82fcc-99c6-4f13-b3f1-a14615247e2d	0.4	1.7	No	Stage IIIA	0	list(treatment_intent_type = c(NA, NA), updated_datetime = c("2019-07-31T18:36:40.687422-05:00", "2019-07-31T18:36:40.687422-05:00"), treatment_id = c("2c7e08e6-2ca5-5511-a671-33a86734cddf", "a36cfc93-2090-509b-a463-557f05fcd318"), submitter_id = c("TCGA-CM-4750_treatment", "TCGA-CM-4750_treatment_1"), treatment_type = c("Radiation Therapy, NOS", "Pharmaceutical Therapy, NOS"), state = c("release…	not reported	Rectosigmoid junction	244	12478	Adenocarcinoma, NOS	no	2010	No	NA	T1	1940-03-01	N1b	M0	not reported	b6cdde95-e0d6-5e5b-ac4e-d9ecd9b281c4	C19	Rectosigmoid junction	Not Reported	not reported	Not Reported	b3330cf1-bf50-5782-bff8-55bdd2c03f26	white
TCGA-AA-3554-01A-01R-0826-07	TCGA-AA-3554	TCGA-AA-3554-01A	TP	Primary solid Tumor	TCGA-AA-3554-01A	1	Primary	fa826d89-3485-4d32-8d90-ba4b16c519d5	TCGA-AA-3554	Primary Tumor	NA	Solid Tissue	released	FALSE	Tumor	Unknown	Not Reported	NA	NA	0.8	3769be1d-4a1a-4279-a7e0-f4b828bcddc1	0.4	1	Not Reported	Stage IIA	0	list(treatment_intent_type = c(NA, NA), updated_datetime = c("2019-07-31T18:35:29.542823-05:00", "2019-07-31T18:35:29.542823-05:00"), treatment_id = c("171d47af-b3f6-55d1-89e5-221d5c39ed16", "e24adeb7-a4c6-5482-9d3d-c4b051a1cff5"), submitter_id = c("TCGA-AA-3554_treatment", "TCGA-AA-3554_treatment_1"), treatment_type = c("Radiation Therapy, NOS", "Pharmaceutical Therapy, NOS"), state = c("release…	not reported	Ascending colon	546	22799	Adenocarcinoma, NOS	yes	2008	Yes	6th	T3	1940-03-01	N0	M0	not reported	809e48eb-e413-5032-b2d9-fab505bac342	C18.2	Ascending colon	Not Reported	not reported	Not Reported	9d2f374e-45bc-51ed-91f7-b328fe1eeb4a	not reported
TCGA-AA-3531-11A-01R-A32Z-07	TCGA-AA-3531	TCGA-AA-3531-11A	NT	Solid Tissue Normal	TCGA-AA-3531-11A	11	Not Applicable	a9091e33-8f02-409d-aa87-14559df9492e	TCGA-AA-3531	Solid Tissue Normal	NA	Solid Tissue	released	FALSE	Normal	Unknown	Not Reported	NA	NA	0.6	NA	0.6	0.8	Not Reported	Stage IIA	0	list(treatment_intent_type = c(NA, NA), updated_datetime = c("2019-07-31T18:27:24.480618-05:00", "2019-07-31T18:27:24.480618-05:00"), treatment_id = c("4da4570a-aa40-58fd-8a8a-4f5d6fb562a4", "cfc969c2-2757-5e97-ac1c-760506d41e6f"), submitter_id = c("TCGA-AA-3531_treatment", "TCGA-AA-3531_treatment_1"), treatment_type = c("Radiation Therapy, NOS", "Pharmaceutical Therapy, NOS"), state = c("release…	not reported	Sigmoid colon	1035	27514	Adenocarcinoma, NOS	yes	2007	No	6th	T3	1940-03-01	N0	M0	not reported	129bff50-1598-5a43-883e-e17054d2e3cb	C18.7	Sigmoid colon	Not Reported	not reported	Not Reported	1cbeedc9-e2ea-55ce-8a68-9b2fc009c317	not reported
TCGA-AA-3561-01A-01R-0821-07	TCGA-AA-3561	TCGA-AA-3561-01A	TP	Primary solid Tumor	TCGA-AA-3561-01A	1	Primary	5e797e09-26d0-42f4-838f-3b05e489e6ec	TCGA-AA-3561	Primary Tumor	NA	Solid Tissue	released	FALSE	Tumor	Unknown	Not Reported	NA	NA	0.6	6f8b8558-c90f-45fa-9a89-6f35b3c118a8	0.5	1.1	No	Stage IIA	0	list(days_to_treatment_end = c(NA, NA), days_to_treatment_start = c(NA, NA), treatment_id = c("373fe496-9007-59b7-bc09-b0ae0eb512b5", "4e687d5b-f5ad-5af9-ae0f-488c1ae75686"), submitter_id = c("TCGA-AA-3561_treatment_1", "TCGA-AA-3561_treatment"), treatment_type = c("Pharmaceutical Therapy, NOS", "Radiation Therapy, NOS"), regimen_or_line_of_therapy = c(NA, NA), treatment_effect = c(NA, NA), thera…	not reported	Colon, NOS	424	26420	Adenocarcinoma, NOS	no	2009	No	6th	T3	1940-03-01	N0	M0	not reported	e959a688-d3ff-5c8f-93fb-bd3d180b8178	C18.9	Colon, NOS	Not Reported	not reported	Not Reported	90596be3-bf9e-5f31-a69e-8bb6fe889a1d	not reported
TCGA-G4-6307-01A-11R-1723-07	TCGA-G4-6307	TCGA-G4-6307-01A	TP	Primary solid Tumor	TCGA-G4-6307-01A	1	Primary	801b8d05-2d29-4f8c-8d8d-634b2e21b867	TCGA-G4-6307	Primary Tumor	NA	Solid Tissue	released	FALSE	Tumor	Unknown	Not Reported	NA	NA	1	fd16f984-2f04-487b-a553-90194c790ff2	0.5	1.5	No	Stage IIIB	0	list(treatment_intent_type = c(NA, NA), updated_datetime = c("2019-07-31T18:28:41.320756-05:00", "2019-07-31T18:28:41.320756-05:00"), treatment_id = c("0d639c64-bb66-5ef3-96b1-29afb95b258f", "8420a802-696e-5e21-954c-d38f287c2e6e"), submitter_id = c("TCGA-G4-6307_treatment", "TCGA-G4-6307_treatment_1"), treatment_type = c("Radiation Therapy, NOS", "Pharmaceutical Therapy, NOS"), state = c("release…	not reported	Sigmoid colon	1674	13648	Adenocarcinoma, NOS	no	2007	No	2nd	T3	1940-03-01	N1	M0	not reported	956357f2-9c5f-5c6d-9371-5b6c7a0198d2	C18.7	Sigmoid colon	Not Reported	not reported	Not Reported	f6ce3857-214a-5e22-a3ea-067a1aa4db04	white
TCGA-A6-6781-01A-22R-A278-07	TCGA-A6-6781	TCGA-A6-6781-01A	TP	Primary solid Tumor	TCGA-A6-6781-01A	1	Primary	f1b2ca40-f20a-42de-aba2-4f730d7ccc09	TCGA-A6-6781	Primary Tumor	NA	Solid Tissue	released	FALSE	Tumor	Unknown	Not Reported	NA	NA	1	b3270a65-315c-422b-9441-00694a674d9d	0.8	1.6	No	Stage IIIC	0	list(days_to_treatment_end = c(NA, NA), days_to_treatment_start = c(NA, NA), treatment_id = c("8bc73d6d-53bd-55d4-a23a-06bee6ab8729", "e247fab9-117b-55c7-a288-b8ee530e48e9"), submitter_id = c("TCGA-A6-6781_treatment_1", "TCGA-A6-6781_treatment"), treatment_type = c("Pharmaceutical Therapy, NOS", "Radiation Therapy, NOS"), regimen_or_line_of_therapy = c(NA, NA), treatment_effect = c(NA, NA), thera…	not reported	Colon, NOS	598	15842	Mucinous adenocarcinoma	no	2011	No	7th	T4b	1980-03-01	N1b	MX	not reported	66bbece6-f950-5d19-8a18-4ed49f8cbe55	C18.9	Colon, NOS	Not Reported	not reported	Not Reported	5500c057-c73a-5896-9637-23be446cd794	white
TCGA-AY-A8YK-01A-11R-A41B-07	TCGA-AY-A8YK	TCGA-AY-A8YK-01A	TP	Primary solid Tumor	TCGA-AY-A8YK-01A	1	Primary	5f6cb74f-1d92-4ea4-92e1-ed23f83649fe	TCGA-AY-A8YK	Primary Tumor	FALSE	Solid Tissue	released	FALSE	Tumor	Unknown	Not Reported	138	480	NA	22C33C79-0791-40C1-A97C-F1C1AD76063E	NA	NA	No	Stage IVA	0	list(treatment_intent_type = c(NA, NA), updated_datetime = c("2019-07-31T15:23:05.133316-05:00", "2019-07-31T15:23:05.133316-05:00"), treatment_id = c("90f524bb-2c93-5b70-843f-223b3ba30dd8", "e468b2fd-24d5-5f5c-beec-f91f08247cac"), submitter_id = c("TCGA-AY-A8YK_treatment", "TCGA-AY-A8YK_treatment_1"), treatment_type = c("Radiation Therapy, NOS", "Pharmaceutical Therapy, NOS"), state = c("release…	not reported	Sigmoid colon	573	16140	Adenocarcinoma, NOS	no	2013	No	7th	T3	1940-03-01	N2a	M1	not reported	176ddfa0-7423-514e-84e9-7b626b4fe654	C18.7	Sigmoid colon	Not Reported	not reported	Not Reported	95e4484b-e701-5b1b-a207-a9bddf85c024	black or african american
TCGA-F4-6703-01A-11R-1839-07	TCGA-F4-6703	TCGA-F4-6703-01A	TP	Primary solid Tumor	TCGA-F4-6703-01A	1	Primary	04dd54d3-e4d1-4c72-860b-20e971609a5a	TCGA-F4-6703	Primary Tumor	NA	Solid Tissue	released	FALSE	Tumor	Unknown	Not Reported	NA	NA	1.3	227ed987-c3d7-420f-9276-2f803646323b	0.5	2.2	No	Stage IIA	0	list(treatment_intent_type = c(NA, NA), updated_datetime = c("2019-07-31T18:23:07.149973-05:00", "2019-07-31T18:23:07.149973-05:00"), treatment_id = c("91b3ffe4-f5eb-5382-aaf1-fa16c9e3837f", "ca9c566a-10ea-57dc-ab8b-e9f0fc7a9a00"), submitter_id = c("TCGA-F4-6703_treatment", "TCGA-F4-6703_treatment_1"), treatment_type = c("Radiation Therapy, NOS", "Pharmaceutical Therapy, NOS"), state = c("release…	not reported	Ascending colon	1456	23644	Adenocarcinoma, NOS	no	2011	No	7th	T3	1940-03-01	N0	M0	not reported	1aca2030-9e94-5d48-b5bf-aa12513a715f	C18.2	Ascending colon	Not Reported	not reported	Not Reported	a76465b6-faad-5407-b64f-3de904eca187	white
TCGA-AD-6965-01A-11R-1928-07	TCGA-AD-6965	TCGA-AD-6965-01A	TP	Primary solid Tumor	TCGA-AD-6965-01A	1	Primary	96319b52-d5b9-44bf-9a98-2876d911988f	TCGA-AD-6965	Primary Tumor	NA	Solid Tissue	released	FALSE	Tumor	Unknown	Not Reported	NA	NA	0.7	af7b6e8c-cce1-4d7e-884c-5475d6182eb2	0.3	0.9	No	Stage IIIC	0	list(days_to_treatment_end = c(NA, NA), days_to_treatment_start = c(NA, NA), treatment_id = c("c1476844-f207-5716-a44f-2478bef906e6", "f4fbd912-1389-559e-b4d9-fbdfffa3f4b9"), submitter_id = c("TCGA-AD-6965_treatment_1", "TCGA-AD-6965_treatment"), treatment_type = c("Pharmaceutical Therapy, NOS", "Radiation Therapy, NOS"), regimen_or_line_of_therapy = c(NA, NA), treatment_effect = c(NA, NA), thera…	not reported	Cecum	805	22853	Adenocarcinoma, NOS	no	2011	No	7th	T4a	1940-03-01	N2b	M0	not reported	aea31f5f-ca23-5540-b9e4-ab1600d78411	C18.0	Cecum	Not Reported	not reported	Not Reported	4b4822ab-f14c-5d9d-bf1d-e001372927d0	white
TCGA-A6-6781-01B-06R-A277-07	TCGA-A6-6781	TCGA-A6-6781-01B	TP	Primary solid Tumor	TCGA-A6-6781-01B	1	Primary	c3ca213a-1389-4e6b-8fbf-63479be7402a	TCGA-A6-6781	Primary Tumor	FALSE	Solid Tissue	released	TRUE	Tumor	FFPE	Not Reported	249	NA	NA	b3270a65-315c-422b-9441-00694a674d9d	NA	NA	No	Stage IIIC	0	list(days_to_treatment_end = c(NA, NA), days_to_treatment_start = c(NA, NA), treatment_id = c("8bc73d6d-53bd-55d4-a23a-06bee6ab8729", "e247fab9-117b-55c7-a288-b8ee530e48e9"), submitter_id = c("TCGA-A6-6781_treatment_1", "TCGA-A6-6781_treatment"), treatment_type = c("Pharmaceutical Therapy, NOS", "Radiation Therapy, NOS"), regimen_or_line_of_therapy = c(NA, NA), treatment_effect = c(NA, NA), thera…	not reported	Colon, NOS	598	15842	Mucinous adenocarcinoma	no	2011	No	7th	T4b	1980-03-01	N1b	MX	not reported	66bbece6-f950-5d19-8a18-4ed49f8cbe55	C18.9	Colon, NOS	Not Reported	not reported	Not Reported	5500c057-c73a-5896-9637-23be446cd794	white
TCGA-AA-A029-01A-01R-A00A-07	TCGA-AA-A029	TCGA-AA-A029-01A	TP	Primary solid Tumor	TCGA-AA-A029-01A	1	Primary	35aad6ca-2675-42b3-8847-e83f7f840c2b	TCGA-AA-A029	Primary Tumor	FALSE	Solid Tissue	released	FALSE	Tumor	Unknown	Not Reported	1493	500	NA	132B76AD-5B42-4315-B96D-BD4D6BB1F33C	NA	NA	No	Stage II	0	list(days_to_treatment_end = c(NA, NA), days_to_treatment_start = c(NA, NA), treatment_id = c("3082d0b4-f45f-523f-b928-d6d9f48bedd5", "96bc55e8-061f-52be-85a9-1b61103a58ac"), submitter_id = c("TCGA-AA-A029_treatment_1", "TCGA-AA-A029_treatment"), treatment_type = c("Pharmaceutical Therapy, NOS", "Radiation Therapy, NOS"), regimen_or_line_of_therapy = c(NA, NA), treatment_effect = c(NA, NA), thera…	not reported	Cecum	1581	24686	Adenocarcinoma, NOS	no	2006	No	5th	T3	1940-03-01	N0	M0	not reported	8e260862-c849-5921-ba6b-0d5091be3e51	C18.0	Cecum	Not Reported	not reported	Not Reported	118fd954-7233-5dc9-be7f-4887751b7ca3	not reported
TCGA-AA-3510-01A-01R-1410-07	TCGA-AA-3510	TCGA-AA-3510-01A	TP	Primary solid Tumor	TCGA-AA-3510-01A	1	Primary	c71c031c-3089-44e5-a49f-5284d7d300ce	TCGA-AA-3510	Primary Tumor	NA	Solid Tissue	released	FALSE	Tumor	Unknown	Not Reported	NA	NA	0.9	67cd8ff2-31ea-40fb-9e5d-c4dc4d0e7ca1	0.3	1.4	No	Stage II	0	list(treatment_intent_type = c(NA, NA), updated_datetime = c("2019-07-31T18:26:39.827708-05:00", "2019-07-31T18:26:39.827708-05:00"), treatment_id = c("3391d1fe-afbb-5179-a97c-2f09edd9676c", "a7825dd2-104a-54e0-a016-448d903dd99d"), submitter_id = c("TCGA-AA-3510_treatment", "TCGA-AA-3510_treatment_1"), treatment_type = c("Radiation Therapy, NOS", "Pharmaceutical Therapy, NOS"), state = c("release…	not reported	Colon, NOS	1946	25902	Adenocarcinoma, NOS	no	2005	No	5th	T3	1940-03-01	N0	M0	not reported	399e6de9-aaff-503e-b3bd-d6514cc82375	C18.2	Colon, NOS	Not Reported	not reported	Not Reported	1d42ec6c-b158-54da-8622-1b180cbf8d4c	not reported
TCGA-AY-A71X-01A-12R-A37K-07	TCGA-AY-A71X	TCGA-AY-A71X-01A	TP	Primary solid Tumor	TCGA-AY-A71X-01A	1	Primary	4c09ff32-902b-4d36-bdf7-f4d3399c059f	TCGA-AY-A71X	Primary Tumor	FALSE	Solid Tissue	released	FALSE	Tumor	Unknown	Not Reported	95	400	NA	32360E38-C269-487F-806F-A3880DE9F3EC	NA	NA	No	Stage I	0	list(days_to_treatment_end = c(NA, NA), days_to_treatment_start = c(NA, NA), treatment_id = c("134c0f37-cec6-534a-87b0-3464e58feae2", "2e710eac-f8cf-5cd2-acf4-6fdfc694019e"), submitter_id = c("TCGA-AY-A71X_treatment_1", "TCGA-AY-A71X_treatment"), treatment_type = c("Pharmaceutical Therapy, NOS", "Radiation Therapy, NOS"), regimen_or_line_of_therapy = c(NA, NA), treatment_effect = c(NA, NA), thera…	not reported	Cecum	588	19904	Adenocarcinoma, NOS	no	2013	No	7th	T2	1940-03-01	N0	M0	not reported	928c2749-43db-567e-82e1-d2a27b40fefd	C18.0	Cecum	Not Reported	not reported	Not Reported	3f3fec87-4891-56db-8abc-957fe430e31b	black or african american
TCGA-AZ-6603-11A-02R-1839-07	TCGA-AZ-6603	TCGA-AZ-6603-11A	NT	Solid Tissue Normal	TCGA-AZ-6603-11A	11	Not Applicable	e5c26212-ccfc-40cf-a38f-c0c2d78a2036	TCGA-AZ-6603	Solid Tissue Normal	NA	Solid Tissue	released	FALSE	Normal	Unknown	Not Reported	NA	NA	1.5	NA	0.1	2	No	NA	0	list(treatment_intent_type = c(NA, NA), updated_datetime = c("2019-07-31T18:28:46.919389-05:00", "2019-07-31T18:28:46.919389-05:00"), treatment_id = c("2231d0c0-3523-5c46-bb00-3f76ae0ed452", "8248c85b-802c-52f4-aced-2a8ef1f17fb0"), submitter_id = c("TCGA-AZ-6603_treatment", "TCGA-AZ-6603_treatment_1"), treatment_type = c("Radiation Therapy, NOS", "Pharmaceutical Therapy, NOS"), state = c("release…	not reported	Sigmoid colon	NA	28424	Adenocarcinoma, NOS	no	2002	No	5th	T2	1940-03-01	N1	MX	not reported	868f5395-7661-5049-b831-fd03c273451b	C18.7	Sigmoid colon	Not Reported	not reported	Not Reported	b269b229-816b-5a65-96dc-1746a0f92c2a	white
TCGA-CM-5341-01A-01R-1410-07	TCGA-CM-5341	TCGA-CM-5341-01A	TP	Primary solid Tumor	TCGA-CM-5341-01A	1	Primary	2575e283-a731-45c4-ac86-e6f927c204e7	TCGA-CM-5341	Primary Tumor	NA	Solid Tissue	released	FALSE	Tumor	Unknown	Not Reported	NA	NA	1.8	bd882c39-2d27-41a6-9a89-4482d92ed68b	0.5	2	No	Stage IIIA	0	list(days_to_treatment_end = c(NA, NA), days_to_treatment_start = c(NA, NA), treatment_id = c("08a16a6f-e883-5d3e-90bb-cb26fdd0256d", "3e4739f3-7830-54b7-a820-2864d25dc5ec"), submitter_id = c("TCGA-CM-5341_treatment_1", "TCGA-CM-5341_treatment"), treatment_type = c("Pharmaceutical Therapy, NOS", "Radiation Therapy, NOS"), regimen_or_line_of_therapy = c(NA, NA), treatment_effect = c(NA, NA), thera…	not reported	Sigmoid colon	884	30163	Adenocarcinoma, NOS	no	2010	No	NA	T2	1940-03-01	N1a	M0	not reported	7722d2df-9bfe-5453-95e4-32882e64486a	C18.7	Sigmoid colon	Not Reported	not reported	Not Reported	cba0f429-333b-5606-92fa-3adeea477643	white
TCGA-AZ-6599-11A-01R-1774-07	TCGA-AZ-6599	TCGA-AZ-6599-11A	NT	Solid Tissue Normal	TCGA-AZ-6599-11A	11	Not Applicable	807b3096-9816-41ac-8fdc-dcf12ba5b4cd	TCGA-AZ-6599	Solid Tissue Normal	NA	Solid Tissue	released	FALSE	Normal	Unknown	Not Reported	NA	NA	1.5	NA	0.8	1.5	No	Stage I	0	list(treatment_intent_type = c(NA, NA), updated_datetime = c("2019-07-31T18:41:05.832319-05:00", "2019-07-31T18:41:05.832319-05:00"), treatment_id = c("71b2155f-0e03-53a3-82d7-145d4cb28690", "b00d73a9-1f10-50e4-ad87-12049b4ea591"), submitter_id = c("TCGA-AZ-6599_treatment", "TCGA-AZ-6599_treatment_1"), treatment_type = c("Radiation Therapy, NOS", "Pharmaceutical Therapy, NOS"), state = c("release…	not reported	Cecum	NA	26438	Adenocarcinoma, NOS	no	2001	No	5th	T2	1940-03-01	N0	MX	not reported	b1b1cb67-2f2b-5837-a098-557a6d0309ee	C18.0	Cecum	Not Reported	not reported	Not Reported	5f227622-cd7e-53f0-9d08-92e1a2047033	white
TCGA-F4-6809-01A-11R-1839-07	TCGA-F4-6809	TCGA-F4-6809-01A	TP	Primary solid Tumor	TCGA-F4-6809-01A	1	Primary	1aba77ba-8c2c-4060-83e8-fb3bdd2270aa	TCGA-F4-6809	Primary Tumor	NA	Solid Tissue	released	FALSE	Tumor	Unknown	Not Reported	NA	NA	2	3eef31f7-8c59-4b40-b441-daae9cb87c92	0.7	2.6	No	Stage IVA	0	list(treatment_intent_type = c(NA, NA), updated_datetime = c("2019-07-31T18:42:58.720297-05:00", "2019-07-31T18:42:58.720297-05:00"), treatment_id = c("df517a46-15b5-5f51-9656-7e83a2902563", "e2b5b67b-dfbc-55fb-bf24-554860278059"), submitter_id = c("TCGA-F4-6809_treatment", "TCGA-F4-6809_treatment_1"), treatment_type = c("Radiation Therapy, NOS", "Pharmaceutical Therapy, NOS"), state = c("release…	not reported	Sigmoid colon	39	19039	Adenocarcinoma, NOS	no	2011	No	7th	T3	1940-03-01	N1	M1	not reported	149225df-1b96-52a4-b4ee-e7eb85670261	C18.7	Sigmoid colon	Not Reported	not reported	Not Reported	2b6cad04-01e3-52cd-9d43-aebae171eb25	white
TCGA-A6-2678-01A-01R-0821-07	TCGA-A6-2678	TCGA-A6-2678-01A	TP	Primary solid Tumor	TCGA-A6-2678-01A	1	Primary	20eccd8a-dfaf-40e4-8128-d77aa41680c4	TCGA-A6-2678	Primary Tumor	NA	Solid Tissue	released	FALSE	Tumor	Unknown	Not Reported	NA	NA	0.4	4c0861d1-a3b9-45cf-b0ac-ee9adb748e55	0.3	1.3	No	Stage IIIB	0	list(treatment_intent_type = c(NA, NA), updated_datetime = c("2019-07-31T18:27:04.051557-05:00", "2019-07-31T18:27:04.051557-05:00"), treatment_id = c("52d132c9-7e01-5882-93a4-8e36d3809ef0", "886c4b6f-8404-5d08-b8f1-f45735168533"), submitter_id = c("TCGA-A6-2678_treatment", "TCGA-A6-2678_treatment_1"), treatment_type = c("Radiation Therapy, NOS", "Pharmaceutical Therapy, NOS"), state = c("release…	not reported	Transverse colon	1286	16030	Adenocarcinoma, NOS	no	2009	No	6th	T3	1940-03-01	N1	M0	not reported	ccbdd2e1-7c04-5f88-a535-3883a1558658	C18.4	Transverse colon	Not Reported	not reported	Not Reported	f7f290b8-7aa4-53d0-9e29-b60237b3f9a4	white
TCGA-A6-6653-01A-11R-1774-07	TCGA-A6-6653	TCGA-A6-6653-01A	TP	Primary solid Tumor	TCGA-A6-6653-01A	1	Primary	bfdf24b7-f635-414f-8ba4-5eb58c8c4577	TCGA-A6-6653	Primary Tumor	NA	Solid Tissue	released	FALSE	Tumor	Unknown	Not Reported	NA	NA	0.6	8360924d-ce15-4713-82d3-f8f8932b1dfb	0.4	0.7	No	Stage I	0	list(treatment_intent_type = c(NA, NA), updated_datetime = c("2019-07-31T18:30:06.770749-05:00", "2019-07-31T18:30:06.770749-05:00"), treatment_id = c("b1bc89be-c3f4-57ee-9fd1-db287fcaf39f", "dc70a6e0-f82d-5189-b928-92dab785a50f"), submitter_id = c("TCGA-A6-6653_treatment", "TCGA-A6-6653_treatment_1"), treatment_type = c("Radiation Therapy, NOS", "Pharmaceutical Therapy, NOS"), state = c("release…	not reported	Colon, NOS	742	29996	Adenocarcinoma, NOS	no	2011	No	7th	T2	1940-03-01	N0	M0	not reported	d2e67fea-1535-5854-a5e3-1a9ef88e8bed	C18.9	Colon, NOS	Not Reported	not reported	Not Reported	eb592b47-db3b-5d2c-9211-425a17e57682	white
TCGA-A6-6648-01A-11R-1774-07	TCGA-A6-6648	TCGA-A6-6648-01A	TP	Primary solid Tumor	TCGA-A6-6648-01A	1	Primary	a111b68c-b45c-4cfc-9733-9dd140e81419	TCGA-A6-6648	Primary Tumor	NA	Solid Tissue	released	FALSE	Tumor	Unknown	Not Reported	NA	NA	0.9	432dec4f-b217-44bf-a559-1559fdceb7ba	0.5	1.9	No	Stage IVA	0	list(days_to_treatment_end = c(NA, NA), days_to_treatment_start = c(NA, NA), treatment_id = c("a488332e-7766-5795-a775-ae7e8d3f6f9d", "d0c291ec-1b69-5700-84b5-dda46e764343"), submitter_id = c("TCGA-A6-6648_treatment_1", "TCGA-A6-6648_treatment"), treatment_type = c("Pharmaceutical Therapy, NOS", "Radiation Therapy, NOS"), regimen_or_line_of_therapy = c(NA, NA), treatment_effect = c(NA, NA), thera…	not reported	Descending colon	766	20641	Adenocarcinoma, NOS	no	2010	No	7th	T3	1940-03-01	N0	M1a	not reported	1696af00-6799-5195-b7c3-c4d387ffb446	C18.6	Descending colon	Not Reported	not reported	Not Reported	596bffe5-1595-5026-8fe7-377b43f663f1	white
TCGA-F4-6570-01A-11R-1774-07	TCGA-F4-6570	TCGA-F4-6570-01A	TP	Primary solid Tumor	TCGA-F4-6570-01A	1	Primary	22b0fa6d-cad9-4937-b1f6-387fc7a6614d	TCGA-F4-6570	Primary Tumor	NA	Solid Tissue	released	FALSE	Tumor	Unknown	Not Reported	NA	NA	2	2db5fc84-1782-4c79-9179-11988dd8ba01	0.4	2.8	No	Stage IIA	0	list(days_to_treatment_end = c(NA, NA), days_to_treatment_start = c(NA, NA), treatment_id = c("0616a60d-80e6-51a1-9069-6fb149b1223d", "97e2e8e8-5895-5fa8-9484-0c000dc98f1a"), submitter_id = c("TCGA-F4-6570_treatment_1", "TCGA-F4-6570_treatment"), treatment_type = c("Pharmaceutical Therapy, NOS", "Radiation Therapy, NOS"), regimen_or_line_of_therapy = c(NA, NA), treatment_effect = c(NA, NA), thera…	not reported	Colon, NOS	0	28772	Adenocarcinoma, NOS	no	2011	No	7th	T3	1940-03-01	N0	M0	not reported	153a8ff7-0401-556e-b598-af8cd120f18f	C18.9	Colon, NOS	Not Reported	not reported	Not Reported	2ae33a17-858a-5669-a0e1-55cf65f093f4	white
TCGA-CK-4952-01A-01R-1723-07	TCGA-CK-4952	TCGA-CK-4952-01A	TP	Primary solid Tumor	TCGA-CK-4952-01A	1	Primary	88b3045c-bb2e-4ad6-adbb-b52fabb7b917	TCGA-CK-4952	Primary Tumor	NA	Solid Tissue	released	FALSE	Tumor	Unknown	Not Reported	NA	NA	0.4	0086611e-c16d-4934-804e-332f4d0daad1	0.1	1	No	Stage IIIC	0	list(days_to_treatment_end = c(NA, NA), days_to_treatment_start = c(NA, NA), treatment_id = c("498db4c7-6688-5b58-9535-1a8abea59431", "4b7d56e5-9568-5504-88a7-030789866643"), submitter_id = c("TCGA-CK-4952_treatment_1", "TCGA-CK-4952_treatment"), treatment_type = c("Pharmaceutical Therapy, NOS", "Radiation Therapy, NOS"), regimen_or_line_of_therapy = c(NA, NA), treatment_effect = c(NA, NA), thera…	not reported	Ascending colon	475	17826	Mucinous adenocarcinoma	no	2007	No	6th	T4	1980-03-01	N2	M0	not reported	158b2d77-e651-5c89-9842-7ead7df77e0b	C18.2	Ascending colon	Not Reported	not reported	Not Reported	5b3759be-dd35-570e-9e74-917b54624f18	white
TCGA-AA-A01X-01A-21R-A083-07	TCGA-AA-A01X	TCGA-AA-A01X-01A	TP	Primary solid Tumor	TCGA-AA-A01X-01A	1	Primary	0225a318-9bb2-4340-a34a-99fcbc563e0a	TCGA-AA-A01X	Primary Tumor	FALSE	Solid Tissue	released	FALSE	Tumor	Unknown	Not Reported	1907	530	NA	1FD84A23-A23D-465B-9D2D-83928659BA60	NA	NA	No	Stage III	0	list(treatment_intent_type = c(NA, NA), updated_datetime = c("2019-07-31T15:55:29.238110-05:00", "2019-07-31T15:55:29.238110-05:00"), treatment_id = c("3292e079-821f-5e57-92a7-5d062188dec4", "d8b29d83-9b42-519d-a834-d5e656315ebb"), submitter_id = c("TCGA-AA-A01X_treatment", "TCGA-AA-A01X_treatment_1"), treatment_type = c("Radiation Therapy, NOS", "Pharmaceutical Therapy, NOS"), state = c("release…	not reported	Sigmoid colon	791	29281	Adenocarcinoma, NOS	no	2004	No	5th	T2	1940-03-01	N1	M0	not reported	c5b042a8-e7b0-5c31-86ad-f2cd4a7b3202	C18.7	Sigmoid colon	Not Reported	not reported	Not Reported	6a2a49c7-e462-5b3f-b662-7aa46f98bbcf	not reported
TCGA-A6-2681-01A-01R-1410-07	TCGA-A6-2681	TCGA-A6-2681-01A	TP	Primary solid Tumor	TCGA-A6-2681-01A	1	Primary	0537bad8-0e85-4b05-91b3-fd965e96d0d7	TCGA-A6-2681	Primary Tumor	NA	Solid Tissue	released	FALSE	Tumor	Unknown	Not Reported	NA	NA	0.6	ec4bb62b-edf5-4051-8240-4e9d89fd928f	0.3	1.4	Not Reported	Stage IIA	0	list(days_to_treatment_end = c(NA, NA), days_to_treatment_start = c(NA, NA), treatment_id = c("25613f32-f960-52e1-ace5-9c6bc5e33a8d", "3fda2555-04f3-5bc8-924e-359c19720345"), submitter_id = c("TCGA-A6-2681_treatment_1", "TCGA-A6-2681_treatment"), treatment_type = c("Pharmaceutical Therapy, NOS", "Radiation Therapy, NOS"), regimen_or_line_of_therapy = c(NA, NA), treatment_effect = c(NA, NA), thera…	not reported	Colon, NOS	1387	26929	Adenocarcinoma, NOS	yes	2009	No	6th	T3	1940-03-01	N0	M0	not reported	36ba4fb9-a407-5361-a1c1-6d00a62a867a	C18.9	Colon, NOS	Not Reported	not reported	Not Reported	73e7fd0e-fcbc-50ec-8d54-3ba49113b527	white
TCGA-CM-6170-01A-11R-1653-07	TCGA-CM-6170	TCGA-CM-6170-01A	TP	Primary solid Tumor	TCGA-CM-6170-01A	1	Primary	8ec9edae-7252-46c0-ada6-0d7998677aca	TCGA-CM-6170	Primary Tumor	NA	Solid Tissue	released	FALSE	Tumor	Unknown	Not Reported	NA	NA	0.9	319e200a-d0c5-47b3-9432-1eb1404233fa	0.4	1.2	No	Stage I	0	list(treatment_intent_type = c(NA, NA), updated_datetime = c("2019-07-31T18:33:26.036329-05:00", "2019-07-31T18:33:26.036329-05:00"), treatment_id = c("2fe16006-63fe-5e6f-af9d-4b07f6a133b4", "c8c126bc-7399-53a1-9a0e-c48fd1b8e44b"), submitter_id = c("TCGA-CM-6170_treatment", "TCGA-CM-6170_treatment_1"), treatment_type = c("Radiation Therapy, NOS", "Pharmaceutical Therapy, NOS"), state = c("release…	not reported	Descending colon	457	26663	Adenocarcinoma, NOS	no	2010	No	7th	T2	1940-03-01	N0	M0	not reported	8ee5348d-d087-576b-8f53-79661e4d812a	C18.6	Descending colon	Not Reported	not reported	Not Reported	eb111e3a-e97c-53d9-9909-a62d77409a00	white
TCGA-CM-5349-01A-21R-1723-07	TCGA-CM-5349	TCGA-CM-5349-01A	TP	Primary solid Tumor	TCGA-CM-5349-01A	1	Primary	59a3ebb6-0bc0-4790-99bf-3caf74cb5c6e	TCGA-CM-5349	Primary Tumor	NA	Solid Tissue	released	FALSE	Tumor	Unknown	Not Reported	NA	NA	1	f4491d68-ec4b-45d7-bab8-cf4ed1ffaf62	0.4	2	No	Stage IIA	0	list(treatment_intent_type = c(NA, NA), updated_datetime = c("2019-07-31T18:24:56.400495-05:00", "2019-07-31T18:24:56.400495-05:00"), treatment_id = c("58c33e23-aec3-5d36-aee9-410f93b95ef3", "86e60908-dab9-5a59-a042-79072913b77a"), submitter_id = c("TCGA-CM-5349_treatment", "TCGA-CM-5349_treatment_1"), treatment_type = c("Radiation Therapy, NOS", "Pharmaceutical Therapy, NOS"), state = c("release…	not reported	Cecum	915	24867	Adenocarcinoma, NOS	no	2010	No	7th	T3	1940-03-01	N0	M0	not reported	7b2e84ea-4f86-54a5-b17d-591de0310179	C18.0	Cecum	Not Reported	not reported	Not Reported	d49f1758-253f-53e3-9d39-88aef33999df	white
TCGA-AA-3821-01A-01R-1022-07	TCGA-AA-3821	TCGA-AA-3821-01A	TP	Primary solid Tumor	TCGA-AA-3821-01A	1	Primary	6ab79ec9-2416-41ef-b2c4-49850a5ddf34	TCGA-AA-3821	Primary Tumor	NA	Solid Tissue	released	FALSE	Tumor	Unknown	Not Reported	NA	NA	0.5	f65818ac-707f-432e-b5f5-0be1405074e3	0.5	0.5	No	Stage I	0	list(days_to_treatment_end = c(NA, NA), days_to_treatment_start = c(NA, NA), treatment_id = c("077e75ef-3768-519d-a329-7dad5dc5b747", "9eb834d3-d9c0-5ecd-b16d-b719adbb902e"), submitter_id = c("TCGA-AA-3821_treatment_1", "TCGA-AA-3821_treatment"), treatment_type = c("Pharmaceutical Therapy, NOS", "Radiation Therapy, NOS"), regimen_or_line_of_therapy = c(NA, NA), treatment_effect = c(NA, NA), thera…	not reported	Ascending colon	31	29706	Mucinous adenocarcinoma	no	2008	No	6th	T2	1980-03-01	N0	M0	not reported	41287738-0c99-5c29-984e-35bd7d3bd38b	C18.2	Ascending colon	Not Reported	not reported	Not Reported	50d2089e-bd03-5d68-9111-8562d510ba9e	not reported
TCGA-AA-3532-01A-01R-0821-07	TCGA-AA-3532	TCGA-AA-3532-01A	TP	Primary solid Tumor	TCGA-AA-3532-01A	1	Primary	2498a44f-8b61-4cd9-80c0-35972760f361	TCGA-AA-3532	Primary Tumor	NA	Solid Tissue	released	FALSE	Tumor	Unknown	Not Reported	NA	NA	0.7	82516932-0618-4e40-9b7f-bcc09639e261	0.3	0.7	No	Stage IIA	0	list(days_to_treatment_end = c(NA, NA), days_to_treatment_start = c(NA, NA), treatment_id = c("51f5678b-fb7a-5ceb-95e8-505064d85c3b", "c70e1fdf-17db-5fe1-8f17-b6532c7f260c"), submitter_id = c("TCGA-AA-3532_treatment_1", "TCGA-AA-3532_treatment"), treatment_type = c("Pharmaceutical Therapy, NOS", "Radiation Therapy, NOS"), regimen_or_line_of_therapy = c(NA, NA), treatment_effect = c(NA, NA), thera…	not reported	Colon, NOS	882	23133	Adenocarcinoma, NOS	no	2007	No	6th	T3	1940-03-01	N0	M0	not reported	296547dc-a1fc-57f1-9405-a025afd5f6a8	C18.9	Colon, NOS	Not Reported	not reported	Not Reported	c7f5a385-0816-57e2-9d91-bb93845c0662	not reported
TCGA-AA-3872-01A-01R-1022-07	TCGA-AA-3872	TCGA-AA-3872-01A	TP	Primary solid Tumor	TCGA-AA-3872-01A	1	Primary	b9e4c00a-fb0a-4727-992b-01bf4be1e73e	TCGA-AA-3872	Primary Tumor	NA	Solid Tissue	released	FALSE	Tumor	Unknown	Not Reported	NA	NA	0.8	ec2bb4ce-7f58-419e-935f-c6deed68e68c	0.3	1	No	Stage IV	0	list(days_to_treatment_end = c(NA, NA), days_to_treatment_start = c(NA, NA), treatment_id = c("50480b14-e548-55d9-b8f9-61100a937fa9", "cb0f51e1-01a6-5792-ab09-83cbdfc90661"), submitter_id = c("TCGA-AA-3872_treatment_1", "TCGA-AA-3872_treatment"), treatment_type = c("Pharmaceutical Therapy, NOS", "Radiation Therapy, NOS"), regimen_or_line_of_therapy = c(NA, NA), treatment_effect = c(NA, NA), thera…	not reported	Colon, NOS	0	16651	Adenocarcinoma, NOS	no	2009	No	6th	T4	1940-03-01	N2	M1	not reported	368d4ee6-74dd-534b-ba5f-6d4181e9495d	C18.9	Colon, NOS	Not Reported	not reported	Not Reported	8d70a87e-9b3e-599d-b4d9-0ebf8b538da4	not reported
TCGA-AA-3655-11A-01R-1723-07	TCGA-AA-3655	TCGA-AA-3655-11A	NT	Solid Tissue Normal	TCGA-AA-3655-11A	11	Not Applicable	8c017c53-ba54-44e3-9657-e6354849a2dc	TCGA-AA-3655	Solid Tissue Normal	NA	Solid Tissue	released	FALSE	Normal	Unknown	Not Reported	NA	NA	0.8	NA	0.6	0.9	No	Stage II	0	list(days_to_treatment_end = c(NA, NA), days_to_treatment_start = c(NA, NA), treatment_id = c("4e0ee602-6620-50e2-8c2c-ed461d3efc4c", "d444cf54-85de-5723-823f-2d43c8043ef9"), submitter_id = c("TCGA-AA-3655_treatment_1", "TCGA-AA-3655_treatment"), treatment_type = c("Pharmaceutical Therapy, NOS", "Radiation Therapy, NOS"), regimen_or_line_of_therapy = c(NA, NA), treatment_effect = c(NA, NA), thera…	not reported	Sigmoid colon	1856	24896	Adenocarcinoma, NOS	no	2005	No	5th	T3	1940-03-01	N0	M0	not reported	2be5eb4c-da5b-5987-adf9-6f89e1dc97de	C18.7	Sigmoid colon	Not Reported	not reported	Not Reported	4b00c9cf-301a-5ca7-8905-a7229fddb53a	not reported
TCGA-A6-5665-01B-03R-2302-07	TCGA-A6-5665	TCGA-A6-5665-01B	TP	Primary solid Tumor	TCGA-A6-5665-01B	1	Primary	f4337307-e3c2-46f5-aa59-e77e6e64d734	TCGA-A6-5665	Primary Tumor	NA	Solid Tissue	released	TRUE	Tumor	FFPE	Not Reported	NA	NA	NA	814c8056-1298-4941-9fde-c660dae23c0e	NA	NA	No	Stage IIA	0	list(days_to_treatment_end = c(NA, NA), days_to_treatment_start = c(NA, NA), treatment_id = c("26744759-4778-5baa-b97d-87f1cc418475", "e21825af-c3b3-5f46-a33f-c25ebe0864b2"), submitter_id = c("TCGA-A6-5665_treatment_1", "TCGA-A6-5665_treatment"), treatment_type = c("Pharmaceutical Therapy, NOS", "Radiation Therapy, NOS"), regimen_or_line_of_therapy = c(NA, NA), treatment_effect = c(NA, NA), thera…	not reported	Ascending colon	671	30915	Adenocarcinoma, NOS	no	2010	No	7th	T3	1940-03-01	N0	M0	not reported	8b065860-5850-5e13-9d3c-930da451c3bb	C18.2	Ascending colon	Not Reported	not reported	Not Reported	543de9e3-21d0-5beb-b2b2-383d1b1bd23a	white
TCGA-QL-A97D-01A-12R-A41B-07	TCGA-QL-A97D	TCGA-QL-A97D-01A	TP	Primary solid Tumor	TCGA-QL-A97D-01A	1	Primary	babd6a62-0359-4680-a8ed-1429a1bfb6a8	TCGA-QL-A97D	Primary Tumor	TRUE	Solid Tissue	released	FALSE	Tumor	OCT	Not Reported	378	280	NA	0433BF3F-FF22-4389-AEFF-60B092A69D88	NA	NA	No	Stage I	0	list(treatment_intent_type = c(NA, NA), updated_datetime = c("2019-07-31T18:37:57.255154-05:00", "2019-07-31T18:37:57.255154-05:00"), treatment_id = c("0f0e5ba2-0629-51bf-b730-ec19b9778d93", "ba9d6ce9-523f-5c35-aba3-c05b7e3d5a2b"), submitter_id = c("TCGA-QL-A97D_treatment", "TCGA-QL-A97D_treatment_1"), treatment_type = c("Radiation Therapy, NOS", "Pharmaceutical Therapy, NOS"), state = c("release…	not reported	Cecum	666	30914	Adenocarcinoma, NOS	no	2012	No	7th	T2	1940-03-01	N0	MX	not reported	f7148392-d98f-59bb-b516-0a107c8a1e55	C18.2	Cecum	Not Reported	not reported	Not Reported	8ee0efc9-c9c1-52ce-b7bd-8f066b7832e9	black or african american
TCGA-A6-5665-11A-01R-1653-07	TCGA-A6-5665	TCGA-A6-5665-11A	NT	Solid Tissue Normal	TCGA-A6-5665-11A	11	Not Applicable	5f481013-8a19-4a85-9426-874f21cf2bf8	TCGA-A6-5665	Solid Tissue Normal	NA	Solid Tissue	released	FALSE	Normal	Unknown	Not Reported	NA	NA	0.9	NA	0.9	1.5	No	Stage IIA	0	list(days_to_treatment_end = c(NA, NA), days_to_treatment_start = c(NA, NA), treatment_id = c("26744759-4778-5baa-b97d-87f1cc418475", "e21825af-c3b3-5f46-a33f-c25ebe0864b2"), submitter_id = c("TCGA-A6-5665_treatment_1", "TCGA-A6-5665_treatment"), treatment_type = c("Pharmaceutical Therapy, NOS", "Radiation Therapy, NOS"), regimen_or_line_of_therapy = c(NA, NA), treatment_effect = c(NA, NA), thera…	not reported	Ascending colon	671	30915	Adenocarcinoma, NOS	no	2010	No	7th	T3	1940-03-01	N0	M0	not reported	8b065860-5850-5e13-9d3c-930da451c3bb	C18.2	Ascending colon	Not Reported	not reported	Not Reported	543de9e3-21d0-5beb-b2b2-383d1b1bd23a	white
TCGA-QG-A5YW-01A-11R-A28H-07	TCGA-QG-A5YW	TCGA-QG-A5YW-01A	TP	Primary solid Tumor	TCGA-QG-A5YW-01A	1	Primary	d8dce266-1073-4bf2-a714-748e7e942635	TCGA-QG-A5YW	Primary Tumor	TRUE	Solid Tissue	released	FALSE	Tumor	OCT	Not Reported	568	230	NA	7DB0BAEA-F194-4372-AF76-9CBEB0F9C956	NA	NA	No	Stage IIIC	0	list(days_to_treatment_end = c(NA, NA), days_to_treatment_start = c(NA, NA), treatment_id = c("3b730be3-edf2-596a-87d3-87151770823c", "40a6fe0d-66f6-528e-81b6-b954d7e933ab"), submitter_id = c("TCGA-QG-A5YW_treatment_1", "TCGA-QG-A5YW_treatment"), treatment_type = c("Pharmaceutical Therapy, NOS", "Radiation Therapy, NOS"), regimen_or_line_of_therapy = c(NA, NA), treatment_effect = c(NA, NA), thera…	not reported	Cecum	896	20391	Adenocarcinoma, NOS	no	2011	No	7th	T3	1940-03-01	N2b	MX	not reported	bb8b7de9-849b-58c4-acac-313925a234ff	C18.0	Cecum	Not Reported	not reported	Not Reported	8ccba876-04ad-5a78-be07-abff876a88d3	black or african american
TCGA-A6-6137-01A-11R-1774-07	TCGA-A6-6137	TCGA-A6-6137-01A	TP	Primary solid Tumor	TCGA-A6-6137-01A	1	Primary	32fc9332-a9fd-47f6-9dee-6413e58e8cce	TCGA-A6-6137	Primary Tumor	NA	Solid Tissue	released	FALSE	Tumor	Unknown	Not Reported	NA	NA	0.8	700d53ad-bf88-4b4e-952a-6714e9a74a87	0.7	1.3	No	Stage IIIB	0	list(treatment_intent_type = c(NA, NA), updated_datetime = c("2019-07-31T18:26:19.867596-05:00", "2019-07-31T18:26:19.867596-05:00"), treatment_id = c("3a2e63d8-345e-5372-bef2-e132c26e3ed7", "601f391c-82e0-506d-a29b-3b5779337e07"), submitter_id = c("TCGA-A6-6137_treatment", "TCGA-A6-6137_treatment_1"), treatment_type = c("Radiation Therapy, NOS", "Pharmaceutical Therapy, NOS"), state = c("release…	not reported	Hepatic flexure of colon	824	20095	Adenocarcinoma, NOS	no	2010	No	NA	T3	1940-03-01	N1c	M0	not reported	1cc661f9-ce0c-514b-a349-8e07b9f29c93	C18.2	Hepatic flexure of colon	Not Reported	not reported	Not Reported	ec993a59-6692-52c9-ad70-b33396ef5706	white
TCGA-AD-6899-01A-11R-1928-07	TCGA-AD-6899	TCGA-AD-6899-01A	TP	Primary solid Tumor	TCGA-AD-6899-01A	1	Primary	73f2fc25-c775-4567-8ca1-5732aa0dd156	TCGA-AD-6899	Primary Tumor	NA	Solid Tissue	released	FALSE	Tumor	Unknown	Not Reported	NA	NA	1	d2761f85-daab-4236-bff3-d7ec6927a166	0.4	1	No	Stage IIIC	0	list(treatment_intent_type = c(NA, NA), updated_datetime = c("2019-07-31T18:39:53.127160-05:00", "2019-07-31T18:39:53.127160-05:00"), treatment_id = c("bb7b024c-9ed6-5de7-8b71-3fdc2b4a525b", "c59a2d09-b2c6-544b-b070-d262d7ea4fde"), submitter_id = c("TCGA-AD-6899_treatment", "TCGA-AD-6899_treatment_1"), treatment_type = c("Radiation Therapy, NOS", "Pharmaceutical Therapy, NOS"), state = c("release…	not reported	Colon, NOS	48	30693	Mucinous adenocarcinoma	no	2011	No	7th	T4a	1980-03-01	N2b	MX	not reported	7ff5fb0e-c1ae-5b73-8a82-95b11c32689c	C18.9	Colon, NOS	Not Reported	not reported	Not Reported	94e54860-86ad-5fbb-a393-f639c7ab4d01	white
TCGA-CM-5868-01A-01R-1653-07	TCGA-CM-5868	TCGA-CM-5868-01A	TP	Primary solid Tumor	TCGA-CM-5868-01A	1	Primary	8983e29e-9354-4ce3-8f59-702032f1c25c	TCGA-CM-5868	Primary Tumor	NA	Solid Tissue	released	FALSE	Tumor	Unknown	Not Reported	NA	NA	0.8	f5259a76-974f-483b-a980-cb39b45fd791	0.3	1	No	Stage IVA	0	list(treatment_intent_type = c(NA, NA), updated_datetime = c("2019-07-31T18:27:56.334448-05:00", "2019-07-31T18:27:56.334448-05:00"), treatment_id = c("070743c9-ebd9-5a37-8c54-cc49eea32be3", "98034aff-650a-58fc-96eb-cf8b9b67e6dd"), submitter_id = c("TCGA-CM-5868_treatment", "TCGA-CM-5868_treatment_1"), treatment_type = c("Radiation Therapy, NOS", "Pharmaceutical Therapy, NOS"), state = c("release…	not reported	Sigmoid colon	518	21672	Adenocarcinoma, NOS	no	2010	No	7th	T4a	1940-03-01	N1a	M1a	not reported	f8558795-eee3-52a5-9269-6ab3c053b18f	C18.7	Sigmoid colon	Not Reported	not reported	Not Reported	03dc9ec4-d540-579c-8f86-ddbcb2c9b8f4	white
TCGA-DM-A1D7-01A-11R-A155-07	TCGA-DM-A1D7	TCGA-DM-A1D7-01A	TP	Primary solid Tumor	TCGA-DM-A1D7-01A	1	Primary	18364fcc-5f9c-4e3f-8a9e-56ed18ac893e	TCGA-DM-A1D7	Primary Tumor	FALSE	Solid Tissue	released	FALSE	Tumor	Unknown	Not Reported	3939	160	NA	73512C13-D2EB-4E6C-9A26-3759252F385A	NA	NA	No	Stage IIA	0	list(days_to_treatment_end = c(NA, NA), days_to_treatment_start = c(NA, NA), treatment_id = c("19f05386-bead-5369-9f23-ed5c345920e5", "60a456a3-d828-566c-bd58-48c07f33ab7e"), submitter_id = c("TCGA-DM-A1D7_treatment_1", "TCGA-DM-A1D7_treatment"), treatment_type = c("Pharmaceutical Therapy, NOS", "Radiation Therapy, NOS"), regimen_or_line_of_therapy = c(NA, NA), treatment_effect = c(NA, NA), thera…	not reported	Sigmoid colon	405	30142	Mucinous adenocarcinoma	no	2000	No	NA	T3	1980-03-01	N0	M0	not reported	c7b03e7d-f7a6-5cab-ba53-b6a1a2994e67	C18.7	Sigmoid colon	Not Reported	not reported	Not Reported	8a1c81f2-d4d3-519a-a882-d23029670211	white
TCGA-CA-6717-01A-11R-1839-07	TCGA-CA-6717	TCGA-CA-6717-01A	TP	Primary solid Tumor	TCGA-CA-6717-01A	1	Primary	d412011f-061c-43d6-8fa7-f917da658aff	TCGA-CA-6717	Primary Tumor	NA	Solid Tissue	released	FALSE	Tumor	Unknown	Not Reported	NA	NA	1.1	c742df4b-4aef-41cf-aba3-64d67e942141	0.7	1.5	No	Stage IIA	0	list(days_to_treatment_end = c(NA, NA), days_to_treatment_start = c(NA, NA), treatment_id = c("6b02d7c6-a5d8-5b28-ae2b-c37654c8e214", "b8d19e49-4343-5650-8c18-b9f789029466"), submitter_id = c("TCGA-CA-6717_treatment_1", "TCGA-CA-6717_treatment"), treatment_type = c("Pharmaceutical Therapy, NOS", "Radiation Therapy, NOS"), regimen_or_line_of_therapy = c(NA, NA), treatment_effect = c(NA, NA), thera…	not reported	Ascending colon	388	20984	Mucinous adenocarcinoma	no	2010	No	6th	T3	1980-03-01	N0	M0	not reported	de6eb804-6c2b-5cbb-8781-e940d79e7fc0	C18.2	Ascending colon	Not Reported	not reported	Not Reported	05028685-f8d3-5c52-a087-a136cb79f52b	asian
TCGA-AA-3673-01A-01R-0905-07	TCGA-AA-3673	TCGA-AA-3673-01A	TP	Primary solid Tumor	TCGA-AA-3673-01A	1	Primary	8ca89bdb-5e75-4432-a825-bef048fb48c2	TCGA-AA-3673	Primary Tumor	NA	Solid Tissue	released	FALSE	Tumor	Unknown	Not Reported	NA	NA	0.7	36b13eac-d940-40dc-b7e3-c215165d303b	0.3	1	No	Stage II	0	list(treatment_intent_type = c(NA, NA), updated_datetime = c("2019-07-31T18:29:37.514182-05:00", "2019-07-31T18:29:37.514182-05:00"), treatment_id = c("1c617fd6-8de5-538e-b29a-97d4d6f43743", "f6af04f7-6b81-559c-9771-f636745b70e6"), submitter_id = c("TCGA-AA-3673_treatment", "TCGA-AA-3673_treatment_1"), treatment_type = c("Radiation Therapy, NOS", "Pharmaceutical Therapy, NOS"), state = c("release…	not reported	Transverse colon	1522	19509	Adenocarcinoma, NOS	no	2006	No	5th	T3	1940-03-01	N0	M0	not reported	9aa00f9a-c92a-52a6-a67a-d21d2ee470a7	C18.4	Transverse colon	Not Reported	not reported	Not Reported	96f46d46-80cb-5607-99bf-0cd3751dd726	not reported
TCGA-CM-6675-01A-11R-1839-07	TCGA-CM-6675	TCGA-CM-6675-01A	TP	Primary solid Tumor	TCGA-CM-6675-01A	1	Primary	f954eaaa-3a62-4fe9-8568-ad2386548edd	TCGA-CM-6675	Primary Tumor	NA	Solid Tissue	released	FALSE	Tumor	Unknown	Not Reported	NA	NA	2	5dbfd78d-0f01-401c-8e64-934db33a89da	0.4	2	No	Stage IVB	0	list(treatment_intent_type = c(NA, NA), updated_datetime = c("2019-07-31T18:41:09.062845-05:00", "2019-07-31T18:41:09.062845-05:00"), treatment_id = c("0afb1a2a-af33-5a35-848c-66fb6ffffb06", "23fdf036-f01a-5c46-b363-683d3135e1bd"), submitter_id = c("TCGA-CM-6675_treatment", "TCGA-CM-6675_treatment_1"), treatment_type = c("Radiation Therapy, NOS", "Pharmaceutical Therapy, NOS"), state = c("release…	not reported	Cecum	397	12935	Adenocarcinoma, NOS	no	2011	No	7th	T3	1940-03-01	N2b	M1b	not reported	d4767b82-2b32-57c6-b805-c54a60c2d221	C18.0	Cecum	Not Reported	not reported	Not Reported	ed9d48a7-3d41-52e0-a3e6-de5c6d93dc63	black or african american
TCGA-AA-3538-01A-01R-0821-07	TCGA-AA-3538	TCGA-AA-3538-01A	TP	Primary solid Tumor	TCGA-AA-3538-01A	1	Primary	3b556594-eff5-4a2a-9cbf-3f81456069f8	TCGA-AA-3538	Primary Tumor	NA	Solid Tissue	released	FALSE	Tumor	Unknown	Not Reported	NA	NA	0.5	32912174-66b8-4144-9ef0-26b04c05e568	0.3	0.9	No	Stage I	0	list(days_to_treatment_end = c(NA, NA), days_to_treatment_start = c(NA, NA), treatment_id = c("273f2518-6b11-5b4f-b64a-a2b53862e4b7", "f8f535ab-c153-5298-9911-44085d46490b"), submitter_id = c("TCGA-AA-3538_treatment_1", "TCGA-AA-3538_treatment"), treatment_type = c("Pharmaceutical Therapy, NOS", "Radiation Therapy, NOS"), regimen_or_line_of_therapy = c(NA, NA), treatment_effect = c(NA, NA), thera…	not reported	Sigmoid colon	791	19752	Adenocarcinoma, NOS	no	2008	No	6th	T2	1940-03-01	N0	M0	not reported	1f283489-a15c-5177-9d42-551a578dd6ae	C18.7	Sigmoid colon	Not Reported	not reported	Not Reported	e0bcab42-0935-5ac1-910e-2b1cec10772c	not reported
TCGA-G4-6299-01A-11R-1774-07	TCGA-G4-6299	TCGA-G4-6299-01A	TP	Primary solid Tumor	TCGA-G4-6299-01A	1	Primary	0bf53b2c-319a-4657-901f-a2182af61352	TCGA-G4-6299	Primary Tumor	NA	Solid Tissue	released	FALSE	Tumor	Unknown	Not Reported	NA	NA	0.8	a62d667b-71c5-4964-af06-9eabd0a1d256	0.1	1.1	No	Stage IIIC	0	list(days_to_treatment_end = c(NA, NA), days_to_treatment_start = c(NA, NA), treatment_id = c("63072edd-300f-579f-bec3-19e4160bd73e", "72c5c14c-3ddd-545b-a528-b691552e2bf0"), submitter_id = c("TCGA-G4-6299_treatment_1", "TCGA-G4-6299_treatment"), treatment_type = c("Pharmaceutical Therapy, NOS", "Radiation Therapy, NOS"), regimen_or_line_of_therapy = c(NA, NA), treatment_effect = c(NA, NA), thera…	not reported	Descending colon	2268	25318	Adenocarcinoma, NOS	no	2005	No	6th	T3	1940-03-01	N2	M0	not reported	ca62a6ee-c5b9-5405-aa95-12200788197f	C18.6	Descending colon	Not Reported	not reported	Not Reported	5d06d584-3903-5bbf-81a5-c41e71f01aac	white
TCGA-G4-6626-01A-11R-1774-07	TCGA-G4-6626	TCGA-G4-6626-01A	TP	Primary solid Tumor	TCGA-G4-6626-01A	1	Primary	2913b2f9-5f05-4e40-a1e7-7d5f1e17d6ab	TCGA-G4-6626	Primary Tumor	NA	Solid Tissue	released	FALSE	Tumor	Unknown	Not Reported	NA	NA	1	cde2661b-5cfe-4295-a585-75daacb1b9aa	0.6	1.8	No	Stage IIA	0	list(treatment_intent_type = c(NA, NA), updated_datetime = c("2019-07-31T18:27:09.600994-05:00", "2019-07-31T18:27:09.600994-05:00"), treatment_id = c("0dbe4d91-ad2d-51cd-92d7-b0aa029bff72", "877e6a97-ac4b-53eb-b2ae-4c6fdbdd5b78"), submitter_id = c("TCGA-G4-6626_treatment", "TCGA-G4-6626_treatment_1"), treatment_type = c("Radiation Therapy, NOS", "Pharmaceutical Therapy, NOS"), state = c("release…	not reported	Ascending colon	NA	32871	Adenocarcinoma, NOS	no	2006	No	6th	T3	1940-03-01	N0	M0	not reported	b6b850e3-6d12-5411-814c-a062478d40cf	C18.2	Ascending colon	Not Reported	not reported	Not Reported	de9feaf4-1b41-5fb4-8c3d-b4412f8c194c	white
TCGA-A6-4107-01A-02R-1410-07	TCGA-A6-4107	TCGA-A6-4107-01A	TP	Primary solid Tumor	TCGA-A6-4107-01A	1	Primary	45dc6d68-be3d-4955-954c-46bf948054f4	TCGA-A6-4107	Primary Tumor	NA	Solid Tissue	released	FALSE	Tumor	Unknown	Not Reported	NA	NA	0.7	ead64351-1c48-40cf-88d1-acea2f34a4ea	0.3	1	No	Stage IIIB	0	list(treatment_intent_type = c(NA, NA), updated_datetime = c("2019-07-31T18:34:51.481651-05:00", "2019-07-31T18:34:51.481651-05:00"), treatment_id = c("91d593b9-ac8c-5672-8bbf-2680e8124a02", "ef9938b5-3563-5cec-b067-5c6c0040373b"), submitter_id = c("TCGA-A6-4107_treatment", "TCGA-A6-4107_treatment_1"), treatment_type = c("Radiation Therapy, NOS", "Pharmaceutical Therapy, NOS"), state = c("release…	not reported	Ascending colon	987	21064	Adenocarcinoma, NOS	no	2010	No	7th	T3	1940-03-01	N1b	M0	not reported	b1823162-a683-563f-ae54-d555f837203b	C18.2	Ascending colon	Not Reported	not reported	Not Reported	0a99a0f4-1452-51a3-aa58-15683ca1e763	white
TCGA-SS-A7HO-01A-21R-A37K-07	TCGA-SS-A7HO	TCGA-SS-A7HO-01A	TP	Primary solid Tumor	TCGA-SS-A7HO-01A	1	Primary	c5849720-9d9f-4af4-9649-27f7a32ba779	TCGA-SS-A7HO	Primary Tumor	FALSE	Solid Tissue	released	FALSE	Tumor	Unknown	Not Reported	1270	690	NA	81FC9A66-472B-488F-BE20-BE2E74E5A0D6	NA	NA	No	Stage IIB	0	list(treatment_intent_type = c(NA, NA), updated_datetime = c("2019-07-31T15:17:26.300299-05:00", "2019-07-31T15:17:26.300299-05:00"), treatment_id = c("12d514ba-b232-530b-b140-a7137fcd6480", "25f7e529-07f2-5f18-baa3-7c9c9b35d44a"), submitter_id = c("TCGA-SS-A7HO_treatment", "TCGA-SS-A7HO_treatment_1"), treatment_type = c("Radiation Therapy, NOS", "Pharmaceutical Therapy, NOS"), state = c("release…	not reported	Cecum	1829	16416	Adenocarcinoma, NOS	no	2010	No	7th	T4a	1940-03-01	N0	M0	not reported	f9a59249-5f0b-5d2e-ae31-3e376510491b	C18.0	Cecum	Not Reported	not reported	Not Reported	bc1fcc4b-8f4e-52f0-95a4-a989eb162e46	black or african american
TCGA-D5-6923-01A-11R-A32Z-07	TCGA-D5-6923	TCGA-D5-6923-01A	TP	Primary solid Tumor	TCGA-D5-6923-01A	1	Primary	617f14fe-153c-4ddc-b280-600c1fa08ad5	TCGA-D5-6923	Primary Tumor	NA	Solid Tissue	released	FALSE	Tumor	Unknown	Not Reported	NA	NA	0.8	3523f7ac-0a52-44cb-9b99-068955ccb1da	0.5	1	No	Stage I	0	list(days_to_treatment_end = c(NA, NA), days_to_treatment_start = c(NA, NA), treatment_id = c("63dcdf27-3164-5c43-897c-85098fc28d6c", "f021cae6-194d-5f6d-b7db-00175a2d2833"), submitter_id = c("TCGA-D5-6923_treatment_1", "TCGA-D5-6923_treatment"), treatment_type = c("Pharmaceutical Therapy, NOS", "Radiation Therapy, NOS"), regimen_or_line_of_therapy = c(NA, NA), treatment_effect = c(NA, NA), thera…	not reported	Sigmoid colon	378	21118	Adenocarcinoma, NOS	no	2011	No	7th	T2	1940-03-01	N0	M0	not reported	c89b3bc7-35a1-5a24-8d9f-383ff624c55d	C18.7	Sigmoid colon	Not Reported	not reported	Not Reported	86c5e869-2d7a-56b6-8b14-c7a380b0c19e	white
TCGA-AA-3980-01A-02R-1022-07	TCGA-AA-3980	TCGA-AA-3980-01A	TP	Primary solid Tumor	TCGA-AA-3980-01A	1	Primary	2c2efcd3-bf49-4619-80e1-bfb614ab6b23	TCGA-AA-3980	Primary Tumor	NA	Solid Tissue	released	FALSE	Tumor	Unknown	Not Reported	NA	NA	0.7	336fe62c-a0fd-4e99-93dd-15d755bd709b	0.3	0.9	No	Stage I	0	list(treatment_intent_type = c(NA, NA), updated_datetime = c("2019-07-31T18:26:49.581278-05:00", "2019-07-31T18:26:49.581278-05:00"), treatment_id = c("697d562a-0c5f-5861-9409-fde97fc4003a", "dc074e22-6183-5d20-b83a-919ff63c5729"), submitter_id = c("TCGA-AA-3980_treatment", "TCGA-AA-3980_treatment_1"), treatment_type = c("Radiation Therapy, NOS", "Pharmaceutical Therapy, NOS"), state = c("release…	not reported	Colon, NOS	242	32630	Adenocarcinoma, NOS	no	2009	No	6th	T2	1940-03-01	N0	M0	not reported	459930e0-5f0f-5abe-8d68-f0fa595f29b6	C18.9	Colon, NOS	Not Reported	not reported	Not Reported	6b8e27c8-914e-5f75-a5ca-3e29226b075c	not reported
TCGA-AA-3955-01A-02R-1022-07	TCGA-AA-3955	TCGA-AA-3955-01A	TP	Primary solid Tumor	TCGA-AA-3955-01A	1	Primary	b7ac160a-52a7-400f-9ff8-86eeec078b15	TCGA-AA-3955	Primary Tumor	NA	Solid Tissue	released	FALSE	Tumor	Unknown	Not Reported	NA	NA	0.6	20cb4d37-71cc-4ce2-a126-801ef9c251ea	0.4	0.6	No	Stage IIIB	0	list(days_to_treatment_end = c(NA, NA), days_to_treatment_start = c(NA, NA), treatment_id = c("00f7fe95-19ae-5f68-a2d7-02472f554f5e", "ad713610-d5ab-58b2-87d4-de20ece4524b"), submitter_id = c("TCGA-AA-3955_treatment_1", "TCGA-AA-3955_treatment"), treatment_type = c("Pharmaceutical Therapy, NOS", "Radiation Therapy, NOS"), regimen_or_line_of_therapy = c(NA, NA), treatment_effect = c(NA, NA), thera…	not reported	Colon, NOS	638	14186	Adenocarcinoma, NOS	no	2010	No	7th	T2	1940-03-01	N2a	M0	not reported	7eb98bf4-2628-5c83-9296-87f2080d4666	C18.9	Colon, NOS	Not Reported	not reported	Not Reported	f0b5fc74-e7c3-5e4c-8706-0415fb08c594	not reported
TCGA-AA-3856-01A-01R-0905-07	TCGA-AA-3856	TCGA-AA-3856-01A	TP	Primary solid Tumor	TCGA-AA-3856-01A	1	Primary	67d6e183-9565-4e35-be64-30cfb74b2b65	TCGA-AA-3856	Primary Tumor	NA	Solid Tissue	released	FALSE	Tumor	Unknown	Not Reported	NA	NA	0.5	9422f618-6ea5-49f3-9761-d176a5b59846	0.4	1.4	No	Stage IIA	0	list(treatment_intent_type = c(NA, NA), updated_datetime = c("2019-07-31T18:23:01.410801-05:00", "2019-07-31T18:23:01.410801-05:00"), treatment_id = c("8239157e-e73e-520a-95c9-ca57bbf51b80", "b6577e43-026b-5936-908d-79ed96d8074f"), submitter_id = c("TCGA-AA-3856_treatment", "TCGA-AA-3856_treatment_1"), treatment_type = c("Radiation Therapy, NOS", "Pharmaceutical Therapy, NOS"), state = c("release…	not reported	Colon, NOS	30	21670	Adenocarcinoma, NOS	no	2009	No	6th	T3	1940-03-01	N0	M0	not reported	f8717a06-4e06-5f14-9263-694a16b7d976	C18.9	Colon, NOS	Not Reported	not reported	Not Reported	addd63a3-1917-5c39-8c8c-3dbf786b65f9	not reported
TCGA-CK-5915-01A-11R-1653-07	TCGA-CK-5915	TCGA-CK-5915-01A	TP	Primary solid Tumor	TCGA-CK-5915-01A	1	Primary	076808f3-1a00-4c82-bfa3-91a325f1e73c	TCGA-CK-5915	Primary Tumor	NA	Solid Tissue	released	FALSE	Tumor	Unknown	Not Reported	NA	NA	0.3	d5358031-11c7-401b-a9d2-0c8db1d9ed14	0.3	0.5	No	Stage I	0	list(days_to_treatment_end = c(NA, NA), days_to_treatment_start = c(NA, NA), treatment_id = c("5ee91552-9a1a-510f-8705-edc7099883cf", "a95d6130-e77e-52fa-885f-513915962fad"), submitter_id = c("TCGA-CK-5915_treatment_1", "TCGA-CK-5915_treatment"), treatment_type = c("Pharmaceutical Therapy, NOS", "Radiation Therapy, NOS"), regimen_or_line_of_therapy = c(NA, NA), treatment_effect = c(NA, NA), thera…	not reported	Sigmoid colon	0	23040	Adenocarcinoma, NOS	no	2007	No	6th	T2	1940-03-01	N0	MX	not reported	2c028632-1922-56fe-8752-cfad3a87a6c9	C18.7	Sigmoid colon	Not Reported	not reported	Not Reported	65085f70-9c47-5c3e-8974-50833260384b	white
TCGA-A6-A566-01A-11R-A28H-07	TCGA-A6-A566	TCGA-A6-A566-01A	TP	Primary solid Tumor	TCGA-A6-A566-01A	1	Primary	615fdee9-637e-45c6-8909-36b9201a8eb7	TCGA-A6-A566	Primary Tumor	FALSE	Solid Tissue	released	FALSE	Tumor	Unknown	Not Reported	1827	380	NA	D2679879-72B7-4515-9496-B1FCE87C8571	NA	NA	No	Stage IIIB	0	list(days_to_treatment_end = c(NA, NA), days_to_treatment_start = c(NA, NA), treatment_id = c("9b48d275-85e1-5c21-ba3a-94e310ecc787", "d2cdb34c-1b08-5449-af5a-e92ca6358fc7"), submitter_id = c("TCGA-A6-A566_treatment_1", "TCGA-A6-A566_treatment"), treatment_type = c("Pharmaceutical Therapy, NOS", "Radiation Therapy, NOS"), regimen_or_line_of_therapy = c(NA, NA), treatment_effect = c(NA, NA), thera…	not reported	Descending colon	NA	20181	Mucinous adenocarcinoma	no	2007	No	6th	T4	1980-03-01	N1	M0	not reported	df472421-61b7-5f90-84af-163805514b04	C18.6	Descending colon	Not Reported	not reported	Not Reported	74199da3-eb43-526f-9c84-6aab37751669	black or african american
TCGA-A6-2686-11A-01R-A32Z-07	TCGA-A6-2686	TCGA-A6-2686-11A	NT	Solid Tissue Normal	TCGA-A6-2686-11A	11	Not Applicable	18c61df8-633b-4eb7-89c8-417ff90d11f9	TCGA-A6-2686	Solid Tissue Normal	NA	Solid Tissue	released	FALSE	Normal	Unknown	Not Reported	NA	NA	0.6	NA	0.6	1	No	Stage IIA	0	list(treatment_intent_type = c(NA, NA), updated_datetime = c("2019-07-31T18:24:25.530554-05:00", "2019-07-31T18:24:25.530554-05:00"), treatment_id = c("b9c10f28-450f-582c-82a6-a2de77d10dec", "c75b2c45-1dd6-54b8-8678-1df96d938b58"), submitter_id = c("TCGA-A6-2686_treatment", "TCGA-A6-2686_treatment_1"), treatment_type = c("Radiation Therapy, NOS", "Pharmaceutical Therapy, NOS"), state = c("release…	not reported	Colon, NOS	488	29623	Adenocarcinoma, NOS	no	2009	No	6th	T3	1940-03-01	N0	M0	not reported	b2a175d4-c7ee-5a11-99d2-fbc2d42047db	C18.9	Colon, NOS	Not Reported	not reported	Not Reported	e06d83a2-b106-5cdf-ab65-af777f32769b	white
TCGA-CA-6715-01A-21R-1839-07	TCGA-CA-6715	TCGA-CA-6715-01A	TP	Primary solid Tumor	TCGA-CA-6715-01A	1	Primary	7628cf2b-c65a-422c-bb64-d0361de85f20	TCGA-CA-6715	Primary Tumor	NA	Solid Tissue	released	FALSE	Tumor	Unknown	Not Reported	NA	NA	0.8	7deab36c-4645-43fe-a82c-14858dd568d4	0.6	2	No	Stage IIIB	0	list(treatment_intent_type = c(NA, NA), updated_datetime = c("2019-07-31T18:31:03.894059-05:00", "2019-07-31T18:31:03.894059-05:00"), treatment_id = c("180d7b1d-432c-528b-bd58-d4c3cfaee91d", "d548e4ce-e339-5c49-a6bb-ff719a15b95c"), submitter_id = c("TCGA-CA-6715_treatment", "TCGA-CA-6715_treatment_1"), treatment_type = c("Radiation Therapy, NOS", "Pharmaceutical Therapy, NOS"), state = c("release…	not reported	Sigmoid colon	383	23075	Papillary adenocarcinoma, NOS	no	2010	No	6th	T3	1960-03-01	N1	M0	not reported	9d814031-9478-53a6-b1e6-5e51b9726c84	C18.7	Sigmoid colon	Not Reported	not reported	Not Reported	0644337a-5a8d-50d8-8b76-c0b0974a493e	asian
TCGA-A6-5659-11A-01R-1653-07	TCGA-A6-5659	TCGA-A6-5659-11A	NT	Solid Tissue Normal	TCGA-A6-5659-11A	11	Not Applicable	54aad2df-8ee1-474f-8d94-858cfca51970	TCGA-A6-5659	Solid Tissue Normal	NA	Solid Tissue	released	FALSE	Normal	Unknown	Not Reported	NA	NA	0.9	NA	0.6	2.4	No	Stage I	0	list(treatment_intent_type = c(NA, NA), updated_datetime = c("2019-07-31T18:33:11.158741-05:00", "2019-07-31T18:33:11.158741-05:00"), treatment_id = c("34ca33a1-59da-55ed-a02b-c174f961f1ef", "e4c2ac8c-3e2c-5b97-bd59-9f3f0237a25a"), submitter_id = c("TCGA-A6-5659_treatment", "TCGA-A6-5659_treatment_1"), treatment_type = c("Radiation Therapy, NOS", "Pharmaceutical Therapy, NOS"), state = c("release…	not reported	Colon, NOS	926	30028	Adenocarcinoma, NOS	no	2010	No	NA	T2	1940-03-01	N0	M0	not reported	98c4bea5-1f9c-5c13-adc8-21ed84b5f07b	C18.2	Cecum	Not Reported	not reported	Not Reported	e9cc41ee-0309-53cd-a6a6-df68fc02b452	white
TCGA-AZ-4615-01A-01R-1410-07	TCGA-AZ-4615	TCGA-AZ-4615-01A	TP	Primary solid Tumor	TCGA-AZ-4615-01A	1	Primary	89811300-8202-4a82-8353-5b2b2b2ecfd4	TCGA-AZ-4615	Primary Tumor	NA	Solid Tissue	released	FALSE	Tumor	Unknown	Not Reported	NA	NA	0.9	ee4ea571-2dc8-470a-a442-291c85200546	0.2	1	No	Stage IIIB	0	list(treatment_intent_type = c(NA, NA), updated_datetime = c("2019-07-31T18:35:52.835712-05:00", "2019-07-31T18:35:52.835712-05:00"), treatment_id = c("7a193ef0-be86-58b3-a8fc-6613588d5b46", "a62b9452-0c1a-58b1-938b-36ed75f26f2d"), submitter_id = c("TCGA-AZ-4615_treatment", "TCGA-AZ-4615_treatment_1"), treatment_type = c("Radiation Therapy, NOS", "Pharmaceutical Therapy, NOS"), state = c("release…	not reported	Cecum	1002	30908	Adenocarcinoma, NOS	no	2009	No	NA	T3	1940-03-01	N1	M0	not reported	6c96bf54-d1a3-533f-9afd-1ec606635abf	C18.0	Cecum	Not Reported	not reported	Not Reported	ac53e2b0-ce05-51b3-8161-1b4d8b285876	white
TCGA-AA-A02W-01A-01R-A00A-07	TCGA-AA-A02W	TCGA-AA-A02W-01A	TP	Primary solid Tumor	TCGA-AA-A02W-01A	1	Primary	b0f0ea02-b1da-4613-a9b0-d18a07910010	TCGA-AA-A02W	Primary Tumor	FALSE	Solid Tissue	released	FALSE	Tumor	Unknown	Not Reported	1159	120	NA	257FBF57-5DB1-44D5-994D-64EFD1CA4E57	NA	NA	No	Stage I	0	list(treatment_intent_type = c(NA, NA), updated_datetime = c("2019-07-31T18:30:33.938759-05:00", "2019-07-31T18:30:33.938759-05:00"), treatment_id = c("0a470a6c-9605-5e7e-8a33-6f31b14d728e", "920161d9-7d4b-5353-ac75-7f0ec90bb8b2"), submitter_id = c("TCGA-AA-A02W_treatment", "TCGA-AA-A02W_treatment_1"), treatment_type = c("Radiation Therapy, NOS", "Pharmaceutical Therapy, NOS"), state = c("release…	not reported	Sigmoid colon	1247	26693	Adenocarcinoma, NOS	no	2006	No	5th	T2	1940-03-01	N0	M0	not reported	61fae6d0-d54a-5720-aea8-1ebb9f8c868c	C18.7	Sigmoid colon	Not Reported	not reported	Not Reported	0e0e7a8e-d9a0-5e14-b5b6-c4c9d93405bd	not reported
TCGA-AZ-6600-01A-11R-1774-07	TCGA-AZ-6600	TCGA-AZ-6600-01A	TP	Primary solid Tumor	TCGA-AZ-6600-01A	1	Primary	41a03a2c-133a-4d97-a7a5-f32ff8b2b697	TCGA-AZ-6600	Primary Tumor	NA	Solid Tissue	released	FALSE	Tumor	Unknown	Not Reported	NA	NA	1.4	04bdc987-860a-4318-95d4-9a703ec9ae41	0.4	2	No	Stage IV	0	list(days_to_treatment_end = c(NA, NA), days_to_treatment_start = c(NA, NA), treatment_id = c("d10547cf-fec1-5b9f-8830-f9bd9e561bfc", "e92da8e7-b8b1-50cc-9436-afd25958f9d0"), submitter_id = c("TCGA-AZ-6600_treatment_1", "TCGA-AZ-6600_treatment"), treatment_type = c("Pharmaceutical Therapy, NOS", "Radiation Therapy, NOS"), regimen_or_line_of_therapy = c(NA, NA), treatment_effect = c(NA, NA), thera…	not reported	Ascending colon	NA	23581	Adenocarcinoma, NOS	no	2001	No	5th	T4	1940-03-01	N1	M1	not reported	1e80f65b-6805-5579-b995-78644a73fac4	C18.2	Ascending colon	Not Reported	not reported	Not Reported	60a70558-ebca-573f-92fe-1c2d3eb32d2c	black or african american
TCGA-F4-6856-01A-11R-1928-07	TCGA-F4-6856	TCGA-F4-6856-01A	TP	Primary solid Tumor	TCGA-F4-6856-01A	1	Primary	b481fc53-5b7e-4e28-bb4d-71a25efa6dad	TCGA-F4-6856	Primary Tumor	NA	Solid Tissue	released	FALSE	Tumor	Unknown	Not Reported	NA	NA	1	b45764e2-a7ca-47ec-8a4f-d39fd7f190c8	0.6	2	No	Stage I	0	list(days_to_treatment_end = c(NA, NA), days_to_treatment_start = c(NA, NA), treatment_id = c("53751efe-7240-577c-9c98-e93c1bce5f9c", "6f821e06-04b6-5d96-9c84-b73875ee3e48"), submitter_id = c("TCGA-F4-6856_treatment_1", "TCGA-F4-6856_treatment"), treatment_type = c("Pharmaceutical Therapy, NOS", "Radiation Therapy, NOS"), regimen_or_line_of_therapy = c(NA, NA), treatment_effect = c(NA, NA), thera…	not reported	Cecum	1074	16519	Mucinous adenocarcinoma	no	2011	No	7th	T2	1980-03-01	N0	M0	not reported	bb7c2216-884f-5f97-bea6-80d70c76e6cd	C18.0	Cecum	Not Reported	not reported	Not Reported	cd34a8b0-baab-5756-9c59-30bbe82972e6	white
TCGA-A6-2684-11A-01R-A32Z-07	TCGA-A6-2684	TCGA-A6-2684-11A	NT	Solid Tissue Normal	TCGA-A6-2684-11A	11	Not Applicable	bf2b2ca1-17b5-4a4d-bae8-46f571129706	TCGA-A6-2684	Solid Tissue Normal	NA	Solid Tissue	released	FALSE	Normal	Unknown	Not Reported	NA	NA	0.7	NA	0.7	1.3	No	Stage I	0	list(treatment_intent_type = c(NA, NA), updated_datetime = c("2019-07-31T18:28:19.797349-05:00", "2019-07-31T18:28:19.797349-05:00"), treatment_id = c("1de044b2-fb47-5404-8f34-c51eabe91136", "9f3d6bda-e58b-5e9e-b68b-ff65cd96dd36"), submitter_id = c("TCGA-A6-2684_treatment", "TCGA-A6-2684_treatment_1"), treatment_type = c("Radiation Therapy, NOS", "Pharmaceutical Therapy, NOS"), state = c("release…	not reported	Colon, NOS	1127	27708	Adenocarcinoma, NOS	no	2009	No	NA	T2	1940-03-01	N0	M0	not reported	808ef8fb-23c4-5b7f-9546-90aba7a19854	C18.9	Colon, NOS	Not Reported	not reported	Not Reported	2a3d1ea4-8843-5edf-8e38-51552d28573a	white
TCGA-A6-2684-01A-01R-1410-07	TCGA-A6-2684	TCGA-A6-2684-01A	TP	Primary solid Tumor	TCGA-A6-2684-01A	1	Primary	73b6994e-c9bf-41a8-a455-17d7be309a9f	TCGA-A6-2684	Primary Tumor	NA	Solid Tissue	released	FALSE	Tumor	Unknown	Not Reported	NA	NA	0.9	9dabf713-dd0c-4388-b69e-f1bbb08e4d21	0.4	1	No	Stage I	0	list(treatment_intent_type = c(NA, NA), updated_datetime = c("2019-07-31T18:28:19.797349-05:00", "2019-07-31T18:28:19.797349-05:00"), treatment_id = c("1de044b2-fb47-5404-8f34-c51eabe91136", "9f3d6bda-e58b-5e9e-b68b-ff65cd96dd36"), submitter_id = c("TCGA-A6-2684_treatment", "TCGA-A6-2684_treatment_1"), treatment_type = c("Radiation Therapy, NOS", "Pharmaceutical Therapy, NOS"), state = c("release…	not reported	Colon, NOS	1127	27708	Adenocarcinoma, NOS	no	2009	No	NA	T2	1940-03-01	N0	M0	not reported	808ef8fb-23c4-5b7f-9546-90aba7a19854	C18.9	Colon, NOS	Not Reported	not reported	Not Reported	2a3d1ea4-8843-5edf-8e38-51552d28573a	white
TCGA-QG-A5Z2-01A-11R-A28H-07	TCGA-QG-A5Z2	TCGA-QG-A5Z2-01A	TP	Primary solid Tumor	TCGA-QG-A5Z2-01A	1	Primary	3d753b5b-8e33-4307-9321-e4ad4821f3bf	TCGA-QG-A5Z2	Primary Tumor	TRUE	Solid Tissue	released	FALSE	Tumor	OCT	Not Reported	337	140	NA	E997748F-FB20-4CF3-8621-966181B7AF2E	NA	NA	No	Stage I	0	list(days_to_treatment_end = c(NA, NA), days_to_treatment_start = c(NA, NA), treatment_id = c("b13e4a23-8cec-5aeb-803b-b9b92dfd9928", "fa64d202-7ce9-54ee-a895-56707450eb4e"), submitter_id = c("TCGA-QG-A5Z2_treatment_1", "TCGA-QG-A5Z2_treatment"), treatment_type = c("Pharmaceutical Therapy, NOS", "Radiation Therapy, NOS"), regimen_or_line_of_therapy = c(NA, NA), treatment_effect = c(NA, NA), thera…	not reported	Cecum	952	22367	Adenocarcinoma, NOS	no	2012	No	7th	T2	1940-03-01	N0	M0	not reported	b7ab64e0-5e21-5cdc-9b4b-be1c0f97e5fd	C18.0	Cecum	Not Reported	not reported	Not Reported	e1c0957f-315a-5d24-af94-18b37533aa4e	black or african american
TCGA-NH-A8F8-01A-72R-A41B-07	TCGA-NH-A8F8	TCGA-NH-A8F8-01A	TP	Primary solid Tumor	TCGA-NH-A8F8-01A	1	Primary	61715dc9-a28b-46a4-94a9-9a2b1b379831	TCGA-NH-A8F8	Primary Tumor	FALSE	Solid Tissue	released	FALSE	Tumor	Unknown	Not Reported	14	990	NA	0D65923F-583D-42C2-8CA3-0A209D5F0490	NA	NA	No	Stage IV	0	list(days_to_treatment_end = c(NA, NA), days_to_treatment_start = c(NA, NA), treatment_id = c("2d06febf-2316-5d5b-b0d3-30cebd159da3", "5baed5d3-9a90-59c6-8a45-15140bc619ca"), submitter_id = c("TCGA-NH-A8F8_treatment_1", "TCGA-NH-A8F8_treatment"), treatment_type = c("Pharmaceutical Therapy, NOS", "Radiation Therapy, NOS"), regimen_or_line_of_therapy = c(NA, NA), treatment_effect = c(NA, NA), thera…	not reported	Ascending colon	167	29185	Adenocarcinoma, NOS	no	2013	No	7th	T4a	1940-03-01	N2b	M1	not reported	ed18144d-6234-56bc-be7e-8db632076627	C18.2	Ascending colon	Not Reported	not reported	Not Reported	de6010e7-ea02-5336-b810-cf2047449c18	black or african american
TCGA-AA-3855-01A-01R-1022-07	TCGA-AA-3855	TCGA-AA-3855-01A	TP	Primary solid Tumor	TCGA-AA-3855-01A	1	Primary	2104463b-9421-47f3-9974-a00080c6e937	TCGA-AA-3855	Primary Tumor	NA	Solid Tissue	released	FALSE	Tumor	Unknown	Not Reported	NA	NA	0.6	f0eeaccf-d2eb-444f-b3e8-d9d3c3663272	0.4	0.9	No	Stage I	0	list(treatment_intent_type = c(NA, NA), updated_datetime = c("2019-07-31T18:35:08.449189-05:00", "2019-07-31T18:35:08.449189-05:00"), treatment_id = c("472ccc41-5466-5c24-ac99-c36ca3cd7d68", "a9e6c060-16e3-5f02-b7c3-17b3108a7360"), submitter_id = c("TCGA-AA-3855_treatment", "TCGA-AA-3855_treatment_1"), treatment_type = c("Radiation Therapy, NOS", "Pharmaceutical Therapy, NOS"), state = c("release…	not reported	Colon, NOS	975	26541	Adenocarcinoma, NOS	no	2009	No	6th	T2	1940-03-01	N0	M0	not reported	3bcea62f-d040-5e29-b658-1167db2407bc	C18.9	Colon, NOS	Not Reported	not reported	Not Reported	d6bb8192-3f98-52f8-91fb-6738394a8ef4	not reported
TCGA-AZ-6606-01A-11R-1839-07	TCGA-AZ-6606	TCGA-AZ-6606-01A	TP	Primary solid Tumor	TCGA-AZ-6606-01A	1	Primary	25d55cf4-625f-485f-85aa-87adb72e685b	TCGA-AZ-6606	Primary Tumor	NA	Solid Tissue	released	FALSE	Tumor	Unknown	Not Reported	NA	NA	1	9e1ac172-4eb9-4566-86fe-fe01648c4d8e	0.3	3	No	Stage IV	0	list(treatment_intent_type = c(NA, NA), updated_datetime = c("2019-07-31T18:36:54.279903-05:00", "2019-07-31T18:36:54.279903-05:00"), treatment_id = c("c2b1d1c8-f57b-5453-84ec-272080c77a5d", "f48bc66b-a20a-5116-92c9-737941d8cb89"), submitter_id = c("TCGA-AZ-6606_treatment", "TCGA-AZ-6606_treatment_1"), treatment_type = c("Radiation Therapy, NOS", "Pharmaceutical Therapy, NOS"), state = c("release…	not reported	Cecum	NA	29704	Adenocarcinoma, NOS	no	2009	No	6th	T4	1940-03-01	N2	M1	not reported	01f0bac9-2406-50e1-a1e2-30c80d8a1799	C18.0	Cecum	Not Reported	not reported	Not Reported	2d0660df-1726-54a2-8b53-5d4a0b1bf0b6	white
TCGA-AA-3956-01A-02R-1022-07	TCGA-AA-3956	TCGA-AA-3956-01A	TP	Primary solid Tumor	TCGA-AA-3956-01A	1	Primary	dc1ffda5-5b8f-4227-be04-321643f73731	TCGA-AA-3956	Primary Tumor	NA	Solid Tissue	released	FALSE	Tumor	Unknown	Not Reported	NA	NA	0.9	9bbb5e1a-4bbb-4882-a294-e0f13d82fa4c	0.4	1.5	No	Stage IIA	0	list(days_to_treatment_end = c(NA, NA), days_to_treatment_start = c(NA, NA), treatment_id = c("3038e1c4-9bc9-59c8-a909-4b348f6479c1", "724776c0-7e33-5c94-b954-18378fc18e1e"), submitter_id = c("TCGA-AA-3956_treatment_1", "TCGA-AA-3956_treatment"), treatment_type = c("Pharmaceutical Therapy, NOS", "Radiation Therapy, NOS"), regimen_or_line_of_therapy = c(NA, NA), treatment_effect = c(NA, NA), thera…	not reported	Cecum	1035	24045	Adenocarcinoma, NOS	no	2007	No	6th	T3	1940-03-01	N0	M0	not reported	a27f3617-a5a9-5fb9-aff5-5d437ea56f6f	C18.0	Cecum	Not Reported	not reported	Not Reported	cf337c08-5a2e-574c-bb64-06e0cf7bc659	not reported
TCGA-AY-6196-01A-11R-1723-07	TCGA-AY-6196	TCGA-AY-6196-01A	TP	Primary solid Tumor	TCGA-AY-6196-01A	1	Primary	2300f1fc-07fa-443c-bae8-f1b6fd3705bf	TCGA-AY-6196	Primary Tumor	NA	Solid Tissue	released	FALSE	Tumor	Unknown	Not Reported	NA	NA	1	e6e1533f-49e4-4e98-ae67-540b48beddfd	0.6	1.5	No	Stage IIIC	0	list(days_to_treatment_end = c(NA, NA), days_to_treatment_start = c(NA, NA), treatment_id = c("0d556875-fef1-5cd9-9879-1c31a5629385", "c3dc1cbc-f707-537f-a1f4-b3293fcc6da4"), submitter_id = c("TCGA-AY-6196_treatment_1", "TCGA-AY-6196_treatment"), treatment_type = c("Pharmaceutical Therapy, NOS", "Radiation Therapy, NOS"), regimen_or_line_of_therapy = c(NA, NA), treatment_effect = c(NA, NA), thera…	not reported	Ascending colon	6	17311	Mucinous adenocarcinoma	no	2010	No	7th	T3	1980-03-01	N2b	NA	not reported	e13556ab-3ce9-5348-92e4-8dae94370c62	C18.2	Ascending colon	Not Reported	not reported	Not Reported	7fa440e5-27ed-5364-bb38-212979d49df1	white
TCGA-AA-3877-01A-01R-1022-07	TCGA-AA-3877	TCGA-AA-3877-01A	TP	Primary solid Tumor	TCGA-AA-3877-01A	1	Primary	de7f6b99-ea71-4c44-b412-ab20b1616c40	TCGA-AA-3877	Primary Tumor	NA	Solid Tissue	released	FALSE	Tumor	Unknown	Not Reported	NA	NA	0.8	241490a3-7fd3-48f2-94d3-8cabb776e24b	0.3	0.9	No	Stage I	0	list(days_to_treatment_end = c(NA, NA), days_to_treatment_start = c(NA, NA), treatment_id = c("40ea7b0d-34dd-5baf-9d56-351dec55ce94", "b0947078-60ad-553c-b7ad-0c2f1728f5bb"), submitter_id = c("TCGA-AA-3877_treatment_1", "TCGA-AA-3877_treatment"), treatment_type = c("Pharmaceutical Therapy, NOS", "Radiation Therapy, NOS"), regimen_or_line_of_therapy = c(NA, NA), treatment_effect = c(NA, NA), thera…	not reported	Transverse colon	943	30377	Mucinous adenocarcinoma	no	2007	No	6th	T1	1980-03-01	N0	M0	not reported	7c64a78f-f0f8-5948-96a9-6385914267be	C18.4	Transverse colon	Not Reported	not reported	Not Reported	43c38d29-6abb-5c6f-bd07-360888a68c89	not reported
TCGA-AA-3666-01A-02R-0905-07	TCGA-AA-3666	TCGA-AA-3666-01A	TP	Primary solid Tumor	TCGA-AA-3666-01A	1	Primary	f1064663-1462-4901-8bf7-9f50da5ee7b1	TCGA-AA-3666	Primary Tumor	NA	Solid Tissue	released	FALSE	Tumor	Unknown	Not Reported	NA	NA	0.7	5e086073-b1d3-449c-876d-db4b53a78ada	0.6	0.8	No	Stage III	0	list(days_to_treatment_end = c(NA, NA), days_to_treatment_start = c(NA, NA), treatment_id = c("3c4e0051-d59e-5f98-a168-61d3f434e85b", "7a6fc1ba-6a17-5a59-822c-4d1961731575"), submitter_id = c("TCGA-AA-3666_treatment_1", "TCGA-AA-3666_treatment"), treatment_type = c("Pharmaceutical Therapy, NOS", "Radiation Therapy, NOS"), regimen_or_line_of_therapy = c(NA, NA), treatment_effect = c(NA, NA), thera…	not reported	Colon, NOS	NA	25020	Adenocarcinoma, NOS	no	2005	No	5th	T3	1940-03-01	N1	M0	not reported	b715b278-9765-55c9-bd18-682cd16bfd28	C18.9	Colon, NOS	Not Reported	not reported	Not Reported	fba0f502-c80c-5a04-a7d7-e61d518a6a22	not reported
TCGA-AA-3930-01A-01R-1022-07	TCGA-AA-3930	TCGA-AA-3930-01A	TP	Primary solid Tumor	TCGA-AA-3930-01A	1	Primary	ad9a1a30-a318-4e58-96b3-7d76ab3b6e5d	TCGA-AA-3930	Primary Tumor	NA	Solid Tissue	released	FALSE	Tumor	Unknown	Not Reported	NA	NA	0.4	6312f276-158b-4b14-9f8c-1b47adabb147	0.2	1	No	Stage IV	0	list(days_to_treatment_end = c(NA, NA), days_to_treatment_start = c(NA, NA), treatment_id = c("24ac957b-9f73-5f07-92a4-11686648c852", "a114c85f-fad9-5e71-8a49-6163d5b4a222"), submitter_id = c("TCGA-AA-3930_treatment_1", "TCGA-AA-3930_treatment"), treatment_type = c("Pharmaceutical Therapy, NOS", "Radiation Therapy, NOS"), regimen_or_line_of_therapy = c(NA, NA), treatment_effect = c(NA, NA), thera…	not reported	Ascending colon	0	24321	Adenocarcinoma, NOS	no	2008	No	6th	T3	1940-03-01	N2	M1	not reported	ae26a8ce-62c0-58b9-b5e3-ab09e552cb15	C18.2	Ascending colon	Not Reported	not reported	Not Reported	fe781034-b792-5e99-9b86-64a67c9568bc	not reported
TCGA-AA-3519-01A-02R-0821-07	TCGA-AA-3519	TCGA-AA-3519-01A	TP	Primary solid Tumor	TCGA-AA-3519-01A	1	Primary	68e7b9b7-1565-4034-91e9-9ec4e1a34b39	TCGA-AA-3519	Primary Tumor	NA	Solid Tissue	released	FALSE	Tumor	Unknown	Not Reported	NA	NA	1	127e9d44-2f7c-41f3-b925-d04812a8a9f6	0.4	1	No	Stage III	0	list(treatment_intent_type = c(NA, NA), updated_datetime = c("2019-07-31T18:22:52.065030-05:00", "2019-07-31T18:22:52.065030-05:00"), treatment_id = c("c0c679b4-aab2-5d29-af42-d3eaacfae877", "d48e56a7-0075-50d2-9fec-97ad201b5d01"), submitter_id = c("TCGA-AA-3519_treatment", "TCGA-AA-3519_treatment_1"), treatment_type = c("Radiation Therapy, NOS", "Pharmaceutical Therapy, NOS"), state = c("release…	not reported	Colon, NOS	276	23131	Adenocarcinoma, NOS	no	2007	No	5th	T3	1940-03-01	N1	M0	not reported	df2fc731-b831-5e6e-b2da-2c68b94f7fee	C18.9	Colon, NOS	Not Reported	not reported	Not Reported	7ce7ec25-2aa7-55f6-a1d2-8b65b407163e	not reported
TCGA-DM-A28F-01A-11R-A32Y-07	TCGA-DM-A28F	TCGA-DM-A28F-01A	TP	Primary solid Tumor	TCGA-DM-A28F-01A	1	Primary	418736a4-00d2-406b-a625-0d15726713ca	TCGA-DM-A28F	Primary Tumor	FALSE	Solid Tissue	released	FALSE	Tumor	Unknown	Not Reported	3347	90	NA	E6C435F8-1238-4113-A152-C7AF7620E748	NA	NA	No	Stage IIIB	0	list(days_to_treatment_end = c(NA, NA), days_to_treatment_start = c(NA, NA), treatment_id = c("5556f18c-b28c-53f7-b8d1-29d333e5a359", "faab77ea-5f40-5c10-ab77-49515e677f08"), submitter_id = c("TCGA-DM-A28F_treatment_1", "TCGA-DM-A28F_treatment"), treatment_type = c("Pharmaceutical Therapy, NOS", "Radiation Therapy, NOS"), regimen_or_line_of_therapy = c(NA, NA), treatment_effect = c(NA, NA), thera…	not reported	Sigmoid colon	1094	26856	Adenocarcinoma, NOS	no	2002	No	6th	T3	1940-03-01	N1	M0	not reported	f2411a03-df9b-5862-aa49-a10da2d2bb4a	C18.7	Sigmoid colon	Not Reported	not reported	Not Reported	4b6821bc-9560-5b24-b97a-b4e282a85e82	white
TCGA-AA-A010-01A-01R-A089-07	TCGA-AA-A010	TCGA-AA-A010-01A	TP	Primary solid Tumor	TCGA-AA-A010-01A	1	Primary	46fb1711-e385-49a4-bf15-7990123cbe6b	TCGA-AA-A010	Primary Tumor	FALSE	Solid Tissue	released	FALSE	Tumor	Unknown	Not Reported	599	700	NA	7C26217F-5005-4D0F-9E8A-01E31908AB01	NA	NA	No	Stage IIB	0	list(days_to_treatment_end = c(NA, NA), days_to_treatment_start = c(NA, NA), treatment_id = c("7029f67e-6718-557d-bd73-01fea28b1b74", "e5382d3b-c964-5d52-b5be-f9c97da0587e"), submitter_id = c("TCGA-AA-A010_treatment_1", "TCGA-AA-A010_treatment"), treatment_type = c("Pharmaceutical Therapy, NOS", "Radiation Therapy, NOS"), regimen_or_line_of_therapy = c(NA, NA), treatment_effect = c(NA, NA), thera…	not reported	Transverse colon	1064	16922	Adenocarcinoma, NOS	no	2008	No	6th	T4	1940-03-01	N0	M0	not reported	63966309-fae4-54a9-8724-918ae2f797fd	C18.4	Transverse colon	Not Reported	not reported	Not Reported	d94a75be-3b7e-5c5e-a6cd-433df604dcaf	not reported
TCGA-AA-3977-01A-01R-1022-07	TCGA-AA-3977	TCGA-AA-3977-01A	TP	Primary solid Tumor	TCGA-AA-3977-01A	1	Primary	56dd63cb-cf0a-48c3-bccc-c5094f8d8ac0	TCGA-AA-3977	Primary Tumor	NA	Solid Tissue	released	FALSE	Tumor	Unknown	Not Reported	NA	NA	0.3	0af2b6cb-f718-4d12-b444-2feb4730ea27	0.2	0.4	No	NA	0	list(days_to_treatment_end = c(NA, NA), days_to_treatment_start = c(NA, NA), treatment_id = c("701627c7-2026-565d-b8f0-a28da4a7928c", "e9c60634-1f04-5aa2-8588-4f786247e7c8"), submitter_id = c("TCGA-AA-3977_treatment_1", "TCGA-AA-3977_treatment"), treatment_type = c("Pharmaceutical Therapy, NOS", "Radiation Therapy, NOS"), regimen_or_line_of_therapy = c(NA, NA), treatment_effect = c(NA, NA), thera…	not reported	Sigmoid colon	761	23832	Adenocarcinoma, NOS	no	2009	No	6th	T2	1940-03-01	N0	NA	not reported	48f1359c-b897-5b62-b04d-31de46bc5dc2	C18.7	Sigmoid colon	Not Reported	not reported	Not Reported	af3b0c37-0112-5b69-ad70-a951ae45edae	not reported
TCGA-DM-A288-01A-11R-A16W-07	TCGA-DM-A288	TCGA-DM-A288-01A	TP	Primary solid Tumor	TCGA-DM-A288-01A	1	Primary	73e8948f-809c-4fb4-8174-caaa7f202f76	TCGA-DM-A288	Primary Tumor	FALSE	Solid Tissue	released	FALSE	Tumor	Unknown	Not Reported	3699	120	NA	EB32DBF8-FC70-4848-9595-45B295D698B5	NA	NA	No	Stage IIIC	0	list(treatment_intent_type = c(NA, NA), updated_datetime = c("2019-07-31T18:24:00.473294-05:00", "2019-07-31T18:24:00.473294-05:00"), treatment_id = c("914c1f9b-2918-5508-80d7-81ee648284a4", "b1f76d43-7656-512f-ac11-fd3f0314c474"), submitter_id = c("TCGA-DM-A288_treatment", "TCGA-DM-A288_treatment_1"), treatment_type = c("Radiation Therapy, NOS", "Pharmaceutical Therapy, NOS"), state = c("release…	not reported	Cecum	427	25084	Mucinous adenocarcinoma	no	2001	No	6th	T3	1980-03-01	N2	M0	not reported	2b982cbb-fec5-5422-9975-4897eb665b79	C18.0	Cecum	Not Reported	not reported	Not Reported	23625c88-a3f5-5ad1-ae15-7ff7b3313d6e	white
TCGA-F4-6461-01A-11R-1774-07	TCGA-F4-6461	TCGA-F4-6461-01A	TP	Primary solid Tumor	TCGA-F4-6461-01A	1	Primary	115e6be9-dd9a-4137-8a5c-821ff7860a8f	TCGA-F4-6461	Primary Tumor	NA	Solid Tissue	released	FALSE	Tumor	Unknown	Not Reported	NA	NA	2.2	2a2e4b4c-eca6-4e8b-a84f-193c7c87b6b0	0.5	2.8	No	Stage IIIC	0	list(treatment_intent_type = c(NA, NA), updated_datetime = c("2019-07-31T18:25:40.677636-05:00", "2019-07-31T18:25:40.677636-05:00"), treatment_id = c("90daebd6-a63b-55b7-8f2f-5ca13ec48ce4", "a2bba4f1-d6bf-5627-8596-ce1fbff81850"), submitter_id = c("TCGA-F4-6461_treatment", "TCGA-F4-6461_treatment_1"), treatment_type = c("Radiation Therapy, NOS", "Pharmaceutical Therapy, NOS"), state = c("release…	not reported	Colon, NOS	0	15151	Adenocarcinoma, NOS	no	2011	No	7th	T4b	1940-03-01	N2	M0	not reported	523d8470-1368-5f8b-97eb-5455a11d7047	C18.9	Colon, NOS	Not Reported	not reported	Not Reported	1615b7be-6531-5277-905c-c98bad5311d7	white
TCGA-D5-6541-01A-11R-1723-07	TCGA-D5-6541	TCGA-D5-6541-01A	TP	Primary solid Tumor	TCGA-D5-6541-01A	1	Primary	46f8f339-748f-4fcd-aeee-6ead28bc5010	TCGA-D5-6541	Primary Tumor	NA	Solid Tissue	released	FALSE	Tumor	Unknown	Not Reported	NA	NA	0.6	93f340fa-2fe6-4d79-a8e8-7233c8c1b536	0.4	0.7	No	Stage IIA	0	list(treatment_intent_type = c(NA, NA), updated_datetime = c("2019-07-31T18:26:55.424068-05:00", "2019-07-31T18:26:55.424068-05:00"), treatment_id = c("419c940f-da8f-5aa5-9fc6-fb08deb33d0c", "a18147ec-1f1e-5f7e-a4f5-b6a8731b5f92"), submitter_id = c("TCGA-D5-6541_treatment", "TCGA-D5-6541_treatment_1"), treatment_type = c("Radiation Therapy, NOS", "Pharmaceutical Therapy, NOS"), state = c("release…	not reported	Splenic flexure of colon	474	18029	Adenocarcinoma, NOS	no	2010	No	NA	T3	1940-03-01	N0	M0	not reported	6ea1e532-5515-5898-9eb4-4795350668a2	C18.5	Splenic flexure of colon	Not Reported	not reported	Not Reported	3c5763cb-054a-55b6-b701-3ed8bc078e70	white
TCGA-F4-6460-01A-11R-1774-07	TCGA-F4-6460	TCGA-F4-6460-01A	TP	Primary solid Tumor	TCGA-F4-6460-01A	1	Primary	9ec837eb-3f91-4642-8563-15c725e6424c	TCGA-F4-6460	Primary Tumor	NA	Solid Tissue	released	FALSE	Tumor	Unknown	Not Reported	NA	NA	1	037e666e-3821-4a1c-931e-c92fa5657f48	0.5	2	No	Stage IIIB	0	list(treatment_intent_type = c(NA, NA), updated_datetime = c("2019-07-31T18:25:43.844085-05:00", "2019-07-31T18:25:43.844085-05:00"), treatment_id = c("37e1f12b-a154-524f-a1a9-9a9a18c6b6c4", "d9aa12a0-847d-5278-ae52-73c0c657ecc9"), submitter_id = c("TCGA-F4-6460_treatment", "TCGA-F4-6460_treatment_1"), treatment_type = c("Radiation Therapy, NOS", "Pharmaceutical Therapy, NOS"), state = c("release…	not reported	Sigmoid colon	407	18637	Adenocarcinoma, NOS	no	2011	No	7th	T3	1940-03-01	N1	M0	not reported	d88794a7-88b5-5ecc-b191-3fd0ae42f848	C18.7	Sigmoid colon	Not Reported	not reported	Not Reported	7d75cacd-a2cd-5a2b-8949-74514f5f0e98	white
TCGA-AA-3869-01A-01R-1022-07	TCGA-AA-3869	TCGA-AA-3869-01A	TP	Primary solid Tumor	TCGA-AA-3869-01A	1	Primary	4d29cf3a-5427-4fb5-8513-803405d4a504	TCGA-AA-3869	Primary Tumor	NA	Solid Tissue	released	FALSE	Tumor	Unknown	Not Reported	NA	NA	0.8	34c6f392-82cd-449e-928e-16c5551faea8	0.3	1.3	No	Stage IV	0	list(days_to_treatment_end = c(NA, NA), days_to_treatment_start = c(NA, NA), treatment_id = c("2401c58e-2b35-5448-a4c7-5db762832338", "649145da-5a62-5476-abaf-02a83e577d57"), submitter_id = c("TCGA-AA-3869_treatment_1", "TCGA-AA-3869_treatment"), treatment_type = c("Pharmaceutical Therapy, NOS", "Radiation Therapy, NOS"), regimen_or_line_of_therapy = c(NA, NA), treatment_effect = c(NA, NA), thera…	not reported	Cecum	0	28062	Adenocarcinoma, NOS	no	2009	No	6th	T4	1940-03-01	N2	M1	not reported	59781278-ba80-557b-8bbb-8ce666fbdb2b	C18.0	Cecum	Not Reported	not reported	Not Reported	04216fd1-dfb5-5d7f-a39a-1ca18a1c95ea	not reported
TCGA-CK-5914-01A-11R-1653-07	TCGA-CK-5914	TCGA-CK-5914-01A	TP	Primary solid Tumor	TCGA-CK-5914-01A	1	Primary	b907ab67-7a44-42a0-a79a-beb625303104	TCGA-CK-5914	Primary Tumor	NA	Solid Tissue	released	FALSE	Tumor	Unknown	Not Reported	NA	NA	0.6	6a2276bb-99c0-4e2f-b673-3077ddb9c9d3	0.4	0.6	No	Stage IIIB	0	list(treatment_intent_type = c(NA, NA), updated_datetime = c("2019-07-31T18:28:55.830377-05:00", "2019-07-31T18:28:55.830377-05:00"), treatment_id = c("7de43578-535e-5f03-bead-cfb64c4e6253", "c9f215c0-1e90-5e97-86e9-81e8af8d5738"), submitter_id = c("TCGA-CK-5914_treatment", "TCGA-CK-5914_treatment_1"), treatment_type = c("Radiation Therapy, NOS", "Pharmaceutical Therapy, NOS"), state = c("release…	not reported	Sigmoid colon	669	29586	Adenocarcinoma, NOS	no	2008	No	6th	T3	1940-03-01	N1	MX	not reported	651d1d51-1225-5373-9443-8f287f2e2c43	C18.7	Sigmoid colon	Not Reported	not reported	Not Reported	72605264-4d36-548f-b3d7-35bdd3e16052	white
TCGA-D5-5540-01A-01R-1653-07	TCGA-D5-5540	TCGA-D5-5540-01A	TP	Primary solid Tumor	TCGA-D5-5540-01A	1	Primary	65eb6269-3250-49d1-89e3-bbee5519bd45	TCGA-D5-5540	Primary Tumor	NA	Solid Tissue	released	FALSE	Tumor	Unknown	Not Reported	NA	NA	0.5	4b0d96b0-30bd-416c-825a-349509305a6e	0.4	2	No	Stage IIA	0	list(days_to_treatment_end = c(NA, NA), days_to_treatment_start = c(NA, NA), treatment_id = c("136bf2f0-86f1-58cd-a0bb-0995b9a583f8", "fb524c97-7103-52c0-ba19-e256bd49d105"), submitter_id = c("TCGA-D5-5540_treatment_1", "TCGA-D5-5540_treatment"), treatment_type = c("Pharmaceutical Therapy, NOS", "Radiation Therapy, NOS"), regimen_or_line_of_therapy = c(NA, NA), treatment_effect = c(NA, NA), thera…	not reported	Cecum	1706	26972	Adenocarcinoma, NOS	no	2010	No	NA	T3	1940-03-01	N0	M0	not reported	691c0cb7-1028-5010-bd33-addf71df36bf	C18.0	Cecum	Not Reported	not reported	Not Reported	da939b19-34b9-5a56-a665-bfc7beda29ff	white
TCGA-CM-6172-01A-11R-1653-07	TCGA-CM-6172	TCGA-CM-6172-01A	TP	Primary solid Tumor	TCGA-CM-6172-01A	1	Primary	96ca99ae-ae8d-4325-a9b6-4c32d6cbe52c	TCGA-CM-6172	Primary Tumor	NA	Solid Tissue	released	FALSE	Tumor	Unknown	Not Reported	NA	NA	0.8	7f0ed6de-0830-4abc-a900-d1a3ab274736	0.6	1.5	No	Stage IIIB	0	list(days_to_treatment_end = c(NA, NA), days_to_treatment_start = c(NA, NA), treatment_id = c("9aeb6eed-537d-5304-8c6e-4cc286c2f857", "9b84e044-34bf-52eb-96b9-02aa03965dbc"), submitter_id = c("TCGA-CM-6172_treatment_1", "TCGA-CM-6172_treatment"), treatment_type = c("Pharmaceutical Therapy, NOS", "Radiation Therapy, NOS"), regimen_or_line_of_therapy = c(NA, NA), treatment_effect = c(NA, NA), thera…	not reported	Sigmoid colon	335	25902	Adenocarcinoma, NOS	no	2010	No	7th	T3	1940-03-01	N1a	M0	not reported	d6ef5216-b743-56ec-a13b-354f8ae7bc51	C18.7	Sigmoid colon	Not Reported	not reported	Not Reported	52a3193f-2f59-5a90-ae84-5fb8a0b51e70	white
TCGA-D5-6931-01A-11R-1928-07	TCGA-D5-6931	TCGA-D5-6931-01A	TP	Primary solid Tumor	TCGA-D5-6931-01A	1	Primary	9cfcf069-f971-476c-9084-4d62a75cb3a7	TCGA-D5-6931	Primary Tumor	NA	Solid Tissue	released	FALSE	Tumor	Unknown	Not Reported	NA	NA	1	d58ae578-e4c3-4ae4-9b5d-a7831f976ff7	0.8	1	No	Stage IIIC	0	list(days_to_treatment_end = c(NA, NA), days_to_treatment_start = c(NA, NA), treatment_id = c("21ee8add-76d7-5bd6-8723-43d01d96a4a2", "91a4fb94-c9b3-5056-8d0f-ce03aa3188b1"), submitter_id = c("TCGA-D5-6931_treatment_1", "TCGA-D5-6931_treatment"), treatment_type = c("Pharmaceutical Therapy, NOS", "Radiation Therapy, NOS"), regimen_or_line_of_therapy = c(NA, NA), treatment_effect = c(NA, NA), thera…	not reported	Colon, NOS	365	28292	Adenocarcinoma, NOS	no	2011	No	7th	T4b	1940-03-01	N2	M0	not reported	483ec054-023d-5d7f-9737-48e4fd9d713d	C18.9	Colon, NOS	Not Reported	not reported	Not Reported	7f6a9a5f-3565-5a63-81ef-e86ad9546b48	white
TCGA-CK-4948-01B-11R-1653-07	TCGA-CK-4948	TCGA-CK-4948-01B	TP	Primary solid Tumor	TCGA-CK-4948-01B	1	Primary	0ad869d1-24d5-412b-8058-154b97a65853	TCGA-CK-4948	Primary Tumor	NA	Solid Tissue	released	FALSE	Tumor	Unknown	Not Reported	NA	NA	0.4	31ba7387-df2f-4d70-b413-3734ba02438e	0.3	0.7	No	Stage III	0	list(days_to_treatment_end = c(NA, NA), days_to_treatment_start = c(NA, NA), treatment_id = c("a72cd344-9dd3-5634-b13e-d38660000bff", "c98b3214-adca-5722-bfdb-fd6dea8a8a0d"), submitter_id = c("TCGA-CK-4948_treatment_1", "TCGA-CK-4948_treatment"), treatment_type = c("Pharmaceutical Therapy, NOS", "Radiation Therapy, NOS"), regimen_or_line_of_therapy = c(NA, NA), treatment_effect = c(NA, NA), thera…	not reported	Sigmoid colon	4502	16736	Adenocarcinoma, NOS	no	2002	No	5th	T3	1940-03-01	N1	M0	not reported	36c85ac7-0c3a-549d-90f8-474cf6f47ec8	C18.7	Sigmoid colon	Not Reported	not reported	Not Reported	3fed6d37-e480-5c10-91bd-56308600301e	white
TCGA-NH-A8F7-01A-11R-A41B-07	TCGA-NH-A8F7	TCGA-NH-A8F7-01A	TP	Primary solid Tumor	TCGA-NH-A8F7-01A	1	Primary	e9ac4856-032e-401f-b3e6-54e7f796faa4	TCGA-NH-A8F7	Primary Tumor	FALSE	Solid Tissue	released	FALSE	Tumor	Unknown	Not Reported	48	290	NA	4D9A2D24-529F-4CFE-8444-013FAAF696EC	NA	NA	Yes	Stage IIA	0	list(days_to_treatment_end = c(NA, NA), days_to_treatment_start = c(NA, NA), treatment_id = c("9ecd6fbd-2362-5caa-a08d-bd869e82b5ba", "dfd5ac97-f73d-513f-9c0a-c86d31e08d3b"), submitter_id = c("TCGA-NH-A8F7_treatment_1", "TCGA-NH-A8F7_treatment"), treatment_type = c("Pharmaceutical Therapy, NOS", "Radiation Therapy, NOS"), regimen_or_line_of_therapy = c(NA, NA), treatment_effect = c(NA, NA), thera…	not reported	Sigmoid colon	543	19535	Adenocarcinoma, NOS	no	2013	No	7th	T3	1940-03-01	N0	MX	not reported	4689c168-6a0b-5c0d-bdc8-73dfbc3315ad	C18.7	Sigmoid colon	Not Reported	not reported	Not Reported	46800644-166c-58f4-aad9-b6392526af8b	black or african american
TCGA-A6-6650-01A-11R-A278-07	TCGA-A6-6650	TCGA-A6-6650-01A	TP	Primary solid Tumor	TCGA-A6-6650-01A	1	Primary	9b637a29-ee08-4ab2-8160-7584c170f87b	TCGA-A6-6650	Primary Tumor	NA	Solid Tissue	released	FALSE	Tumor	Unknown	Not Reported	NA	NA	0.8	a3bacc5b-1c12-44e2-99f6-80baa8668283	0.7	1.4	No	Stage IIA	0	list(treatment_intent_type = c(NA, NA), updated_datetime = c("2019-07-31T15:21:13.921799-05:00", "2019-07-31T15:21:13.921799-05:00"), treatment_id = c("590200f9-4fc4-57a6-af2f-64d321a9e1c5", "e8044245-1521-5b8b-8a39-6ef9e12ee1b8"), submitter_id = c("TCGA-A6-6650_treatment", "TCGA-A6-6650_treatment_1"), treatment_type = c("Radiation Therapy, NOS", "Pharmaceutical Therapy, NOS"), state = c("release…	not reported	Ascending colon	627	25516	Adenocarcinoma, NOS	no	2010	No	7th	T3	1940-03-01	N0	M0	not reported	4a27df98-2f99-51e4-a0d8-f324ed8ea8bc	C18.2	Ascending colon	Not Reported	not reported	Not Reported	2c815065-4a2b-5c7a-9872-06f8c85259fd	black or african american
TCGA-AZ-6607-01A-11R-1839-07	TCGA-AZ-6607	TCGA-AZ-6607-01A	TP	Primary solid Tumor	TCGA-AZ-6607-01A	1	Primary	22f0ccad-11a2-4a4f-81f1-8c1c324ee86a	TCGA-AZ-6607	Primary Tumor	NA	Solid Tissue	released	FALSE	Tumor	Unknown	Not Reported	NA	NA	1	2a744111-dfa5-4fa2-9eb4-20039a7c08f3	0.5	1.5	No	Stage IV	0	list(days_to_treatment_end = c(NA, NA), days_to_treatment_start = c(NA, NA), treatment_id = c("3321bc94-502e-5c60-9525-b2665af40c84", "360242c5-34cb-5a29-a87e-6c01f7565fa9"), submitter_id = c("TCGA-AZ-6607_treatment_1", "TCGA-AZ-6607_treatment"), treatment_type = c("Pharmaceutical Therapy, NOS", "Radiation Therapy, NOS"), regimen_or_line_of_therapy = c(NA, NA), treatment_effect = c(NA, NA), thera…	not reported	Sigmoid colon	NA	25448	Adenocarcinoma, NOS	no	2009	No	6th	T4	1940-03-01	N2	M1	not reported	98bfc753-a803-5500-a6d5-7849ac00af42	C18.7	Sigmoid colon	Not Reported	not reported	Not Reported	02882915-5352-50f6-b393-7ca5fe048a01	white
TCGA-CA-5796-01A-01R-1653-07	TCGA-CA-5796	TCGA-CA-5796-01A	TP	Primary solid Tumor	TCGA-CA-5796-01A	1	Primary	1a4d9d59-b0dc-4045-a832-9089d3bc1d52	TCGA-CA-5796	Primary Tumor	NA	Solid Tissue	released	FALSE	Tumor	Unknown	Not Reported	NA	NA	1.1	8e2777e5-ba8d-4b4c-9c96-15f6355f1fdd	0.6	1.3	No	Stage IIA	0	list(treatment_intent_type = c(NA, NA), updated_datetime = c("2019-07-31T18:29:55.487314-05:00", "2019-07-31T18:29:55.487314-05:00"), treatment_id = c("2179d619-94e7-5f63-a260-5a76d2bfcc38", "8b0ea12f-f1f9-5662-9933-21c1b79b432a"), submitter_id = c("TCGA-CA-5796_treatment", "TCGA-CA-5796_treatment_1"), treatment_type = c("Radiation Therapy, NOS", "Pharmaceutical Therapy, NOS"), state = c("release…	not reported	Ascending colon	377	19353	Mucinous adenocarcinoma	no	2010	No	6th	T3	1980-03-01	N0	M0	not reported	b3bb8c49-daa1-5991-b68c-8c75715ba024	C18.2	Ascending colon	Not Reported	not reported	Not Reported	7f69d9e0-2ab1-56dc-bb6a-c699f174d1f8	asian
TCGA-DM-A0X9-01A-11R-A155-07	TCGA-DM-A0X9	TCGA-DM-A0X9-01A	TP	Primary solid Tumor	TCGA-DM-A0X9-01A	1	Primary	0164c63c-d3fc-48ab-88d3-c0ab821c39c4	TCGA-DM-A0X9	Primary Tumor	FALSE	Solid Tissue	released	FALSE	Tumor	Unknown	Not Reported	3270	130	NA	F323F54C-A86A-47DB-A26D-7541CB54A08E	NA	NA	No	Stage IIA	0	list(treatment_intent_type = c(NA, NA), updated_datetime = c("2019-07-31T18:30:52.194720-05:00", "2019-07-31T18:30:52.194720-05:00"), treatment_id = c("8abe456e-66d1-52d9-9fa4-6ab2bd5435ac", "b2fcca28-87c5-5a95-8836-029ec4e68f42"), submitter_id = c("TCGA-DM-A0X9_treatment", "TCGA-DM-A0X9_treatment_1"), treatment_type = c("Radiation Therapy, NOS", "Pharmaceutical Therapy, NOS"), state = c("release…	not reported	Ascending colon	3641	26217	Adenocarcinoma, NOS	no	2001	No	NA	T3	1940-03-01	N0	M0	not reported	89cf4bb6-e3c2-5a3d-954a-b7fc6fc5128d	C18.2	Ascending colon	Not Reported	not reported	Not Reported	2412d353-e5d4-5865-9cf9-347467ff1fda	white
TCGA-A6-A56B-01A-31R-A28H-07	TCGA-A6-A56B	TCGA-A6-A56B-01A	TP	Primary solid Tumor	TCGA-A6-A56B-01A	1	Primary	4425892c-8c35-4f6c-b531-1ec510ad19d2	TCGA-A6-A56B	Primary Tumor	FALSE	Solid Tissue	released	FALSE	Tumor	Unknown	Not Reported	1497	410	NA	FEE2A033-7EE5-4528-80AF-979BD2FDCBF9	NA	NA	No	Stage IIIB	0	list(treatment_intent_type = c(NA, NA), updated_datetime = c("2019-07-31T18:30:19.067618-05:00", "2019-07-31T18:30:19.067618-05:00"), treatment_id = c("5811d5b5-3217-5048-b7c6-020108d71944", "95ffffac-3cd5-5558-86f8-ef77f83ad01c"), submitter_id = c("TCGA-A6-A56B_treatment", "TCGA-A6-A56B_treatment_1"), treatment_type = c("Radiation Therapy, NOS", "Pharmaceutical Therapy, NOS"), state = c("release…	not reported	Sigmoid colon	1595	20903	Adenocarcinoma, NOS	no	2008	No	6th	T3	1940-03-01	N1	M0	not reported	7bf4bfb7-2f7a-5a0d-97ca-bf903dacbb97	C18.7	Sigmoid colon	Not Reported	not reported	Not Reported	8e89c10c-e93e-5ec9-b6d9-f7486431ed8f	black or african american
TCGA-AA-3509-01A-01R-1410-07	TCGA-AA-3509	TCGA-AA-3509-01A	TP	Primary solid Tumor	TCGA-AA-3509-01A	1	Primary	ba6e3333-3651-450e-a6ea-4e47cf0d18bf	TCGA-AA-3509	Primary Tumor	NA	Solid Tissue	released	FALSE	Tumor	Unknown	Not Reported	NA	NA	0.5	82c6ff26-495d-4e6a-b00c-cd4ce99e55d1	0.3	0.7	No	Stage II	0	list(treatment_intent_type = c(NA, NA), updated_datetime = c("2019-07-31T18:31:33.802067-05:00", "2019-07-31T18:31:33.802067-05:00"), treatment_id = c("5d6c842e-da70-5cda-b402-1e4cef3c9a85", "bab3b131-bcf9-5130-9a0f-2bdc93c54d7a"), submitter_id = c("TCGA-AA-3509_treatment", "TCGA-AA-3509_treatment_1"), treatment_type = c("Radiation Therapy, NOS", "Pharmaceutical Therapy, NOS"), state = c("release…	not reported	Sigmoid colon	1915	19786	Adenocarcinoma, NOS	no	2005	No	5th	T3	1940-03-01	N0	M0	not reported	234d2c11-c8e3-5ffa-908d-866aef718339	C18.7	Sigmoid colon	Not Reported	not reported	Not Reported	21b45f5d-a21e-529f-ac88-1cda7f1eb387	not reported
TCGA-CK-6747-01A-11R-1839-07	TCGA-CK-6747	TCGA-CK-6747-01A	TP	Primary solid Tumor	TCGA-CK-6747-01A	1	Primary	bfdf3d03-51aa-41eb-93bf-d39ff501a824	TCGA-CK-6747	Primary Tumor	NA	Solid Tissue	released	FALSE	Tumor	Unknown	Not Reported	NA	NA	0.4	b0a2f381-be07-4bf8-a54f-0da67b128895	0.3	0.7	No	Stage IIA	0	list(treatment_intent_type = c(NA, NA), updated_datetime = c("2019-07-31T18:30:45.769599-05:00", "2019-07-31T18:30:45.769599-05:00"), treatment_id = c("757acc2f-3b62-5abb-9b0d-ef4330b40092", "dc0b3370-3bc7-5152-a509-85c8379ac038"), submitter_id = c("TCGA-CK-6747_treatment", "TCGA-CK-6747_treatment_1"), treatment_type = c("Radiation Therapy, NOS", "Pharmaceutical Therapy, NOS"), state = c("release…	not reported	Cecum	820	32052	Adenocarcinoma, NOS	no	2008	No	6th	T3	1940-03-01	N0	MX	not reported	cc52e6fe-e12f-594c-a588-cec6da6859c5	C18.0	Cecum	Not Reported	not reported	Not Reported	321995d2-d8fc-55e8-8f9c-b4a6fe634e4c	white
TCGA-AA-3941-01A-01R-1022-07	TCGA-AA-3941	TCGA-AA-3941-01A	TP	Primary solid Tumor	TCGA-AA-3941-01A	1	Primary	eee77960-898b-4e4b-926a-d6782fa9ed83	TCGA-AA-3941	Primary Tumor	NA	Solid Tissue	released	FALSE	Tumor	Unknown	Not Reported	NA	NA	0.5	3360f9bc-c4d0-45fa-b6c4-26182adb7f5f	0.2	0.7	No	Stage IVA	0	list(treatment_intent_type = c(NA, NA), updated_datetime = c("2019-07-31T18:31:43.058452-05:00", "2019-07-31T18:31:43.058452-05:00"), treatment_id = c("0a5169f6-1369-54bb-a9d3-d9ae47428423", "b9fb7567-5254-5a3b-a352-997435e6ee7e"), submitter_id = c("TCGA-AA-3941_treatment", "TCGA-AA-3941_treatment_1"), treatment_type = c("Radiation Therapy, NOS", "Pharmaceutical Therapy, NOS"), state = c("release…	not reported	Colon, NOS	730	31015	Adenocarcinoma, NOS	no	2010	No	7th	T4	1940-03-01	N1b	M1a	not reported	b5c63aae-bc1d-5b49-ae43-4c43198a4641	C18.9	Colon, NOS	Not Reported	not reported	Not Reported	88ce386c-5f4b-5f73-ad19-b3530f9a6ed5	not reported
TCGA-A6-3809-01B-04R-A277-07	TCGA-A6-3809	TCGA-A6-3809-01B	TP	Primary solid Tumor	TCGA-A6-3809-01B	1	Primary	c3c7289b-4854-4231-bd0f-952a7b05db8c	TCGA-A6-3809	Primary Tumor	FALSE	Solid Tissue	released	TRUE	Tumor	FFPE	Not Reported	720	NA	NA	b4d15a05-bc09-4ddb-b35b-13798747fecc	NA	NA	No	Stage IIB	0	list(treatment_intent_type = c(NA, NA), updated_datetime = c("2019-07-31T15:16:33.683794-05:00", "2019-07-31T15:16:33.683794-05:00"), treatment_id = c("da596f20-aed9-5dbb-80d3-4b9aa0ae7528", "ed1ff32a-fd9a-542a-857a-1aa8573bd1d2"), submitter_id = c("TCGA-A6-3809_treatment", "TCGA-A6-3809_treatment_1"), treatment_type = c("Radiation Therapy, NOS", "Pharmaceutical Therapy, NOS"), state = c("release…	not reported	Colon, NOS	996	26274	Mucinous adenocarcinoma	no	2009	No	6th	T4	1980-03-01	N0	M0	not reported	120822c3-8829-56ac-a714-8c78f092698c	C18.9	Colon, NOS	Not Reported	not reported	Not Reported	6c858ca4-41cf-5b83-bb0e-445746e621da	white
TCGA-AA-3502-01A-01R-1410-07	TCGA-AA-3502	TCGA-AA-3502-01A	TP	Primary solid Tumor	TCGA-AA-3502-01A	1	Primary	01680b41-4718-4b82-80a7-851ff5518151	TCGA-AA-3502	Primary Tumor	NA	Solid Tissue	released	FALSE	Tumor	Unknown	Not Reported	NA	NA	0.9	dd52c1f9-7093-45b8-9c5a-2dedb13e766f	0.9	1	No	Stage I	0	list(days_to_treatment_end = c(NA, NA), days_to_treatment_start = c(NA, NA), treatment_id = c("0e938c7a-b219-5baf-a48f-03debf5de4c0", "1af39fb9-f38d-5d91-a310-84b8ff18e8c2"), submitter_id = c("TCGA-AA-3502_treatment_1", "TCGA-AA-3502_treatment"), treatment_type = c("Pharmaceutical Therapy, NOS", "Radiation Therapy, NOS"), regimen_or_line_of_therapy = c(NA, NA), treatment_effect = c(NA, NA), thera…	not reported	Colon, NOS	1065	26724	Adenocarcinoma, NOS	no	2003	No	5th	T2	1940-03-01	N0	M0	not reported	ab4301d9-1fa8-5d79-8ae0-cb94b90d7828	C18.9	Colon, NOS	Not Reported	not reported	Not Reported	a8830950-73c1-53ae-b189-41fb2eece0a2	not reported
TCGA-A6-3809-01A-01R-1022-07	TCGA-A6-3809	TCGA-A6-3809-01A	TP	Primary solid Tumor	TCGA-A6-3809-01A	1	Primary	2b12e104-94f6-4945-a50f-d00ef9514748	TCGA-A6-3809	Primary Tumor	NA	Solid Tissue	released	FALSE	Tumor	Unknown	Not Reported	NA	NA	0.8	b4d15a05-bc09-4ddb-b35b-13798747fecc	0.4	0.8	No	Stage IIB	0	list(treatment_intent_type = c(NA, NA), updated_datetime = c("2019-07-31T15:16:33.683794-05:00", "2019-07-31T15:16:33.683794-05:00"), treatment_id = c("da596f20-aed9-5dbb-80d3-4b9aa0ae7528", "ed1ff32a-fd9a-542a-857a-1aa8573bd1d2"), submitter_id = c("TCGA-A6-3809_treatment", "TCGA-A6-3809_treatment_1"), treatment_type = c("Radiation Therapy, NOS", "Pharmaceutical Therapy, NOS"), state = c("release…	not reported	Colon, NOS	996	26274	Mucinous adenocarcinoma	no	2009	No	6th	T4	1980-03-01	N0	M0	not reported	120822c3-8829-56ac-a714-8c78f092698c	C18.9	Colon, NOS	Not Reported	not reported	Not Reported	6c858ca4-41cf-5b83-bb0e-445746e621da	white
TCGA-AZ-6605-01A-11R-1839-07	TCGA-AZ-6605	TCGA-AZ-6605-01A	TP	Primary solid Tumor	TCGA-AZ-6605-01A	1	Primary	c95acbd6-8dd8-49f7-8c0e-8c2aa4f3a72c	TCGA-AZ-6605	Primary Tumor	NA	Solid Tissue	released	FALSE	Tumor	Unknown	Not Reported	NA	NA	0.6	48827545-d4c3-42d1-9154-34e299a21ea8	0.2	1	No	Stage IIIB	0	list(treatment_intent_type = c(NA, NA), updated_datetime = c("2019-07-31T18:31:48.834673-05:00", "2019-07-31T18:31:48.834673-05:00"), treatment_id = c("366973aa-5847-502b-88d3-56ecded026ec", "e232ed5b-89ce-55c3-8c8d-afb4f6ef11ea"), submitter_id = c("TCGA-AZ-6605_treatment", "TCGA-AZ-6605_treatment_1"), treatment_type = c("Radiation Therapy, NOS", "Pharmaceutical Therapy, NOS"), state = c("release…	not reported	Ascending colon	NA	28485	Adenocarcinoma, NOS	no	2008	No	6th	T4	1940-03-01	N1	M0	not reported	19091e01-a122-53be-8a0b-ea9624523ced	C18.2	Ascending colon	Not Reported	not reported	Not Reported	4ef55fd7-f9aa-570b-ab74-fe31b769f6cb	white
TCGA-A6-3809-01A-01R-A278-07	TCGA-A6-3809	TCGA-A6-3809-01A	TP	Primary solid Tumor	TCGA-A6-3809-01A	1	Primary	2b12e104-94f6-4945-a50f-d00ef9514748	TCGA-A6-3809	Primary Tumor	NA	Solid Tissue	released	FALSE	Tumor	Unknown	Not Reported	NA	NA	0.8	b4d15a05-bc09-4ddb-b35b-13798747fecc	0.4	0.8	No	Stage IIB	0	list(treatment_intent_type = c(NA, NA), updated_datetime = c("2019-07-31T15:16:33.683794-05:00", "2019-07-31T15:16:33.683794-05:00"), treatment_id = c("da596f20-aed9-5dbb-80d3-4b9aa0ae7528", "ed1ff32a-fd9a-542a-857a-1aa8573bd1d2"), submitter_id = c("TCGA-A6-3809_treatment", "TCGA-A6-3809_treatment_1"), treatment_type = c("Radiation Therapy, NOS", "Pharmaceutical Therapy, NOS"), state = c("release…	not reported	Colon, NOS	996	26274	Mucinous adenocarcinoma	no	2009	No	6th	T4	1980-03-01	N0	M0	not reported	120822c3-8829-56ac-a714-8c78f092698c	C18.9	Colon, NOS	Not Reported	not reported	Not Reported	6c858ca4-41cf-5b83-bb0e-445746e621da	white
TCGA-AA-A01I-01A-02R-A089-07	TCGA-AA-A01I	TCGA-AA-A01I-01A	TP	Primary solid Tumor	TCGA-AA-A01I-01A	1	Primary	fba03796-b9c8-4042-9720-f21660cfec28	TCGA-AA-A01I	Primary Tumor	FALSE	Solid Tissue	released	FALSE	Tumor	Unknown	Not Reported	173	220	NA	51A15A40-E611-49C3-AB69-638871664D86	NA	NA	No	Stage I	0	list(days_to_treatment_end = c(NA, NA), days_to_treatment_start = c(NA, NA), treatment_id = c("d17654d0-9d75-5673-8998-ccfdebd8e692", "e8e7476c-a9b6-5dab-b95a-b3c843a2c0eb"), submitter_id = c("TCGA-AA-A01I_treatment_1", "TCGA-AA-A01I_treatment"), treatment_type = c("Pharmaceutical Therapy, NOS", "Radiation Therapy, NOS"), regimen_or_line_of_therapy = c(NA, NA), treatment_effect = c(NA, NA), thera…	not reported	Sigmoid colon	943	27759	Adenocarcinoma, NOS	no	2009	No	6th	T2	1940-03-01	N0	M0	not reported	48944367-bc4c-53e6-8f72-85751945dd86	C18.7	Sigmoid colon	Not Reported	not reported	Not Reported	3df157af-1131-53f4-99e3-28ce14ce7df7	not reported
TCGA-CM-5861-01A-01R-1653-07	TCGA-CM-5861	TCGA-CM-5861-01A	TP	Primary solid Tumor	TCGA-CM-5861-01A	1	Primary	e4ebbf6d-9374-4d8d-90a8-75cc4c7baeda	TCGA-CM-5861	Primary Tumor	NA	Solid Tissue	released	FALSE	Tumor	Unknown	Not Reported	NA	NA	1.5	ae1ec4f2-2522-4318-9403-1471f2fab424	0.5	2	No	Stage IIA	0	list(treatment_intent_type = c(NA, NA), updated_datetime = c("2019-07-31T18:33:08.112577-05:00", "2019-07-31T18:33:08.112577-05:00"), treatment_id = c("561a77ca-e6f5-562d-9ae4-ef8e045ad62a", "78b9392d-553b-5747-8b63-d0c97f58fb8b"), submitter_id = c("TCGA-CM-5861_treatment", "TCGA-CM-5861_treatment_1"), treatment_type = c("Radiation Therapy, NOS", "Pharmaceutical Therapy, NOS"), state = c("release…	not reported	Cecum	457	23253	Adenocarcinoma, NOS	no	2010	No	7th	T3	1940-03-01	N0	M0	not reported	c3846a84-f31b-5a11-b520-b347b8ddbe6a	C18.0	Cecum	Not Reported	not reported	Not Reported	6259ca30-0730-5bc6-bcaa-8d3ad2aa7d5a	white
TCGA-CA-6719-01A-11R-1839-07	TCGA-CA-6719	TCGA-CA-6719-01A	TP	Primary solid Tumor	TCGA-CA-6719-01A	1	Primary	732077b5-97b2-44ab-aac9-1ae94fd04887	TCGA-CA-6719	Primary Tumor	NA	Solid Tissue	released	FALSE	Tumor	Unknown	Not Reported	NA	NA	0.7	833d9186-0e43-498f-a698-927a968de5a1	0.5	1.2	No	Stage IIA	0	list(days_to_treatment_end = c(NA, NA), days_to_treatment_start = c(NA, NA), treatment_id = c("45fea666-89bb-59cf-9d6d-82ef5a2f18f8", "ef32fd62-f336-5932-8d5f-a79d6c7a325a"), submitter_id = c("TCGA-CA-6719_treatment_1", "TCGA-CA-6719_treatment"), treatment_type = c("Pharmaceutical Therapy, NOS", "Radiation Therapy, NOS"), regimen_or_line_of_therapy = c(NA, NA), treatment_effect = c(NA, NA), thera…	not reported	Descending colon	435	28343	Adenocarcinoma, NOS	no	2011	No	6th	T3	1940-03-01	N0	M0	not reported	97374a3c-5848-52fd-812a-06a41def4da6	C18.6	Descending colon	Not Reported	not reported	Not Reported	b6a8bcda-0c2f-5eca-890b-6fd3d3da7500	asian
TCGA-CK-6748-01A-11R-1839-07	TCGA-CK-6748	TCGA-CK-6748-01A	TP	Primary solid Tumor	TCGA-CK-6748-01A	1	Primary	f69e80aa-237d-4e75-8d04-7c1b5ae9007b	TCGA-CK-6748	Primary Tumor	NA	Solid Tissue	released	FALSE	Tumor	Unknown	Not Reported	NA	NA	0.4	d8e78b5e-6e61-413a-b518-a8b77b986e86	0.3	0.7	No	Stage IV	0	list(days_to_treatment_end = c(NA, NA), days_to_treatment_start = c(NA, NA), treatment_id = c("8227691c-65bb-5068-b33c-48223ee866bd", "e6a0746c-98fd-560b-a671-701f509b4cf5"), submitter_id = c("TCGA-CK-6748_treatment_1", "TCGA-CK-6748_treatment"), treatment_type = c("Pharmaceutical Therapy, NOS", "Radiation Therapy, NOS"), regimen_or_line_of_therapy = c(NA, NA), treatment_effect = c(NA, NA), thera…	not reported	Sigmoid colon	61	16529	Mucinous adenocarcinoma	no	2008	No	6th	T3	1980-03-01	N1	M1	not reported	f8151f1c-30b3-50db-b15a-84125aab16a8	C18.7	Sigmoid colon	Not Reported	not reported	Not Reported	7dc626a7-12aa-536c-be5f-66be005e44e1	white
TCGA-NH-A50U-01A-33R-A37K-07	TCGA-NH-A50U	TCGA-NH-A50U-01A	TP	Primary solid Tumor	TCGA-NH-A50U-01A	1	Primary	289f0934-51f9-4f35-a7d1-c193142e794d	TCGA-NH-A50U	Primary Tumor	FALSE	Solid Tissue	released	FALSE	Tumor	Unknown	Not Reported	22	610	NA	ECEF5C94-4177-48A5-BB03-AA57BA9058A6	NA	NA	No	Stage IVA	0	list(treatment_intent_type = c(NA, NA), updated_datetime = c("2019-07-31T15:14:01.678414-05:00", "2019-07-31T15:14:01.678414-05:00"), treatment_id = c("1246afb1-5282-5ad3-a6ca-84b544bd4903", "9a0de30f-578f-54ee-b41b-9681dabb8be9"), submitter_id = c("TCGA-NH-A50U_treatment", "TCGA-NH-A50U_treatment_1"), treatment_type = c("Radiation Therapy, NOS", "Pharmaceutical Therapy, NOS"), state = c("release…	not reported	Cecum	NA	15450	Mucinous adenocarcinoma	no	2012	No	7th	T4a	1980-03-01	N0	M1a	not reported	5b8b4f4e-06c3-5338-a459-efb975b8274e	C18.0	Cecum	Not Reported	not reported	Not Reported	12627256-3958-57e7-8ff7-959f34fc16c6	black or african american
TCGA-F4-6459-01A-11R-1774-07	TCGA-F4-6459	TCGA-F4-6459-01A	TP	Primary solid Tumor	TCGA-F4-6459-01A	1	Primary	df80b5ed-3ce8-4b06-978e-f972f659d206	TCGA-F4-6459	Primary Tumor	NA	Solid Tissue	released	FALSE	Tumor	Unknown	Not Reported	NA	NA	2.5	d0f0eef4-bc4d-47e6-a4b6-c0f5d48c6203	0.4	3	No	Stage IIIB	0	list(treatment_intent_type = c(NA, NA), updated_datetime = c("2019-07-31T18:33:32.147903-05:00", "2019-07-31T18:33:32.147903-05:00"), treatment_id = c("1f72490f-e845-564e-8bc6-361b27094be3", "b6ee9731-024c-5ffd-9d55-0dfb6a42af3e"), submitter_id = c("TCGA-F4-6459_treatment", "TCGA-F4-6459_treatment_1"), treatment_type = c("Radiation Therapy, NOS", "Pharmaceutical Therapy, NOS"), state = c("release…	not reported	Sigmoid colon	0	22574	Adenocarcinoma, NOS	no	2011	No	7th	T3	1940-03-01	N2a	M0	not reported	fc99d55d-25f4-5360-ac2f-9d3ca192a6dd	C18.7	Sigmoid colon	Not Reported	not reported	Not Reported	0841cd81-f5f4-5cd0-8857-353eb3a27757	white
TCGA-5M-AATA-01A-31R-A41B-07	TCGA-5M-AATA	TCGA-5M-AATA-01A	TP	Primary solid Tumor	TCGA-5M-AATA-01A	1	Primary	41811365-ecd2-4729-be59-d734763a9892	TCGA-5M-AATA	Primary Tumor	FALSE	Solid Tissue	released	FALSE	Tumor	Unknown	Not Reported	NA	210	NA	9EC72159-5123-48AD-BBBC-DF2F1B6FAF3D	NA	NA	NA	NA	NA	NULL	NA	NA	NA	NA	NA	NA	NA	NA	NA	NA	NA	NA	NA	NA	NA	NA	NA	NA	NA	NA	NA	NA
TCGA-AA-3696-01A-01R-0905-07	TCGA-AA-3696	TCGA-AA-3696-01A	TP	Primary solid Tumor	TCGA-AA-3696-01A	1	Primary	1e7873ce-88c4-44c2-9f8a-aeeae8c98edf	TCGA-AA-3696	Primary Tumor	NA	Solid Tissue	released	FALSE	Tumor	Unknown	Not Reported	NA	NA	0.7	5356d8ab-d569-41af-bd68-4378154d3ae7	0.4	1	No	Stage IV	0	list(days_to_treatment_end = c(NA, NA), days_to_treatment_start = c(NA, NA), treatment_id = c("a2394de9-8e05-5865-8c2c-a36fc3f16734", "f89c667e-7841-5cb3-b5c5-942794960d14"), submitter_id = c("TCGA-AA-3696_treatment_1", "TCGA-AA-3696_treatment"), treatment_type = c("Pharmaceutical Therapy, NOS", "Radiation Therapy, NOS"), regimen_or_line_of_therapy = c(NA, NA), treatment_effect = c(NA, NA), thera…	not reported	Sigmoid colon	0	27667	Adenocarcinoma, NOS	no	2009	No	6th	T3	1940-03-01	N1	M1	not reported	f771ee6f-f86e-5026-9f0c-8c7dfca1d897	C18.7	Sigmoid colon	Not Reported	not reported	Not Reported	46874036-a07f-583e-acde-bf83ebe1656a	not reported
TCGA-AA-3489-01A-21R-1839-07	TCGA-AA-3489	TCGA-AA-3489-01A	TP	Primary solid Tumor	TCGA-AA-3489-01A	1	Primary	52b17bb5-0476-4d64-9865-c01309b58144	TCGA-AA-3489	Primary Tumor	NA	Solid Tissue	released	FALSE	Tumor	Unknown	Not Reported	NA	NA	0.9	fcc3f802-40c7-4bcb-9f32-49bb1bbb7bb2	0.5	1	No	Stage II	0	list(treatment_intent_type = c(NA, NA), updated_datetime = c("2019-07-31T18:42:40.257002-05:00", "2019-07-31T18:42:40.257002-05:00"), treatment_id = c("50976603-643a-5cd0-95fc-f9efad4c46c2", "7498be12-6fdd-5035-a6d0-fc13093725cd"), submitter_id = c("TCGA-AA-3489_treatment", "TCGA-AA-3489_treatment_1"), treatment_type = c("Radiation Therapy, NOS", "Pharmaceutical Therapy, NOS"), state = c("release…	not reported	Colon, NOS	31	27606	Adenocarcinoma, NOS	no	2002	No	5th	T3	1940-03-01	N0	M0	not reported	3dffb61a-79ee-56bd-a441-5c48acb6c95a	C18.9	Colon, NOS	Not Reported	not reported	Not Reported	a1a470f7-f20f-56af-8281-ce7bdd061b76	not reported
TCGA-CM-6677-01A-11R-1839-07	TCGA-CM-6677	TCGA-CM-6677-01A	TP	Primary solid Tumor	TCGA-CM-6677-01A	1	Primary	44e7b873-77d5-463c-91d2-cea206ee4391	TCGA-CM-6677	Primary Tumor	NA	Solid Tissue	released	FALSE	Tumor	Unknown	Not Reported	NA	NA	1	35f4ea93-223a-46f7-a6a9-bc69646b313b	0.3	2	No	Stage IIA	0	list(days_to_treatment_end = c(NA, NA), days_to_treatment_start = c(NA, NA), treatment_id = c("2c19d68a-c5dc-5095-8b4a-94fa5063652c", "de7f0658-fee2-5d84-928c-99374ecbb1d2"), submitter_id = c("TCGA-CM-6677_treatment_1", "TCGA-CM-6677_treatment"), treatment_type = c("Pharmaceutical Therapy, NOS", "Radiation Therapy, NOS"), regimen_or_line_of_therapy = c(NA, NA), treatment_effect = c(NA, NA), thera…	not reported	Hepatic flexure of colon	337	27575	Adenocarcinoma, NOS	no	2011	No	7th	T3	1940-03-01	N0	M0	not reported	0ab21d0f-b93e-5547-8adc-83fb0015fc47	C18.3	Hepatic flexure of colon	Not Reported	not reported	Not Reported	3e616c3f-4836-5041-9508-e57b97618cf7	white
TCGA-AZ-6598-11A-01R-1774-07	TCGA-AZ-6598	TCGA-AZ-6598-11A	NT	Solid Tissue Normal	TCGA-AZ-6598-11A	11	Not Applicable	456cc2df-f9a7-4f65-8450-a79ed69fa27f	TCGA-AZ-6598	Solid Tissue Normal	NA	Solid Tissue	released	FALSE	Normal	Unknown	Not Reported	NA	NA	1.1	NA	0.4	2.2	No	Stage II	0	list(treatment_intent_type = c(NA, NA), updated_datetime = c("2019-07-31T18:34:05.456227-05:00", "2019-07-31T18:34:05.456227-05:00"), treatment_id = c("36e9647c-3a5d-5bb7-9ae9-fa5fde2ce4fe", "a39db71d-2e72-5d84-b60c-792d6d5a2ebe"), submitter_id = c("TCGA-AZ-6598_treatment", "TCGA-AZ-6598_treatment_1"), treatment_type = c("Radiation Therapy, NOS", "Pharmaceutical Therapy, NOS"), state = c("release…	not reported	Ascending colon	NA	28182	Adenocarcinoma, NOS	no	2000	No	5th	T3	1940-03-01	N0	MX	not reported	9296de96-7ae4-51eb-a98f-e1f19b60abe0	C18.2	Ascending colon	Not Reported	not reported	Not Reported	efaa7d04-d448-51c2-a68c-f7570d817649	white
TCGA-AZ-5407-01A-01R-1723-07	TCGA-AZ-5407	TCGA-AZ-5407-01A	TP	Primary solid Tumor	TCGA-AZ-5407-01A	1	Primary	faed408c-c7f8-4a40-b7ab-7713129c1211	TCGA-AZ-5407	Primary Tumor	NA	Solid Tissue	released	FALSE	Tumor	Unknown	Not Reported	NA	NA	0.9	6c27f8b9-9e3c-4665-a176-a4679eed1fa9	0.3	2.1	No	Stage I	0	list(treatment_intent_type = c(NA, NA), updated_datetime = c("2019-07-31T18:35:17.813588-05:00", "2019-07-31T18:35:17.813588-05:00"), treatment_id = c("1f33c4e0-4116-5c94-ae27-eada87d475ab", "cf6ad9a1-2fb7-5ed7-85a5-94425732ebd3"), submitter_id = c("TCGA-AZ-5407_treatment", "TCGA-AZ-5407_treatment_1"), treatment_type = c("Radiation Therapy, NOS", "Pharmaceutical Therapy, NOS"), state = c("release…	not reported	Cecum	2683	18820	Adenocarcinoma, NOS	no	2007	No	6th	T1	1940-03-01	N0	M0	not reported	8180f36e-bb8c-58dd-b1a9-853442e9a9da	C18.0	Cecum	Not Reported	not reported	Not Reported	9695199b-c7c0-5723-8b1e-f08db3ece9c3	white
TCGA-AA-3517-01A-01R-0821-07	TCGA-AA-3517	TCGA-AA-3517-01A	TP	Primary solid Tumor	TCGA-AA-3517-01A	1	Primary	ca4388c7-69e7-42b4-81c8-48b8863264c1	TCGA-AA-3517	Primary Tumor	NA	Solid Tissue	released	FALSE	Tumor	Unknown	Not Reported	NA	NA	0.5	de7970c3-c467-4b73-9235-74f654c3f66c	0.5	0.5	No	Stage IIA	0	list(days_to_treatment_end = c(NA, NA), days_to_treatment_start = c(NA, NA), treatment_id = c("9313ab45-9e47-58a2-a91d-ccb97b152c1f", "fa280838-9dff-5f29-860d-ca8f1b786a17"), submitter_id = c("TCGA-AA-3517_treatment_1", "TCGA-AA-3517_treatment"), treatment_type = c("Pharmaceutical Therapy, NOS", "Radiation Therapy, NOS"), regimen_or_line_of_therapy = c(NA, NA), treatment_effect = c(NA, NA), thera…	not reported	Colon, NOS	1186	22099	Adenocarcinoma, NOS	no	2007	No	6th	T3	1940-03-01	N0	M0	not reported	47071a01-feef-5cea-bf23-447eac5ca7f3	C18.9	Colon, NOS	Not Reported	not reported	Not Reported	a7d0bd3c-a349-56c0-8c8b-0a1c4dd8894e	not reported
TCGA-AA-3517-11A-01R-A32Z-07	TCGA-AA-3517	TCGA-AA-3517-11A	NT	Solid Tissue Normal	TCGA-AA-3517-11A	11	Not Applicable	d66e8ea3-e229-4809-aa7b-bbe7a8aeb3fe	TCGA-AA-3517	Solid Tissue Normal	NA	Solid Tissue	released	FALSE	Normal	Unknown	Not Reported	NA	NA	0.9	NA	0.3	1.8	No	Stage IIA	0	list(days_to_treatment_end = c(NA, NA), days_to_treatment_start = c(NA, NA), treatment_id = c("9313ab45-9e47-58a2-a91d-ccb97b152c1f", "fa280838-9dff-5f29-860d-ca8f1b786a17"), submitter_id = c("TCGA-AA-3517_treatment_1", "TCGA-AA-3517_treatment"), treatment_type = c("Pharmaceutical Therapy, NOS", "Radiation Therapy, NOS"), regimen_or_line_of_therapy = c(NA, NA), treatment_effect = c(NA, NA), thera…	not reported	Colon, NOS	1186	22099	Adenocarcinoma, NOS	no	2007	No	6th	T3	1940-03-01	N0	M0	not reported	47071a01-feef-5cea-bf23-447eac5ca7f3	C18.9	Colon, NOS	Not Reported	not reported	Not Reported	a7d0bd3c-a349-56c0-8c8b-0a1c4dd8894e	not reported
TCGA-AA-A01Z-01A-11R-A083-07	TCGA-AA-A01Z	TCGA-AA-A01Z-01A	TP	Primary solid Tumor	TCGA-AA-A01Z-01A	1	Primary	9ca7e5df-f832-435f-842e-4be86c01a554	TCGA-AA-A01Z	Primary Tumor	FALSE	Solid Tissue	released	FALSE	Tumor	Unknown	Not Reported	1877	210	NA	E8C798B9-30E0-40B0-93B3-49ABD6E7F29A	NA	NA	No	Stage II	0	list(treatment_intent_type = c(NA, NA), updated_datetime = c("2019-07-31T18:37:03.644247-05:00", "2019-07-31T18:37:03.644247-05:00"), treatment_id = c("4cb751c6-4787-5a24-a0f5-66ecd8278e62", "8beabb1a-45f3-5430-83b2-043812193ce8"), submitter_id = c("TCGA-AA-A01Z_treatment", "TCGA-AA-A01Z_treatment_1"), treatment_type = c("Radiation Therapy, NOS", "Pharmaceutical Therapy, NOS"), state = c("release…	not reported	Ascending colon	1126	24990	Adenocarcinoma, NOS	no	2004	No	5th	T3	1940-03-01	N0	M0	not reported	76e1b134-dab1-5374-9de6-67c1ee3951d7	C18.2	Ascending colon	Not Reported	not reported	Not Reported	c698b57c-7751-5b4f-ab90-269ec518e422	not reported
TCGA-AA-3518-01A-02R-0826-07	TCGA-AA-3518	TCGA-AA-3518-01A	TP	Primary solid Tumor	TCGA-AA-3518-01A	1	Primary	bc08b757-ed0a-44c0-88cd-85496bb72a75	TCGA-AA-3518	Primary Tumor	NA	Solid Tissue	released	FALSE	Tumor	Unknown	Not Reported	NA	NA	0.9	da1e7681-76e1-456f-b8d1-ed08c844c122	0.6	1.2	No	Stage IIA	0	list(treatment_intent_type = c(NA, NA), updated_datetime = c("2019-07-31T18:36:28.849236-05:00", "2019-07-31T18:36:28.849236-05:00"), treatment_id = c("88e4ad58-0d68-5d69-a1da-8f8f91d1b71c", "acffe9cb-84ce-5ecc-af1d-5f1f85f3ab91"), submitter_id = c("TCGA-AA-3518_treatment", "TCGA-AA-3518_treatment_1"), treatment_type = c("Radiation Therapy, NOS", "Pharmaceutical Therapy, NOS"), state = c("release…	not reported	Cecum	31	29769	Adenocarcinoma, NOS	no	2007	No	6th	T3	1940-03-01	N0	M0	not reported	5016de54-86e5-5fce-bd1a-791e378036ce	C18.0	Cecum	Not Reported	not reported	Not Reported	07d7f0eb-a8b2-5fe0-b0e5-23767413743a	not reported
TCGA-NH-A50V-01A-11R-A28H-07	TCGA-NH-A50V	TCGA-NH-A50V-01A	TP	Primary solid Tumor	TCGA-NH-A50V-01A	1	Primary	a7a71b11-5e34-49a4-8d54-be27d9c8daf0	TCGA-NH-A50V	Primary Tumor	FALSE	Solid Tissue	released	FALSE	Tumor	Unknown	Not Reported	41	520	NA	A745029F-98FE-44AA-8006-A06CEB09F560	NA	NA	No	Stage IIIB	0	list(days_to_treatment_end = c(NA, NA), days_to_treatment_start = c(NA, NA), treatment_id = c("1d630841-4912-5ae0-9cef-a1a5dd9bc204", "3730e4aa-bfcb-5708-84de-ede6d1f5cc79"), submitter_id = c("TCGA-NH-A50V_treatment_1", "TCGA-NH-A50V_treatment"), treatment_type = c("Pharmaceutical Therapy, NOS", "Radiation Therapy, NOS"), regimen_or_line_of_therapy = c(NA, NA), treatment_effect = c(NA, NA), thera…	not reported	Cecum	588	25467	Adenocarcinoma, NOS	no	2012	No	7th	T3	1940-03-01	N2a	M0	not reported	4326b129-c829-5fb3-9cbc-30bca6aaccac	C18.0	Cecum	Not Reported	not reported	Not Reported	9fe85d51-f475-538c-bfc7-7d60ca4442cd	black or african american
TCGA-AA-3968-01A-01R-1022-07	TCGA-AA-3968	TCGA-AA-3968-01A	TP	Primary solid Tumor	TCGA-AA-3968-01A	1	Primary	e950bc59-116f-4366-8524-f0731b1c9a3d	TCGA-AA-3968	Primary Tumor	NA	Solid Tissue	released	FALSE	Tumor	Unknown	Not Reported	NA	NA	0.6	4a17bb93-6880-4bea-803b-a82fa1b5a9a4	0.3	0.8	No	Stage I	0	list(treatment_intent_type = c(NA, NA), updated_datetime = c("2019-07-31T18:37:10.479680-05:00", "2019-07-31T18:37:10.479680-05:00"), treatment_id = c("10a66636-d17e-5f3e-8b13-327c1eeedbfa", "53c453d9-ba47-5e1f-a89d-04bb6078c8b0"), submitter_id = c("TCGA-AA-3968_treatment", "TCGA-AA-3968_treatment_1"), treatment_type = c("Radiation Therapy, NOS", "Pharmaceutical Therapy, NOS"), state = c("release…	not reported	Sigmoid colon	669	20089	Adenocarcinoma, NOS	no	2008	No	6th	T2	1940-03-01	N0	M0	not reported	102347b7-6298-5aed-a441-fe7d02f4ad61	C18.7	Sigmoid colon	Not Reported	not reported	Not Reported	db783e1f-5a1d-514f-9c6d-72706a0933a4	not reported
TCGA-CM-6167-01A-11R-1653-07	TCGA-CM-6167	TCGA-CM-6167-01A	TP	Primary solid Tumor	TCGA-CM-6167-01A	1	Primary	e29a1283-3e22-41f6-bc76-bfb244a044ae	TCGA-CM-6167	Primary Tumor	NA	Solid Tissue	released	FALSE	Tumor	Unknown	Not Reported	NA	NA	1.2	8a5176da-e133-4647-b2bb-30285b8bbeab	0.5	2	No	Stage IIIC	0	list(days_to_treatment_end = c(NA, NA), days_to_treatment_start = c(NA, NA), treatment_id = c("1bae18f5-099b-5c9b-8c6d-0f22856bf178", "bfc764f3-e1d1-5962-88c7-93600d050509"), submitter_id = c("TCGA-CM-6167_treatment_1", "TCGA-CM-6167_treatment"), treatment_type = c("Pharmaceutical Therapy, NOS", "Radiation Therapy, NOS"), regimen_or_line_of_therapy = c(NA, NA), treatment_effect = c(NA, NA), thera…	not reported	Cecum	456	21031	Adenocarcinoma, NOS	no	2010	No	7th	T3	1940-03-01	N2b	M0	not reported	73e45c2a-67c3-5225-bdfc-d7ed8298dbc3	C18.0	Cecum	Not Reported	not reported	Not Reported	8daf15dc-65f9-5a04-8c7b-cd44b1b34e20	black or african american
TCGA-AA-A02F-01A-01R-A089-07	TCGA-AA-A02F	TCGA-AA-A02F-01A	TP	Primary solid Tumor	TCGA-AA-A02F-01A	1	Primary	a4b18666-1f38-4bc8-9472-d0ea63ae5a2d	TCGA-AA-A02F	Primary Tumor	FALSE	Solid Tissue	released	FALSE	Tumor	Unknown	Not Reported	1128	590	NA	F260851E-018C-4F5E-8CB4-7D85F391A41B	NA	NA	No	Stage IV	0	list(days_to_treatment_end = c(NA, NA), days_to_treatment_start = c(NA, NA), treatment_id = c("0d0098bf-0606-59a5-b86c-bf77d6901920", "530ceea5-8bb2-53e2-a3e1-754114b26aa7"), submitter_id = c("TCGA-AA-A02F_treatment_1", "TCGA-AA-A02F_treatment"), treatment_type = c("Pharmaceutical Therapy, NOS", "Radiation Therapy, NOS"), regimen_or_line_of_therapy = c(NA, NA), treatment_effect = c(NA, NA), thera…	not reported	Sigmoid colon	1216	25051	Carcinoma, NOS	no	2007	No	6th	T3	2024-03-10	N1	M1	not reported	29c6afa1-7f05-5685-bd79-8d813ccab593	C18.7	Sigmoid colon	Not Reported	not reported	Not Reported	106a818a-d697-569d-af48-767cdbc2e6b5	not reported
TCGA-D5-7000-01A-11R-A32Z-07	TCGA-D5-7000	TCGA-D5-7000-01A	TP	Primary solid Tumor	TCGA-D5-7000-01A	1	Primary	1dc340a0-b8d0-47b3-b87b-d5546e6ee77e	TCGA-D5-7000	Primary Tumor	NA	Solid Tissue	released	FALSE	Tumor	Unknown	Not Reported	NA	NA	0.5	027e06d6-f4c5-433b-9b41-3a31678ed776	0.5	0.9	No	Stage I	0	list(treatment_intent_type = c(NA, NA), updated_datetime = c("2019-07-31T18:42:52.417357-05:00", "2019-07-31T18:42:52.417357-05:00"), treatment_id = c("8e6bb396-5e96-52e4-b4a1-01cd97040441", "8ef60676-7b99-51ec-93c0-6eb5c3e27f51"), submitter_id = c("TCGA-D5-7000_treatment", "TCGA-D5-7000_treatment_1"), treatment_type = c("Radiation Therapy, NOS", "Pharmaceutical Therapy, NOS"), state = c("release…	not reported	Cecum	312	28913	Mucinous adenocarcinoma	no	2011	No	7th	T2	1980-03-01	N0	M0	not reported	a8b868c3-91a6-54f5-9887-7609a489a8e6	C18.0	Cecum	Not Reported	not reported	Not Reported	baa68ac9-4df1-5617-bb20-b6c58f0fbdcc	white
TCGA-DM-A1DB-01A-11R-A155-07	TCGA-DM-A1DB	TCGA-DM-A1DB-01A	TP	Primary solid Tumor	TCGA-DM-A1DB-01A	1	Primary	f80aef75-2b96-4085-b388-fab93485f809	TCGA-DM-A1DB	Primary Tumor	FALSE	Solid Tissue	released	FALSE	Tumor	Unknown	Not Reported	3958	200	NA	71808664-82BA-4B65-B719-C54176F69ABF	NA	NA	No	Stage IIA	0	list(treatment_intent_type = c(NA, NA), updated_datetime = c("2019-07-31T18:38:08.934690-05:00", "2019-07-31T18:38:08.934690-05:00"), treatment_id = c("bf46e469-d18f-5e38-b3f6-b3b486a63f9e", "db4ef4fc-c345-545c-9cc9-62060aa0d286"), submitter_id = c("TCGA-DM-A1DB_treatment", "TCGA-DM-A1DB_treatment_1"), treatment_type = c("Radiation Therapy, NOS", "Pharmaceutical Therapy, NOS"), state = c("release…	not reported	Sigmoid colon	1348	24888	Adenocarcinoma, NOS	no	2000	No	NA	T3	1940-03-01	N0	M0	not reported	a9df2c29-a077-5482-9a87-68c39090c44c	C18.7	Sigmoid colon	Not Reported	not reported	Not Reported	edb27022-f04e-5b05-91f7-1ece425b93f8	white
TCGA-DM-A282-01A-12R-A16W-07	TCGA-DM-A282	TCGA-DM-A282-01A	TP	Primary solid Tumor	TCGA-DM-A282-01A	1	Primary	ce97b1c6-7a17-4cd3-888d-b55e4e585459	TCGA-DM-A282	Primary Tumor	FALSE	Solid Tissue	released	FALSE	Tumor	Unknown	Not Reported	4047	150	NA	F38C6493-9B5D-4BEC-81AB-B79CF6BD89A7	NA	NA	No	Stage IIA	0	list(treatment_intent_type = c(NA, NA), updated_datetime = c("2019-07-31T18:39:30.779527-05:00", "2019-07-31T18:39:30.779527-05:00"), treatment_id = c("5d8d8581-bd05-55f6-8e72-5bec14d31db9", "c16eb6cd-f5db-56f7-b7a1-f351907b3322"), submitter_id = c("TCGA-DM-A282_treatment", "TCGA-DM-A282_treatment_1"), treatment_type = c("Radiation Therapy, NOS", "Pharmaceutical Therapy, NOS"), state = c("release…	not reported	Hepatic flexure of colon	4233	22265	Mucinous adenocarcinoma	no	2000	No	6th	T3	1980-03-01	N0	M0	not reported	898c13b3-4b86-5fcc-a27a-e8b29e70f496	C18.3	Hepatic flexure of colon	Not Reported	not reported	Not Reported	2628ac94-657a-5c6c-91b5-a2d5ab127f7f	white
TCGA-D5-6928-01A-11R-1928-07	TCGA-D5-6928	TCGA-D5-6928-01A	TP	Primary solid Tumor	TCGA-D5-6928-01A	1	Primary	2fcfeba3-1455-43c1-b10f-1559fd0e03cf	TCGA-D5-6928	Primary Tumor	NA	Solid Tissue	released	FALSE	Tumor	Unknown	Not Reported	NA	NA	1	96cfcf3b-2cc8-4ef3-968b-ab7577775baa	0.8	1	No	Stage IIA	0	list(treatment_intent_type = c(NA, NA), updated_datetime = c("2019-07-31T18:40:04.364622-05:00", "2019-07-31T18:40:04.364622-05:00"), treatment_id = c("13c21504-d801-5664-a4d3-e888fd6bd5dd", "7d7cca62-2414-51e7-9e9f-1e18a8fc07d0"), submitter_id = c("TCGA-D5-6928_treatment", "TCGA-D5-6928_treatment_1"), treatment_type = c("Radiation Therapy, NOS", "Pharmaceutical Therapy, NOS"), state = c("release…	not reported	Hepatic flexure of colon	354	29411	Mucinous adenocarcinoma	no	2011	No	7th	T3	1980-03-01	N0	M0	not reported	50208049-0c46-5c6c-9173-f75b3a6a424d	C18.3	Hepatic flexure of colon	Not Reported	not reported	Not Reported	37fb0327-939c-54fb-8e5c-b58cc9ee3cab	white
TCGA-AD-A5EK-01A-11R-A28H-07	TCGA-AD-A5EK	TCGA-AD-A5EK-01A	TP	Primary solid Tumor	TCGA-AD-A5EK-01A	1	Primary	c48314ee-c778-4b82-8e5a-4923df4c8413	TCGA-AD-A5EK	Primary Tumor	FALSE	Solid Tissue	released	FALSE	Tumor	Unknown	Not Reported	177	70	NA	603C0BEB-A258-454E-970D-8ACABA1EE96D	NA	NA	No	Stage I	0	list(treatment_intent_type = c(NA, NA), updated_datetime = c("2019-07-31T18:43:01.784429-05:00", "2019-07-31T18:43:01.784429-05:00"), treatment_id = c("330c90aa-ac8b-5e21-9e65-98219a173eb3", "9ad6b0a2-d180-51ee-8739-e46166c09b37"), submitter_id = c("TCGA-AD-A5EK_treatment", "TCGA-AD-A5EK_treatment_1"), treatment_type = c("Radiation Therapy, NOS", "Pharmaceutical Therapy, NOS"), state = c("release…	not reported	Ascending colon	500	18731	Adenocarcinoma, NOS	no	2012	No	7th	T2	1940-03-01	N0	MX	not reported	f167d1bb-13df-55ae-8ca8-ae1c57cd0fba	C18.2	Ascending colon	Not Reported	not reported	Not Reported	bc04c0e7-639e-5b0d-8e93-4884b101342c	black or african american
TCGA-A6-5656-01A-21R-A278-07	TCGA-A6-5656	TCGA-A6-5656-01A	TP	Primary solid Tumor	TCGA-A6-5656-01A	1	Primary	b85efaf6-8cb4-4929-b29e-4655c107f61a	TCGA-A6-5656	Primary Tumor	NA	Solid Tissue	released	FALSE	Tumor	Unknown	Not Reported	NA	NA	0.6	9396cc9f-adf9-4e3e-9cb4-c0a5190299b9	0.4	1.2	No	Stage I	0	list(days_to_treatment_end = c(NA, NA), days_to_treatment_start = c(NA, NA), treatment_id = c("a4155406-552e-52d2-8697-3311c99a6dce", "aa8e8952-5377-5f83-8641-26e7b45d2929"), submitter_id = c("TCGA-A6-5656_treatment_1", "TCGA-A6-5656_treatment"), treatment_type = c("Pharmaceutical Therapy, NOS", "Radiation Therapy, NOS"), regimen_or_line_of_therapy = c(NA, NA), treatment_effect = c(NA, NA), thera…	not reported	Sigmoid colon	1001	27184	Adenocarcinoma, NOS	no	2010	No	7th	T2	1940-03-01	N0	M0	not reported	028a6c81-e6ad-54d6-b704-f2e221dc1175	C18.7	Sigmoid colon	Not Reported	not reported	Not Reported	54d036be-6b9d-5230-9bd2-ee10f7b4e636	white
TCGA-AY-6197-01A-11R-1723-07	TCGA-AY-6197	TCGA-AY-6197-01A	TP	Primary solid Tumor	TCGA-AY-6197-01A	1	Primary	066aaaaf-f945-4b04-9db5-d556f0c2bc08	TCGA-AY-6197	Primary Tumor	NA	Solid Tissue	released	FALSE	Tumor	Unknown	Not Reported	NA	NA	0.9	0255efb9-d9fd-492f-861b-ab2472a790a2	0.6	1.3	No	Stage IIA	0	list(treatment_intent_type = c(NA, NA), updated_datetime = c("2019-07-31T18:40:32.882821-05:00", "2019-07-31T18:40:32.882821-05:00"), treatment_id = c("69cc9d13-2606-5442-ab06-7e2ef23d9e02", "99242146-c31a-5c81-a81b-cf3d0287c84c"), submitter_id = c("TCGA-AY-6197_treatment", "TCGA-AY-6197_treatment_1"), treatment_type = c("Radiation Therapy, NOS", "Pharmaceutical Therapy, NOS"), state = c("release…	not reported	Ascending colon	652	21957	Adenocarcinoma, NOS	no	2010	No	7th	T3	1940-03-01	N0	NA	not reported	fe4ed6b2-940d-5717-925a-98b87ad70188	C18.2	Cecum	Not Reported	not reported	Not Reported	7c35cc45-7231-5049-ab4f-42bad08ed195	white
TCGA-DM-A28C-01A-11R-A32Y-07	TCGA-DM-A28C	TCGA-DM-A28C-01A	TP	Primary solid Tumor	TCGA-DM-A28C-01A	1	Primary	a3674348-7d0c-4d1a-b825-a335f79a4b79	TCGA-DM-A28C	Primary Tumor	FALSE	Solid Tissue	released	FALSE	Tumor	Unknown	Not Reported	3500	180	NA	8C4517E8-8E37-4BA2-AF3B-5621F1C572A8	NA	NA	No	Stage IIA	0	list(days_to_treatment_end = c(NA, NA), days_to_treatment_start = c(NA, NA), treatment_id = c("578af3d7-7b0c-52c9-bf7b-faae0f7208af", "da75c50f-2813-5894-9cf9-0671f83aedb1"), submitter_id = c("TCGA-DM-A28C_treatment_1", "TCGA-DM-A28C_treatment"), treatment_type = c("Pharmaceutical Therapy, NOS", "Radiation Therapy, NOS"), regimen_or_line_of_therapy = c(NA, NA), treatment_effect = c(NA, NA), thera…	not reported	Sigmoid colon	2475	27073	Adenocarcinoma, NOS	no	2001	No	6th	T3	1940-03-01	N0	M0	not reported	7d775efb-6ce9-5c04-909c-06cf49d58c1a	C18.7	Sigmoid colon	Not Reported	not reported	Not Reported	f1b81bb6-0816-5ea4-aeeb-b354f6f042e6	white
TCGA-A6-5664-01A-21R-1839-07	TCGA-A6-5664	TCGA-A6-5664-01A	TP	Primary solid Tumor	TCGA-A6-5664-01A	1	Primary	3048539a-b914-4e43-b1cc-43ea707e3b3d	TCGA-A6-5664	Primary Tumor	NA	Solid Tissue	released	FALSE	Tumor	Unknown	Not Reported	NA	NA	0.8	246d4906-c366-4317-97b3-cf159bb82689	0.8	1.3	No	Stage IIIC	0	list(treatment_intent_type = c(NA, NA), updated_datetime = c("2019-07-31T18:40:41.458310-05:00", "2019-07-31T18:40:41.458310-05:00"), treatment_id = c("59a51205-f436-55fe-8812-4b5102e31b55", "b38e811d-e722-5178-8511-634f6eb956ad"), submitter_id = c("TCGA-A6-5664_treatment", "TCGA-A6-5664_treatment_1"), treatment_type = c("Radiation Therapy, NOS", "Pharmaceutical Therapy, NOS"), state = c("release…	not reported	Colon, NOS	672	29426	Adenocarcinoma, NOS	no	2010	No	7th	T4a	1940-03-01	N2a	MX	not reported	11b85bd5-0387-5dc4-86db-41d69a998d35	C18.2	Cecum	Not Reported	not reported	Not Reported	134339e2-ddc5-566c-98e9-4a66d5d046b1	black or african american
TCGA-A6-2683-01A-01R-0821-07	TCGA-A6-2683	TCGA-A6-2683-01A	TP	Primary solid Tumor	TCGA-A6-2683-01A	1	Primary	c24759f8-566b-42da-a26d-bb0bf51ee15f	TCGA-A6-2683	Primary Tumor	NA	Solid Tissue	released	FALSE	Tumor	Unknown	Not Reported	NA	NA	0.6	05891cb8-c672-4ea0-864d-6f5699bdd9e4	0.3	1.7	No	Stage IV	0	list(days_to_treatment_end = c(NA, NA), days_to_treatment_start = c(NA, NA), treatment_id = c("8a9c5c85-56b3-50e9-b8ea-071903a4e78d", "c2de6f20-10a7-537a-9915-eb0dabca66d9"), submitter_id = c("TCGA-A6-2683_treatment_1", "TCGA-A6-2683_treatment"), treatment_type = c("Pharmaceutical Therapy, NOS", "Radiation Therapy, NOS"), regimen_or_line_of_therapy = c(NA, NA), treatment_effect = c(NA, NA), thera…	not reported	Ascending colon	472	20871	Adenocarcinoma, NOS	no	2009	No	6th	T4	1940-03-01	N0	M1	not reported	ddb1d720-03f7-5d3f-b3b4-8dd94d3d1341	C18.2	Ascending colon	Not Reported	not reported	Not Reported	5f385b32-374e-5ef7-8fab-269b74c1a020	white
TCGA-AA-3818-01A-01R-0905-07	TCGA-AA-3818	TCGA-AA-3818-01A	TP	Primary solid Tumor	TCGA-AA-3818-01A	1	Primary	0cf35153-2c04-4bdd-91e0-d63cb98da5bf	TCGA-AA-3818	Primary Tumor	NA	Solid Tissue	released	FALSE	Tumor	Unknown	Not Reported	NA	NA	0.8	f5bd12b0-e886-4da5-b7b6-b264d4c61439	0.8	1	No	Stage IIA	0	list(treatment_intent_type = c(NA, NA), updated_datetime = c("2019-07-31T18:41:15.434480-05:00", "2019-07-31T18:41:15.434480-05:00"), treatment_id = c("4f68bba4-5739-5a87-aa87-b631d5e76281", "a86c8a25-f07f-5d7b-801f-4fec2d9aff84"), submitter_id = c("TCGA-AA-3818_treatment", "TCGA-AA-3818_treatment_1"), treatment_type = c("Radiation Therapy, NOS", "Pharmaceutical Therapy, NOS"), state = c("release…	not reported	Colon, NOS	NA	28763	Adenocarcinoma, NOS	no	2007	No	6th	T3	1940-03-01	N0	M0	not reported	2767af06-0453-5d4a-b4b2-4d36ff1abddb	C18.9	Colon, NOS	Not Reported	not reported	Not Reported	32d0bc1d-f24d-5995-9c6a-bc1c45a92862	not reported
TCGA-AA-3660-01A-01R-1723-07	TCGA-AA-3660	TCGA-AA-3660-01A	TP	Primary solid Tumor	TCGA-AA-3660-01A	1	Primary	87cf1a20-2dc5-4c06-b0c4-16103be40ef0	TCGA-AA-3660	Primary Tumor	NA	Solid Tissue	released	FALSE	Tumor	Unknown	Not Reported	NA	NA	0.4	5b62d771-4e67-4983-928f-b98fb1cad99b	0.4	0.4	No	Stage II	0	list(days_to_treatment_end = c(NA, NA), days_to_treatment_start = c(NA, NA), treatment_id = c("58e82586-9e95-50f3-aa35-86ce548d60bf", "67987cc9-22df-5fe6-b7a5-c12589b19dbb"), submitter_id = c("TCGA-AA-3660_treatment_1", "TCGA-AA-3660_treatment"), treatment_type = c("Pharmaceutical Therapy, NOS", "Radiation Therapy, NOS"), regimen_or_line_of_therapy = c(NA, NA), treatment_effect = c(NA, NA), thera…	not reported	Colon, NOS	2375	18932	Adenocarcinoma, NOS	no	2005	No	5th	T3	1940-03-01	N0	M0	not reported	0c65cb46-40f0-59f1-898f-1726882ee790	C18.9	Colon, NOS	Not Reported	not reported	Not Reported	0ceff1f3-fff5-52a8-a72f-3128ca6e0cfb	not reported
TCGA-AA-3860-01A-02R-0905-07	TCGA-AA-3860	TCGA-AA-3860-01A	TP	Primary solid Tumor	TCGA-AA-3860-01A	1	Primary	c1ea307f-cf39-4b09-8185-da56c37ce0d9	TCGA-AA-3860	Primary Tumor	NA	Solid Tissue	released	FALSE	Tumor	Unknown	Not Reported	NA	NA	0.5	6927c8e2-acfb-4ace-a996-636536218b52	0.5	0.7	Not Reported	Stage IIIB	0	list(days_to_treatment_end = c(NA, NA), days_to_treatment_start = c(NA, NA), treatment_id = c("0252d725-b2c8-5d00-b479-322320c12c8c", "1aca079c-bf56-5bae-8be2-aa4c38a642a4"), submitter_id = c("TCGA-AA-3860_treatment_1", "TCGA-AA-3860_treatment"), treatment_type = c("Pharmaceutical Therapy, NOS", "Radiation Therapy, NOS"), regimen_or_line_of_therapy = c(NA, NA), treatment_effect = c(NA, NA), thera…	not reported	Sigmoid colon	945	19449	Adenocarcinoma, NOS	yes	2009	No	6th	T3	1940-03-01	N1	M0	not reported	5b291082-1fe8-5a10-82c1-220d3368f172	C18.7	Sigmoid colon	Not Reported	not reported	Not Reported	b1e7e3eb-7ff1-5a00-88f3-49ae02708d00	not reported
TCGA-AA-3516-11A-01R-A32Z-07	TCGA-AA-3516	TCGA-AA-3516-11A	NT	Solid Tissue Normal	TCGA-AA-3516-11A	11	Not Applicable	1acba753-2af3-4ce5-accb-5b94b8d3ee1f	TCGA-AA-3516	Solid Tissue Normal	NA	Solid Tissue	released	FALSE	Normal	Unknown	Not Reported	NA	NA	0.9	NA	0.6	1	Not Reported	Stage III	0	list(treatment_intent_type = c(NA, NA), updated_datetime = c("2019-07-31T18:38:20.697226-05:00", "2019-07-31T18:38:20.697226-05:00"), treatment_id = c("8e750655-a0b5-53ba-8e02-60a112cb0c59", "bdb2ae1f-1dbc-5ae6-a9d4-ecf5c0775654"), submitter_id = c("TCGA-AA-3516_treatment", "TCGA-AA-3516_treatment_1"), treatment_type = c("Radiation Therapy, NOS", "Pharmaceutical Therapy, NOS"), state = c("release…	not reported	Colon, NOS	0	27303	Mucinous adenocarcinoma	yes	2007	Yes	5th	T3	1980-03-01	N2	M0	not reported	fdf60a53-e7e1-5c35-a5dc-5703b57650bc	C18.9	Colon, NOS	Not Reported	not reported	Not Reported	e0c886a4-e71d-5ba8-becf-729c93d551dd	not reported
TCGA-AA-3516-01A-02R-0826-07	TCGA-AA-3516	TCGA-AA-3516-01A	TP	Primary solid Tumor	TCGA-AA-3516-01A	1	Primary	4e4f7bec-56af-4888-b40b-a33218b010e8	TCGA-AA-3516	Primary Tumor	NA	Solid Tissue	released	FALSE	Tumor	Unknown	Not Reported	NA	NA	0.6	582a3c15-76f6-43a0-9c41-303e4eeade06	0.3	0.9	Not Reported	Stage III	0	list(treatment_intent_type = c(NA, NA), updated_datetime = c("2019-07-31T18:38:20.697226-05:00", "2019-07-31T18:38:20.697226-05:00"), treatment_id = c("8e750655-a0b5-53ba-8e02-60a112cb0c59", "bdb2ae1f-1dbc-5ae6-a9d4-ecf5c0775654"), submitter_id = c("TCGA-AA-3516_treatment", "TCGA-AA-3516_treatment_1"), treatment_type = c("Radiation Therapy, NOS", "Pharmaceutical Therapy, NOS"), state = c("release…	not reported	Colon, NOS	0	27303	Mucinous adenocarcinoma	yes	2007	Yes	5th	T3	1980-03-01	N2	M0	not reported	fdf60a53-e7e1-5c35-a5dc-5703b57650bc	C18.9	Colon, NOS	Not Reported	not reported	Not Reported	e0c886a4-e71d-5ba8-becf-729c93d551dd	not reported
TCGA-AA-3814-01A-01R-0905-07	TCGA-AA-3814	TCGA-AA-3814-01A	TP	Primary solid Tumor	TCGA-AA-3814-01A	1	Primary	77abfd72-97d2-4abd-8633-99bedfffbe1d	TCGA-AA-3814	Primary Tumor	NA	Solid Tissue	released	FALSE	Tumor	Unknown	Not Reported	NA	NA	0.5	8521e575-b0fe-42b3-baad-107a913a7c21	0.5	0.8	Not Reported	Stage IIA	0	list(days_to_treatment_end = c(NA, NA), days_to_treatment_start = c(NA, NA), treatment_id = c("760b3a0d-ded8-549d-abaf-338d2cae7b29", "76bdb056-05b4-5be7-9900-aea0a2032797"), submitter_id = c("TCGA-AA-3814_treatment_1", "TCGA-AA-3814_treatment"), treatment_type = c("Pharmaceutical Therapy, NOS", "Radiation Therapy, NOS"), regimen_or_line_of_therapy = c(NA, NA), treatment_effect = c(NA, NA), thera…	not reported	Colon, NOS	0	31380	Adenocarcinoma with mixed subtypes	yes	2007	No	6th	T3	1955-03-01	N0	M0	not reported	03e1152c-f492-54c3-ba21-9d88c5f45818	C18.9	Colon, NOS	Not Reported	not reported	Not Reported	a420a3a2-d60f-5159-bba3-e373e427af9c	not reported
TCGA-G4-6310-01A-11R-1723-07	TCGA-G4-6310	TCGA-G4-6310-01A	TP	Primary solid Tumor	TCGA-G4-6310-01A	1	Primary	a0322f55-0853-4b63-9788-4e750557bb58	TCGA-G4-6310	Primary Tumor	NA	Solid Tissue	released	FALSE	Tumor	Unknown	Not Reported	NA	NA	1	b3f10aad-375b-49ec-9295-122bd1293442	0.3	1.6	Not Reported	Stage IIIB	0	list(treatment_intent_type = c(NA, NA), updated_datetime = c("2019-07-31T18:24:03.499723-05:00", "2019-07-31T18:24:03.499723-05:00"), treatment_id = c("6dc75294-117c-525e-85ca-f8e2ebc0fe95", "ba53ff43-7e4c-5e5f-97be-a565fec2b5ee"), submitter_id = c("TCGA-G4-6310_treatment", "TCGA-G4-6310_treatment_1"), treatment_type = c("Radiation Therapy, NOS", "Pharmaceutical Therapy, NOS"), state = c("release…	not reported	Colon, NOS	1935	25243	Adenocarcinoma, NOS	yes	2008	No	6th	T3	1940-03-01	N1	M0	not reported	de98e152-ae68-58f9-96c5-56fce3abb87c	C18.9	Colon, NOS	Not Reported	not reported	Not Reported	73ad139f-0b7f-511f-b379-f47ea64f0c0d	white
TCGA-A6-6649-01A-11R-1774-07	TCGA-A6-6649	TCGA-A6-6649-01A	TP	Primary solid Tumor	TCGA-A6-6649-01A	1	Primary	cb16e564-e613-4f02-9f74-e807a51dd512	TCGA-A6-6649	Primary Tumor	NA	Solid Tissue	released	FALSE	Tumor	Unknown	Not Reported	NA	NA	0.8	fee7ee02-806c-463a-9841-5758c737207a	0.6	1.3	Not Reported	Stage IIIB	0	list(days_to_treatment_end = c(NA, NA), days_to_treatment_start = c(NA, NA), treatment_id = c("3640acf7-9e79-5950-9bf9-7e0fcb492044", "3acb064a-90b9-5bd9-9631-b6c5cfbd233b"), submitter_id = c("TCGA-A6-6649_treatment_1", "TCGA-A6-6649_treatment"), treatment_type = c("Pharmaceutical Therapy, NOS", "Radiation Therapy, NOS"), regimen_or_line_of_therapy = c(NA, NA), treatment_effect = c(NA, NA), thera…	not reported	Ascending colon	735	24237	Adenocarcinoma, NOS	yes	2010	No	NA	T3	1940-03-01	N1b	M0	not reported	4ea167d1-f9ce-54e8-88f9-9ea418b34181	C18.2	Ascending colon	Not Reported	not reported	Not Reported	5153ec9f-3f2c-5fa2-8943-a663eb657b64	white
TCGA-AA-3552-01A-01R-0821-07	TCGA-AA-3552	TCGA-AA-3552-01A	TP	Primary solid Tumor	TCGA-AA-3552-01A	1	Primary	4e728ecb-3169-48fd-9f80-2a5dff2db506	TCGA-AA-3552	Primary Tumor	NA	Solid Tissue	released	FALSE	Tumor	Unknown	Not Reported	NA	NA	0.9	8e12a8a9-9717-4533-969f-1d9545de70f0	0.5	1	Not Reported	Stage IIIC	0	list(treatment_intent_type = c(NA, NA), updated_datetime = c("2019-07-31T18:25:11.881454-05:00", "2019-07-31T18:25:11.881454-05:00"), treatment_id = c("627e6ffb-3166-5dc5-a163-01577417e3e8", "852c86ba-6d2a-503f-8f5f-2a80ce8a1b22"), submitter_id = c("TCGA-AA-3552_treatment", "TCGA-AA-3552_treatment_1"), treatment_type = c("Radiation Therapy, NOS", "Pharmaceutical Therapy, NOS"), state = c("release…	not reported	Cecum	0	31290	Adenocarcinoma, NOS	yes	2008	No	6th	T3	1940-03-01	N2	M0	not reported	0fd47f76-6705-5d95-a27c-03824413de88	C18.0	Cecum	Not Reported	not reported	Not Reported	5ba4c312-d41c-50d8-b1b0-e945321690bb	not reported
TCGA-AA-3562-01A-02R-0821-07	TCGA-AA-3562	TCGA-AA-3562-01A	TP	Primary solid Tumor	TCGA-AA-3562-01A	1	Primary	24241962-662a-45fa-b715-ddba891ade97	TCGA-AA-3562	Primary Tumor	NA	Solid Tissue	released	FALSE	Tumor	Unknown	Not Reported	NA	NA	0.8	98738f18-85bd-4aa9-887d-443a1bc00694	0.5	1	Not Reported	Stage IIIC	0	list(treatment_intent_type = c(NA, NA), updated_datetime = c("2019-07-31T18:23:47.994488-05:00", "2019-07-31T18:23:47.994488-05:00"), treatment_id = c("b26c2197-ebf4-572f-8000-596599776ffc", "bbdc0709-f004-5945-83ed-c55683f6d5c8"), submitter_id = c("TCGA-AA-3562_treatment", "TCGA-AA-3562_treatment_1"), treatment_type = c("Radiation Therapy, NOS", "Pharmaceutical Therapy, NOS"), state = c("release…	not reported	Colon, NOS	608	30254	Adenocarcinoma, NOS	yes	2008	No	6th	T3	1940-03-01	N2	M0	not reported	5aca5776-21f4-56bf-ab98-7e0efff8a000	C18.9	Colon, NOS	Not Reported	not reported	Not Reported	bbafba57-496d-5127-9f66-250256e9543a	not reported
TCGA-DM-A285-01A-11R-A16W-07	TCGA-DM-A285	TCGA-DM-A285-01A	TP	Primary solid Tumor	TCGA-DM-A285-01A	1	Primary	1f10d305-91ee-4008-af7b-a242f4353ec0	TCGA-DM-A285	Primary Tumor	FALSE	Solid Tissue	released	FALSE	Tumor	Unknown	Not Reported	3759	80	NA	1B9E9C45-C8A3-4CFA-AB47-965056517D4D	NA	NA	Not Reported	Stage IV	0	list(days_to_treatment_end = c(NA, NA), days_to_treatment_start = c(NA, NA), treatment_id = c("65cfcf22-e178-5ebe-8c2c-02a961361dc4", "908c36c1-7bf9-57d9-8bf3-aae2302999aa"), submitter_id = c("TCGA-DM-A285_treatment_1", "TCGA-DM-A285_treatment"), treatment_type = c("Pharmaceutical Therapy, NOS", "Radiation Therapy, NOS"), regimen_or_line_of_therapy = c(NA, NA), treatment_effect = c(NA, NA), thera…	not reported	Ascending colon	NA	26021	Mucinous adenocarcinoma	yes	2001	No	6th	T3	1980-03-01	N2	M1	not reported	0e9a6a4c-5a00-5cdc-81fb-aa345358de6d	C18.2	Ascending colon	Not Reported	not reported	Not Reported	486bf2aa-ba43-538e-a9b6-710b586dbb92	white
TCGA-AA-3697-01A-01R-1723-07	TCGA-AA-3697	TCGA-AA-3697-01A	TP	Primary solid Tumor	TCGA-AA-3697-01A	1	Primary	c8a9e194-fbb4-4cc5-8cda-665540e8acdc	TCGA-AA-3697	Primary Tumor	NA	Solid Tissue	released	FALSE	Tumor	Unknown	Not Reported	NA	NA	0.8	271de291-30bb-435a-a113-5dccbf38f9ed	0.8	2	No	Stage II	0	list(days_to_treatment_end = c(NA, NA), days_to_treatment_start = c(NA, NA), treatment_id = c("5b8dce59-d58c-552c-a30d-3478d23ed43c", "ca6a7524-4c65-5806-8e2b-5b2ea2abe952"), submitter_id = c("TCGA-AA-3697_treatment_1", "TCGA-AA-3697_treatment"), treatment_type = c("Pharmaceutical Therapy, NOS", "Radiation Therapy, NOS"), regimen_or_line_of_therapy = c(NA, NA), treatment_effect = c(NA, NA), thera…	not reported	Colon, NOS	2587	28367	Adenocarcinoma, NOS	no	2003	No	5th	T3	1940-03-01	N0	M0	not reported	426cdd16-1c95-59db-9faf-c5c6b8391ddf	C18.9	Colon, NOS	Not Reported	not reported	Not Reported	f31e2e17-daa1-58e7-a44f-aa130213ecb8	not reported
TCGA-AA-3950-01A-02R-1022-07	TCGA-AA-3950	TCGA-AA-3950-01A	TP	Primary solid Tumor	TCGA-AA-3950-01A	1	Primary	6f6820c0-beed-4944-a241-d65f58bddf9a	TCGA-AA-3950	Primary Tumor	NA	Solid Tissue	released	FALSE	Tumor	Unknown	Not Reported	NA	NA	0.7	0154afcf-e516-4eaf-bde1-92b7230ddf8a	0.3	1	Not Reported	Stage IIA	0	list(treatment_intent_type = c(NA, NA), updated_datetime = c("2019-07-31T18:37:28.224356-05:00", "2019-07-31T18:37:28.224356-05:00"), treatment_id = c("8df55038-5f7c-5d2c-b43b-19d123fe3ce5", "c1cfa321-b4b4-55a8-8957-93b499fc7eae"), submitter_id = c("TCGA-AA-3950_treatment", "TCGA-AA-3950_treatment_1"), treatment_type = c("Radiation Therapy, NOS", "Pharmaceutical Therapy, NOS"), state = c("release…	not reported	Ascending colon	730	29130	Mucinous adenocarcinoma	yes	2010	No	6th	T3	1980-03-01	N0	M0	not reported	49315af2-455b-5103-a293-115f4a86faa0	C18.2	Ascending colon	Not Reported	not reported	Not Reported	ba382fdf-f987-511f-8fe9-b96827b85447	not reported
TCGA-AA-3675-01A-02R-0905-07	TCGA-AA-3675	TCGA-AA-3675-01A	TP	Primary solid Tumor	TCGA-AA-3675-01A	1	Primary	a4ce3727-4506-493b-95f4-2f11ceb09ceb	TCGA-AA-3675	Primary Tumor	NA	Solid Tissue	released	FALSE	Tumor	Unknown	Not Reported	NA	NA	0.7	f862fea6-b8e7-4faa-8e07-30e72608cd2f	0.4	1.1	No	Stage II	0	list(days_to_treatment_end = c(NA, NA), days_to_treatment_start = c(NA, NA), treatment_id = c("6bd49918-ae28-5617-b4c6-0504bdcf8cdd", "7b2966c5-6ba1-58b0-b27c-2464868288fa"), submitter_id = c("TCGA-AA-3675_treatment_1", "TCGA-AA-3675_treatment"), treatment_type = c("Pharmaceutical Therapy, NOS", "Radiation Therapy, NOS"), regimen_or_line_of_therapy = c(NA, NA), treatment_effect = c(NA, NA), thera…	not reported	Ascending colon	1431	30801	Adenocarcinoma, NOS	no	2006	No	5th	T3	1940-03-01	N0	M0	not reported	b69ce59a-de84-593e-9392-9c404c4c90d2	C18.2	Hepatic flexure of colon	Not Reported	not reported	Not Reported	f87e7eb5-7e78-5af0-8e56-8c65090814db	not reported
TCGA-CA-5255-01A-11R-1839-07	TCGA-CA-5255	TCGA-CA-5255-01A	TP	Primary solid Tumor	TCGA-CA-5255-01A	1	Primary	5747e3d1-3c16-4c85-be2e-bfab9584d61b	TCGA-CA-5255	Primary Tumor	NA	Solid Tissue	released	FALSE	Tumor	Unknown	Not Reported	NA	NA	1	2de28701-8490-4460-83bc-5138572fba09	0.3	1.5	No	Stage IIA	0	list(days_to_treatment_end = c(NA, NA), days_to_treatment_start = c(NA, NA), treatment_id = c("9e883af1-0bb2-5847-bf71-d5c66fad8b45", "a04a14c7-e511-5396-86cc-8a6aec89e049"), submitter_id = c("TCGA-CA-5255_treatment_1", "TCGA-CA-5255_treatment"), treatment_type = c("Pharmaceutical Therapy, NOS", "Radiation Therapy, NOS"), regimen_or_line_of_therapy = c(NA, NA), treatment_effect = c(NA, NA), thera…	not reported	Colon, NOS	376	16743	Adenocarcinoma, NOS	no	2010	No	6th	T3	1940-03-01	N0	M0	not reported	59ebd28c-ef4a-5cda-8429-042492c3f55d	C18.9	Colon, NOS	Not Reported	not reported	Not Reported	c51e003d-b4ec-5a79-9f33-7659fd23e262	asian
TCGA-AA-3858-01A-01R-0905-07	TCGA-AA-3858	TCGA-AA-3858-01A	TP	Primary solid Tumor	TCGA-AA-3858-01A	1	Primary	5ee6076c-f966-4b12-96fb-3a9b198122d9	TCGA-AA-3858	Primary Tumor	NA	Solid Tissue	released	FALSE	Tumor	Unknown	Not Reported	NA	NA	0.6	76997550-47ed-4958-96aa-ac0cdec9f134	0.3	0.8	No	Stage I	0	list(days_to_treatment_end = c(NA, NA), days_to_treatment_start = c(NA, NA), treatment_id = c("579b0c5e-fad9-526e-b574-b5b51a55d147", "9d3c8eb0-b971-5485-b026-148febc921f9"), submitter_id = c("TCGA-AA-3858_treatment_1", "TCGA-AA-3858_treatment"), treatment_type = c("Pharmaceutical Therapy, NOS", "Radiation Therapy, NOS"), regimen_or_line_of_therapy = c(NA, NA), treatment_effect = c(NA, NA), thera…	not reported	Colon, NOS	945	24806	Adenocarcinoma, NOS	no	2009	No	6th	T2	1940-03-01	N0	M0	not reported	a6cbe109-9796-5c9b-a740-60fa88c2ccc5	C18.9	Colon, NOS	Not Reported	not reported	Not Reported	b84cb4d4-a136-5f96-92f4-f5f2c98796da	not reported
TCGA-AA-A02K-01A-03R-A32Y-07	TCGA-AA-A02K	TCGA-AA-A02K-01A	TP	Primary solid Tumor	TCGA-AA-A02K-01A	1	Primary	685df015-1b7b-4993-bf05-e3206619dfba	TCGA-AA-A02K	Primary Tumor	FALSE	Solid Tissue	released	FALSE	Tumor	Unknown	Not Reported	338	270	NA	EDDCC4B3-986B-4415-B742-CF0B98EACF72	NA	NA	No	Stage IV	0	list(days_to_treatment_end = c(NA, NA), days_to_treatment_start = c(NA, NA), treatment_id = c("31320661-b623-5ce8-9ba2-d9c4ce06f8c1", "382f2cd4-ead6-5c4f-afde-401c15253866"), submitter_id = c("TCGA-AA-A02K_treatment_1", "TCGA-AA-A02K_treatment"), treatment_type = c("Pharmaceutical Therapy, NOS", "Radiation Therapy, NOS"), regimen_or_line_of_therapy = c(NA, NA), treatment_effect = c(NA, NA), thera…	not reported	Ascending colon	0	18506	Adenocarcinoma, NOS	no	2009	No	6th	T4	1940-03-01	N2	M1	not reported	61150f8f-fec8-5c85-8f04-0c15cfabbc4f	C18.2	Ascending colon	Not Reported	not reported	Not Reported	6bc2b5c9-8629-52a8-be2f-351a6e130d13	not reported
TCGA-T9-A92H-01A-11R-A37K-07	TCGA-T9-A92H	TCGA-T9-A92H-01A	TP	Primary solid Tumor	TCGA-T9-A92H-01A	1	Primary	2dfb4a43-f4e9-4de6-a385-f96e754d982e	TCGA-T9-A92H	Primary Tumor	FALSE	Solid Tissue	released	FALSE	Tumor	Unknown	Not Reported	91	240	NA	AE058D5A-7249-44E5-87AA-663B07DA6A63	NA	NA	No	Stage IIA	0	list(days_to_treatment_end = c(NA, NA), days_to_treatment_start = c(NA, NA), treatment_id = c("637f28a2-bc93-5377-89ae-370a587f862b", "f594ad6b-b7d1-570a-ad05-3dfce027f4c4"), submitter_id = c("TCGA-T9-A92H_treatment_1", "TCGA-T9-A92H_treatment"), treatment_type = c("Pharmaceutical Therapy, NOS", "Radiation Therapy, NOS"), regimen_or_line_of_therapy = c(NA, NA), treatment_effect = c(NA, NA), thera…	not reported	Sigmoid colon	362	30058	Adenocarcinoma, NOS	no	2013	No	7th	T3	1940-03-01	N0	M0	not reported	293b5207-b0ce-560f-8b25-e753ae538b67	C18.7	Sigmoid colon	Not Reported	not reported	Not Reported	c9c9e680-f208-5e01-9bf8-44bc0cf30405	black or african american
TCGA-G4-6627-01A-11R-1774-07	TCGA-G4-6627	TCGA-G4-6627-01A	TP	Primary solid Tumor	TCGA-G4-6627-01A	1	Primary	d9dc4eb1-ca9d-4f1a-8db9-46d3ab600210	TCGA-G4-6627	Primary Tumor	NA	Solid Tissue	released	FALSE	Tumor	Unknown	Not Reported	NA	NA	0.6	e8744b51-cced-496b-9746-9f06ff93a01e	0.3	1	No	Stage IIA	0	list(days_to_treatment_end = c(NA, NA), days_to_treatment_start = c(NA, NA), treatment_id = c("781a8fe0-fc4c-5afc-a725-581dded27de9", "7b5c1d9c-052b-5770-b42f-36e9975b0385"), submitter_id = c("TCGA-G4-6627_treatment_1", "TCGA-G4-6627_treatment"), treatment_type = c("Pharmaceutical Therapy, NOS", "Radiation Therapy, NOS"), regimen_or_line_of_therapy = c(NA, NA), treatment_effect = c(NA, NA), thera…	not reported	Ascending colon	2175	30697	Adenocarcinoma, NOS	no	2007	No	6th	T3	1940-03-01	N0	M0	not reported	25a93adf-21c3-5586-9282-ad56b22c06d2	C18.2	Ascending colon	Not Reported	not reported	Not Reported	4eb2065c-4116-5e13-b41f-f00158d1c70f	white
TCGA-D5-6529-01A-11R-1774-07	TCGA-D5-6529	TCGA-D5-6529-01A	TP	Primary solid Tumor	TCGA-D5-6529-01A	1	Primary	0fbbfa5e-f2c3-4cc1-aeb3-456bd307cb85	TCGA-D5-6529	Primary Tumor	NA	Solid Tissue	released	FALSE	Tumor	Unknown	Not Reported	NA	NA	0.8	68504eb4-8724-494a-a886-b0c22bc0fb09	0.6	1	No	Stage IIA	0	list(days_to_treatment_end = c(NA, NA), days_to_treatment_start = c(NA, NA), treatment_id = c("6f4dba94-960a-509d-b411-23dcc9d9cbfc", "fcfe5bfd-1219-5af6-a749-28c8c510cf15"), submitter_id = c("TCGA-D5-6529_treatment_1", "TCGA-D5-6529_treatment"), treatment_type = c("Pharmaceutical Therapy, NOS", "Radiation Therapy, NOS"), regimen_or_line_of_therapy = c(NA, NA), treatment_effect = c(NA, NA), thera…	not reported	Colon, NOS	614	25394	Adenocarcinoma, NOS	no	2010	No	7th	T3	1940-03-01	N0	M0	not reported	9fbc2a6b-5c5a-5841-9901-87f8b5927ec5	C18.9	Colon, NOS	Not Reported	not reported	Not Reported	10dec655-eaba-5b1e-8661-3914d6944495	white
TCGA-CA-6716-01A-11R-1839-07	TCGA-CA-6716	TCGA-CA-6716-01A	TP	Primary solid Tumor	TCGA-CA-6716-01A	1	Primary	a519f8a7-a83e-4e07-83aa-eed4bcd37266	TCGA-CA-6716	Primary Tumor	NA	Solid Tissue	released	FALSE	Tumor	Unknown	Not Reported	NA	NA	0.7	c0c68cb6-c411-42e9-a5bc-f05a58f101f3	0.6	1.3	No	Stage IIA	0	list(days_to_treatment_end = c(NA, NA), days_to_treatment_start = c(NA, NA), treatment_id = c("24c11f60-b5e9-5321-8bd4-be6964a329a9", "e94101f6-ed5b-526c-b175-9a0399fdcd97"), submitter_id = c("TCGA-CA-6716_treatment_1", "TCGA-CA-6716_treatment"), treatment_type = c("Pharmaceutical Therapy, NOS", "Radiation Therapy, NOS"), regimen_or_line_of_therapy = c(NA, NA), treatment_effect = c(NA, NA), thera…	not reported	Ascending colon	371	23943	Papillary adenocarcinoma, NOS	no	2010	No	6th	T3	1960-03-01	N0	M0	not reported	5ffa3638-b473-55b3-94af-39ec5d771c57	C18.2	Ascending colon	Not Reported	not reported	Not Reported	86a2e1e2-54fe-53c1-8e6b-d347abd2daf8	asian
TCGA-5M-AAT6-01A-11R-A41B-07	TCGA-5M-AAT6	TCGA-5M-AAT6-01A	TP	Primary solid Tumor	TCGA-5M-AAT6-01A	1	Primary	54cf4c36-eb20-41da-990a-2f6230d62cbf	TCGA-5M-AAT6	Primary Tumor	FALSE	Solid Tissue	released	FALSE	Tumor	Unknown	Not Reported	1589	270	NA	B25D2818-B3C6-49F0-81E6-224488C1E926	NA	NA	No	Stage IV	0	list(days_to_treatment_end = c(NA, NA), days_to_treatment_start = c(NA, NA), treatment_id = c("1eb5a97b-f373-55a9-86a3-623541ee0943", "f5fc0794-6888-55ca-a73e-3452a587baa4"), submitter_id = c("TCGA-5M-AAT6_treatment_1", "TCGA-5M-AAT6_treatment"), treatment_type = c("Pharmaceutical Therapy, NOS", "Radiation Therapy, NOS"), regimen_or_line_of_therapy = c(NA, NA), treatment_effect = c(NA, NA), thera…	not reported	Ascending colon	NA	14852	Adenocarcinoma, NOS	no	2009	No	6th	T4a	1940-03-01	N2b	M1a	not reported	f3c29c8b-1c74-53b0-badf-e374629ff3bf	C18.2	Transverse colon	Not Reported	not reported	Not Reported	3625ca8c-af16-51fd-bc8b-26c6d2aa4599	black or african american
TCGA-AA-3819-01A-01R-0905-07	TCGA-AA-3819	TCGA-AA-3819-01A	TP	Primary solid Tumor	TCGA-AA-3819-01A	1	Primary	3f3abf12-32b0-493f-abea-d885f4aa0f34	TCGA-AA-3819	Primary Tumor	NA	Solid Tissue	released	FALSE	Tumor	Unknown	Not Reported	NA	NA	0.7	549d5d13-b8aa-4798-9fea-135bd09d005a	0.4	1	No	Stage IIA	0	list(treatment_intent_type = c(NA, NA), updated_datetime = c("2019-07-31T18:41:27.084688-05:00", "2019-07-31T18:41:27.084688-05:00"), treatment_id = c("831969d1-7133-5848-a8f1-ba659fa23114", "d6d51539-ea0b-5b11-a883-6cb3b8693db1"), submitter_id = c("TCGA-AA-3819_treatment", "TCGA-AA-3819_treatment_1"), treatment_type = c("Radiation Therapy, NOS", "Pharmaceutical Therapy, NOS"), state = c("release…	not reported	Colon, NOS	761	15280	Adenocarcinoma, NOS	no	2008	No	6th	T3	1940-03-01	N0	M0	not reported	ff935da5-4205-5313-a792-5170d914b30a	C18.9	Colon, NOS	Not Reported	not reported	Not Reported	0c95fab0-d981-5610-b57f-598d5136af64	not reported
TCGA-CM-5344-01A-21R-1723-07	TCGA-CM-5344	TCGA-CM-5344-01A	TP	Primary solid Tumor	TCGA-CM-5344-01A	1	Primary	698584f0-726b-4a10-bc69-9b4acaed2cef	TCGA-CM-5344	Primary Tumor	NA	Solid Tissue	released	FALSE	Tumor	Unknown	Not Reported	NA	NA	1	9af94cfc-6eef-4691-9dfb-c0f60cfebdcb	0.4	2.3	No	Stage IIIB	0	list(days_to_treatment_end = c(NA, NA), days_to_treatment_start = c(NA, NA), treatment_id = c("4a6fd852-3198-55c6-94fa-4b3c0efb5ae8", "c2b5266b-24cd-53e4-a91f-78f230a0756d"), submitter_id = c("TCGA-CM-5344_treatment_1", "TCGA-CM-5344_treatment"), treatment_type = c("Pharmaceutical Therapy, NOS", "Radiation Therapy, NOS"), regimen_or_line_of_therapy = c(NA, NA), treatment_effect = c(NA, NA), thera…	not reported	Sigmoid colon	670	14426	Adenocarcinoma, NOS	no	2010	No	7th	T3	1940-03-01	N1b	M0	not reported	6f2490b3-9010-5d8c-9e89-5fe50560ee78	C18.7	Sigmoid colon	Not Reported	not reported	Not Reported	c50bdb01-a5d5-57e0-bdc7-688c493905d6	white
TCGA-DM-A28A-01A-21R-A32Y-07	TCGA-DM-A28A	TCGA-DM-A28A-01A	TP	Primary solid Tumor	TCGA-DM-A28A-01A	1	Primary	5ab15b14-d6c2-4900-add7-24e3b8df2680	TCGA-DM-A28A	Primary Tumor	FALSE	Solid Tissue	released	FALSE	Tumor	Unknown	Not Reported	3549	120	NA	66BF2525-B76A-4BE5-8FDF-EAE8334F384E	NA	NA	No	Stage IIIC	0	list(days_to_treatment_end = c(NA, NA), days_to_treatment_start = c(NA, NA), treatment_id = c("173aa44e-b7d9-56c7-a467-4dd3da3a62d2", "a0026e18-79fe-5302-b864-65016f7ccb8c"), submitter_id = c("TCGA-DM-A28A_treatment_1", "TCGA-DM-A28A_treatment"), treatment_type = c("Pharmaceutical Therapy, NOS", "Radiation Therapy, NOS"), regimen_or_line_of_therapy = c(NA, NA), treatment_effect = c(NA, NA), thera…	not reported	Cecum	805	28833	Adenocarcinoma, NOS	no	2001	No	6th	T3	1940-03-01	N2	M0	not reported	3b77e86c-3d32-5b27-9a02-d62c5c520e0d	C18.0	Cecum	Not Reported	not reported	Not Reported	3fc1a74d-7d95-54f9-980a-a68f87a6545b	white
TCGA-QG-A5YX-01A-11R-A28H-07	TCGA-QG-A5YX	TCGA-QG-A5YX-01A	TP	Primary solid Tumor	TCGA-QG-A5YX-01A	1	Primary	346253c0-8e8b-459b-a6d5-03da9586578f	TCGA-QG-A5YX	Primary Tumor	TRUE	Solid Tissue	released	FALSE	Tumor	OCT	Not Reported	596	280	NA	D948972B-8F4F-4C2A-9072-7D4A7E1B58DE	NA	NA	No	Stage IIA	0	list(days_to_treatment_end = c(NA, NA), days_to_treatment_start = c(NA, NA), treatment_id = c("6010bdb9-94a0-51cb-ad7d-ad7391a18c90", "c187020c-9685-53fc-a9b5-2537ea92faa3"), submitter_id = c("TCGA-QG-A5YX_treatment_1", "TCGA-QG-A5YX_treatment"), treatment_type = c("Pharmaceutical Therapy, NOS", "Radiation Therapy, NOS"), regimen_or_line_of_therapy = c(NA, NA), treatment_effect = c(NA, NA), thera…	not reported	Sigmoid colon	1003	22617	Adenocarcinoma, NOS	no	2011	No	7th	T3	1940-03-01	N0	MX	not reported	1027744c-2dac-53e3-972b-e5e49cb32467	C18.7	Sigmoid colon	Not Reported	not reported	Not Reported	df307b02-f20d-5e52-8855-db9fa4a1e4c8	black or african american
TCGA-AA-3866-01A-01R-1022-07	TCGA-AA-3866	TCGA-AA-3866-01A	TP	Primary solid Tumor	TCGA-AA-3866-01A	1	Primary	9195e450-b568-49e9-b977-7241aeed04b9	TCGA-AA-3866	Primary Tumor	NA	Solid Tissue	released	FALSE	Tumor	Unknown	Not Reported	NA	NA	0.7	546e3d57-4548-4776-af98-a46df3160a72	0.3	0.8	No	Stage I	0	list(days_to_treatment_end = c(NA, NA), days_to_treatment_start = c(NA, NA), treatment_id = c("5017c37d-b470-5ac4-9bd6-5a8c51e15d6d", "a7f054cc-cc54-5bc1-be35-6006214dcf17"), submitter_id = c("TCGA-AA-3866_treatment_1", "TCGA-AA-3866_treatment"), treatment_type = c("Pharmaceutical Therapy, NOS", "Radiation Therapy, NOS"), regimen_or_line_of_therapy = c(NA, NA), treatment_effect = c(NA, NA), thera…	not reported	Colon, NOS	518	28672	Adenocarcinoma, NOS	no	2006	No	5th	T2	1940-03-01	N0	M0	not reported	9118e109-4742-5920-8c95-a81fd4a04f8a	C18.9	Colon, NOS	Not Reported	not reported	Not Reported	1a562036-305d-54c7-893f-4c9637eee4cc	not reported
TCGA-AA-3833-01A-01R-0905-07	TCGA-AA-3833	TCGA-AA-3833-01A	TP	Primary solid Tumor	TCGA-AA-3833-01A	1	Primary	8b3147c8-71a9-40fb-81cf-9e23ef4b9a29	TCGA-AA-3833	Primary Tumor	NA	Solid Tissue	released	FALSE	Tumor	Unknown	Not Reported	NA	NA	0.5	701e11c7-9fa9-4d45-9d35-1fae3c3827ae	0.3	1	No	Stage IIA	0	list(days_to_treatment_end = c(NA, NA), days_to_treatment_start = c(NA, NA), treatment_id = c("2f613459-5c47-5d28-93ae-bfc4f5b4b806", "a85620fc-c87d-5e17-b856-09029be77037"), submitter_id = c("TCGA-AA-3833_treatment_1", "TCGA-AA-3833_treatment"), treatment_type = c("Pharmaceutical Therapy, NOS", "Radiation Therapy, NOS"), regimen_or_line_of_therapy = c(NA, NA), treatment_effect = c(NA, NA), thera…	not reported	Colon, NOS	485	23011	Adenocarcinoma, NOS	no	2008	No	6th	T3	1940-03-01	N0	M0	not reported	a4824df2-8869-5301-8f21-61f56a500be7	C18.9	Colon, NOS	Not Reported	not reported	Not Reported	dd8e1d39-38a4-5ecd-a42a-5b0b283a3762	not reported
TCGA-A6-6654-01A-21R-1839-07	TCGA-A6-6654	TCGA-A6-6654-01A	TP	Primary solid Tumor	TCGA-A6-6654-01A	1	Primary	47bf3623-a304-48a1-8651-71b6ed41d886	TCGA-A6-6654	Primary Tumor	NA	Solid Tissue	released	FALSE	Tumor	Unknown	Not Reported	NA	NA	0.9	0f0a992e-3a5c-490f-aa3e-62d2b26d580b	0.6	1.3	No	Stage IIIB	0	list(treatment_intent_type = c(NA, NA), updated_datetime = c("2019-07-31T18:31:37.040791-05:00", "2019-07-31T18:31:37.040791-05:00"), treatment_id = c("4b9b6635-7015-5680-b309-4aa51be2ac8e", "5da00ef1-d864-54c4-8507-0862d19f29c7"), submitter_id = c("TCGA-A6-6654_treatment", "TCGA-A6-6654_treatment_1"), treatment_type = c("Radiation Therapy, NOS", "Pharmaceutical Therapy, NOS"), state = c("release…	not reported	Colon, NOS	726	23953	Adenocarcinoma, NOS	no	2011	No	7th	T3	1940-03-01	N1	M0	not reported	7d7d886b-e662-5e9b-873e-ae1de589ab48	C18.9	Colon, NOS	Not Reported	not reported	Not Reported	88ba239a-f6ed-56a8-b501-3ad0cf79a9e4	white
TCGA-AD-6889-01A-11R-1928-07	TCGA-AD-6889	TCGA-AD-6889-01A	TP	Primary solid Tumor	TCGA-AD-6889-01A	1	Primary	84353925-7847-4e40-a5a2-c5be6539261f	TCGA-AD-6889	Primary Tumor	NA	Solid Tissue	released	FALSE	Tumor	Unknown	Not Reported	NA	NA	0.5	baf2a936-e132-47d6-831f-675625feaf0b	0.5	1	No	Stage IIA	0	list(days_to_treatment_end = c(NA, NA), days_to_treatment_start = c(NA, NA), treatment_id = c("422ef266-43ac-511a-9c66-0b91c2e194ab", "889e96bf-050a-583a-95f7-6bfe5f9a2fc9"), submitter_id = c("TCGA-AD-6889_treatment_1", "TCGA-AD-6889_treatment"), treatment_type = c("Pharmaceutical Therapy, NOS", "Radiation Therapy, NOS"), regimen_or_line_of_therapy = c(NA, NA), treatment_effect = c(NA, NA), thera…	not reported	Ascending colon	2056	NA	Adenocarcinoma, NOS	no	2005	No	6th	T3	1940-03-01	N0	M0	not reported	ee5a8954-e59b-5faf-b117-a1bb2fc6eb4b	C18.2	Ascending colon	Not Reported	not reported	Not Reported	ae9c1853-89a3-508d-80ab-d591ccc849cc	asian
TCGA-CM-5860-01A-01R-1653-07	TCGA-CM-5860	TCGA-CM-5860-01A	TP	Primary solid Tumor	TCGA-CM-5860-01A	1	Primary	445d5e8c-db8d-44f4-b3d0-d1857cb2ef48	TCGA-CM-5860	Primary Tumor	NA	Solid Tissue	released	FALSE	Tumor	Unknown	Not Reported	NA	NA	1.1	a827f69b-9150-430b-a680-a84f30182e63	0.3	1.5	No	Stage IIA	0	list(treatment_intent_type = c(NA, NA), updated_datetime = c("2019-07-31T18:33:05.194724-05:00", "2019-07-31T18:33:05.194724-05:00"), treatment_id = c("0425142e-b357-52d0-ab90-48fd75434539", "1fd98d46-2322-54d1-965a-0900c9613865"), submitter_id = c("TCGA-CM-5860_treatment", "TCGA-CM-5860_treatment_1"), treatment_type = c("Radiation Therapy, NOS", "Pharmaceutical Therapy, NOS"), state = c("release…	not reported	Ascending colon	974	16344	Adenocarcinoma, NOS	no	2010	No	7th	T3	1940-03-01	N0	M0	not reported	7642a5b2-69ce-552e-a009-1802356e97fe	C18.2	Ascending colon	Not Reported	not reported	Not Reported	f201b7f2-3103-551a-b475-8d0b629a1b1d	white
TCGA-AZ-4684-01A-01R-1410-07	TCGA-AZ-4684	TCGA-AZ-4684-01A	TP	Primary solid Tumor	TCGA-AZ-4684-01A	1	Primary	37ad61ea-96d1-40f1-b77a-56408e4243ea	TCGA-AZ-4684	Primary Tumor	NA	Solid Tissue	released	FALSE	Tumor	Unknown	Not Reported	NA	NA	1	3e3c0aa0-73dd-47f1-989b-2871336385af	0.3	1.8	No	Stage IVA	0	list(treatment_intent_type = c(NA, NA), updated_datetime = c("2019-07-31T18:37:13.482000-05:00", "2019-07-31T18:37:13.482000-05:00"), treatment_id = c("78d6b8e7-004c-5b7d-a144-6e6f1de8074a", "dd566a46-1a36-5fd2-917e-10e23a1334f9"), submitter_id = c("TCGA-AZ-4684_treatment", "TCGA-AZ-4684_treatment_1"), treatment_type = c("Radiation Therapy, NOS", "Pharmaceutical Therapy, NOS"), state = c("release…	not reported	Rectosigmoid junction	1977	18252	Adenocarcinoma, NOS	no	2006	No	NA	T3	1940-03-01	N2	M1	not reported	0fcb44bf-bfbd-55e6-9975-2ab4512ec859	C19	Rectosigmoid junction	Not Reported	not reported	Not Reported	0ecf27ba-a3fa-5f5c-8a35-1f36fdd16912	white
TCGA-D5-6534-01A-21R-1928-07	TCGA-D5-6534	TCGA-D5-6534-01A	TP	Primary solid Tumor	TCGA-D5-6534-01A	1	Primary	a73684e4-7cf1-4e9d-83b8-a6ebebd51101	TCGA-D5-6534	Primary Tumor	NA	Solid Tissue	released	FALSE	Tumor	Unknown	Not Reported	NA	NA	0.6	637c02fe-9238-4474-ba5b-15719353895b	0.6	1.1	No	Stage IIA	0	list(days_to_treatment_end = c(NA, NA), days_to_treatment_start = c(NA, NA), treatment_id = c("16428f23-72a6-5fbd-882b-e5a90bab0eef", "aabd9f63-90cd-5f49-b74f-f45dc00b4d88"), submitter_id = c("TCGA-D5-6534_treatment_1", "TCGA-D5-6534_treatment"), treatment_type = c("Pharmaceutical Therapy, NOS", "Radiation Therapy, NOS"), regimen_or_line_of_therapy = c(NA, NA), treatment_effect = c(NA, NA), thera…	not reported	Colon, NOS	1316	22778	Mucinous adenocarcinoma	no	2010	No	7th	T3	1980-03-01	N0	M0	not reported	7db0b07f-421b-5ab7-8468-da685c95a0fc	C18.9	Colon, NOS	Not Reported	not reported	Not Reported	90469361-4ca3-52be-a45a-74e971ec39ad	white
TCGA-AA-3848-01A-01R-0905-07	TCGA-AA-3848	TCGA-AA-3848-01A	TP	Primary solid Tumor	TCGA-AA-3848-01A	1	Primary	fb1ebc1d-d580-4754-8f48-1dfb7a1054a4	TCGA-AA-3848	Primary Tumor	NA	Solid Tissue	released	FALSE	Tumor	Unknown	Not Reported	NA	NA	0.7	f8dda0f2-1a9b-4219-bcfb-a33416ad74be	0.5	1	No	Stage IIIC	0	list(days_to_treatment_end = c(NA, NA), days_to_treatment_start = c(NA, NA), treatment_id = c("3f3d711b-dc6e-5b91-9e65-830aa137c8e4", "ff2fb4ad-62cd-5812-9f46-cef6eaf8043f"), submitter_id = c("TCGA-AA-3848_treatment_1", "TCGA-AA-3848_treatment"), treatment_type = c("Pharmaceutical Therapy, NOS", "Radiation Therapy, NOS"), regimen_or_line_of_therapy = c(NA, NA), treatment_effect = c(NA, NA), thera…	not reported	Sigmoid colon	30	30194	Adenocarcinoma, NOS	no	2009	No	6th	T3	1940-03-01	N2	M0	not reported	011296e6-c072-587c-833f-9343d05b00d2	C18.7	Sigmoid colon	Not Reported	not reported	Not Reported	12938001-e749-5d1e-a669-90e7629f6012	not reported
TCGA-AD-6890-01A-11R-1928-07	TCGA-AD-6890	TCGA-AD-6890-01A	TP	Primary solid Tumor	TCGA-AD-6890-01A	1	Primary	77204666-6ad8-40b2-b121-601fd18bffdb	TCGA-AD-6890	Primary Tumor	NA	Solid Tissue	released	FALSE	Tumor	Unknown	Not Reported	NA	NA	0.2	572896cd-23b9-431a-8272-94d582e4a672	0.1	0.3	No	NA	0	list(days_to_treatment_end = c(NA, NA), days_to_treatment_start = c(NA, NA), treatment_id = c("98858d13-5fd2-5ef0-a54a-d1016651f20a", "f8934200-8f59-508e-954c-e456006f7a04"), submitter_id = c("TCGA-AD-6890_treatment_1", "TCGA-AD-6890_treatment"), treatment_type = c("Pharmaceutical Therapy, NOS", "Radiation Therapy, NOS"), regimen_or_line_of_therapy = c(NA, NA), treatment_effect = c(NA, NA), thera…	not reported	Ascending colon	746	23769	Adenocarcinoma, NOS	no	2010	No	7th	T1	1940-03-01	N0	MX	not reported	4ed53357-9b74-5c57-bf07-8350d58db404	C18.2	Ascending colon	Not Reported	not reported	Not Reported	44b8c398-8950-550f-86a0-435852a5b8f1	white
TCGA-AA-3549-01A-02R-0821-07	TCGA-AA-3549	TCGA-AA-3549-01A	TP	Primary solid Tumor	TCGA-AA-3549-01A	1	Primary	86158696-60a3-45b7-8351-d800f57ef23b	TCGA-AA-3549	Primary Tumor	NA	Solid Tissue	released	FALSE	Tumor	Unknown	Not Reported	NA	NA	0.7	c241ece3-8a28-4984-aea5-cbb5379e8d75	0.3	1	No	Stage I	0	list(treatment_intent_type = c(NA, NA), updated_datetime = c("2019-07-31T18:39:25.071028-05:00", "2019-07-31T18:39:25.071028-05:00"), treatment_id = c("9dde8b90-276d-5a7b-8421-04a5a80fdcb1", "c90bf09d-da9e-54f4-a6ed-68615def25ad"), submitter_id = c("TCGA-AA-3549_treatment", "TCGA-AA-3549_treatment_1"), treatment_type = c("Radiation Therapy, NOS", "Pharmaceutical Therapy, NOS"), state = c("release…	not reported	Colon, NOS	639	25415	Adenocarcinoma, NOS	no	2008	No	6th	T2	1940-03-01	N0	M0	not reported	e2cf51cf-7393-5f02-b402-85a61bb1d6bc	C18.9	Colon, NOS	Not Reported	not reported	Not Reported	225e7f2c-24d4-5eb6-9101-9f0c6b23ded0	not reported
TCGA-CM-6162-01A-11R-1653-07	TCGA-CM-6162	TCGA-CM-6162-01A	TP	Primary solid Tumor	TCGA-CM-6162-01A	1	Primary	b9e728d2-143f-44d1-b2ee-0f6eccca507f	TCGA-CM-6162	Primary Tumor	NA	Solid Tissue	released	FALSE	Tumor	Unknown	Not Reported	NA	NA	1.3	e5b534c1-549f-4741-b763-3b1f5be845a5	0.4	2.3	No	Stage IIIB	0	list(days_to_treatment_end = c(NA, NA), days_to_treatment_start = c(NA, NA), treatment_id = c("831fd8f3-7f69-5a46-bbd4-86b4027b4d90", "b517832c-c386-5eda-86c5-4185f06ffed0"), submitter_id = c("TCGA-CM-6162_treatment_1", "TCGA-CM-6162_treatment"), treatment_type = c("Pharmaceutical Therapy, NOS", "Radiation Therapy, NOS"), regimen_or_line_of_therapy = c(NA, NA), treatment_effect = c(NA, NA), thera…	not reported	Ascending colon	365	17624	Mucinous adenocarcinoma	no	2010	No	7th	T3	1980-03-01	N1a	M0	not reported	0ab6867f-aa3b-5133-8fcc-dc0895bbeaa6	C18.2	Ascending colon	Not Reported	not reported	Not Reported	139bb3bb-3a2d-5afa-b1af-17a8bbfa7c40	white
TCGA-A6-6140-01A-11R-1774-07	TCGA-A6-6140	TCGA-A6-6140-01A	TP	Primary solid Tumor	TCGA-A6-6140-01A	1	Primary	7ab37803-051a-4731-8d63-201f0400d435	TCGA-A6-6140	Primary Tumor	NA	Solid Tissue	released	FALSE	Tumor	Unknown	Not Reported	NA	NA	0.9	72f5199d-0b09-44b9-81fd-67a71f21f2af	0.6	1.4	No	Stage IIA	0	list(days_to_treatment_end = c(NA, NA), days_to_treatment_start = c(NA, NA), treatment_id = c("138b1464-3de4-5360-a9ef-d7b41eae2044", "18d6ad45-58cf-5c34-ae8e-dfb84e5475dd"), submitter_id = c("TCGA-A6-6140_treatment_1", "TCGA-A6-6140_treatment"), treatment_type = c("Pharmaceutical Therapy, NOS", "Radiation Therapy, NOS"), regimen_or_line_of_therapy = c(NA, NA), treatment_effect = c(NA, NA), thera…	not reported	Descending colon	734	22835	Adenocarcinoma, NOS	no	2011	No	NA	T3	1940-03-01	N0	M0	not reported	fea2d32f-850b-529c-a57a-93ef7dd28027	C18.6	Descending colon	Not Reported	not reported	Not Reported	19a00e4d-8f7e-5453-9253-6e11fd134297	white
TCGA-AD-6901-01A-11R-1928-07	TCGA-AD-6901	TCGA-AD-6901-01A	TP	Primary solid Tumor	TCGA-AD-6901-01A	1	Primary	8c74f301-7976-4c15-952d-660d53f1215d	TCGA-AD-6901	Primary Tumor	NA	Solid Tissue	released	FALSE	Tumor	Unknown	Not Reported	NA	NA	0.3	3252c7d1-76b7-41d7-8126-70fa2f20fdef	0.3	0.7	No	NA	0	list(days_to_treatment_end = c(NA, NA), days_to_treatment_start = c(NA, NA), treatment_id = c("b6eae999-313c-5197-8d1b-a9e7c29d7b29", "c44176df-a585-526c-b93f-22c91e2768a5"), submitter_id = c("TCGA-AD-6901_treatment_1", "TCGA-AD-6901_treatment"), treatment_type = c("Pharmaceutical Therapy, NOS", "Radiation Therapy, NOS"), regimen_or_line_of_therapy = c(NA, NA), treatment_effect = c(NA, NA), thera…	not reported	Cecum	31	28579	Adenocarcinoma, NOS	no	2011	No	7th	T3	1940-03-01	N0	MX	not reported	b82a29e8-d609-5639-9edf-3a1a9070c416	C18.0	Cecum	Not Reported	not reported	Not Reported	9d14e3ac-7b8c-56d1-8485-8151c8ef5ea4	white
TCGA-G4-6306-01A-11R-1774-07	TCGA-G4-6306	TCGA-G4-6306-01A	TP	Primary solid Tumor	TCGA-G4-6306-01A	1	Primary	66c10757-2011-40ae-8b77-2647785fd463	TCGA-G4-6306	Primary Tumor	NA	Solid Tissue	released	FALSE	Tumor	Unknown	Not Reported	NA	NA	0.4	563e9aa1-d970-4ca7-9a04-634f1ec8dc9c	0.3	0.4	No	NA	0	list(treatment_intent_type = c(NA, NA), updated_datetime = c("2019-07-31T18:41:33.293540-05:00", "2019-07-31T18:41:33.293540-05:00"), treatment_id = c("0a009952-3873-542e-af38-bdbe6457d588", "d05f24a3-f7a1-5e2b-8645-ecd576fd4fd0"), submitter_id = c("TCGA-G4-6306_treatment", "TCGA-G4-6306_treatment_1"), treatment_type = c("Radiation Therapy, NOS", "Pharmaceutical Therapy, NOS"), state = c("release…	not reported	Ascending colon	1359	26163	Adenocarcinoma, NOS	no	2007	No	6th	T2	1940-03-01	N0	M0	not reported	a42c1080-0386-5092-a10e-81f14ae7da15	C18.2	Ascending colon	Not Reported	not reported	Not Reported	26e2a589-5811-5c34-8e73-577f3dfa6228	white
TCGA-CM-6164-01A-11R-1653-07	TCGA-CM-6164	TCGA-CM-6164-01A	TP	Primary solid Tumor	TCGA-CM-6164-01A	1	Primary	170c1926-67d9-4237-b365-fe611ed1ee7f	TCGA-CM-6164	Primary Tumor	NA	Solid Tissue	released	FALSE	Tumor	Unknown	Not Reported	NA	NA	1.5	7a64ea09-bb1a-4665-8ef4-e6f689731373	0.6	2.5	No	Stage IIA	0	list(treatment_intent_type = c(NA, NA), updated_datetime = c("2019-07-31T18:30:13.081729-05:00", "2019-07-31T18:30:13.081729-05:00"), treatment_id = c("4a59bcc6-a2fc-5ebd-8801-016cdec0b0fa", "7b180d8a-3dd0-5d96-a533-f56a3b8e4647"), submitter_id = c("TCGA-CM-6164_treatment", "TCGA-CM-6164_treatment_1"), treatment_type = c("Radiation Therapy, NOS", "Pharmaceutical Therapy, NOS"), state = c("release…	not reported	Sigmoid colon	883	16802	Adenocarcinoma, NOS	no	2009	No	6th	T3	1940-03-01	N0	M0	not reported	e80e05ba-5267-5fee-bc18-fd16e1ef8fd5	C18.7	Sigmoid colon	Not Reported	not reported	Not Reported	56f753f0-270c-5c8d-9947-9324ec0a9242	white
TCGA-G4-6311-01A-11R-1723-07	TCGA-G4-6311	TCGA-G4-6311-01A	TP	Primary solid Tumor	TCGA-G4-6311-01A	1	Primary	baac9aeb-b124-47bc-a454-4026847eb3e3	TCGA-G4-6311	Primary Tumor	NA	Solid Tissue	released	FALSE	Tumor	Unknown	Not Reported	NA	NA	0.8	9b738535-d694-4f0e-9fad-f2e67d9ff126	0.3	1.5	No	Stage III	0	list(treatment_intent_type = c(NA, NA), updated_datetime = c("2019-07-31T18:31:06.786400-05:00", "2019-07-31T18:31:06.786400-05:00"), treatment_id = c("b77d60da-9ab2-53a4-ad1c-a178d8ae7283", "cf0d2f7e-3f14-58d6-8163-092f9743ba4b"), submitter_id = c("TCGA-G4-6311_treatment", "TCGA-G4-6311_treatment_1"), treatment_type = c("Radiation Therapy, NOS", "Pharmaceutical Therapy, NOS"), state = c("release…	not reported	Ascending colon	1199	29297	Adenocarcinoma, NOS	no	2008	No	6th	T3	1940-03-01	N1	MX	not reported	6313832d-c512-525d-9672-38a8d0a14339	C18.2	Ascending colon	Not Reported	not reported	Not Reported	acec61e3-4e61-53f3-bd01-4ea5607a90f3	white
TCGA-CM-4751-01A-02R-1839-07	TCGA-CM-4751	TCGA-CM-4751-01A	TP	Primary solid Tumor	TCGA-CM-4751-01A	1	Primary	a08a26d6-153c-4e79-a4cc-dbbe1620dc8f	TCGA-CM-4751	Primary Tumor	NA	Solid Tissue	released	FALSE	Tumor	Unknown	Not Reported	NA	NA	0.6	c1b8b7f6-bfdc-4e4f-be9a-5b752390efc0	0.2	1.5	No	Stage IIIB	0	list(days_to_treatment_end = c(NA, NA), days_to_treatment_start = c(NA, NA), treatment_id = c("8b7074e7-222e-5002-a50c-789be99b74d1", "96f10618-8648-54df-9ea2-ba85e6564ce8"), submitter_id = c("TCGA-CM-4751_treatment_1", "TCGA-CM-4751_treatment"), treatment_type = c("Pharmaceutical Therapy, NOS", "Radiation Therapy, NOS"), regimen_or_line_of_therapy = c(NA, NA), treatment_effect = c(NA, NA), thera…	not reported	Cecum	822	22891	Adenocarcinoma, NOS	no	2009	No	7th	T3	1940-03-01	N1b	M0	not reported	af83fcc1-98a9-5b9f-9b3d-e5023da9048d	C18.0	Cecum	Not Reported	not reported	Not Reported	f3e5c498-3f84-5d4f-b9b2-f216eb213a64	white
TCGA-AA-A03J-01A-21R-A16W-07	TCGA-AA-A03J	TCGA-AA-A03J-01A	TP	Primary solid Tumor	TCGA-AA-A03J-01A	1	Primary	2ea59e5d-2191-44f4-b70b-8b180e805b8d	TCGA-AA-A03J	Primary Tumor	FALSE	Solid Tissue	released	FALSE	Tumor	Unknown	Not Reported	2193	700	NA	DECA4002-D8E2-42A2-817C-BCDDA0DB5B7B	NA	NA	No	Stage I	0	list(days_to_treatment_end = c(NA, NA), days_to_treatment_start = c(NA, NA), treatment_id = c("2b61e520-a9b9-5aa7-a62d-c0a6e9bdd6d0", "4d42b325-e0e9-58dc-bc81-4c1f52f2a0cf"), submitter_id = c("TCGA-AA-A03J_treatment_1", "TCGA-AA-A03J_treatment"), treatment_type = c("Pharmaceutical Therapy, NOS", "Radiation Therapy, NOS"), regimen_or_line_of_therapy = c(NA, NA), treatment_effect = c(NA, NA), thera…	not reported	Sigmoid colon	1246	23986	Adenocarcinoma, NOS	no	2004	No	5th	T2	1940-03-01	N0	M0	not reported	53fa973b-8404-5207-9aa5-ce434cdeb97e	C18.7	Sigmoid colon	Not Reported	not reported	Not Reported	aa116243-d81c-5178-bb4e-56e409057f68	not reported
TCGA-AA-3655-01A-02R-1723-07	TCGA-AA-3655	TCGA-AA-3655-01A	TP	Primary solid Tumor	TCGA-AA-3655-01A	1	Primary	41192387-8da9-4bd2-be0f-f74157e7bab9	TCGA-AA-3655	Primary Tumor	NA	Solid Tissue	released	FALSE	Tumor	Unknown	Not Reported	NA	NA	0.7	595cecd4-765b-4ec9-8be1-c971a6840904	0.3	1	No	Stage II	0	list(days_to_treatment_end = c(NA, NA), days_to_treatment_start = c(NA, NA), treatment_id = c("4e0ee602-6620-50e2-8c2c-ed461d3efc4c", "d444cf54-85de-5723-823f-2d43c8043ef9"), submitter_id = c("TCGA-AA-3655_treatment_1", "TCGA-AA-3655_treatment"), treatment_type = c("Pharmaceutical Therapy, NOS", "Radiation Therapy, NOS"), regimen_or_line_of_therapy = c(NA, NA), treatment_effect = c(NA, NA), thera…	not reported	Sigmoid colon	1856	24896	Adenocarcinoma, NOS	no	2005	No	5th	T3	1940-03-01	N0	M0	not reported	2be5eb4c-da5b-5987-adf9-6f89e1dc97de	C18.7	Sigmoid colon	Not Reported	not reported	Not Reported	4b00c9cf-301a-5ca7-8905-a7229fddb53a	not reported
TCGA-CM-5862-01A-01R-1653-07	TCGA-CM-5862	TCGA-CM-5862-01A	TP	Primary solid Tumor	TCGA-CM-5862-01A	1	Primary	e7390b8c-fc12-43f1-8c94-f5daf0d186f7	TCGA-CM-5862	Primary Tumor	NA	Solid Tissue	released	FALSE	Tumor	Unknown	Not Reported	NA	NA	0.9	5679df5f-fc93-45c4-84ee-b4b4350b6b51	0.4	1	No	Stage IVA	0	list(treatment_intent_type = c(NA, NA), updated_datetime = c("2019-07-31T18:42:23.122622-05:00", "2019-07-31T18:42:23.122622-05:00"), treatment_id = c("3ce23852-519f-57a3-9374-6eedcf61c552", "ac755304-fe50-5d8e-b377-09327cbeb88b"), submitter_id = c("TCGA-CM-5862_treatment", "TCGA-CM-5862_treatment_1"), treatment_type = c("Radiation Therapy, NOS", "Pharmaceutical Therapy, NOS"), state = c("release…	not reported	Ascending colon	NA	29493	Adenocarcinoma, NOS	no	2010	No	7th	T3	1940-03-01	N1a	M1a	not reported	24bad2de-65c7-5d7e-9e37-d66e42c6081b	C18.2	Ascending colon	Not Reported	not reported	Not Reported	de8d19b1-a3d5-5f4b-869b-7e85747fbd71	white
TCGA-G4-6317-02A-11R-2066-07	TCGA-G4-6317	TCGA-G4-6317-02A	TR	Recurrent Solid Tumor	TCGA-G4-6317-02A	2	Recurrence	45c8544c-ec60-447e-91ee-62e41e72a82f	TCGA-G4-6317	Recurrent Tumor	NA	Solid Tissue	released	FALSE	Tumor	Unknown	Not Reported	NA	NA	0.2	83F2C05D-6A43-433C-A7BC-EC62F4B82E6D	0.1	1.1	No	Stage IIIC	0	list(days_to_treatment_end = c(NA, NA), days_to_treatment_start = c(NA, NA), treatment_id = c("4fab38ba-ab7b-5012-bec3-721c2e157bfa", "b7024056-8533-5bc3-9327-402b53af84c8"), submitter_id = c("TCGA-G4-6317_treatment_1", "TCGA-G4-6317_treatment"), treatment_type = c("Pharmaceutical Therapy, NOS", "Radiation Therapy, NOS"), regimen_or_line_of_therapy = c(NA, NA), treatment_effect = c(NA, NA), thera…	not reported	Sigmoid colon	1095	18822	Adenocarcinoma, NOS	no	2008	No	6th	T3	1940-03-01	N2	MX	not reported	b7922aa1-5b26-5ed2-86d0-6a25da7b15da	C18.7	Sigmoid colon	Not Reported	not reported	Not Reported	9a1a1f4d-9ad0-5226-bae3-59d3c6ed0221	white
TCGA-AA-3812-01A-01R-0905-07	TCGA-AA-3812	TCGA-AA-3812-01A	TP	Primary solid Tumor	TCGA-AA-3812-01A	1	Primary	98ad41d5-fd77-4f30-94b5-03bf7b9c69b9	TCGA-AA-3812	Primary Tumor	NA	Solid Tissue	released	FALSE	Tumor	Unknown	Not Reported	NA	NA	0.8	4393113d-6c83-4763-a258-96ab9b8f604d	0.3	1.3	No	Stage IIA	0	list(treatment_intent_type = c(NA, NA), updated_datetime = c("2019-07-31T18:27:43.749797-05:00", "2019-07-31T18:27:43.749797-05:00"), treatment_id = c("28cb17e6-4585-53d0-b734-25ad60387de4", "38dd3b70-0487-56b4-a2dc-78b42685c682"), submitter_id = c("TCGA-AA-3812_treatment", "TCGA-AA-3812_treatment_1"), treatment_type = c("Radiation Therapy, NOS", "Pharmaceutical Therapy, NOS"), state = c("release…	not reported	Sigmoid colon	1066	29980	Adenocarcinoma, NOS	no	2007	No	6th	T3	1940-03-01	N0	M0	not reported	168d0332-9b37-53f6-a3c8-bb9e0c3a22aa	C18.7	Sigmoid colon	Not Reported	not reported	Not Reported	0aacb41f-c205-545b-a189-f2b095a1de06	not reported
TCGA-AZ-4323-01A-21R-1839-07	TCGA-AZ-4323	TCGA-AZ-4323-01A	TP	Primary solid Tumor	TCGA-AZ-4323-01A	1	Primary	1cd9614d-c2eb-4146-a4ff-adefcdad7315	TCGA-AZ-4323	Primary Tumor	NA	Solid Tissue	released	FALSE	Tumor	Unknown	Not Reported	NA	NA	0.8	0ccfd95b-a393-4c2a-90bb-f563eec83e9b	0.4	1.5	No	Stage IV	0	list(treatment_intent_type = c(NA, NA), updated_datetime = c("2019-07-31T18:36:25.899595-05:00", "2019-07-31T18:36:25.899595-05:00"), treatment_id = c("5218bf03-6acb-5789-9dd4-ab2fea75a17d", "fa82469a-bf07-5d90-9cbd-5cafb10588be"), submitter_id = c("TCGA-AZ-4323_treatment", "TCGA-AZ-4323_treatment_1"), treatment_type = c("Radiation Therapy, NOS", "Pharmaceutical Therapy, NOS"), state = c("release…	not reported	Cecum	NA	13755	Adenocarcinoma, NOS	no	2002	No	NA	T4	1940-03-01	N2	M1	not reported	77454d92-f720-56ea-8268-ca4ae9ddb755	C18.0	Cecum	Not Reported	not reported	Not Reported	9df41503-0f97-5361-a6e0-057654f6e4ff	white
TCGA-G4-6317-01A-11R-1723-07	TCGA-G4-6317	TCGA-G4-6317-01A	TP	Primary solid Tumor	TCGA-G4-6317-01A	1	Primary	ef88e2b5-41f4-4d62-ac3d-d10ec8192778	TCGA-G4-6317	Primary Tumor	NA	Solid Tissue	released	FALSE	Tumor	Unknown	Not Reported	NA	NA	0.4	852f4165-5450-4ba2-9042-1ac863f0ca90	0.4	1.3	No	Stage IIIC	0	list(days_to_treatment_end = c(NA, NA), days_to_treatment_start = c(NA, NA), treatment_id = c("4fab38ba-ab7b-5012-bec3-721c2e157bfa", "b7024056-8533-5bc3-9327-402b53af84c8"), submitter_id = c("TCGA-G4-6317_treatment_1", "TCGA-G4-6317_treatment"), treatment_type = c("Pharmaceutical Therapy, NOS", "Radiation Therapy, NOS"), regimen_or_line_of_therapy = c(NA, NA), treatment_effect = c(NA, NA), thera…	not reported	Sigmoid colon	1095	18822	Adenocarcinoma, NOS	no	2008	No	6th	T3	1940-03-01	N2	MX	not reported	b7922aa1-5b26-5ed2-86d0-6a25da7b15da	C18.7	Sigmoid colon	Not Reported	not reported	Not Reported	9a1a1f4d-9ad0-5226-bae3-59d3c6ed0221	white
TCGA-A6-3810-01A-01R-1022-07	TCGA-A6-3810	TCGA-A6-3810-01A	TP	Primary solid Tumor	TCGA-A6-3810-01A	1	Primary	f2bd44d3-a53c-4a10-9ae1-a93e762f174c	TCGA-A6-3810	Primary Tumor	NA	Solid Tissue	released	FALSE	Tumor	Unknown	Not Reported	NA	NA	1	d45c776b-26a5-406a-a4fe-f90896646611	0.5	2.2	No	Stage IIA	0	list(treatment_intent_type = c(NA, NA), updated_datetime = c("2019-07-31T15:15:04.148193-05:00", "2019-07-31T15:15:04.148193-05:00"), treatment_id = c("8e1c3e76-7ca5-5e10-a8ac-9d9f7b165d61", "c433e194-a1ce-5ef9-a4d5-1ef334d23435"), submitter_id = c("TCGA-A6-3810_treatment", "TCGA-A6-3810_treatment_1"), treatment_type = c("Radiation Therapy, NOS", "Pharmaceutical Therapy, NOS"), state = c("release…	not reported	Colon, NOS	1111	22999	Adenocarcinoma, NOS	no	2009	No	NA	T3	1940-03-01	N0	M0	not reported	6686205a-ba93-5e31-b2d6-4be973d595ee	C18.9	Colon, NOS	Not Reported	not reported	Not Reported	4085545c-fa8b-5dda-b425-07ca17e1edb5	white
TCGA-A6-3810-01B-04R-A277-07	TCGA-A6-3810	TCGA-A6-3810-01B	TP	Primary solid Tumor	TCGA-A6-3810-01B	1	Primary	996d2576-2f47-42b3-84dd-80448843abd6	TCGA-A6-3810	Primary Tumor	FALSE	Solid Tissue	released	TRUE	Tumor	FFPE	Not Reported	706	NA	NA	d45c776b-26a5-406a-a4fe-f90896646611	NA	NA	No	Stage IIA	0	list(treatment_intent_type = c(NA, NA), updated_datetime = c("2019-07-31T15:15:04.148193-05:00", "2019-07-31T15:15:04.148193-05:00"), treatment_id = c("8e1c3e76-7ca5-5e10-a8ac-9d9f7b165d61", "c433e194-a1ce-5ef9-a4d5-1ef334d23435"), submitter_id = c("TCGA-A6-3810_treatment", "TCGA-A6-3810_treatment_1"), treatment_type = c("Radiation Therapy, NOS", "Pharmaceutical Therapy, NOS"), state = c("release…	not reported	Colon, NOS	1111	22999	Adenocarcinoma, NOS	no	2009	No	NA	T3	1940-03-01	N0	M0	not reported	6686205a-ba93-5e31-b2d6-4be973d595ee	C18.9	Colon, NOS	Not Reported	not reported	Not Reported	4085545c-fa8b-5dda-b425-07ca17e1edb5	white
TCGA-CM-4752-01A-01R-1410-07	TCGA-CM-4752	TCGA-CM-4752-01A	TP	Primary solid Tumor	TCGA-CM-4752-01A	1	Primary	5703f0d8-db96-40ce-8009-51d2ec188abf	TCGA-CM-4752	Primary Tumor	NA	Solid Tissue	released	FALSE	Tumor	Unknown	Not Reported	NA	NA	1.2	121ae2cb-7fd4-4343-80ce-77fd001b1787	0.2	2.1	No	Stage IIA	0	list(days_to_treatment_end = c(NA, NA), days_to_treatment_start = c(NA, NA), treatment_id = c("12991c19-a44d-506c-847c-5870c53681bd", "532534f6-e6c1-53bd-9d6d-6de7758d6803"), submitter_id = c("TCGA-CM-4752_treatment_1", "TCGA-CM-4752_treatment"), treatment_type = c("Pharmaceutical Therapy, NOS", "Radiation Therapy, NOS"), regimen_or_line_of_therapy = c(NA, NA), treatment_effect = c(NA, NA), thera…	not reported	Ascending colon	396	21519	Adenocarcinoma, NOS	no	2010	No	NA	T3	1940-03-01	N0	M0	not reported	ebbf6f30-948e-5b00-a24d-408d89366428	C18.2	Ascending colon	Not Reported	not reported	Not Reported	e496cc36-42df-5e81-b8c0-a824ab8fa96e	black or african american
TCGA-D5-6537-01A-11R-1723-07	TCGA-D5-6537	TCGA-D5-6537-01A	TP	Primary solid Tumor	TCGA-D5-6537-01A	1	Primary	849016dc-fea2-4d92-9bee-24f41fa625e0	TCGA-D5-6537	Primary Tumor	NA	Solid Tissue	released	FALSE	Tumor	Unknown	Not Reported	NA	NA	0.9	f05f81cd-fc57-4be5-a21d-f41e00449893	0.8	1	No	Stage IIIB	0	list(days_to_treatment_end = c(NA, NA), days_to_treatment_start = c(NA, NA), treatment_id = c("76692a06-1098-54b3-b974-79583416230f", "d07ccad2-180e-5520-979a-b702d0b35ced"), submitter_id = c("TCGA-D5-6537_treatment_1", "TCGA-D5-6537_treatment"), treatment_type = c("Pharmaceutical Therapy, NOS", "Radiation Therapy, NOS"), regimen_or_line_of_therapy = c(NA, NA), treatment_effect = c(NA, NA), thera…	not reported	Transverse colon	137	23381	Adenocarcinoma, NOS	no	2010	No	7th	T3	1940-03-01	N1a	MX	not reported	ea332b9d-93f4-55fa-8a52-4387a0e55de3	C18.4	Transverse colon	Not Reported	not reported	Not Reported	f110c278-9966-5909-abff-0420ea563334	white
TCGA-AA-3854-01A-01R-0905-07	TCGA-AA-3854	TCGA-AA-3854-01A	TP	Primary solid Tumor	TCGA-AA-3854-01A	1	Primary	a1d1c0a9-8f09-4a3b-8e3a-b898bae89a77	TCGA-AA-3854	Primary Tumor	NA	Solid Tissue	released	FALSE	Tumor	Unknown	Not Reported	NA	NA	0.8	da5ac5a8-184c-4d2f-b0c4-5d2e8e3b7580	0.4	0.9	No	Stage I	0	list(treatment_intent_type = c(NA, NA), updated_datetime = c("2019-07-31T18:31:09.875019-05:00", "2019-07-31T18:31:09.875019-05:00"), treatment_id = c("054d6e13-1436-5649-a365-5f6462a1b8d4", "1e976188-4746-57a6-839a-8f0f8e1031e5"), submitter_id = c("TCGA-AA-3854_treatment", "TCGA-AA-3854_treatment_1"), treatment_type = c("Radiation Therapy, NOS", "Pharmaceutical Therapy, NOS"), state = c("release…	not reported	Colon, NOS	1096	26022	Mucinous adenocarcinoma	no	2009	No	6th	T2	1980-03-01	N0	M0	not reported	8aabaacd-47cb-5be4-8835-07de88108f7e	C18.9	Colon, NOS	Not Reported	not reported	Not Reported	dafc17c9-b1d8-520b-a79f-cbd81ba8a5a1	not reported
TCGA-D5-6926-01A-11R-1928-07	TCGA-D5-6926	TCGA-D5-6926-01A	TP	Primary solid Tumor	TCGA-D5-6926-01A	1	Primary	a3d5af60-a1f3-4345-ace3-c000367aecc0	TCGA-D5-6926	Primary Tumor	NA	Solid Tissue	released	FALSE	Tumor	Unknown	Not Reported	NA	NA	0.7	e5257ac1-cda4-460e-8959-bc4f221e2c6e	0.6	0.7	No	Stage IIIB	0	list(treatment_intent_type = c(NA, NA), updated_datetime = c("2019-07-31T18:27:06.830152-05:00", "2019-07-31T18:27:06.830152-05:00"), treatment_id = c("3cd53094-f6f2-56bd-a5cb-1a884d20ddde", "d8610333-04ea-5517-b5a9-e450d96735c1"), submitter_id = c("TCGA-D5-6926_treatment", "TCGA-D5-6926_treatment_1"), treatment_type = c("Radiation Therapy, NOS", "Pharmaceutical Therapy, NOS"), state = c("release…	not reported	Sigmoid colon	275	23768	Adenocarcinoma, NOS	no	2011	No	7th	T4a	1940-03-01	N1	M0	not reported	a870b13e-6340-54c5-b7aa-89ea5b082740	C18.7	Sigmoid colon	Not Reported	not reported	Not Reported	4df885c2-8b59-52f9-9d72-5282989d7403	white
TCGA-A6-2672-01B-03R-2302-07	TCGA-A6-2672	TCGA-A6-2672-01B	TP	Primary solid Tumor	TCGA-A6-2672-01B	1	Primary	fd3910f9-8c51-4ea8-8816-35f5e8c6f3d2	TCGA-A6-2672	Primary Tumor	NA	Solid Tissue	released	TRUE	Tumor	FFPE	Not Reported	NA	NA	NA	8405a327-719d-4c6d-99f4-a58306c8fdc4	NA	NA	No	Stage IIIB	0	list(days_to_treatment_end = c(NA, NA), days_to_treatment_start = c(NA, NA), treatment_id = c("c58cffd6-9c82-50e2-8bbd-eceb4d57e940", "f78e7d8d-64f7-5c68-a701-517e6b271774"), submitter_id = c("TCGA-A6-2672_treatment_1", "TCGA-A6-2672_treatment"), treatment_type = c("Pharmaceutical Therapy, NOS", "Radiation Therapy, NOS"), regimen_or_line_of_therapy = c(NA, NA), treatment_effect = c(NA, NA), thera…	not reported	Colon, NOS	1419	30237	Adenocarcinoma, NOS	no	2009	No	NA	T3	1940-03-01	N1	M0	not reported	e44a132f-749a-5557-bf02-ed71326b0393	C18.2	Cecum	Not Reported	not reported	Not Reported	f6e0dd1b-5833-5c9d-82f1-c2df35fbc328	white
TCGA-AA-3966-01A-01R-1113-07	TCGA-AA-3966	TCGA-AA-3966-01A	TP	Primary solid Tumor	TCGA-AA-3966-01A	1	Primary	8c5799bf-db65-40f6-9a67-abd4da4025f2	TCGA-AA-3966	Primary Tumor	NA	Solid Tissue	released	FALSE	Tumor	Unknown	Not Reported	NA	NA	0.6	d2c3087b-9b52-4958-859a-f2ee18ffe6a3	0.2	0.9	No	Stage IIA	0	list(days_to_treatment_end = c(NA, NA), days_to_treatment_start = c(NA, NA), treatment_id = c("77e0c69a-9f89-5bd5-b36e-a3121f1307f6", "8be4a587-9af2-586a-8e20-b88666a620af"), submitter_id = c("TCGA-AA-3966_treatment_1", "TCGA-AA-3966_treatment"), treatment_type = c("Pharmaceutical Therapy, NOS", "Radiation Therapy, NOS"), regimen_or_line_of_therapy = c(NA, NA), treatment_effect = c(NA, NA), thera…	not reported	Colon, NOS	61	32537	Mucinous adenocarcinoma	no	2009	No	6th	T3	1980-03-01	N0	M0	not reported	d180dffc-341f-5349-ada4-75a90c0b70a9	C18.9	Colon, NOS	Not Reported	not reported	Not Reported	33ceb87a-d5ba-5c0d-8ef1-5bd5bd53dcd1	not reported
TCGA-AA-A00J-01A-02R-A002-07	TCGA-AA-A00J	TCGA-AA-A00J-01A	TP	Primary solid Tumor	TCGA-AA-A00J-01A	1	Primary	bfee6527-99cc-460e-879e-fa7a46e8e0d5	TCGA-AA-A00J	Primary Tumor	FALSE	Solid Tissue	released	FALSE	Tumor	Unknown	Not Reported	326	520	NA	A207E6D8-FF21-49FD-A84B-D941C85A8631	NA	NA	No	Stage IIIB	0	list(treatment_intent_type = c(NA, NA), updated_datetime = c("2019-07-31T15:53:34.727339-05:00", "2019-07-31T15:53:34.727339-05:00"), treatment_id = c("bf260065-f720-5558-8c6c-c48164a477d1", "fd6d4bfa-5763-5289-b92d-019937fa87d0"), submitter_id = c("TCGA-AA-A00J_treatment", "TCGA-AA-A00J_treatment_1"), treatment_type = c("Radiation Therapy, NOS", "Pharmaceutical Therapy, NOS"), state = c("release…	not reported	Ascending colon	549	29371	Mucinous adenocarcinoma	no	2009	No	6th	T4	1980-03-01	N1	M0	not reported	53cf1c88-4c17-55ce-9215-0cacf97aba53	C18.2	Ascending colon	Not Reported	not reported	Not Reported	acf9b92a-9386-5d01-b78e-796e6aa58492	not reported
TCGA-AA-3994-01A-01R-1113-07	TCGA-AA-3994	TCGA-AA-3994-01A	TP	Primary solid Tumor	TCGA-AA-3994-01A	1	Primary	41933a62-1325-4089-80b5-06e3ebb238da	TCGA-AA-3994	Primary Tumor	NA	Solid Tissue	released	FALSE	Tumor	Unknown	Not Reported	NA	NA	0.7	55c50c9d-4520-4bd3-8abf-31fe50ec5537	0.2	0.8	No	Stage IIIB	0	list(days_to_treatment_end = c(NA, NA), days_to_treatment_start = c(NA, NA), treatment_id = c("e76cc591-9fc7-5084-a4ce-530aa7446090", "f0efbc27-487c-53e1-a28d-ffdc08e25841"), submitter_id = c("TCGA-AA-3994_treatment_1", "TCGA-AA-3994_treatment"), treatment_type = c("Pharmaceutical Therapy, NOS", "Radiation Therapy, NOS"), regimen_or_line_of_therapy = c(NA, NA), treatment_effect = c(NA, NA), thera…	not reported	Colon, NOS	822	25323	Mucinous adenocarcinoma	no	2008	No	6th	T3	1980-03-01	N1	M0	not reported	4ee499b4-f7bc-5ba2-a884-ae1c1adac3d8	C18.9	Colon, NOS	Not Reported	not reported	Not Reported	0f2f193f-5512-52bd-83b4-3aaa4e64faf8	not reported
TCGA-D5-6540-01A-11R-1723-07	TCGA-D5-6540	TCGA-D5-6540-01A	TP	Primary solid Tumor	TCGA-D5-6540-01A	1	Primary	201b6b48-418f-48a3-a568-6e851f85c25e	TCGA-D5-6540	Primary Tumor	NA	Solid Tissue	released	FALSE	Tumor	Unknown	Not Reported	NA	NA	0.6	bc47b112-83c6-4192-a914-9c885aeed438	0.6	0.8	No	Stage I	0	list(days_to_treatment_end = c(NA, NA), days_to_treatment_start = c(NA, NA), treatment_id = c("8716487a-acf0-5d7c-a498-d9843f6fba22", "cc37f1e9-3a5b-5adf-a475-ac3f7170adbb"), submitter_id = c("TCGA-D5-6540_treatment_1", "TCGA-D5-6540_treatment"), treatment_type = c("Pharmaceutical Therapy, NOS", "Radiation Therapy, NOS"), regimen_or_line_of_therapy = c(NA, NA), treatment_effect = c(NA, NA), thera…	not reported	Cecum	491	24282	Mucinous adenocarcinoma	no	2010	No	NA	T2	1980-03-01	N0	M0	not reported	72fac932-4563-5f25-b1ca-4cb49c11fd2d	C18.0	Cecum	Not Reported	not reported	Not Reported	384399cb-0f06-50db-86f6-a788c95e37a1	white
TCGA-AA-3949-01A-01R-1022-07	TCGA-AA-3949	TCGA-AA-3949-01A	TP	Primary solid Tumor	TCGA-AA-3949-01A	1	Primary	1a4601f8-e4d6-4c3d-a846-e3186295c137	TCGA-AA-3949	Primary Tumor	NA	Solid Tissue	released	FALSE	Tumor	Unknown	Not Reported	NA	NA	0.7	09fa9d57-dd74-4902-a007-ec77402dbd0d	0.2	0.8	No	Stage IIIB	0	list(days_to_treatment_end = c(NA, NA), days_to_treatment_start = c(NA, NA), treatment_id = c("0a46731b-a930-59b8-828f-9d54e95bb468", "7315135f-faba-5b11-889b-13861c357d9f"), submitter_id = c("TCGA-AA-3949_treatment_1", "TCGA-AA-3949_treatment"), treatment_type = c("Pharmaceutical Therapy, NOS", "Radiation Therapy, NOS"), regimen_or_line_of_therapy = c(NA, NA), treatment_effect = c(NA, NA), thera…	not reported	Ascending colon	791	32081	Mucinous adenocarcinoma	no	2009	No	6th	T3	1980-03-01	N1	M0	not reported	21646236-9cf4-5310-97dd-7622cddcd25c	C18.2	Ascending colon	Not Reported	not reported	Not Reported	2722abec-3f54-58f5-9c8f-3c752df269a1	not reported
TCGA-AA-3542-01A-02R-1873-07	TCGA-AA-3542	TCGA-AA-3542-01A	TP	Primary solid Tumor	TCGA-AA-3542-01A	1	Primary	9110e2e7-fa66-476c-9421-c849d875fcb6	TCGA-AA-3542	Primary Tumor	NA	Solid Tissue	released	FALSE	Tumor	Unknown	Not Reported	NA	NA	0.6	c13d322b-8984-440d-a279-4a3253a16f80	0.4	0.8	No	Stage IIIC	0	list(days_to_treatment_end = c(NA, NA), days_to_treatment_start = c(NA, NA), treatment_id = c("ce901834-f0cf-527b-802d-292c2ba2bfd4", "e7ccb412-5ed0-5d8b-8df9-7501ca9c78fa"), submitter_id = c("TCGA-AA-3542_treatment_1", "TCGA-AA-3542_treatment"), treatment_type = c("Pharmaceutical Therapy, NOS", "Radiation Therapy, NOS"), regimen_or_line_of_therapy = c(NA, NA), treatment_effect = c(NA, NA), thera…	not reported	Sigmoid colon	395	25324	Adenocarcinoma, NOS	no	2008	No	6th	T3	1940-03-01	N2	M0	not reported	3e65f9a6-e7f3-5d3f-b56f-a64a91d1e051	C18.7	Sigmoid colon	Not Reported	not reported	Not Reported	5813e71d-48cd-59bd-af06-40ade842b2b4	not reported
TCGA-AA-3679-01A-02R-0905-07	TCGA-AA-3679	TCGA-AA-3679-01A	TP	Primary solid Tumor	TCGA-AA-3679-01A	1	Primary	be4bb915-7700-43e8-a640-ad77faf54f41	TCGA-AA-3679	Primary Tumor	NA	Solid Tissue	released	FALSE	Tumor	Unknown	Not Reported	NA	NA	0.5	c425b16d-b52d-4272-bc6b-73005a14d84e	0.4	0.8	No	Stage IV	0	list(days_to_treatment_end = c(NA, NA), days_to_treatment_start = c(NA, NA), treatment_id = c("6f264b7a-0fcf-5f8e-afc6-af883def097c", "c7ace739-f023-59cb-a34e-d29abd001424"), submitter_id = c("TCGA-AA-3679_treatment_1", "TCGA-AA-3679_treatment"), treatment_type = c("Pharmaceutical Therapy, NOS", "Radiation Therapy, NOS"), regimen_or_line_of_therapy = c(NA, NA), treatment_effect = c(NA, NA), thera…	not reported	Colon, NOS	457	21611	Adenocarcinoma, NOS	no	2006	No	6th	T3	1940-03-01	N2	M1	not reported	70eb2832-f00d-550a-900c-21a207b4a909	C18.9	Colon, NOS	Not Reported	not reported	Not Reported	80d54d3d-c7fa-578a-8797-e353bea53d1e	not reported
TCGA-AA-3514-11A-01R-A32Z-07	TCGA-AA-3514	TCGA-AA-3514-11A	NT	Solid Tissue Normal	TCGA-AA-3514-11A	11	Not Applicable	9681eb58-de63-473b-85b8-91bdd07d5f45	TCGA-AA-3514	Solid Tissue Normal	NA	Solid Tissue	released	FALSE	Normal	Unknown	Not Reported	NA	NA	0.6	NA	0.4	0.6	No	Stage I	0	list(treatment_intent_type = c(NA, NA), updated_datetime = c("2019-07-31T18:38:44.655149-05:00", "2019-07-31T18:38:44.655149-05:00"), treatment_id = c("22e97da3-53cf-55e9-b2e8-c5f52782bcfa", "6455f318-082a-51eb-a9d8-e7179e885d1f"), submitter_id = c("TCGA-AA-3514_treatment", "TCGA-AA-3514_treatment_1"), treatment_type = c("Radiation Therapy, NOS", "Pharmaceutical Therapy, NOS"), state = c("release…	not reported	Colon, NOS	31	29738	Adenocarcinoma, NOS	no	2006	No	6th	T2	1940-03-01	N0	M0	not reported	b2c0656f-311b-59ab-aefd-bf25cd66afcd	C18.9	Colon, NOS	Not Reported	not reported	Not Reported	f2aed90f-4587-59f2-83f4-48bcacfcdb51	not reported
TCGA-AA-3514-01A-02R-0821-07	TCGA-AA-3514	TCGA-AA-3514-01A	TP	Primary solid Tumor	TCGA-AA-3514-01A	1	Primary	a657afdb-5322-454f-8dd7-8397291401c5	TCGA-AA-3514	Primary Tumor	NA	Solid Tissue	released	FALSE	Tumor	Unknown	Not Reported	NA	NA	0.7	fb5f0b24-da5d-4c30-b508-7d45cc48a4f8	0.5	1.2	No	Stage I	0	list(treatment_intent_type = c(NA, NA), updated_datetime = c("2019-07-31T18:38:44.655149-05:00", "2019-07-31T18:38:44.655149-05:00"), treatment_id = c("22e97da3-53cf-55e9-b2e8-c5f52782bcfa", "6455f318-082a-51eb-a9d8-e7179e885d1f"), submitter_id = c("TCGA-AA-3514_treatment", "TCGA-AA-3514_treatment_1"), treatment_type = c("Radiation Therapy, NOS", "Pharmaceutical Therapy, NOS"), state = c("release…	not reported	Colon, NOS	31	29738	Adenocarcinoma, NOS	no	2006	No	6th	T2	1940-03-01	N0	M0	not reported	b2c0656f-311b-59ab-aefd-bf25cd66afcd	C18.9	Colon, NOS	Not Reported	not reported	Not Reported	f2aed90f-4587-59f2-83f4-48bcacfcdb51	not reported
TCGA-A6-2686-01A-01R-A32Z-07	TCGA-A6-2686	TCGA-A6-2686-01A	TP	Primary solid Tumor	TCGA-A6-2686-01A	1	Primary	510e5040-0834-4b92-9277-d60b523a22e8	TCGA-A6-2686	Primary Tumor	NA	Solid Tissue	released	FALSE	Tumor	Unknown	Not Reported	NA	NA	0.9	cedebb2f-01b9-4bbd-9b4c-c9fa79f26e72	0.5	2.2	No	Stage IIA	0	list(treatment_intent_type = c(NA, NA), updated_datetime = c("2019-07-31T18:24:25.530554-05:00", "2019-07-31T18:24:25.530554-05:00"), treatment_id = c("b9c10f28-450f-582c-82a6-a2de77d10dec", "c75b2c45-1dd6-54b8-8678-1df96d938b58"), submitter_id = c("TCGA-A6-2686_treatment", "TCGA-A6-2686_treatment_1"), treatment_type = c("Radiation Therapy, NOS", "Pharmaceutical Therapy, NOS"), state = c("release…	not reported	Colon, NOS	488	29623	Adenocarcinoma, NOS	no	2009	No	6th	T3	1940-03-01	N0	M0	not reported	b2a175d4-c7ee-5a11-99d2-fbc2d42047db	C18.9	Colon, NOS	Not Reported	not reported	Not Reported	e06d83a2-b106-5cdf-ab65-af777f32769b	white
TCGA-CM-6171-01A-11R-1653-07	TCGA-CM-6171	TCGA-CM-6171-01A	TP	Primary solid Tumor	TCGA-CM-6171-01A	1	Primary	0b30934d-0c35-41a1-8a1c-8c5f6a9774d9	TCGA-CM-6171	Primary Tumor	NA	Solid Tissue	released	FALSE	Tumor	Unknown	Not Reported	NA	NA	1.5	806dcc4f-5392-4893-9d90-6238f91b5369	0.3	1.7	No	Stage I	0	list(days_to_treatment_end = c(NA, NA), days_to_treatment_start = c(NA, NA), treatment_id = c("b4ce1c0c-32eb-55b1-935b-f108adc1324b", "d265c7f8-7b5b-55d6-9562-d56008f8d4b6"), submitter_id = c("TCGA-CM-6171_treatment_1", "TCGA-CM-6171_treatment"), treatment_type = c("Pharmaceutical Therapy, NOS", "Radiation Therapy, NOS"), regimen_or_line_of_therapy = c(NA, NA), treatment_effect = c(NA, NA), thera…	not reported	Ascending colon	427	28307	Adenocarcinoma, NOS	no	2010	No	7th	T2	1940-03-01	N0	M0	not reported	731bfe8e-3661-5c00-b871-5e3af5c80143	C18.2	Ascending colon	Not Reported	not reported	Not Reported	60d8a707-0989-5b9b-ba7c-98cd23be35c3	white
TCGA-A6-5659-01A-01R-A278-07	TCGA-A6-5659	TCGA-A6-5659-01A	TP	Primary solid Tumor	TCGA-A6-5659-01A	1	Primary	7bbba7d3-c921-4063-8a82-3496aa6b89d5	TCGA-A6-5659	Primary Tumor	NA	Solid Tissue	released	FALSE	Tumor	Unknown	Not Reported	NA	NA	0.6	16172149-a834-4f41-a786-5d87a69fc65c	0.4	1.5	No	Stage I	0	list(treatment_intent_type = c(NA, NA), updated_datetime = c("2019-07-31T18:33:11.158741-05:00", "2019-07-31T18:33:11.158741-05:00"), treatment_id = c("34ca33a1-59da-55ed-a02b-c174f961f1ef", "e4c2ac8c-3e2c-5b97-bd59-9f3f0237a25a"), submitter_id = c("TCGA-A6-5659_treatment", "TCGA-A6-5659_treatment_1"), treatment_type = c("Radiation Therapy, NOS", "Pharmaceutical Therapy, NOS"), state = c("release…	not reported	Colon, NOS	926	30028	Adenocarcinoma, NOS	no	2010	No	NA	T2	1940-03-01	N0	M0	not reported	98c4bea5-1f9c-5c13-adc8-21ed84b5f07b	C18.2	Cecum	Not Reported	not reported	Not Reported	e9cc41ee-0309-53cd-a6a6-df68fc02b452	white
TCGA-A6-3808-01A-01R-1022-07	TCGA-A6-3808	TCGA-A6-3808-01A	TP	Primary solid Tumor	TCGA-A6-3808-01A	1	Primary	037ba047-2228-43de-8df8-32920a689eca	TCGA-A6-3808	Primary Tumor	NA	Solid Tissue	released	FALSE	Tumor	Unknown	Not Reported	NA	NA	0.8	e1505f65-72ef-438d-a5e1-93ed8bf6635d	0.5	1.4	No	Stage IIA	0	list(treatment_intent_type = c(NA, NA), updated_datetime = c("2019-07-31T18:28:14.006935-05:00", "2019-07-31T18:28:14.006935-05:00"), treatment_id = c("2bb6f439-18cb-5186-9fcd-b854b464e9d7", "e93a1477-7e97-564d-8e30-755cfec02326"), submitter_id = c("TCGA-A6-3808_treatment", "TCGA-A6-3808_treatment_1"), treatment_type = c("Radiation Therapy, NOS", "Pharmaceutical Therapy, NOS"), state = c("release…	not reported	Colon, NOS	1014	26666	Adenocarcinoma, NOS	no	2009	No	NA	T3	1940-03-01	N0	M0	not reported	083ad5a3-7fa9-5124-b1f2-d4780d6ba559	C18.9	Colon, NOS	Not Reported	not reported	Not Reported	807a70a9-dae1-55a9-a5c7-38a95b70a87c	white
TCGA-A6-5660-01A-01R-1653-07	TCGA-A6-5660	TCGA-A6-5660-01A	TP	Primary solid Tumor	TCGA-A6-5660-01A	1	Primary	1bc0790d-1383-43a2-920a-ae5c7205e518	TCGA-A6-5660	Primary Tumor	NA	Solid Tissue	released	FALSE	Tumor	Unknown	Not Reported	NA	NA	1	865dc724-445f-45a7-a143-5318f6acb580	0.5	1.5	No	Stage IIIC	0	list(days_to_treatment_end = c(NA, NA), days_to_treatment_start = c(NA, NA), treatment_id = c("6e14327d-c971-5b8e-8bcf-b2cb43118628", "f0a61184-ef55-578a-b605-e9bf240cbb3d"), submitter_id = c("TCGA-A6-5660_treatment_1", "TCGA-A6-5660_treatment"), treatment_type = c("Pharmaceutical Therapy, NOS", "Radiation Therapy, NOS"), regimen_or_line_of_therapy = c(NA, NA), treatment_effect = c(NA, NA), thera…	not reported	Colon, NOS	888	26803	Adenocarcinoma, NOS	no	2010	No	NA	T3	1940-03-01	N2b	M0	not reported	693ae9be-69c6-5238-8e90-27e8960b5d7b	C18.2	Cecum	Not Reported	not reported	Not Reported	0c893747-b6fc-59e6-966b-bcf59d7a115c	black or african american
TCGA-DM-A28M-01A-12R-A16W-07	TCGA-DM-A28M	TCGA-DM-A28M-01A	TP	Primary solid Tumor	TCGA-DM-A28M-01A	1	Primary	afc8d98d-6e58-461b-b771-c86486f9f012	TCGA-DM-A28M	Primary Tumor	FALSE	Solid Tissue	released	FALSE	Tumor	Unknown	Not Reported	2698	170	NA	0A659279-BA92-44AF-9E93-80457ADEC729	NA	NA	No	Stage IIA	0	list(days_to_treatment_end = c(NA, NA), days_to_treatment_start = c(NA, NA), treatment_id = c("46c7ae10-5016-5d5c-b043-338d75a077d9", "b9674b50-24a2-5d9a-b9e5-64be67c10752"), submitter_id = c("TCGA-DM-A28M_treatment_1", "TCGA-DM-A28M_treatment"), treatment_type = c("Pharmaceutical Therapy, NOS", "Radiation Therapy, NOS"), regimen_or_line_of_therapy = c(NA, NA), treatment_effect = c(NA, NA), thera…	not reported	Descending colon	2895	23043	Adenocarcinoma, NOS	no	2003	No	6th	T3	1940-03-01	N0	M0	not reported	d6c89b75-58be-5023-b55a-a367d1330a70	C18.6	Descending colon	Not Reported	not reported	Not Reported	94c4e13c-dca6-5ec7-b4ab-3c46611ab2e5	white
TCGA-AA-3663-01A-01R-1723-07	TCGA-AA-3663	TCGA-AA-3663-01A	TP	Primary solid Tumor	TCGA-AA-3663-01A	1	Primary	41411fc2-420a-425f-94bd-01a52a0402e0	TCGA-AA-3663	Primary Tumor	NA	Solid Tissue	released	FALSE	Tumor	Unknown	Not Reported	NA	NA	0.6	3910575f-6b8c-4f8f-9fa2-980d3e848081	0.2	1	No	Stage II	0	list(days_to_treatment_end = c(NA, NA), days_to_treatment_start = c(NA, NA), treatment_id = c("7b2ec202-26fb-5de1-9f02-e464decbbde3", "97d3fc0b-f536-525c-be4d-ed52ec41587e"), submitter_id = c("TCGA-AA-3663_treatment_1", "TCGA-AA-3663_treatment"), treatment_type = c("Pharmaceutical Therapy, NOS", "Radiation Therapy, NOS"), regimen_or_line_of_therapy = c(NA, NA), treatment_effect = c(NA, NA), thera…	not reported	Cecum	212	15675	Adenocarcinoma, NOS	no	2005	No	5th	T3	1940-03-01	N0	M0	not reported	adc29aad-bc6c-5ec7-8192-69c7c0515e3f	C18.0	Cecum	Not Reported	not reported	Not Reported	722293d2-0c59-59d3-99f7-8a3ec4497a7e	not reported
TCGA-A6-5661-01A-01R-1653-07	TCGA-A6-5661	TCGA-A6-5661-01A	TP	Primary solid Tumor	TCGA-A6-5661-01A	1	Primary	8bbfb052-46f4-46e6-8c34-e0b9923c3426	TCGA-A6-5661	Primary Tumor	NA	Solid Tissue	released	FALSE	Tumor	Unknown	Not Reported	NA	NA	0.8	bfa2520c-b8f1-4475-b98c-6798ecbf6f16	0.4	1.1	No	Stage IIA	0	list(days_to_treatment_end = c(NA, NA), days_to_treatment_start = c(NA, NA), treatment_id = c("0811c4f6-f44e-50fa-8f05-b480aa2a98e7", "0b79782b-0945-5abc-8fb3-e2d0b2f04708"), submitter_id = c("TCGA-A6-5661_treatment_1", "TCGA-A6-5661_treatment"), treatment_type = c("Pharmaceutical Therapy, NOS", "Radiation Therapy, NOS"), regimen_or_line_of_therapy = c(NA, NA), treatment_effect = c(NA, NA), thera…	not reported	Ascending colon	1020	29446	Adenocarcinoma, NOS	no	2010	No	NA	T3	1940-03-01	N0	M0	not reported	43747f68-3f64-5169-8744-6950c6bd54e0	C18.2	Ascending colon	Not Reported	not reported	Not Reported	fc8d26c9-4dcf-5eb0-9ef6-e5b7e7a9ff8b	black or african american
TCGA-CK-4951-01A-01R-1410-07	TCGA-CK-4951	TCGA-CK-4951-01A	TP	Primary solid Tumor	TCGA-CK-4951-01A	1	Primary	ea9e7e8c-4151-4cfc-8631-5880c6f1a21f	TCGA-CK-4951	Primary Tumor	NA	Solid Tissue	released	FALSE	Tumor	Unknown	Not Reported	NA	NA	0.3	2d3e5015-f38b-42ce-9466-cdd21a5b3701	0.1	0.5	No	Stage IIA	0	list(treatment_intent_type = c(NA, NA), updated_datetime = c("2019-07-31T18:26:07.709477-05:00", "2019-07-31T18:26:07.709477-05:00"), treatment_id = c("ad52bb6b-58f7-5e30-9cc0-85afb1d902fb", "ea58547e-1ae4-5a5e-ae92-dae18cde71c8"), submitter_id = c("TCGA-CK-4951_treatment", "TCGA-CK-4951_treatment_1"), treatment_type = c("Radiation Therapy, NOS", "Pharmaceutical Therapy, NOS"), state = c("release…	not reported	Cecum	2134	28982	Mucinous adenocarcinoma	no	2007	No	6th	T3	1980-03-01	N0	M0	not reported	fe3d8d09-badd-562f-a5a0-39a5d1f2eaea	C18.0	Ascending colon	Not Reported	not reported	Not Reported	2a9526d7-23a0-574a-9236-b8d23784c70f	white
TCGA-A6-5661-01B-05R-2302-07	TCGA-A6-5661	TCGA-A6-5661-01B	TP	Primary solid Tumor	TCGA-A6-5661-01B	1	Primary	7ff8b9ce-57b0-4e8d-8607-aef212854f56	TCGA-A6-5661	Primary Tumor	NA	Solid Tissue	released	TRUE	Tumor	FFPE	Not Reported	NA	NA	NA	bfa2520c-b8f1-4475-b98c-6798ecbf6f16	NA	NA	No	Stage IIA	0	list(days_to_treatment_end = c(NA, NA), days_to_treatment_start = c(NA, NA), treatment_id = c("0811c4f6-f44e-50fa-8f05-b480aa2a98e7", "0b79782b-0945-5abc-8fb3-e2d0b2f04708"), submitter_id = c("TCGA-A6-5661_treatment_1", "TCGA-A6-5661_treatment"), treatment_type = c("Pharmaceutical Therapy, NOS", "Radiation Therapy, NOS"), regimen_or_line_of_therapy = c(NA, NA), treatment_effect = c(NA, NA), thera…	not reported	Ascending colon	1020	29446	Adenocarcinoma, NOS	no	2010	No	NA	T3	1940-03-01	N0	M0	not reported	43747f68-3f64-5169-8744-6950c6bd54e0	C18.2	Ascending colon	Not Reported	not reported	Not Reported	fc8d26c9-4dcf-5eb0-9ef6-e5b7e7a9ff8b	black or african american
TCGA-DM-A1HB-01A-21R-A180-07	TCGA-DM-A1HB	TCGA-DM-A1HB-01A	TP	Primary solid Tumor	TCGA-DM-A1HB-01A	1	Primary	40b2b04e-371d-42ef-905e-5b9006384a65	TCGA-DM-A1HB	Primary Tumor	FALSE	Solid Tissue	released	FALSE	Tumor	Unknown	NA	3795	180	NA	B16DE561-4A84-4E00-AFF8-CA8A5203D6D0	NA	NA	No	Stage IIIB	0	list(treatment_intent_type = c(NA, NA), updated_datetime = c("2019-07-31T18:32:21.914136-05:00", "2019-07-31T18:32:21.914136-05:00"), treatment_id = c("2c0609ed-6294-580f-9078-a4e5667ddd71", "4b3e195f-5ad5-527e-bb36-2965d4eb0dff"), submitter_id = c("TCGA-DM-A1HB_treatment", "TCGA-DM-A1HB_treatment_1"), treatment_type = c("Radiation Therapy, NOS", "Pharmaceutical Therapy, NOS"), state = c("release…	not reported	Transverse colon	4126	27708	Mucinous adenocarcinoma	no	2000	No	NA	T3	1980-03-01	N1	M0	not reported	f17a5510-d76a-51e6-b625-3a6580727093	C18.4	Transverse colon	Not Reported	not reported	Not Reported	31595c07-dc1a-5ec4-bf45-1da72a4523b5	white
TCGA-AA-3492-01A-01R-1410-07	TCGA-AA-3492	TCGA-AA-3492-01A	TP	Primary solid Tumor	TCGA-AA-3492-01A	1	Primary	bb60b35b-cd5d-4f14-a7e0-c9af4f6f8c3c	TCGA-AA-3492	Primary Tumor	NA	Solid Tissue	released	FALSE	Tumor	Unknown	Not Reported	NA	NA	0.6	7c11bb51-9aab-4d92-848d-c10de65efbf0	0.4	0.9	No	Stage II	0	list(days_to_treatment_end = c(NA, NA), days_to_treatment_start = c(NA, NA), treatment_id = c("eac1a8c6-ad4c-5c8c-afa5-73402cb345ce", "f274c52b-5197-50b7-b260-ac4fac305422"), submitter_id = c("TCGA-AA-3492_treatment_1", "TCGA-AA-3492_treatment"), treatment_type = c("Pharmaceutical Therapy, NOS", "Radiation Therapy, NOS"), regimen_or_line_of_therapy = c(NA, NA), treatment_effect = c(NA, NA), thera…	not reported	Ascending colon	0	32871	Adenocarcinoma, NOS	no	2002	No	5th	T3	1940-03-01	N0	M0	not reported	91c2b535-5036-5573-9d47-454320daa117	C18.2	Ascending colon	Not Reported	not reported	Not Reported	48db598d-b4c5-5125-bcfe-98d59533e3bd	not reported
TCGA-AU-3779-01A-01R-1723-07	TCGA-AU-3779	TCGA-AU-3779-01A	TP	Primary solid Tumor	TCGA-AU-3779-01A	1	Primary	1f464f7c-dc4d-4dc2-8623-55233b9f994d	TCGA-AU-3779	Primary Tumor	NA	Solid Tissue	released	FALSE	Tumor	Unknown	Not Reported	NA	NA	0.4	8704ad3a-a420-41e3-a71e-4ca49dd90d32	0.1	1	No	Stage IIA	0	list(days_to_treatment_end = c(NA, NA), days_to_treatment_start = c(NA, NA), treatment_id = c("4921ebe4-4c06-5c20-928c-71fbce49aa60", "acd90055-f9a4-5541-8379-8495ab5c8f69"), submitter_id = c("TCGA-AU-3779_treatment_1", "TCGA-AU-3779_treatment"), treatment_type = c("Pharmaceutical Therapy, NOS", "Radiation Therapy, NOS"), regimen_or_line_of_therapy = c(NA, NA), treatment_effect = c(NA, NA), thera…	not reported	Sigmoid colon	441	29460	Adenocarcinoma, NOS	no	2010	No	7th	T3	1940-03-01	N0	M0	not reported	7db57a70-92d5-5aad-bd3e-634d32ac5706	C18.7	Sigmoid colon	Not Reported	not reported	Not Reported	82b071e6-02fc-564b-8e6d-bd8789a62b88	white
TCGA-AA-3846-01A-01R-1022-07	TCGA-AA-3846	TCGA-AA-3846-01A	TP	Primary solid Tumor	TCGA-AA-3846-01A	1	Primary	0881378b-2103-4d63-8173-430b34267eac	TCGA-AA-3846	Primary Tumor	NA	Solid Tissue	released	FALSE	Tumor	Unknown	Not Reported	NA	NA	0.8	5096c73e-2a6b-4302-b397-e6b2161c081c	0.2	1	No	Stage IIA	0	list(treatment_intent_type = c(NA, NA), updated_datetime = c("2019-07-31T18:40:16.258229-05:00", "2019-07-31T18:40:16.258229-05:00"), treatment_id = c("46d83e31-476e-5ab5-8955-413610d1de33", "c194707a-c268-5998-a049-b9c1d4f8bfdf"), submitter_id = c("TCGA-AA-3846_treatment", "TCGA-AA-3846_treatment_1"), treatment_type = c("Radiation Therapy, NOS", "Pharmaceutical Therapy, NOS"), state = c("release…	not reported	Sigmoid colon	518	27057	Adenocarcinoma, NOS	no	2009	No	6th	T3	1940-03-01	N0	M0	not reported	3ea5cd3a-d86e-581a-9441-bce00029e406	C18.7	Sigmoid colon	Not Reported	not reported	Not Reported	b9abcf71-b062-5373-aea2-ac1cad8308f7	not reported
TCGA-CM-6168-01A-11R-1653-07	TCGA-CM-6168	TCGA-CM-6168-01A	TP	Primary solid Tumor	TCGA-CM-6168-01A	1	Primary	ff1f5513-8463-4b1e-b254-72d9e0863d35	TCGA-CM-6168	Primary Tumor	NA	Solid Tissue	released	FALSE	Tumor	Unknown	Not Reported	NA	NA	0.8	699e7e12-232f-454c-8f1b-6278df9bcc52	0.6	1.9	No	Stage IIA	0	list(days_to_treatment_end = c(NA, NA), days_to_treatment_start = c(NA, NA), treatment_id = c("8d85d1ad-86b5-5d7b-832a-371ef0adafba", "fe9ccd63-4e63-52c3-b59c-dc5d1a351397"), submitter_id = c("TCGA-CM-6168_treatment_1", "TCGA-CM-6168_treatment"), treatment_type = c("Pharmaceutical Therapy, NOS", "Radiation Therapy, NOS"), regimen_or_line_of_therapy = c(NA, NA), treatment_effect = c(NA, NA), thera…	not reported	Ascending colon	395	30834	Adenocarcinoma, NOS	no	2010	No	7th	T3	1940-03-01	N0	M0	not reported	4d675235-6e2b-572c-8588-2aee9c15dde6	C18.2	Ascending colon	Not Reported	not reported	Not Reported	5edaed84-9a02-594b-a141-5aa48c58f696	black or african american
TCGA-AA-3667-01A-01R-0905-07	TCGA-AA-3667	TCGA-AA-3667-01A	TP	Primary solid Tumor	TCGA-AA-3667-01A	1	Primary	f793e6b4-c9b9-45b5-8ebb-d151dbc7508e	TCGA-AA-3667	Primary Tumor	NA	Solid Tissue	released	FALSE	Tumor	Unknown	Not Reported	NA	NA	0.6	5d3da8c3-0854-439d-b2f3-2f9016a78b9d	0.4	0.6	No	Stage I	0	list(treatment_intent_type = c(NA, NA), updated_datetime = c("2019-07-31T18:38:03.030838-05:00", "2019-07-31T18:38:03.030838-05:00"), treatment_id = c("7618f90b-e21e-559c-a294-826fa5d22b88", "bc443232-8611-5aee-8da0-a2365412797e"), submitter_id = c("TCGA-AA-3667_treatment", "TCGA-AA-3667_treatment_1"), treatment_type = c("Radiation Therapy, NOS", "Pharmaceutical Therapy, NOS"), state = c("release…	not reported	Colon, NOS	426	13302	Adenocarcinoma, NOS	no	2005	No	5th	T2	1940-03-01	N0	M0	not reported	8909b7bd-0c4f-5604-b360-2175bb1340fa	C18.9	Colon, NOS	Not Reported	not reported	Not Reported	d49e2111-4b9d-5d70-bfa4-bc93bd40d7fb	not reported
TCGA-AA-3664-01A-01R-0905-07	TCGA-AA-3664	TCGA-AA-3664-01A	TP	Primary solid Tumor	TCGA-AA-3664-01A	1	Primary	d448668c-90f3-40fa-9961-88407090da31	TCGA-AA-3664	Primary Tumor	NA	Solid Tissue	released	FALSE	Tumor	Unknown	Not Reported	NA	NA	1	c000f50b-58b6-4c7a-9859-43d199747cf0	0.6	1	No	Stage II	0	list(days_to_treatment_end = c(NA, NA), days_to_treatment_start = c(NA, NA), treatment_id = c("2a5a0266-2ebe-5bc8-8082-1871e2aa1775", "45948917-d0eb-50c0-8bb0-d40433c61e5f"), submitter_id = c("TCGA-AA-3664_treatment_1", "TCGA-AA-3664_treatment"), treatment_type = c("Pharmaceutical Therapy, NOS", "Radiation Therapy, NOS"), regimen_or_line_of_therapy = c(NA, NA), treatment_effect = c(NA, NA), thera…	not reported	Ascending colon	1643	27363	Adenocarcinoma, NOS	no	2005	No	5th	T3	1940-03-01	N0	M0	not reported	cd975e54-f000-5052-ad06-3230d7372424	C18.2	Cecum	Not Reported	not reported	Not Reported	0b74eb87-48fd-5282-836b-053f124997b6	not reported
TCGA-G4-6309-01A-21R-1839-07	TCGA-G4-6309	TCGA-G4-6309-01A	TP	Primary solid Tumor	TCGA-G4-6309-01A	1	Primary	019736e0-3672-4aa7-a00d-891bdd1f7f5c	TCGA-G4-6309	Primary Tumor	NA	Solid Tissue	released	FALSE	Tumor	Unknown	Not Reported	NA	NA	0.7	ae3c7a6c-7dec-49c3-bcc7-454a49c1201d	0.1	1.3	No	Stage IIIB	0	list(days_to_treatment_end = c(NA, NA), days_to_treatment_start = c(NA, NA), treatment_id = c("1eee738d-d554-5ee2-9c01-7d5584196238", "20f95993-c1b1-579d-ba8a-7ef07a3cb65c"), submitter_id = c("TCGA-G4-6309_treatment_1", "TCGA-G4-6309_treatment"), treatment_type = c("Pharmaceutical Therapy, NOS", "Radiation Therapy, NOS"), regimen_or_line_of_therapy = c(NA, NA), treatment_effect = c(NA, NA), thera…	not reported	Sigmoid colon	2600	14729	Adenocarcinoma, NOS	no	2007	No	6th	T3	1940-03-01	N1	M0	not reported	c58310a6-29d9-5420-b679-94adc4440ebc	C18.7	Sigmoid colon	Not Reported	not reported	Not Reported	528d114e-1bd8-59fb-b3d5-722a818eecb0	black or african american
TCGA-AA-A02J-01A-01R-A00A-07	TCGA-AA-A02J	TCGA-AA-A02J-01A	TP	Primary solid Tumor	TCGA-AA-A02J-01A	1	Primary	edec4f1e-7e35-48d3-950f-9e94cec48c45	TCGA-AA-A02J	Primary Tumor	FALSE	Solid Tissue	released	FALSE	Tumor	Unknown	Not Reported	581	270	NA	18C139E3-62C0-4D98-8D1B-BA412EE9BE1E	NA	NA	No	Stage IV	0	list(treatment_intent_type = c(NA, NA), updated_datetime = c("2019-07-31T18:30:36.936132-05:00", "2019-07-31T18:30:36.936132-05:00"), treatment_id = c("57306cc6-a818-5c8a-9a0b-beb2f16a2e24", "9acc339a-aaa3-5f62-bb33-2b9cc9c7c806"), submitter_id = c("TCGA-AA-A02J_treatment", "TCGA-AA-A02J_treatment_1"), treatment_type = c("Radiation Therapy, NOS", "Pharmaceutical Therapy, NOS"), state = c("release…	not reported	Sigmoid colon	NA	25749	Adenocarcinoma, NOS	no	2008	No	6th	T3	1940-03-01	N0	M1	not reported	cedc5cfa-8af7-5813-abc3-4eeb47440e2c	C18.7	Sigmoid colon	Not Reported	not reported	Not Reported	98f2e78a-f4d3-5267-b82b-88145af7770d	not reported
TCGA-A6-2675-11A-01R-1723-07	TCGA-A6-2675	TCGA-A6-2675-11A	NT	Solid Tissue Normal	TCGA-A6-2675-11A	11	Not Applicable	ea4647ed-9f05-47b1-bccd-1dec362903c4	TCGA-A6-2675	Solid Tissue Normal	NA	Solid Tissue	released	FALSE	Normal	Unknown	Not Reported	NA	NA	0.9	NA	0.9	1	No	Stage IIA	0	list(days_to_treatment_end = c(NA, NA), days_to_treatment_start = c(NA, NA), treatment_id = c("95c46bfc-0f9f-53d5-846b-3fae9a1609ba", "b3be54c6-564e-5d3c-aa0e-1ad601b5bbc5"), submitter_id = c("TCGA-A6-2675_treatment_1", "TCGA-A6-2675_treatment"), treatment_type = c("Pharmaceutical Therapy, NOS", "Radiation Therapy, NOS"), regimen_or_line_of_therapy = c(NA, NA), treatment_effect = c(NA, NA), thera…	not reported	Sigmoid colon	1321	28813	Adenocarcinoma, NOS	no	2009	No	6th	T3	1940-03-01	N0	MX	not reported	730825f4-a364-56a2-878c-a19ec8b3b2ee	C18.7	Sigmoid colon	Not Reported	not reported	Not Reported	9a2795d9-82d7-578b-85eb-19acc4b60656	white
TCGA-F4-6854-01A-11R-1928-07	TCGA-F4-6854	TCGA-F4-6854-01A	TP	Primary solid Tumor	TCGA-F4-6854-01A	1	Primary	7c12327f-05c5-4721-8031-93a318835580	TCGA-F4-6854	Primary Tumor	NA	Solid Tissue	released	FALSE	Tumor	Unknown	Not Reported	NA	NA	0.8	7b65634e-37d9-4edd-9b0a-e3eb627999b0	0.4	2.3	No	Stage IIA	0	list(days_to_treatment_end = c(NA, NA), days_to_treatment_start = c(NA, NA), treatment_id = c("3226f0a2-4850-5dc2-aeac-6e3eacfc04b3", "c2edb8f2-f179-553e-b7a5-a3b40248bf6d"), submitter_id = c("TCGA-F4-6854_treatment_1", "TCGA-F4-6854_treatment"), treatment_type = c("Pharmaceutical Therapy, NOS", "Radiation Therapy, NOS"), regimen_or_line_of_therapy = c(NA, NA), treatment_effect = c(NA, NA), thera…	not reported	Sigmoid colon	16	28272	Adenocarcinoma, NOS	no	2011	No	7th	T3	1940-03-01	N0	M0	not reported	7ab667a5-24f1-521f-af07-009572bea810	C18.7	Sigmoid colon	Not Reported	not reported	Not Reported	7b3a315f-2cc1-5aee-9ed4-7a951fe26905	white
TCGA-AZ-4308-01A-01R-1410-07	TCGA-AZ-4308	TCGA-AZ-4308-01A	TP	Primary solid Tumor	TCGA-AZ-4308-01A	1	Primary	6f0e65b2-7ca0-4f10-8952-b64900009001	TCGA-AZ-4308	Primary Tumor	NA	Solid Tissue	released	FALSE	Tumor	Unknown	Not Reported	NA	NA	1	ed3ab172-0cb7-4af2-827d-65a566bf7c66	0.5	1.5	No	Stage IIIB	0	list(days_to_treatment_end = c(NA, NA), days_to_treatment_start = c(NA, NA), treatment_id = c("49837d72-8d09-5d22-b616-36d8f2614eef", "92dea7bc-2211-5971-9774-3eb2f87d011c"), submitter_id = c("TCGA-AZ-4308_treatment_1", "TCGA-AZ-4308_treatment"), treatment_type = c("Pharmaceutical Therapy, NOS", "Radiation Therapy, NOS"), regimen_or_line_of_therapy = c(NA, NA), treatment_effect = c(NA, NA), thera…	not reported	Sigmoid colon	3324	17321	Adenocarcinoma, NOS	no	2006	No	6th	T3	1940-03-01	N1	M0	not reported	a55b6a19-0122-55ce-9350-986201bbc965	C18.7	Sigmoid colon	Not Reported	not reported	Not Reported	e5e41f79-5354-5b0e-abce-d5302a455af6	white
TCGA-AA-A00A-01A-01R-A002-07	TCGA-AA-A00A	TCGA-AA-A00A-01A	TP	Primary solid Tumor	TCGA-AA-A00A-01A	1	Primary	8b3894ca-3aa9-415b-b6ad-948f81428b89	TCGA-AA-A00A	Primary Tumor	FALSE	Solid Tissue	released	FALSE	Tumor	Unknown	Not Reported	326	300	NA	8159A57E-D8E0-406E-9DAC-3E26E8EB1BA9	NA	NA	No	Stage IIA	0	list(days_to_treatment_end = c(NA, NA), days_to_treatment_start = c(NA, NA), treatment_id = c("2fbf44fb-063a-5228-9137-03e896afafaa", "6c1be5c5-9358-5dd6-a78e-605efb4e55b3"), submitter_id = c("TCGA-AA-A00A_treatment_1", "TCGA-AA-A00A_treatment"), treatment_type = c("Pharmaceutical Therapy, NOS", "Radiation Therapy, NOS"), regimen_or_line_of_therapy = c(NA, NA), treatment_effect = c(NA, NA), thera…	not reported	Ascending colon	1157	29463	Adenocarcinoma, NOS	no	2009	No	6th	T3	1940-03-01	N0	M0	not reported	203f17be-cef5-52b9-960a-3bf88691d47c	C18.2	Ascending colon	Not Reported	not reported	Not Reported	54cdf5dc-6d91-5db3-b106-e9eac6ef8722	not reported
TCGA-NH-A6GC-01A-12R-A41B-07	TCGA-NH-A6GC	TCGA-NH-A6GC-01A	TP	Primary solid Tumor	TCGA-NH-A6GC-01A	1	Primary	6483a131-0ac0-4d9d-b184-b249e1ac971f	TCGA-NH-A6GC	Primary Tumor	FALSE	Solid Tissue	released	FALSE	Tumor	Unknown	Not Reported	14	1160	NA	B4D412AD-FD5C-4397-B56E-62F39A375751	NA	NA	No	Stage IVB	0	list(days_to_treatment_end = c(NA, NA), days_to_treatment_start = c(NA, NA), treatment_id = c("1dd37f47-5317-52da-84ed-843ee61c6d97", "abc88233-23f7-5576-9649-2a3387ffe4e8"), submitter_id = c("TCGA-NH-A6GC_treatment_1", "TCGA-NH-A6GC_treatment"), treatment_type = c("Pharmaceutical Therapy, NOS", "Radiation Therapy, NOS"), regimen_or_line_of_therapy = c(NA, NA), treatment_effect = c(NA, NA), thera…	not reported	Descending colon	389	24355	Mucinous adenocarcinoma	no	2013	No	7th	T4b	1980-03-01	N1b	M1b	not reported	cb1f5a7d-49ae-5f9c-a9ce-b4610a9723ba	C18.6	Descending colon	Not Reported	not reported	Not Reported	444f34e1-368f-5f6d-a7f6-4d363f232190	black or african american
TCGA-AD-5900-01A-11R-1653-07	TCGA-AD-5900	TCGA-AD-5900-01A	TP	Primary solid Tumor	TCGA-AD-5900-01A	1	Primary	8824fcd3-242a-47a9-933e-632d5531bd6c	TCGA-AD-5900	Primary Tumor	NA	Solid Tissue	released	FALSE	Tumor	Unknown	Not Reported	NA	NA	0.4	dfe40b96-eb9b-4544-a87d-9abc80f8a357	0.3	0.6	No	Stage I	0	list(days_to_treatment_end = c(NA, NA), days_to_treatment_start = c(NA, NA), treatment_id = c("3a44faf4-1178-56a9-ba96-703ef4796664", "7e5cd073-f004-526d-85d5-75156172f229"), submitter_id = c("TCGA-AD-5900_treatment_1", "TCGA-AD-5900_treatment"), treatment_type = c("Pharmaceutical Therapy, NOS", "Radiation Therapy, NOS"), regimen_or_line_of_therapy = c(NA, NA), treatment_effect = c(NA, NA), thera…	not reported	Ascending colon	370	24776	Mucinous adenocarcinoma	no	2010	No	7th	T2	1980-03-01	N0	MX	not reported	c69ecd47-0e8c-56be-a97a-082d041ab034	C18.2	Ascending colon	Not Reported	not reported	Not Reported	06731632-e579-5088-8f6a-404bba30b89c	white
TCGA-A6-2679-11A-01R-A32Z-07	TCGA-A6-2679	TCGA-A6-2679-11A	NT	Solid Tissue Normal	TCGA-A6-2679-11A	11	Not Applicable	eb51613d-7d22-4c07-9a79-692927ed92e0	TCGA-A6-2679	Solid Tissue Normal	NA	Solid Tissue	released	FALSE	Normal	Unknown	Not Reported	NA	NA	0.8	NA	0.4	1.3	No	Stage IIB	0	list(treatment_intent_type = c(NA, NA), updated_datetime = c("2019-07-31T18:23:32.264546-05:00", "2019-07-31T18:23:32.264546-05:00"), treatment_id = c("12e9ea4e-defd-5518-a6f1-25795e3374a6", "ce0e6b06-afbc-5865-91cc-1e60c2ba243f"), submitter_id = c("TCGA-A6-2679_treatment", "TCGA-A6-2679_treatment_1"), treatment_type = c("Radiation Therapy, NOS", "Pharmaceutical Therapy, NOS"), state = c("release…	not reported	Ascending colon	1366	26820	Adenocarcinoma, NOS	no	2009	No	6th	T3	1940-03-01	N0	NA	not reported	9fb756f6-d611-5c22-bebc-e14dc407b293	C18.2	Ascending colon	Not Reported	not reported	Not Reported	cf1ffd5a-e432-5fb3-94c8-9bc5e85bbb54	white
TCGA-A6-2679-01A-02R-1410-07	TCGA-A6-2679	TCGA-A6-2679-01A	TP	Primary solid Tumor	TCGA-A6-2679-01A	1	Primary	1fcb9c83-18cb-42a4-8769-fddb3541c95d	TCGA-A6-2679	Primary Tumor	NA	Solid Tissue	released	FALSE	Tumor	Unknown	Not Reported	NA	NA	0.6	9a1a3daf-5e4d-4f24-8e73-2352bdefef40	0.4	1.2	No	Stage IIB	0	list(treatment_intent_type = c(NA, NA), updated_datetime = c("2019-07-31T18:23:32.264546-05:00", "2019-07-31T18:23:32.264546-05:00"), treatment_id = c("12e9ea4e-defd-5518-a6f1-25795e3374a6", "ce0e6b06-afbc-5865-91cc-1e60c2ba243f"), submitter_id = c("TCGA-A6-2679_treatment", "TCGA-A6-2679_treatment_1"), treatment_type = c("Radiation Therapy, NOS", "Pharmaceutical Therapy, NOS"), state = c("release…	not reported	Ascending colon	1366	26820	Adenocarcinoma, NOS	no	2009	No	6th	T3	1940-03-01	N0	NA	not reported	9fb756f6-d611-5c22-bebc-e14dc407b293	C18.2	Ascending colon	Not Reported	not reported	Not Reported	cf1ffd5a-e432-5fb3-94c8-9bc5e85bbb54	white
TCGA-AA-3495-01A-01R-1410-07	TCGA-AA-3495	TCGA-AA-3495-01A	TP	Primary solid Tumor	TCGA-AA-3495-01A	1	Primary	57733d46-9726-4cc0-825f-77185bc7bea9	TCGA-AA-3495	Primary Tumor	NA	Solid Tissue	released	FALSE	Tumor	Unknown	Not Reported	NA	NA	0.5	5cecfe00-91c2-4b8c-98c6-5b6b1f997390	0.3	0.5	No	Stage I	0	list(treatment_intent_type = c(NA, NA), updated_datetime = c("2019-07-31T18:24:13.173721-05:00", "2019-07-31T18:24:13.173721-05:00"), treatment_id = c("35c62a5e-3512-5ea9-b361-e2a454c4b7ee", "a51ce2a9-27cc-596d-9c66-08914f346439"), submitter_id = c("TCGA-AA-3495_treatment", "TCGA-AA-3495_treatment_1"), treatment_type = c("Radiation Therapy, NOS", "Pharmaceutical Therapy, NOS"), state = c("release…	not reported	Hepatic flexure of colon	1127	28886	Adenocarcinoma, NOS	no	2002	No	5th	T2	1940-03-01	N0	M0	not reported	4e7b68ee-a376-5503-a627-178a80426601	C18.2	Hepatic flexure of colon	Not Reported	not reported	Not Reported	5ee8c85a-16b2-59d4-afa1-a12afb049859	not reported
TCGA-AA-A02E-01A-01R-A00A-07	TCGA-AA-A02E	TCGA-AA-A02E-01A	TP	Primary solid Tumor	TCGA-AA-A02E-01A	1	Primary	a5945f6b-31da-4742-811e-e85f2e2e8ffc	TCGA-AA-A02E	Primary Tumor	FALSE	Solid Tissue	released	FALSE	Tumor	Unknown	Not Reported	1128	390	NA	72783514-8591-469B-B5CE-B63E274A521C	NA	NA	No	Stage IV	0	list(treatment_intent_type = c(NA, NA), updated_datetime = c("2019-07-31T15:23:31.286814-05:00", "2019-07-31T15:23:31.286814-05:00"), treatment_id = c("0771db3a-6477-5672-bfa6-87f2238ee087", "7a2aa98a-dc4f-54f7-9411-a44bf0be2132"), submitter_id = c("TCGA-AA-A02E_treatment", "TCGA-AA-A02E_treatment_1"), treatment_type = c("Radiation Therapy, NOS", "Pharmaceutical Therapy, NOS"), state = c("release…	not reported	Cecum	NA	30256	Adenocarcinoma, NOS	no	2007	No	6th	T3	1940-03-01	N1	M1	not reported	b24593bb-d02e-56be-8b72-c3da726a1d0b	C18.0	Cecum	Not Reported	not reported	Not Reported	d440559e-97ab-5786-802b-2f2269b8142a	not reported
TCGA-AY-6386-01A-21R-1723-07	TCGA-AY-6386	TCGA-AY-6386-01A	TP	Primary solid Tumor	TCGA-AY-6386-01A	1	Primary	87ffeaea-93d7-4c88-85b9-b1b29b7f8e1d	TCGA-AY-6386	Primary Tumor	NA	Solid Tissue	released	FALSE	Tumor	Unknown	Not Reported	NA	NA	0.6	42afbc8e-3c33-4e57-b9ff-68bcaa3efa94	0.3	0.9	No	Stage IIIB	0	list(days_to_treatment_end = c(NA, NA), days_to_treatment_start = c(NA, NA), treatment_id = c("5f937753-b094-534d-b8b3-d29be5f3fbd3", "7c0aeafa-7fec-5855-b1e7-e021e3f46a0d"), submitter_id = c("TCGA-AY-6386_treatment_1", "TCGA-AY-6386_treatment"), treatment_type = c("Pharmaceutical Therapy, NOS", "Radiation Therapy, NOS"), regimen_or_line_of_therapy = c(NA, NA), treatment_effect = c(NA, NA), thera…	not reported	Cecum	542	24453	Adenocarcinoma, NOS	no	2010	No	7th	T3	1940-03-01	N1a	M0	not reported	62769a9a-72fb-5a7d-9e57-814ffdb0e32c	C18.0	Cecum	Not Reported	not reported	Not Reported	954c081c-e237-5cbf-bd1c-d169866979d2	black or african american
TCGA-AD-6963-01A-11R-1928-07	TCGA-AD-6963	TCGA-AD-6963-01A	TP	Primary solid Tumor	TCGA-AD-6963-01A	1	Primary	08003f93-05c8-40ed-95dc-16abf83b1e43	TCGA-AD-6963	Primary Tumor	NA	Solid Tissue	released	FALSE	Tumor	Unknown	Not Reported	NA	NA	0.3	cc2d253a-3e7a-4701-a5f3-12b70e3fa203	0.2	0.3	No	NA	0	list(treatment_intent_type = c(NA, NA), updated_datetime = c("2019-07-31T18:27:46.936278-05:00", "2019-07-31T18:27:46.936278-05:00"), treatment_id = c("1bd49920-cccc-53f3-843e-3ff7465d6571", "7838ae38-8303-50d3-bfca-4c005523778a"), submitter_id = c("TCGA-AD-6963_treatment", "TCGA-AD-6963_treatment_1"), treatment_type = c("Radiation Therapy, NOS", "Pharmaceutical Therapy, NOS"), state = c("release…	not reported	Ascending colon	834	21294	Adenocarcinoma, NOS	no	2011	No	7th	T3	1940-03-01	N0	MX	not reported	a73cc9d4-8bbf-5acb-a5a1-298ddf744b3c	C18.2	Ascending colon	Not Reported	not reported	Not Reported	7956bffd-3156-5dc9-af7c-eda50aa8ac87	white
TCGA-AA-A01Q-01A-01R-A002-07	TCGA-AA-A01Q	TCGA-AA-A01Q-01A	TP	Primary solid Tumor	TCGA-AA-A01Q-01A	1	Primary	5d1d7c40-f636-46c6-9540-4df11a466b15	TCGA-AA-A01Q	Primary Tumor	FALSE	Solid Tissue	released	FALSE	Tumor	Unknown	Not Reported	2243	440	NA	C5E7082D-B5A0-4BF7-B929-9F6715A02276	NA	NA	No	Stage II	0	list(treatment_intent_type = c(NA, NA), updated_datetime = c("2019-07-31T18:28:02.355155-05:00", "2019-07-31T18:28:02.355155-05:00"), treatment_id = c("4547dfd3-c008-5e9b-a8c9-77aceb60e85a", "90cde6ca-7dd9-5cb7-a471-a4e6c43f9bd4"), submitter_id = c("TCGA-AA-A01Q_treatment", "TCGA-AA-A01Q_treatment_1"), treatment_type = c("Radiation Therapy, NOS", "Pharmaceutical Therapy, NOS"), state = c("release…	not reported	Ascending colon	31	17715	Adenocarcinoma, NOS	no	2003	No	5th	T3	1940-03-01	N0	M0	not reported	c9cf5037-2b85-51a3-8eae-ce4aa1747dcd	C18.2	Ascending colon	Not Reported	not reported	Not Reported	8b8371ac-76b7-5ef8-bb05-b592d61f27b6	not reported
TCGA-NH-A6GA-01A-11R-A37K-07	TCGA-NH-A6GA	TCGA-NH-A6GA-01A	TP	Primary solid Tumor	TCGA-NH-A6GA-01A	1	Primary	cac671b1-b9d0-484b-9add-fd935d4efc93	TCGA-NH-A6GA	Primary Tumor	FALSE	Solid Tissue	released	FALSE	Tumor	Unknown	Not Reported	78	560	NA	53BA96AA-B755-460C-83CF-ED5BCCD031F6	NA	NA	No	Stage IIIC	0	list(days_to_treatment_end = c(NA, NA), days_to_treatment_start = c(NA, NA), treatment_id = c("34d81ea8-9f6d-52e4-8f1f-d470a149ca11", "f6879a65-0b05-5457-8c16-795d794228c6"), submitter_id = c("TCGA-NH-A6GA_treatment_1", "TCGA-NH-A6GA_treatment"), treatment_type = c("Pharmaceutical Therapy, NOS", "Radiation Therapy, NOS"), regimen_or_line_of_therapy = c(NA, NA), treatment_effect = c(NA, NA), thera…	not reported	Ascending colon	182	21313	Adenocarcinoma, NOS	no	2013	No	7th	T4a	1940-03-01	N2a	MX	not reported	6a2b02be-3467-5b81-aabc-41644bb49652	C18.2	Ascending colon	Not Reported	not reported	Not Reported	22158a40-9188-54b2-92e1-1a79d904ced0	black or african american
TCGA-AA-A00F-01A-01R-A002-07	TCGA-AA-A00F	TCGA-AA-A00F-01A	TP	Primary solid Tumor	TCGA-AA-A00F-01A	1	Primary	4c8c93dd-b680-4b2e-8801-f667b7ab515b	TCGA-AA-A00F	Primary Tumor	FALSE	Solid Tissue	released	FALSE	Tumor	Unknown	Not Reported	812	120	NA	55E026EA-CC8D-4295-896D-0FFDACE323B0	NA	NA	No	Stage IIIC	0	list(days_to_treatment_end = c(NA, NA), days_to_treatment_start = c(NA, NA), treatment_id = c("7772deae-fb9c-5221-8d47-4cd564a94179", "bf8676e4-8420-596e-abbf-414bd07b1460"), submitter_id = c("TCGA-AA-A00F_treatment_1", "TCGA-AA-A00F_treatment"), treatment_type = c("Pharmaceutical Therapy, NOS", "Radiation Therapy, NOS"), regimen_or_line_of_therapy = c(NA, NA), treatment_effect = c(NA, NA), thera…	not reported	Sigmoid colon	1035	24379	Adenocarcinoma, NOS	no	2007	No	6th	T3	1940-03-01	N2	M0	not reported	cf087410-19be-5f49-9fd4-9a6e93f8bc49	C18.7	Sigmoid colon	Not Reported	not reported	Not Reported	8df84a74-cdc3-5c76-b1be-9fb2ca3f2b16	not reported
TCGA-A6-2671-11A-01R-A32Z-07	TCGA-A6-2671	TCGA-A6-2671-11A	NT	Solid Tissue Normal	TCGA-A6-2671-11A	11	Not Applicable	a4b58604-884f-4f42-aaf4-056274017721	TCGA-A6-2671	Solid Tissue Normal	NA	Solid Tissue	released	FALSE	Normal	Unknown	Not Reported	NA	NA	0.7	NA	0.5	1.8	No	Stage IV	0	list(days_to_treatment_end = c(NA, NA), days_to_treatment_start = c(NA, NA), treatment_id = c("7b46b686-89e3-568d-a285-6a5e9608c516", "ba7bc9b5-32ac-56b5-ba45-3d4695bc2367"), submitter_id = c("TCGA-A6-2671_treatment_1", "TCGA-A6-2671_treatment"), treatment_type = c("Pharmaceutical Therapy, NOS", "Radiation Therapy, NOS"), regimen_or_line_of_therapy = c(NA, NA), treatment_effect = c(NA, NA), thera…	not reported	Sigmoid colon	1126	31329	Adenocarcinoma, NOS	no	2009	No	6th	T3	1940-03-01	N2	M1	not reported	791edec8-056b-5ce1-9b25-15c861f9c69c	C18.7	Sigmoid colon	Not Reported	not reported	Not Reported	46362139-6b1a-541c-b8d0-57e4eb419ca5	white
TCGA-A6-2671-01A-01R-1410-07	TCGA-A6-2671	TCGA-A6-2671-01A	TP	Primary solid Tumor	TCGA-A6-2671-01A	1	Primary	81505915-6c01-4299-ae89-964dc20d93cb	TCGA-A6-2671	Primary Tumor	NA	Solid Tissue	released	FALSE	Tumor	Unknown	Not Reported	NA	NA	0.6	d96c8372-9f4b-4e94-b93d-faea6a1445b1	0.6	1.8	No	Stage IV	0	list(days_to_treatment_end = c(NA, NA), days_to_treatment_start = c(NA, NA), treatment_id = c("7b46b686-89e3-568d-a285-6a5e9608c516", "ba7bc9b5-32ac-56b5-ba45-3d4695bc2367"), submitter_id = c("TCGA-A6-2671_treatment_1", "TCGA-A6-2671_treatment"), treatment_type = c("Pharmaceutical Therapy, NOS", "Radiation Therapy, NOS"), regimen_or_line_of_therapy = c(NA, NA), treatment_effect = c(NA, NA), thera…	not reported	Sigmoid colon	1126	31329	Adenocarcinoma, NOS	no	2009	No	6th	T3	1940-03-01	N2	M1	not reported	791edec8-056b-5ce1-9b25-15c861f9c69c	C18.7	Sigmoid colon	Not Reported	not reported	Not Reported	46362139-6b1a-541c-b8d0-57e4eb419ca5	white
TCGA-AA-3520-01A-01R-0821-07	TCGA-AA-3520	TCGA-AA-3520-01A	TP	Primary solid Tumor	TCGA-AA-3520-01A	1	Primary	e00ba2f0-aa08-4fe7-8868-59affd52eec5	TCGA-AA-3520	Primary Tumor	NA	Solid Tissue	released	FALSE	Tumor	Unknown	Not Reported	NA	NA	0.6	1ccf52ac-3817-46af-9dc6-a948f919a527	0.4	0.9	Not Reported	Stage II	0	list(treatment_intent_type = c(NA, NA), updated_datetime = c("2019-07-31T18:29:24.964523-05:00", "2019-07-31T18:29:24.964523-05:00"), treatment_id = c("182246ac-4214-5006-8637-8abf210611c6", "260d65d8-d70d-5627-8619-a78c91dc63bd"), submitter_id = c("TCGA-AA-3520_treatment", "TCGA-AA-3520_treatment_1"), treatment_type = c("Radiation Therapy, NOS", "Pharmaceutical Therapy, NOS"), state = c("release…	not reported	Ascending colon	731	31531	Adenocarcinoma, NOS	yes	2007	No	5th	T3	1940-03-01	N0	M0	not reported	d8bf73cd-1bd9-5bb9-bb4f-9e6806d5b61a	C18.2	Ascending colon	Not Reported	not reported	Not Reported	da6a3b91-6823-5f93-a81a-c706bbafe9d5	not reported
TCGA-RU-A8FL-01A-11R-A37K-07	TCGA-RU-A8FL	TCGA-RU-A8FL-01A	TP	Primary solid Tumor	TCGA-RU-A8FL-01A	1	Primary	33754280-57c0-45b7-8f33-984ceb7ddffb	TCGA-RU-A8FL	Primary Tumor	TRUE	Solid Tissue	released	FALSE	Tumor	OCT	Not Reported	861	130	NA	92DF9BB6-DB3F-40A7-AE1E-8272C46B1968	NA	NA	No	Stage IIIB	0	list(days_to_treatment_end = c(NA, NA), days_to_treatment_start = c(NA, NA), treatment_id = c("7666f5fa-d10f-5803-89d9-49e5a3e9f1e8", "e360d000-a09b-55af-997a-4139855cf582"), submitter_id = c("TCGA-RU-A8FL_treatment_1", "TCGA-RU-A8FL_treatment"), treatment_type = c("Pharmaceutical Therapy, NOS", "Radiation Therapy, NOS"), regimen_or_line_of_therapy = c(NA, NA), treatment_effect = c(NA, NA), thera…	not reported	Cecum	1177	18975	Adenocarcinoma, NOS	no	2011	No	7th	T3	1940-03-01	N2a	MX	not reported	15be329f-b060-50bd-8af3-dcdd8805286c	C18.0	Cecum	Not Reported	not reported	Not Reported	c3f20ac9-d1b2-58d3-b839-52edcefd7a02	black or african american
TCGA-A6-6650-01B-02R-A277-07	TCGA-A6-6650	TCGA-A6-6650-01B	TP	Primary solid Tumor	TCGA-A6-6650-01B	1	Primary	d95e1d88-5b39-4a57-a445-abfeb765eaf7	TCGA-A6-6650	Primary Tumor	FALSE	Solid Tissue	released	TRUE	Tumor	FFPE	Not Reported	341	NA	NA	a3bacc5b-1c12-44e2-99f6-80baa8668283	NA	NA	No	Stage IIA	0	list(treatment_intent_type = c(NA, NA), updated_datetime = c("2019-07-31T15:21:13.921799-05:00", "2019-07-31T15:21:13.921799-05:00"), treatment_id = c("590200f9-4fc4-57a6-af2f-64d321a9e1c5", "e8044245-1521-5b8b-8a39-6ef9e12ee1b8"), submitter_id = c("TCGA-A6-6650_treatment", "TCGA-A6-6650_treatment_1"), treatment_type = c("Radiation Therapy, NOS", "Pharmaceutical Therapy, NOS"), state = c("release…	not reported	Ascending colon	627	25516	Adenocarcinoma, NOS	no	2010	No	7th	T3	1940-03-01	N0	M0	not reported	4a27df98-2f99-51e4-a0d8-f324ed8ea8bc	C18.2	Ascending colon	Not Reported	not reported	Not Reported	2c815065-4a2b-5c7a-9872-06f8c85259fd	black or african american
TCGA-AA-A017-01A-01R-A00A-07	TCGA-AA-A017	TCGA-AA-A017-01A	TP	Primary solid Tumor	TCGA-AA-A017-01A	1	Primary	a7aa065f-78f9-460a-a010-bd063ec5c851	TCGA-AA-A017	Primary Tumor	FALSE	Solid Tissue	released	FALSE	Tumor	Unknown	Not Reported	265	250	NA	6DFB118D-B692-4957-B563-B3A91080038F	NA	NA	No	Stage IIA	0	list(treatment_intent_type = c(NA, NA), updated_datetime = c("2019-07-31T18:34:45.765961-05:00", "2019-07-31T18:34:45.765961-05:00"), treatment_id = c("ac029135-8b68-5042-b912-df700297cffe", "d283af14-0eb8-5f84-afd2-59ed6fa6d884"), submitter_id = c("TCGA-AA-A017_treatment", "TCGA-AA-A017_treatment_1"), treatment_type = c("Radiation Therapy, NOS", "Pharmaceutical Therapy, NOS"), state = c("release…	not reported	Sigmoid colon	457	21032	Adenocarcinoma, NOS	no	2009	No	6th	T3	1940-03-01	N0	M0	not reported	1518d884-6bf0-53f8-8775-41f5cb143f84	C18.7	Sigmoid colon	Not Reported	not reported	Not Reported	59363211-3a0c-59b4-8025-b11d7e24a378	not reported
TCGA-G4-6322-01A-11R-1723-07	TCGA-G4-6322	TCGA-G4-6322-01A	TP	Primary solid Tumor	TCGA-G4-6322-01A	1	Primary	bb39734c-9d9c-4249-9d1b-176b28aba41c	TCGA-G4-6322	Primary Tumor	NA	Solid Tissue	released	FALSE	Tumor	Unknown	Not Reported	NA	NA	1	3e8f1c36-63d9-4f6e-8c16-b2e74f8fd138	0.3	1.2	No	Stage IIIB	0	list(treatment_intent_type = c(NA, NA), updated_datetime = c("2019-07-31T18:35:05.399240-05:00", "2019-07-31T18:35:05.399240-05:00"), treatment_id = c("ae117449-96a3-50bc-ae71-34e765bc47ce", "bf77108c-1cf2-58d6-8d2d-8f9774a09719"), submitter_id = c("TCGA-G4-6322_treatment", "TCGA-G4-6322_treatment_1"), treatment_type = c("Radiation Therapy, NOS", "Pharmaceutical Therapy, NOS"), state = c("release…	not reported	Descending colon	792	23825	Mucinous adenocarcinoma	no	2009	No	6th	T3	1980-03-01	N1	MX	not reported	134bc369-19e4-5690-87c7-19bd79a87594	C18.6	Descending colon	Not Reported	not reported	Not Reported	0d90e780-98a5-5136-8e5a-fc0ab4daa5f0	white
TCGA-D5-6924-01A-11R-1928-07	TCGA-D5-6924	TCGA-D5-6924-01A	TP	Primary solid Tumor	TCGA-D5-6924-01A	1	Primary	7da8a1f1-5a85-4bdf-a9c4-6fe98bce5923	TCGA-D5-6924	Primary Tumor	NA	Solid Tissue	released	FALSE	Tumor	Unknown	Not Reported	NA	NA	1	6a75e6b8-5ece-4fb9-9bca-5a751eac8d7c	0.7	1.1	No	Stage IIA	0	list(treatment_intent_type = c(NA, NA), updated_datetime = c("2019-07-31T18:35:47.126331-05:00", "2019-07-31T18:35:47.126331-05:00"), treatment_id = c("68f2bb47-5dde-5ca7-8da7-9d2f0a7c5fc3", "854f1ae1-73d0-5375-926d-24836391e701"), submitter_id = c("TCGA-D5-6924_treatment", "TCGA-D5-6924_treatment_1"), treatment_type = c("Radiation Therapy, NOS", "Pharmaceutical Therapy, NOS"), state = c("release…	not reported	Sigmoid colon	435	24964	Adenocarcinoma, NOS	no	2011	No	7th	T3	1940-03-01	N0	M0	not reported	a93300be-6f11-5e17-96e9-d09fbd1e5bbf	C18.7	Sigmoid colon	Not Reported	not reported	Not Reported	ad95a326-6351-5ed6-a99c-4c6d5049e27c	white
TCGA-CM-4746-01A-01R-1410-07	TCGA-CM-4746	TCGA-CM-4746-01A	TP	Primary solid Tumor	TCGA-CM-4746-01A	1	Primary	85991716-6807-4f31-be63-bf80cec40cc2	TCGA-CM-4746	Primary Tumor	NA	Solid Tissue	released	FALSE	Tumor	Unknown	Not Reported	NA	NA	1	bc55f7bb-df41-4dd7-b11d-03405027396a	0.3	1.6	No	Stage I	0	list(treatment_intent_type = c(NA, NA), updated_datetime = c("2019-07-31T18:36:01.855387-05:00", "2019-07-31T18:36:01.855387-05:00"), treatment_id = c("261c5cc0-4a33-5ec4-9113-3b6213bcef3b", "d249a047-44e1-5ce5-a6fd-a70b26a45e88"), submitter_id = c("TCGA-CM-4746_treatment", "TCGA-CM-4746_treatment_1"), treatment_type = c("Radiation Therapy, NOS", "Pharmaceutical Therapy, NOS"), state = c("release…	not reported	Sigmoid colon	1126	22403	Adenocarcinoma, NOS	no	2009	No	NA	T2	1940-03-01	N0	M0	not reported	65e9bac1-1b43-5c30-b825-3ac0d6b5f5b9	C18.7	Sigmoid colon	Not Reported	not reported	Not Reported	8f45694e-5688-5b42-a77d-05f6f5ac556a	black or african american
TCGA-CM-4743-01A-01R-1723-07	TCGA-CM-4743	TCGA-CM-4743-01A	TP	Primary solid Tumor	TCGA-CM-4743-01A	1	Primary	14eb006d-42b2-4765-9dc2-b96f9aa03c10	TCGA-CM-4743	Primary Tumor	NA	Solid Tissue	released	FALSE	Tumor	Unknown	Not Reported	NA	NA	NA	b3a7f5c8-89c3-4ab3-86d4-3577f1b58704	NA	NA	No	Stage IIA	0	list(days_to_treatment_end = c(NA, NA), days_to_treatment_start = c(NA, NA), treatment_id = c("3cd0a287-12a7-51de-91a7-e74d15a235eb", "8b5a6045-98cf-5eb6-bfac-7ae5a342a997"), submitter_id = c("TCGA-CM-4743_treatment_1", "TCGA-CM-4743_treatment"), treatment_type = c("Pharmaceutical Therapy, NOS", "Radiation Therapy, NOS"), regimen_or_line_of_therapy = c(NA, NA), treatment_effect = c(NA, NA), thera…	not reported	Ascending colon	701	25291	Adenocarcinoma, NOS	no	2010	No	NA	T3	1940-03-01	N0	M0	not reported	1eb8d123-4bf7-5b98-b1d3-f3ae783dd970	C18.2	Ascending colon	Not Reported	not reported	Not Reported	8d9c587e-3dd1-5cbe-9d81-9ba50e315f06	white
TCGA-AA-3518-11A-01R-1672-07	TCGA-AA-3518	TCGA-AA-3518-11A	NT	Solid Tissue Normal	TCGA-AA-3518-11A	11	Not Applicable	2aab9612-a6f8-47ce-a2f9-8724e9a922e4	TCGA-AA-3518	Solid Tissue Normal	NA	Solid Tissue	released	FALSE	Normal	Unknown	Not Reported	NA	NA	0.6	NA	0.3	1	No	Stage IIA	0	list(treatment_intent_type = c(NA, NA), updated_datetime = c("2019-07-31T18:36:28.849236-05:00", "2019-07-31T18:36:28.849236-05:00"), treatment_id = c("88e4ad58-0d68-5d69-a1da-8f8f91d1b71c", "acffe9cb-84ce-5ecc-af1d-5f1f85f3ab91"), submitter_id = c("TCGA-AA-3518_treatment", "TCGA-AA-3518_treatment_1"), treatment_type = c("Radiation Therapy, NOS", "Pharmaceutical Therapy, NOS"), state = c("release…	not reported	Cecum	31	29769	Adenocarcinoma, NOS	no	2007	No	6th	T3	1940-03-01	N0	M0	not reported	5016de54-86e5-5fce-bd1a-791e378036ce	C18.0	Cecum	Not Reported	not reported	Not Reported	07d7f0eb-a8b2-5fe0-b0e5-23767413743a	not reported
TCGA-AA-A00R-01A-01R-A002-07	TCGA-AA-A00R	TCGA-AA-A00R-01A	TP	Primary solid Tumor	TCGA-AA-A00R-01A	1	Primary	f72eeae9-f7f5-4576-a072-5021119117d6	TCGA-AA-A00R	Primary Tumor	FALSE	Solid Tissue	released	FALSE	Tumor	Unknown	Not Reported	599	270	NA	A4E3D45C-6471-4FBA-BC47-AF0FDC01E417	NA	NA	No	Stage I	0	list(days_to_treatment_end = c(NA, NA), days_to_treatment_start = c(NA, NA), treatment_id = c("14ef31b0-d5bb-57c7-a428-019c6a743a76", "b75f7997-d7cd-5bbb-832c-0b30ea9d6f06"), submitter_id = c("TCGA-AA-A00R_treatment_1", "TCGA-AA-A00R_treatment"), treatment_type = c("Pharmaceutical Therapy, NOS", "Radiation Therapy, NOS"), regimen_or_line_of_therapy = c(NA, NA), treatment_effect = c(NA, NA), thera…	not reported	Cecum	30	23528	Adenocarcinoma, NOS	no	2008	No	6th	T2	1940-03-01	N0	M0	not reported	216f1d6a-6cb6-56cf-a370-e889b9fa096b	C18.0	Cecum	Not Reported	not reported	Not Reported	508a5d20-8eca-5f50-9bf8-b19550b2336b	not reported
TCGA-AA-3678-01A-01R-0905-07	TCGA-AA-3678	TCGA-AA-3678-01A	TP	Primary solid Tumor	TCGA-AA-3678-01A	1	Primary	14c176f9-9197-4486-9f98-fe82991c6dc6	TCGA-AA-3678	Primary Tumor	NA	Solid Tissue	released	FALSE	Tumor	Unknown	Not Reported	NA	NA	0.9	c37db00c-1ae4-44fb-94c0-6348aec56948	0.3	0.9	No	Stage III	0	list(days_to_treatment_end = c(NA, NA), days_to_treatment_start = c(NA, NA), treatment_id = c("74916ee0-9851-5916-946c-4ee26f334dec", "9de5934f-0568-5186-a1cd-413c638d3e29"), submitter_id = c("TCGA-AA-3678_treatment_1", "TCGA-AA-3678_treatment"), treatment_type = c("Pharmaceutical Therapy, NOS", "Radiation Therapy, NOS"), regimen_or_line_of_therapy = c(NA, NA), treatment_effect = c(NA, NA), thera…	not reported	Sigmoid colon	1430	22219	Adenocarcinoma, NOS	no	2006	No	5th	T2	1940-03-01	N1	M0	not reported	9e2afa49-fb82-58b9-9570-ddc5d4110507	C18.7	Sigmoid colon	Not Reported	not reported	Not Reported	c3b72785-4ef1-5449-adb1-dc3db0f46f9e	not reported
TCGA-CM-4744-01A-01R-A32Z-07	TCGA-CM-4744	TCGA-CM-4744-01A	TP	Primary solid Tumor	TCGA-CM-4744-01A	1	Primary	a545fb9a-c386-4a80-9a25-660dc4f62904	TCGA-CM-4744	Primary Tumor	NA	Solid Tissue	released	FALSE	Tumor	Unknown	Not Reported	NA	NA	1	1428cd76-93d4-4e03-ad3c-ddb9166fa39c	0.3	1.5	No	Stage I	0	list(treatment_intent_type = c(NA, NA), updated_datetime = c("2019-07-31T18:37:22.401888-05:00", "2019-07-31T18:37:22.401888-05:00"), treatment_id = c("7030e1c7-ef02-5a84-8040-005b8390346a", "c657c585-b91c-5bd8-b3c4-ad31ac8d7945"), submitter_id = c("TCGA-CM-4744_treatment", "TCGA-CM-4744_treatment_1"), treatment_type = c("Radiation Therapy, NOS", "Pharmaceutical Therapy, NOS"), state = c("release…	not reported	Cecum	609	25506	Adenocarcinoma, NOS	no	2010	No	NA	T2	1940-03-01	N0	M0	not reported	268f0995-b3ad-5915-99a9-0fbb28923454	C18.0	Cecum	Not Reported	not reported	Not Reported	7f8bdcf2-9605-5988-9e0a-33993825144b	white
TCGA-AA-3553-01A-01R-0821-07	TCGA-AA-3553	TCGA-AA-3553-01A	TP	Primary solid Tumor	TCGA-AA-3553-01A	1	Primary	b1dcd03c-3cdd-4c23-9391-c5adeebff489	TCGA-AA-3553	Primary Tumor	NA	Solid Tissue	released	FALSE	Tumor	Unknown	Not Reported	NA	NA	0.8	b7a765ae-6321-4f5e-8894-7b23b6c39bd6	0.3	0.8	No	Stage I	0	list(days_to_treatment_end = c(NA, NA), days_to_treatment_start = c(NA, NA), treatment_id = c("99c8a797-ec3d-5155-bfab-def806ec4f8f", "a7e97754-cd30-50a6-8c98-dd013a99882d"), submitter_id = c("TCGA-AA-3553_treatment_1", "TCGA-AA-3553_treatment"), treatment_type = c("Pharmaceutical Therapy, NOS", "Radiation Therapy, NOS"), regimen_or_line_of_therapy = c(NA, NA), treatment_effect = c(NA, NA), thera…	not reported	Colon, NOS	730	22524	Adenocarcinoma, NOS	no	2008	No	6th	T2	1940-03-01	N0	M0	not reported	82bcc93b-4f76-58fb-b12a-027fb0b018a4	C18.9	Colon, NOS	Not Reported	not reported	Not Reported	b345da5f-84a4-5b83-9106-ddb8a0b4771c	not reported
TCGA-F4-6569-01A-11R-1774-07	TCGA-F4-6569	TCGA-F4-6569-01A	TP	Primary solid Tumor	TCGA-F4-6569-01A	1	Primary	bbb4b282-5414-4929-a9f6-08b733d14fa7	TCGA-F4-6569	Primary Tumor	NA	Solid Tissue	released	FALSE	Tumor	Unknown	Not Reported	NA	NA	1.3	7ab8bd50-444e-48eb-bb37-3b64fecfefe8	0.6	2.3	No	Stage I	0	list(treatment_intent_type = c(NA, NA), updated_datetime = c("2019-07-31T18:37:48.496806-05:00", "2019-07-31T18:37:48.496806-05:00"), treatment_id = c("94626453-b9b2-5f14-8003-9ee7ed8f4792", "a341ead7-4900-5b72-8f13-f88b9d8f6769"), submitter_id = c("TCGA-F4-6569_treatment", "TCGA-F4-6569_treatment_1"), treatment_type = c("Radiation Therapy, NOS", "Pharmaceutical Therapy, NOS"), state = c("release…	not reported	Colon, NOS	1087	22203	Adenocarcinoma, NOS	no	2011	No	7th	T2	1940-03-01	N0	M0	not reported	ec17048e-f3d3-5384-a493-04b209c0f89c	C18.9	Colon, NOS	Not Reported	not reported	Not Reported	2a81c23d-0043-543e-8038-5fa0de1d9fa7	white
TCGA-CM-6678-01A-11R-1839-07	TCGA-CM-6678	TCGA-CM-6678-01A	TP	Primary solid Tumor	TCGA-CM-6678-01A	1	Primary	010eccdb-0d4b-4808-b210-8c462ad05925	TCGA-CM-6678	Primary Tumor	NA	Solid Tissue	released	FALSE	Tumor	Unknown	Not Reported	NA	NA	1.3	b9528d91-a511-4057-be4b-86c1496778ff	0.5	2	No	Stage IVA	0	list(days_to_treatment_end = c(NA, NA), days_to_treatment_start = c(NA, NA), treatment_id = c("2fb9b54c-cb55-58f2-bc4e-f838a4385815", "3861350f-14e5-57d8-93d0-fefb9830d264"), submitter_id = c("TCGA-CM-6678_treatment_1", "TCGA-CM-6678_treatment"), treatment_type = c("Pharmaceutical Therapy, NOS", "Radiation Therapy, NOS"), regimen_or_line_of_therapy = c(NA, NA), treatment_effect = c(NA, NA), thera…	not reported	Sigmoid colon	335	23070	Adenocarcinoma, NOS	no	2011	No	7th	T4a	1940-03-01	N1c	M1a	not reported	b44c595d-245a-5b2c-baab-ee22c6c63cdf	C18.7	Sigmoid colon	Not Reported	not reported	Not Reported	1009d9d0-0cdb-53e2-879c-c81ab3d03e23	white
TCGA-A6-2685-01A-01R-1410-07	TCGA-A6-2685	TCGA-A6-2685-01A	TP	Primary solid Tumor	TCGA-A6-2685-01A	1	Primary	91bec9df-1d87-41e0-81f0-7b7b33a8a72a	TCGA-A6-2685	Primary Tumor	NA	Solid Tissue	released	FALSE	Tumor	Unknown	Not Reported	NA	NA	0.6	4d01d457-e681-48c9-ac38-323c582105c3	0.6	2	No	Stage IIA	0	list(treatment_intent_type = c(NA, NA), updated_datetime = c("2019-07-31T18:39:22.135471-05:00", "2019-07-31T18:39:22.135471-05:00"), treatment_id = c("d8b36390-a3b4-525a-85a7-6add9ca4f63b", "e93ad888-d928-5f75-a663-117851c91ad9"), submitter_id = c("TCGA-A6-2685_treatment", "TCGA-A6-2685_treatment_1"), treatment_type = c("Radiation Therapy, NOS", "Pharmaceutical Therapy, NOS"), state = c("release…	not reported	Colon, NOS	1133	17757	Adenocarcinoma, NOS	no	2009	No	6th	T3	1940-03-01	N0	M0	not reported	5282aefe-aaaf-5d5a-9073-890938f1b777	C18.9	Colon, NOS	Not Reported	not reported	Not Reported	a45b3215-b662-5f61-be50-d538709c6ff7	black or african american
TCGA-NH-A6GB-01A-11R-A37K-07	TCGA-NH-A6GB	TCGA-NH-A6GB-01A	TP	Primary solid Tumor	TCGA-NH-A6GB-01A	1	Primary	f4271689-b9a3-4493-9be0-3cb059e626a7	TCGA-NH-A6GB	Primary Tumor	FALSE	Solid Tissue	released	FALSE	Tumor	Unknown	Not Reported	78	750	NA	163923CC-A65E-4F0F-83CC-D0CA33C8F35E	NA	NA	No	Stage IIIC	0	list(days_to_treatment_end = c(NA, NA), days_to_treatment_start = c(NA, NA), treatment_id = c("471bf91d-6f82-593e-8208-07916c1958ab", "7d197c62-029e-57d5-a1e4-1202a2b62779"), submitter_id = c("TCGA-NH-A6GB_treatment_1", "TCGA-NH-A6GB_treatment"), treatment_type = c("Pharmaceutical Therapy, NOS", "Radiation Therapy, NOS"), regimen_or_line_of_therapy = c(NA, NA), treatment_effect = c(NA, NA), thera…	not reported	Transverse colon	476	26100	Adenocarcinoma, NOS	no	2013	No	7th	T3	1940-03-01	N2b	MX	not reported	0f68ad1d-46cc-51a2-99bc-7d11cb21f7f4	C18.4	Transverse colon	Not Reported	not reported	Not Reported	75561060-6ac1-5615-9a48-a6545661492a	black or african american
TCGA-F4-6805-01A-11R-1839-07	TCGA-F4-6805	TCGA-F4-6805-01A	TP	Primary solid Tumor	TCGA-F4-6805-01A	1	Primary	6a3170a2-0064-44eb-a247-4712d6a85c9b	TCGA-F4-6805	Primary Tumor	NA	Solid Tissue	released	FALSE	Tumor	Unknown	Not Reported	NA	NA	1.7	c6183fed-cfc7-4e3d-a934-845331ff5ccf	0.4	2	No	Stage IIA	0	list(days_to_treatment_end = c(NA, NA), days_to_treatment_start = c(NA, NA), treatment_id = c("349addac-5bd9-57a9-a98c-a40e0345aefa", "f114d698-1483-5190-ab4b-cee6a3fd98f6"), submitter_id = c("TCGA-F4-6805_treatment_1", "TCGA-F4-6805_treatment"), treatment_type = c("Pharmaceutical Therapy, NOS", "Radiation Therapy, NOS"), regimen_or_line_of_therapy = c(NA, NA), treatment_effect = c(NA, NA), thera…	not reported	Colon, NOS	1047	21241	Adenocarcinoma, NOS	no	2011	No	7th	T3	1940-03-01	N0	M0	not reported	465c0b70-1e08-5eef-9b2f-b238a1148d71	C18.9	Colon, NOS	Not Reported	not reported	Not Reported	300a533a-8cf3-54ed-8c8c-4ce60d5d8453	white
TCGA-A6-5657-01A-01R-A32Z-07	TCGA-A6-5657	TCGA-A6-5657-01A	TP	Primary solid Tumor	TCGA-A6-5657-01A	1	Primary	05711fa9-46f4-43fd-a293-4969790f1004	TCGA-A6-5657	Primary Tumor	NA	Solid Tissue	released	FALSE	Tumor	Unknown	Not Reported	NA	NA	1	58264a19-4619-4e74-925b-4f3740a7a29f	0.4	1.3	No	Stage IIIB	0	list(treatment_intent_type = c(NA, NA), updated_datetime = c("2019-07-31T18:38:32.901134-05:00", "2019-07-31T18:38:32.901134-05:00"), treatment_id = c("552163af-3733-5e62-a88e-7784a4531d48", "852c7cdc-8900-54a0-ac79-613444c00a7b"), submitter_id = c("TCGA-A6-5657_treatment", "TCGA-A6-5657_treatment_1"), treatment_type = c("Radiation Therapy, NOS", "Pharmaceutical Therapy, NOS"), state = c("release…	not reported	Colon, NOS	962	23920	Adenocarcinoma, NOS	no	2010	No	NA	T3	1940-03-01	N1	M0	not reported	e664e65a-7980-53f1-a4ab-82c1296b41ab	C18.9	Colon, NOS	Not Reported	not reported	Not Reported	0bd3074c-0ce4-5e11-a69c-c440a7b62d15	black or african american
TCGA-AA-3685-01A-02R-A32Z-07	TCGA-AA-3685	TCGA-AA-3685-01A	TP	Primary solid Tumor	TCGA-AA-3685-01A	1	Primary	a2dd99bf-3a02-42cd-9aa8-80a018584ee6	TCGA-AA-3685	Primary Tumor	NA	Solid Tissue	released	FALSE	Tumor	Unknown	Not Reported	NA	NA	0.7	26cc9ea1-5415-4fbb-958c-f9fc005bf8e0	0.4	0.9	No	Stage II	0	list(treatment_intent_type = c(NA, NA), updated_datetime = c("2019-07-31T18:38:38.783979-05:00", "2019-07-31T18:38:38.783979-05:00"), treatment_id = c("13bae645-6be0-559d-a11e-30cfa66337d9", "3c4f33ab-45bb-55de-896d-c3c369a79e9a"), submitter_id = c("TCGA-AA-3685_treatment", "TCGA-AA-3685_treatment_1"), treatment_type = c("Radiation Therapy, NOS", "Pharmaceutical Therapy, NOS"), state = c("release…	not reported	Colon, NOS	1127	25506	Adenocarcinoma, NOS	no	2007	No	5th	T3	1940-03-01	N0	M0	not reported	8d5bb704-3dbc-5503-9d69-95de3313d6d9	C18.9	Colon, NOS	Not Reported	not reported	Not Reported	6230be3b-39f1-5535-a058-62eda31c5cf5	not reported
TCGA-AA-A00N-01A-02R-A00A-07	TCGA-AA-A00N	TCGA-AA-A00N-01A	TP	Primary solid Tumor	TCGA-AA-A00N-01A	1	Primary	d52f3d05-1850-473e-8e1e-ab2b4f88af2a	TCGA-AA-A00N	Primary Tumor	FALSE	Solid Tissue	released	FALSE	Tumor	Unknown	Not Reported	599	380	NA	8A14A987-711E-49C0-AA34-2F035B02CD8A	NA	NA	No	Stage IIB	0	list(days_to_treatment_end = c(NA, NA), days_to_treatment_start = c(NA, NA), treatment_id = c("20c99f24-8d92-5a51-9678-f0126609e625", "246008df-b04d-5635-a6eb-06109133a5af"), submitter_id = c("TCGA-AA-A00N_treatment_1", "TCGA-AA-A00N_treatment"), treatment_type = c("Pharmaceutical Therapy, NOS", "Radiation Therapy, NOS"), regimen_or_line_of_therapy = c(NA, NA), treatment_effect = c(NA, NA), thera…	not reported	Cecum	NA	27667	Mucinous adenocarcinoma	no	2008	No	6th	T4	1980-03-01	N0	M0	not reported	64590599-9ebb-51e3-802d-94e0e3cc904f	C18.0	Cecum	Not Reported	not reported	Not Reported	edd6db19-831e-5523-ac7e-d41b18136b95	not reported
TCGA-AA-3680-01A-01R-0905-07	TCGA-AA-3680	TCGA-AA-3680-01A	TP	Primary solid Tumor	TCGA-AA-3680-01A	1	Primary	5452ad7b-5c57-485b-80c4-008d922ecee6	TCGA-AA-3680	Primary Tumor	NA	Solid Tissue	released	FALSE	Tumor	Unknown	Not Reported	NA	NA	0.8	0cec2f9e-19b2-4d7f-8ecf-1545393b9a3b	0.2	1	No	Stage IV	0	list(days_to_treatment_end = c(NA, NA), days_to_treatment_start = c(NA, NA), treatment_id = c("93efa49d-db1f-5f06-a00c-aeedf13aec0b", "c889f7a4-047c-56c5-b879-ea036b69e768"), submitter_id = c("TCGA-AA-3680_treatment_1", "TCGA-AA-3680_treatment"), treatment_type = c("Pharmaceutical Therapy, NOS", "Radiation Therapy, NOS"), regimen_or_line_of_therapy = c(NA, NA), treatment_effect = c(NA, NA), thera…	not reported	Cecum	0	24655	Adenocarcinoma, NOS	no	2006	No	6th	T4	1940-03-01	N2	M1	not reported	e90d31fe-1e81-543a-8639-31fce539a335	C18.0	Cecum	Not Reported	not reported	Not Reported	6458d194-2873-53c0-8729-13327eb4919f	not reported
TCGA-DM-A1D6-01A-21R-A155-07	TCGA-DM-A1D6	TCGA-DM-A1D6-01A	TP	Primary solid Tumor	TCGA-DM-A1D6-01A	1	Primary	31ee769f-14d5-4cc3-b25f-76ca354bdb1b	TCGA-DM-A1D6	Primary Tumor	FALSE	Solid Tissue	released	FALSE	Tumor	Unknown	Not Reported	3909	160	NA	A73A51CC-5DDB-4D1D-ABDC-858856CC3B8D	NA	NA	No	Stage IIA	0	list(days_to_treatment_end = c(NA, NA), days_to_treatment_start = c(NA, NA), treatment_id = c("86d37584-e148-5335-b76d-c9df58655f0d", "8c7e4e2b-0041-5e57-bae5-afd2869ae2da"), submitter_id = c("TCGA-DM-A1D6_treatment_1", "TCGA-DM-A1D6_treatment"), treatment_type = c("Pharmaceutical Therapy, NOS", "Radiation Therapy, NOS"), regimen_or_line_of_therapy = c(NA, NA), treatment_effect = c(NA, NA), thera…	not reported	Splenic flexure of colon	570	32302	Mucinous adenocarcinoma	no	2000	No	NA	T3	1980-03-01	N0	M0	not reported	5c5f200a-02c0-538d-b1a9-a758ca14ea9b	C18.5	Splenic flexure of colon	Not Reported	not reported	Not Reported	dbfdfebc-4f8d-5089-bbd8-4bcac7d8624e	white
TCGA-A6-5656-01B-02R-A277-07	TCGA-A6-5656	TCGA-A6-5656-01B	TP	Primary solid Tumor	TCGA-A6-5656-01B	1	Primary	0230996e-7ee3-4360-a790-fb420d0b60ba	TCGA-A6-5656	Primary Tumor	FALSE	Solid Tissue	released	TRUE	Tumor	FFPE	Not Reported	589	NA	NA	9396cc9f-adf9-4e3e-9cb4-c0a5190299b9	NA	NA	No	Stage I	0	list(days_to_treatment_end = c(NA, NA), days_to_treatment_start = c(NA, NA), treatment_id = c("a4155406-552e-52d2-8697-3311c99a6dce", "aa8e8952-5377-5f83-8641-26e7b45d2929"), submitter_id = c("TCGA-A6-5656_treatment_1", "TCGA-A6-5656_treatment"), treatment_type = c("Pharmaceutical Therapy, NOS", "Radiation Therapy, NOS"), regimen_or_line_of_therapy = c(NA, NA), treatment_effect = c(NA, NA), thera…	not reported	Sigmoid colon	1001	27184	Adenocarcinoma, NOS	no	2010	No	7th	T2	1940-03-01	N0	M0	not reported	028a6c81-e6ad-54d6-b704-f2e221dc1175	C18.7	Sigmoid colon	Not Reported	not reported	Not Reported	54d036be-6b9d-5230-9bd2-ee10f7b4e636	white
TCGA-CM-6165-01A-11R-1653-07	TCGA-CM-6165	TCGA-CM-6165-01A	TP	Primary solid Tumor	TCGA-CM-6165-01A	1	Primary	0d1b5f70-169a-415f-93f3-efe0ccc0e4c7	TCGA-CM-6165	Primary Tumor	NA	Solid Tissue	released	FALSE	Tumor	Unknown	Not Reported	NA	NA	0.6	8837ac56-ad16-4bb7-9cea-dc712e0ae524	0.4	0.7	No	Stage IIA	0	list(treatment_intent_type = c(NA, NA), updated_datetime = c("2019-07-31T18:40:26.830700-05:00", "2019-07-31T18:40:26.830700-05:00"), treatment_id = c("5783d78a-5733-5c85-aa15-9399262eda20", "9706e62f-bc9d-51cc-b507-79c4f5666c58"), submitter_id = c("TCGA-CM-6165_treatment", "TCGA-CM-6165_treatment_1"), treatment_type = c("Radiation Therapy, NOS", "Pharmaceutical Therapy, NOS"), state = c("release…	not reported	Sigmoid colon	488	27302	Adenocarcinoma, NOS	no	2010	No	7th	T3	1940-03-01	N0	M0	not reported	1ed95394-78fd-5ce8-943c-2444c934e5fa	C18.7	Sigmoid colon	Not Reported	not reported	Not Reported	4518474e-0e5f-597e-9612-7a2dabf1aee5	white
TCGA-AA-A00W-01A-01R-A002-07	TCGA-AA-A00W	TCGA-AA-A00W-01A	TP	Primary solid Tumor	TCGA-AA-A00W-01A	1	Primary	b1399cb9-c870-4c6d-9afe-a85435437ef6	TCGA-AA-A00W	Primary Tumor	FALSE	Solid Tissue	released	FALSE	Tumor	Unknown	Not Reported	660	240	NA	57E011E8-44BE-4821-8AB0-7A4F22AC4C4B	NA	NA	No	Stage I	0	list(treatment_intent_type = c(NA, NA), updated_datetime = c("2019-07-31T15:13:58.430021-05:00", "2019-07-31T15:13:58.430021-05:00"), treatment_id = c("a74a042c-c3aa-58b0-b583-7860a1e0deb8", "d54b51ac-58a9-5e02-8c65-c8abfc302f8c"), submitter_id = c("TCGA-AA-A00W_treatment", "TCGA-AA-A00W_treatment_1"), treatment_type = c("Radiation Therapy, NOS", "Pharmaceutical Therapy, NOS"), state = c("release…	not reported	Sigmoid colon	456	29311	Adenocarcinoma, NOS	no	2008	No	6th	T1	1940-03-01	N0	M0	not reported	e97e2807-cbb0-5d33-ab4d-cc15f92ad909	C18.7	Sigmoid colon	Not Reported	not reported	Not Reported	fd914963-445f-57a1-932f-269d240b73ac	not reported
TCGA-A6-2683-11A-01R-A32Z-07	TCGA-A6-2683	TCGA-A6-2683-11A	NT	Solid Tissue Normal	TCGA-A6-2683-11A	11	Not Applicable	5c7de7c6-7a72-4185-a72c-1d25d4ab07fe	TCGA-A6-2683	Solid Tissue Normal	NA	Solid Tissue	released	FALSE	Normal	Unknown	Not Reported	NA	NA	0.8	NA	0.5	1.2	No	Stage IV	0	list(days_to_treatment_end = c(NA, NA), days_to_treatment_start = c(NA, NA), treatment_id = c("8a9c5c85-56b3-50e9-b8ea-071903a4e78d", "c2de6f20-10a7-537a-9915-eb0dabca66d9"), submitter_id = c("TCGA-A6-2683_treatment_1", "TCGA-A6-2683_treatment"), treatment_type = c("Pharmaceutical Therapy, NOS", "Radiation Therapy, NOS"), regimen_or_line_of_therapy = c(NA, NA), treatment_effect = c(NA, NA), thera…	not reported	Ascending colon	472	20871	Adenocarcinoma, NOS	no	2009	No	6th	T4	1940-03-01	N0	M1	not reported	ddb1d720-03f7-5d3f-b3b4-8dd94d3d1341	C18.2	Ascending colon	Not Reported	not reported	Not Reported	5f385b32-374e-5ef7-8fab-269b74c1a020	white
TCGA-D5-6530-01A-11R-1723-07	TCGA-D5-6530	TCGA-D5-6530-01A	TP	Primary solid Tumor	TCGA-D5-6530-01A	1	Primary	50560725-c72d-4bab-b602-5e50e6bececd	TCGA-D5-6530	Primary Tumor	NA	Solid Tissue	released	FALSE	Tumor	Unknown	Not Reported	NA	NA	0.6	5a7b76ed-d0d1-45a6-814c-3dffb6f4b717	0.6	1	No	Stage I	0	list(treatment_intent_type = c(NA, NA), updated_datetime = c("2019-07-31T18:40:44.676093-05:00", "2019-07-31T18:40:44.676093-05:00"), treatment_id = c("87a6f2d1-5555-5ee6-9c2f-0f7a8cfcb7c2", "e14c084f-328b-59ad-bad6-8bd920d8a9cc"), submitter_id = c("TCGA-D5-6530_treatment", "TCGA-D5-6530_treatment_1"), treatment_type = c("Radiation Therapy, NOS", "Pharmaceutical Therapy, NOS"), state = c("release…	not reported	Cecum	621	19591	Adenocarcinoma, NOS	no	2010	No	7th	T2	1940-03-01	N0	M0	not reported	0971e0f4-22cd-550e-bc80-012515dcf658	C18.0	Cecum	Not Reported	not reported	Not Reported	9f60b577-6c08-540e-b38b-faf3e5438708	white
TCGA-AA-3660-11A-01R-1723-07	TCGA-AA-3660	TCGA-AA-3660-11A	NT	Solid Tissue Normal	TCGA-AA-3660-11A	11	Not Applicable	a0832917-75b9-45c8-9273-009c3737a43a	TCGA-AA-3660	Solid Tissue Normal	NA	Solid Tissue	released	FALSE	Normal	Unknown	Not Reported	NA	NA	0.6	NA	0.3	1	No	Stage II	0	list(days_to_treatment_end = c(NA, NA), days_to_treatment_start = c(NA, NA), treatment_id = c("58e82586-9e95-50f3-aa35-86ce548d60bf", "67987cc9-22df-5fe6-b7a5-c12589b19dbb"), submitter_id = c("TCGA-AA-3660_treatment_1", "TCGA-AA-3660_treatment"), treatment_type = c("Pharmaceutical Therapy, NOS", "Radiation Therapy, NOS"), regimen_or_line_of_therapy = c(NA, NA), treatment_effect = c(NA, NA), thera…	not reported	Colon, NOS	2375	18932	Adenocarcinoma, NOS	no	2005	No	5th	T3	1940-03-01	N0	M0	not reported	0c65cb46-40f0-59f1-898f-1726882ee790	C18.9	Colon, NOS	Not Reported	not reported	Not Reported	0ceff1f3-fff5-52a8-a72f-3128ca6e0cfb	not reported
TCGA-AZ-6608-01A-11R-1839-07	TCGA-AZ-6608	TCGA-AZ-6608-01A	TP	Primary solid Tumor	TCGA-AZ-6608-01A	1	Primary	f6ce2f9b-b631-47e7-a32b-eaeaed4cf008	TCGA-AZ-6608	Primary Tumor	NA	Solid Tissue	released	FALSE	Tumor	Unknown	Not Reported	NA	NA	1.4	75a5b0f7-23f0-41de-b863-9029a57ff12d	0.1	2	Not Reported	Stage IIIA	0	list(treatment_intent_type = c(NA, NA), updated_datetime = c("2019-07-31T18:40:12.911096-05:00", "2019-07-31T18:40:12.911096-05:00"), treatment_id = c("99ff5617-50c0-5cb8-9abe-cd90505a4482", "c7e899c7-4ec4-5b90-92b4-19dc340df99e"), submitter_id = c("TCGA-AZ-6608_treatment", "TCGA-AZ-6608_treatment_1"), treatment_type = c("Radiation Therapy, NOS", "Pharmaceutical Therapy, NOS"), state = c("release…	not reported	Sigmoid colon	NA	20094	Adenocarcinoma, NOS	yes	2009	No	6th	T2	1940-03-01	N1	M0	not reported	9e0f85cf-055d-57cf-9d23-3d8920de8d0d	C18.7	Sigmoid colon	Not Reported	not reported	Not Reported	a03215f3-f1e7-575c-92e7-8c49364d23ec	white
TCGA-A6-2682-01A-01R-1410-07	TCGA-A6-2682	TCGA-A6-2682-01A	TP	Primary solid Tumor	TCGA-A6-2682-01A	1	Primary	f10f139d-1d7f-4923-8129-f103f5d3163b	TCGA-A6-2682	Primary Tumor	NA	Solid Tissue	released	FALSE	Tumor	Unknown	Not Reported	NA	NA	0.8	b6280abb-7ccf-4fdb-ad83-65d8b98dfbba	0.5	2.5	Not Reported	Stage IV	0	list(days_to_treatment_end = c(NA, NA), days_to_treatment_start = c(NA, NA), treatment_id = c("4a318ee5-fa3e-5fa7-bc0d-37d2372f97a6", "cdd15d7c-e705-57fd-a8b6-c7105dc1d012"), submitter_id = c("TCGA-A6-2682_treatment_1", "TCGA-A6-2682_treatment"), treatment_type = c("Pharmaceutical Therapy, NOS", "Radiation Therapy, NOS"), regimen_or_line_of_therapy = c(NA, NA), treatment_effect = c(NA, NA), thera…	not reported	Colon, NOS	NA	25683	Adenocarcinoma, NOS	yes	2009	No	6th	T4b	1940-03-01	N1	M1	not reported	6d721115-f251-55c5-a46e-098461255a58	C18.9	Colon, NOS	Not Reported	not reported	Not Reported	e2210069-1a77-588c-91b3-ef8b42698818	white
TCGA-A6-2682-11A-01R-A32Z-07	TCGA-A6-2682	TCGA-A6-2682-11A	NT	Solid Tissue Normal	TCGA-A6-2682-11A	11	Not Applicable	668f20bb-26e0-4064-a5e4-4a7385f6863d	TCGA-A6-2682	Solid Tissue Normal	NA	Solid Tissue	released	FALSE	Normal	Unknown	Not Reported	NA	NA	0.8	NA	0.5	1.7	Not Reported	Stage IV	0	list(days_to_treatment_end = c(NA, NA), days_to_treatment_start = c(NA, NA), treatment_id = c("4a318ee5-fa3e-5fa7-bc0d-37d2372f97a6", "cdd15d7c-e705-57fd-a8b6-c7105dc1d012"), submitter_id = c("TCGA-A6-2682_treatment_1", "TCGA-A6-2682_treatment"), treatment_type = c("Pharmaceutical Therapy, NOS", "Radiation Therapy, NOS"), regimen_or_line_of_therapy = c(NA, NA), treatment_effect = c(NA, NA), thera…	not reported	Colon, NOS	NA	25683	Adenocarcinoma, NOS	yes	2009	No	6th	T4b	1940-03-01	N1	M1	not reported	6d721115-f251-55c5-a46e-098461255a58	C18.9	Colon, NOS	Not Reported	not reported	Not Reported	e2210069-1a77-588c-91b3-ef8b42698818	white
TCGA-AD-6895-01A-11R-1928-07	TCGA-AD-6895	TCGA-AD-6895-01A	TP	Primary solid Tumor	TCGA-AD-6895-01A	1	Primary	72930683-b2dc-4cd8-8a0b-0cf57c77b1a9	TCGA-AD-6895	Primary Tumor	NA	Solid Tissue	released	FALSE	Tumor	Unknown	Not Reported	NA	NA	0.3	84a1cc4e-7e89-4f7d-915a-59521640bb59	0.1	0.3	Not Reported	Stage IIIB	0	list(treatment_intent_type = c(NA, NA), updated_datetime = c("2019-07-31T18:28:08.017634-05:00", "2019-07-31T18:28:08.017634-05:00"), treatment_id = c("1a3760ee-1f4c-54de-a549-014a4edc68df", "6c22ae52-6ca4-5f87-8df9-96f0adf344ba"), submitter_id = c("TCGA-AD-6895_treatment", "TCGA-AD-6895_treatment_1"), treatment_type = c("Radiation Therapy, NOS", "Pharmaceutical Therapy, NOS"), state = c("release…	not reported	Cecum	763	30879	Adenocarcinoma, NOS	yes	2011	No	7th	T3	1940-03-01	N1a	M0	not reported	63b14ab8-f769-59de-8461-511bb8940309	C18.0	Cecum	Not Reported	not reported	Not Reported	3d32a6e4-b7bd-54ce-ae03-3e94b6364998	white
TCGA-CK-5912-01A-11R-1653-07	TCGA-CK-5912	TCGA-CK-5912-01A	TP	Primary solid Tumor	TCGA-CK-5912-01A	1	Primary	78eecddd-e0d2-4f8a-821a-7e412f92e754	TCGA-CK-5912	Primary Tumor	NA	Solid Tissue	released	FALSE	Tumor	Unknown	Not Reported	NA	NA	0.4	2c2d886b-8d41-44a3-b1a2-18befb07d126	0.2	0.5	Not Reported	Stage I	0	list(days_to_treatment_end = c(NA, NA), days_to_treatment_start = c(NA, NA), treatment_id = c("2ecd6a9b-9f24-5558-8fd8-b1771704df5c", "65b59181-cce4-574f-9494-51f55fcf7bf7"), submitter_id = c("TCGA-CK-5912_treatment_1", "TCGA-CK-5912_treatment"), treatment_type = c("Pharmaceutical Therapy, NOS", "Radiation Therapy, NOS"), regimen_or_line_of_therapy = c(NA, NA), treatment_effect = c(NA, NA), thera…	not reported	Ascending colon	1466	29938	Adenocarcinoma, NOS	yes	2006	No	6th	T2	1940-03-01	N0	MX	not reported	bc4f42f3-9c31-5bc6-b90a-5ad1b9ee7067	C18.2	Cecum	Not Reported	not reported	Not Reported	8ae1ca9d-55e4-51d7-9c6a-aa0fc6768539	white
TCGA-AA-3970-01A-01R-1022-07	TCGA-AA-3970	TCGA-AA-3970-01A	TP	Primary solid Tumor	TCGA-AA-3970-01A	1	Primary	767a5260-34f4-4bed-9cda-305bc431a402	TCGA-AA-3970	Primary Tumor	NA	Solid Tissue	released	FALSE	Tumor	Unknown	Not Reported	NA	NA	0.5	72bffe46-a121-4488-acdc-0ffd4e57cabe	0.5	1	No	Stage IIA	0	list(treatment_intent_type = c(NA, NA), updated_datetime = c("2019-07-31T18:30:30.983631-05:00", "2019-07-31T18:30:30.983631-05:00"), treatment_id = c("05375ca5-c32c-5d33-b5b5-7fa30f7bbbaf", "644d5687-950a-5d1b-ad32-7a868ebe31e7"), submitter_id = c("TCGA-AA-3970_treatment", "TCGA-AA-3970_treatment_1"), treatment_type = c("Radiation Therapy, NOS", "Pharmaceutical Therapy, NOS"), state = c("release…	not reported	Descending colon	1096	23741	Adenocarcinoma, NOS	no	2009	No	6th	T3	1940-03-01	N0	M0	not reported	744c1892-7d2b-5526-b8f2-8132b4f43322	C18.6	Descending colon	Not Reported	not reported	Not Reported	9e5ffdcf-3144-58be-befc-4f0a7b8454b4	not reported
TCGA-AA-3522-11A-01R-A32Z-07	TCGA-AA-3522	TCGA-AA-3522-11A	NT	Solid Tissue Normal	TCGA-AA-3522-11A	11	Not Applicable	218bbd07-5fa3-4946-a2c1-0ece13466441	TCGA-AA-3522	Solid Tissue Normal	NA	Solid Tissue	released	FALSE	Normal	Unknown	Not Reported	NA	NA	0.6	NA	0.2	1.2	Not Reported	Stage IIA	0	list(treatment_intent_type = c(NA, NA), updated_datetime = c("2019-07-31T18:38:14.744288-05:00", "2019-07-31T18:38:14.744288-05:00"), treatment_id = c("2c99bb28-6a7e-5f5f-acaa-32edbd6ddb39", "3598dd59-cccb-53ca-9074-cfb788673192"), submitter_id = c("TCGA-AA-3522_treatment", "TCGA-AA-3522_treatment_1"), treatment_type = c("Radiation Therapy, NOS", "Pharmaceutical Therapy, NOS"), state = c("release…	not reported	Ascending colon	1127	24653	Adenocarcinoma, NOS	yes	2007	No	6th	T3	1940-03-01	N0	M0	not reported	d18fc9ab-3aef-57ac-97d8-3db794c2fc10	C18.2	Ascending colon	Not Reported	not reported	Not Reported	689e4e8a-4578-5e69-a2fb-039a55a620e1	not reported
TCGA-AA-3844-01A-01R-1022-07	TCGA-AA-3844	TCGA-AA-3844-01A	TP	Primary solid Tumor	TCGA-AA-3844-01A	1	Primary	fb550b01-76b0-4465-bcf5-b72a7e9a378c	TCGA-AA-3844	Primary Tumor	NA	Solid Tissue	released	FALSE	Tumor	Unknown	Not Reported	NA	NA	0.6	8445e6a1-3a39-4261-b971-d3409f6b88a3	0.3	1.2	Not Reported	Stage IIIC	0	list(treatment_intent_type = c(NA, NA), updated_datetime = c("2019-07-31T18:28:11.082544-05:00", "2019-07-31T18:28:11.082544-05:00"), treatment_id = c("70a33944-b1a3-53cb-a9f4-96c85f0f6cea", "d27e1763-e78a-5a5f-a7c9-b251c5096520"), submitter_id = c("TCGA-AA-3844_treatment", "TCGA-AA-3844_treatment_1"), treatment_type = c("Radiation Therapy, NOS", "Pharmaceutical Therapy, NOS"), state = c("release…	not reported	Colon, NOS	454	28521	Adenocarcinoma, NOS	yes	2009	No	6th	T3	1940-03-01	N2	M0	not reported	a48b545d-d9f0-5838-959c-879dd4073190	C18.9	Colon, NOS	Not Reported	not reported	Not Reported	55423021-6c5d-5770-a963-4529bcaba5a6	not reported
TCGA-AA-3496-11A-01R-1839-07	TCGA-AA-3496	TCGA-AA-3496-11A	NT	Solid Tissue Normal	TCGA-AA-3496-11A	11	Not Applicable	ca5bc217-abb6-4b03-b53b-59708fa888a6	TCGA-AA-3496	Solid Tissue Normal	NA	Solid Tissue	released	FALSE	Normal	Unknown	Not Reported	NA	NA	1	NA	0.6	1.5	Not Reported	Stage II	0	list(days_to_treatment_end = c(NA, NA), days_to_treatment_start = c(NA, NA), treatment_id = c("3a09db47-9fcd-5cd9-b500-c4a8548ce5a0", "443096e0-f539-5796-9219-5f14ba1cf294"), submitter_id = c("TCGA-AA-3496_treatment_1", "TCGA-AA-3496_treatment"), treatment_type = c("Pharmaceutical Therapy, NOS", "Radiation Therapy, NOS"), regimen_or_line_of_therapy = c(NA, NA), treatment_effect = c(NA, NA), thera…	not reported	Ascending colon	31	30438	Adenocarcinoma, NOS	yes	2002	No	5th	T3	1940-03-01	N0	M0	not reported	022fb21c-fd29-58e6-a679-db939bd10484	C18.2	Ascending colon	Not Reported	not reported	Not Reported	dad1859e-05f3-519d-a2a3-ab1972826c87	not reported
TCGA-A6-4105-01A-02R-1774-07	TCGA-A6-4105	TCGA-A6-4105-01A	TP	Primary solid Tumor	TCGA-A6-4105-01A	1	Primary	08c83da9-c037-464b-a68a-9df6e89ed861	TCGA-A6-4105	Primary Tumor	NA	Solid Tissue	released	FALSE	Tumor	Unknown	Not Reported	NA	NA	0.8	d2ce055f-3de6-4b96-96ad-133091cd0a8f	0.6	2.6	Not Reported	Stage IIA	0	list(days_to_treatment_end = c(NA, NA), days_to_treatment_start = c(NA, NA), treatment_id = c("4238cfe4-00fc-5c5e-89e1-14f22b7ed3b9", "bed4e335-ee3e-5006-ad0b-08ffefc4245a"), submitter_id = c("TCGA-A6-4105_treatment_1", "TCGA-A6-4105_treatment"), treatment_type = c("Pharmaceutical Therapy, NOS", "Radiation Therapy, NOS"), regimen_or_line_of_therapy = c(NA, NA), treatment_effect = c(NA, NA), thera…	not reported	Ascending colon	NA	29097	Adenocarcinoma, NOS	yes	2010	No	7th	T3	1940-03-01	N0	M0	not reported	5237b12c-b558-5d27-a19c-7bc99561a195	C18.2	Ascending colon	Not Reported	not reported	Not Reported	3ea0ef11-8fd3-569e-b6b3-e55fb4896765	white
TCGA-AZ-6601-11A-01R-1774-07	TCGA-AZ-6601	TCGA-AZ-6601-11A	NT	Solid Tissue Normal	TCGA-AZ-6601-11A	11	Not Applicable	3d8a2ec0-3d65-46e1-8b87-fa7e318d249e	TCGA-AZ-6601	Solid Tissue Normal	NA	Solid Tissue	released	FALSE	Normal	Unknown	Not Reported	NA	NA	2	NA	0.5	2	Not Reported	Stage II	0	list(days_to_treatment_end = c(NA, NA), days_to_treatment_start = c(NA, NA), treatment_id = c("862cb7c5-bbbb-5cd9-8bf8-cb67d190e399", "d58ea798-b0da-5e7f-aa5c-3b00f2b3d65e"), submitter_id = c("TCGA-AZ-6601_treatment_1", "TCGA-AZ-6601_treatment"), treatment_type = c("Pharmaceutical Therapy, NOS", "Radiation Therapy, NOS"), regimen_or_line_of_therapy = c(NA, NA), treatment_effect = c(NA, NA), thera…	not reported	Sigmoid colon	NA	25082	Adenocarcinoma, NOS	yes	2001	No	5th	T3	1940-03-01	N0	M0	not reported	c84584a8-1d17-50ac-a3e1-1051e2889a4d	C18.7	Sigmoid colon	Not Reported	not reported	Not Reported	1a4802ef-9a41-50b8-ad6c-4bc46941524c	white
TCGA-AA-3713-11A-01R-1723-07	TCGA-AA-3713	TCGA-AA-3713-11A	NT	Solid Tissue Normal	TCGA-AA-3713-11A	11	Not Applicable	8db16195-8f0e-4343-a250-b59fa7ec562f	TCGA-AA-3713	Solid Tissue Normal	NA	Solid Tissue	released	FALSE	Normal	Unknown	Not Reported	NA	NA	0.9	NA	0.5	1.2	Not Reported	Stage IV	0	list(days_to_treatment_end = c(NA, NA), days_to_treatment_start = c(NA, NA), treatment_id = c("b2ca8b86-fa98-5de3-82d0-4b94d51c18bc", "bf51a1f9-ed5a-5176-ace2-1b6abf655ade"), submitter_id = c("TCGA-AA-3713_treatment_1", "TCGA-AA-3713_treatment"), treatment_type = c("Pharmaceutical Therapy, NOS", "Radiation Therapy, NOS"), regimen_or_line_of_therapy = c(NA, NA), treatment_effect = c(NA, NA), thera…	not reported	Colon, NOS	579	24927	Adenocarcinoma, NOS	yes	2005	No	5th	T3	1940-03-01	N0	M1	not reported	9231d14e-e3d1-53f5-a137-341da3a9faa3	C18.9	Colon, NOS	Not Reported	not reported	Not Reported	d8149461-cc6c-5b92-810a-297b62d8582c	not reported
TCGA-AA-3939-01A-01R-1022-07	TCGA-AA-3939	TCGA-AA-3939-01A	TP	Primary solid Tumor	TCGA-AA-3939-01A	1	Primary	370b9830-927a-4885-93ba-c262b42ead27	TCGA-AA-3939	Primary Tumor	NA	Solid Tissue	released	FALSE	Tumor	Unknown	Not Reported	NA	NA	0.6	4a1c0305-9b03-4b34-8f88-b535db869f12	0.3	0.8	Not Reported	Stage IIA	0	list(days_to_treatment_end = c(NA, NA), days_to_treatment_start = c(NA, NA), treatment_id = c("94c6f137-08e3-5c71-834e-8c58397344fb", "e5677b7b-de12-58c3-b7e3-8b07663ad6aa"), submitter_id = c("TCGA-AA-3939_treatment_1", "TCGA-AA-3939_treatment"), treatment_type = c("Pharmaceutical Therapy, NOS", "Radiation Therapy, NOS"), regimen_or_line_of_therapy = c(NA, NA), treatment_effect = c(NA, NA), thera…	not reported	Colon, NOS	395	30439	Adenocarcinoma, NOS	yes	2009	No	6th	T3	1940-03-01	N0	M0	not reported	9f5a70d8-c9b5-5f98-8afd-48c62e1fbd55	C18.9	Colon, NOS	Not Reported	not reported	Not Reported	aca236d8-65b8-5efd-af51-3c170a2ef521	not reported
TCGA-AA-3952-01A-01R-1022-07	TCGA-AA-3952	TCGA-AA-3952-01A	TP	Primary solid Tumor	TCGA-AA-3952-01A	1	Primary	efbe740e-5ea0-425c-8d1b-ed00a02d7576	TCGA-AA-3952	Primary Tumor	NA	Solid Tissue	released	FALSE	Tumor	Unknown	Not Reported	NA	NA	0.6	9537881f-28e0-405f-8582-f3807185d4ec	0.3	0.9	Not Reported	Stage IIIC	0	list(days_to_treatment_end = c(NA, NA), days_to_treatment_start = c(NA, NA), treatment_id = c("4e6b03d9-fdc0-5543-8071-bfc736e3422a", "abc65800-c317-54ac-b189-1669a89b3a6d"), submitter_id = c("TCGA-AA-3952_treatment_1", "TCGA-AA-3952_treatment"), treatment_type = c("Pharmaceutical Therapy, NOS", "Radiation Therapy, NOS"), regimen_or_line_of_therapy = c(NA, NA), treatment_effect = c(NA, NA), thera…	not reported	Descending colon	NA	24868	Adenocarcinoma, NOS	yes	2008	No	6th	T3	1940-03-01	N2	M0	not reported	5bbd7063-8caf-5ee2-8f3f-8aee22dc150b	C18.6	Descending colon	Not Reported	not reported	Not Reported	7c1d0cef-95f9-5c0a-b26a-5dcd4227f00e	not reported
TCGA-AA-A00Z-01A-01R-A002-07	TCGA-AA-A00Z	TCGA-AA-A00Z-01A	TP	Primary solid Tumor	TCGA-AA-A00Z-01A	1	Primary	75a6a64e-11f0-41c8-9cba-179ae3333621	TCGA-AA-A00Z	Primary Tumor	FALSE	Solid Tissue	released	FALSE	Tumor	Unknown	Not Reported	630	110	NA	CDC060C5-854A-44FC-946B-66AB98D782A5	NA	NA	Not Reported	Stage IIA	0	list(treatment_intent_type = c(NA, NA), updated_datetime = c("2019-07-31T18:42:37.368206-05:00", "2019-07-31T18:42:37.368206-05:00"), treatment_id = c("98a25fa3-64e5-54eb-9dc4-f787857e9785", "caf43470-fe89-5cd5-9bb6-a4429469edc7"), submitter_id = c("TCGA-AA-A00Z_treatment", "TCGA-AA-A00Z_treatment_1"), treatment_type = c("Radiation Therapy, NOS", "Pharmaceutical Therapy, NOS"), state = c("release…	not reported	Sigmoid colon	669	25872	Adenocarcinoma, NOS	yes	2008	No	6th	T3	1940-03-01	N0	M0	not reported	ad169f28-2f31-5e2b-91ee-27c66ac7e804	C18.7	Sigmoid colon	Not Reported	not reported	Not Reported	8e0aebe1-61a1-50ff-b34a-c4d459ce9242	not reported
TCGA-AA-A024-01A-02R-A00A-07	TCGA-AA-A024	TCGA-AA-A024-01A	TP	Primary solid Tumor	TCGA-AA-A024-01A	1	Primary	e7891fe7-c65c-4b08-b2a0-71b72cf78eeb	TCGA-AA-A024	Primary Tumor	FALSE	Solid Tissue	released	FALSE	Tumor	Unknown	Not Reported	1554	1000	NA	48C27265-38FC-4291-8CB8-B10F577B2FEB	NA	NA	Not Reported	Stage II	0	list(days_to_treatment_end = c(NA, NA), days_to_treatment_start = c(NA, NA), treatment_id = c("5fa087ad-55e5-5a53-8b18-8637814240dc", "d7324fba-0be7-52a3-be12-17c544075129"), submitter_id = c("TCGA-AA-A024_treatment_1", "TCGA-AA-A024_treatment"), treatment_type = c("Pharmaceutical Therapy, NOS", "Radiation Therapy, NOS"), regimen_or_line_of_therapy = c(NA, NA), treatment_effect = c(NA, NA), thera…	not reported	Descending colon	61	29708	Mucinous adenocarcinoma	yes	2005	No	5th	T3	1980-03-01	N0	M0	not reported	b6823fc5-592e-5907-8862-c1a83edc1fed	C18.6	Descending colon	Not Reported	not reported	Not Reported	58023fca-e0f8-5691-9cd4-be5f5b013a02	not reported
TCGA-AA-3862-01A-01R-1022-07	TCGA-AA-3862	TCGA-AA-3862-01A	TP	Primary solid Tumor	TCGA-AA-3862-01A	1	Primary	4ea1a466-beb0-476e-8ae7-29c1f09ff7f6	TCGA-AA-3862	Primary Tumor	NA	Solid Tissue	released	FALSE	Tumor	Unknown	Not Reported	NA	NA	0.5	422e955e-99a6-42be-9cd9-0d67f6909c11	0.4	0.8	Not Reported	Stage IIA	0	list(days_to_treatment_end = c(NA, NA), days_to_treatment_start = c(NA, NA), treatment_id = c("8b9b6487-a08e-5c89-8704-bf1f33b361c8", "f72551b2-f940-5ecb-b0b1-0b9f5532414a"), submitter_id = c("TCGA-AA-3862_treatment_1", "TCGA-AA-3862_treatment"), treatment_type = c("Pharmaceutical Therapy, NOS", "Radiation Therapy, NOS"), regimen_or_line_of_therapy = c(NA, NA), treatment_effect = c(NA, NA), thera…	not reported	Ascending colon	914	30163	Adenocarcinoma, NOS	yes	2009	No	6th	T3	1940-03-01	N0	M0	not reported	eac426b6-824a-5ce0-8183-721ffb082625	C18.2	Ascending colon	Not Reported	not reported	Not Reported	5bcf366b-0e02-57b2-8236-ca75cd68d110	not reported
TCGA-AZ-4616-01A-21R-1839-07	TCGA-AZ-4616	TCGA-AZ-4616-01A	TP	Primary solid Tumor	TCGA-AZ-4616-01A	1	Primary	f1f8ef32-d706-4ac1-929b-f678491f2fd8	TCGA-AZ-4616	Primary Tumor	NA	Solid Tissue	released	FALSE	Tumor	Unknown	Not Reported	NA	NA	1	a2e6b613-40a7-4b4b-91f9-affb8541d909	0.3	1	No	Stage IV	0	list(days_to_treatment_end = c(NA, NA), days_to_treatment_start = c(NA, NA), treatment_id = c("8bde95a5-f07c-5e1c-8541-1bf5c4aaa0ec", "d8837b8c-c45c-5e85-98a7-9ad98aa99872"), submitter_id = c("TCGA-AZ-4616_treatment_1", "TCGA-AZ-4616_treatment"), treatment_type = c("Pharmaceutical Therapy, NOS", "Radiation Therapy, NOS"), regimen_or_line_of_therapy = c(NA, NA), treatment_effect = c(NA, NA), thera…	not reported	Cecum	NA	30043	Adenocarcinoma, NOS	no	2009	No	6th	T3	1940-03-01	N2	M1	not reported	34f404e6-5b64-52ca-a259-6880878b6045	C18.0	Cecum	Not Reported	not reported	Not Reported	d8709104-b43e-5b95-ab1d-9bdd0049e5b5	white
TCGA-AZ-4315-01A-01R-1410-07	TCGA-AZ-4315	TCGA-AZ-4315-01A	TP	Primary solid Tumor	TCGA-AZ-4315-01A	1	Primary	ba9e5603-bb1d-4aa8-93e4-40043164f143	TCGA-AZ-4315	Primary Tumor	NA	Solid Tissue	released	FALSE	Tumor	Unknown	Not Reported	NA	NA	1	927b4861-c24e-4ce4-b7dd-2c950f2fb947	0.5	1.4	No	Stage IIA	0	list(treatment_intent_type = c(NA, NA), updated_datetime = c("2019-07-31T18:38:47.442783-05:00", "2019-07-31T18:38:47.442783-05:00"), treatment_id = c("59a62fc2-4a1a-5297-b277-c793eb76b549", "dd8ccb8e-60ff-53fb-afae-32ef79e5d9a8"), submitter_id = c("TCGA-AZ-4315_treatment", "TCGA-AZ-4315_treatment_1"), treatment_type = c("Radiation Therapy, NOS", "Pharmaceutical Therapy, NOS"), state = c("release…	not reported	Cecum	1776	22340	Adenocarcinoma, NOS	no	2006	No	NA	T3	1940-03-01	N0	M0	not reported	3535d001-bb4e-5051-a9e5-a0c01e21137e	C18.0	Cecum	Not Reported	not reported	Not Reported	16fc04e6-2680-5fbd-acd8-90aa02789857	white
TCGA-AA-3712-01A-21R-1723-07	TCGA-AA-3712	TCGA-AA-3712-01A	TP	Primary solid Tumor	TCGA-AA-3712-01A	1	Primary	a34342d8-c1b5-4043-aaad-23d2c63a5241	TCGA-AA-3712	Primary Tumor	NA	Solid Tissue	released	FALSE	Tumor	Unknown	Not Reported	NA	NA	0.6	dea49acf-c268-4547-ae88-d7a5cfdb5808	0.6	0.7	No	Stage III	0	list(treatment_intent_type = c(NA, NA), updated_datetime = c("2019-07-31T18:25:49.559834-05:00", "2019-07-31T18:25:49.559834-05:00"), treatment_id = c("453ad2a5-3155-596d-a9cc-61e35db83ce8", "d236d810-9de5-59f7-8846-31610a0dfe03"), submitter_id = c("TCGA-AA-3712_treatment", "TCGA-AA-3712_treatment_1"), treatment_type = c("Radiation Therapy, NOS", "Pharmaceutical Therapy, NOS"), state = c("release…	not reported	Descending colon	0	23831	Adenocarcinoma, NOS	no	2004	No	5th	T3	1940-03-01	N2	M0	not reported	8ac722ac-b6c7-5aa3-aa6b-4f9c8eb87500	C18.6	Descending colon	Not Reported	not reported	Not Reported	4ed40704-b21c-525a-9348-f8df61394455	not reported
TCGA-CM-6680-01A-11R-1839-07	TCGA-CM-6680	TCGA-CM-6680-01A	TP	Primary solid Tumor	TCGA-CM-6680-01A	1	Primary	badb214a-6225-4c0c-b0aa-a8b034e236ca	TCGA-CM-6680	Primary Tumor	NA	Solid Tissue	released	FALSE	Tumor	Unknown	Not Reported	NA	NA	1.2	5fb9eb48-80ca-443a-812d-41f59b9a91ef	0.5	1.5	No	Stage IIIB	0	list(treatment_intent_type = c(NA, NA), updated_datetime = c("2019-07-31T18:41:02.826547-05:00", "2019-07-31T18:41:02.826547-05:00"), treatment_id = c("29212feb-d090-5645-a307-79d9bd3ca5d9", "907f4c8b-e9c3-554a-9b81-9a7dd12a8819"), submitter_id = c("TCGA-CM-6680_treatment", "TCGA-CM-6680_treatment_1"), treatment_type = c("Radiation Therapy, NOS", "Pharmaceutical Therapy, NOS"), state = c("release…	not reported	Cecum	366	28701	Adenocarcinoma, NOS	no	2011	No	7th	T3	1940-03-01	N2a	M0	not reported	540db4e3-978b-5506-a239-e4148585e164	C18.0	Cecum	Not Reported	not reported	Not Reported	695374b1-d653-51fd-8eda-e73f86488561	white
TCGA-AA-A00D-01A-01R-A002-07	TCGA-AA-A00D	TCGA-AA-A00D-01A	TP	Primary solid Tumor	TCGA-AA-A00D-01A	1	Primary	be63c85e-73ba-436a-aa62-c318131d1d92	TCGA-AA-A00D	Primary Tumor	FALSE	Solid Tissue	released	FALSE	Tumor	Unknown	Not Reported	843	150	NA	0D0B2106-A2F1-4D5B-96CD-8E46D3A9D60B	NA	NA	No	Stage I	0	list(days_to_treatment_end = c(NA, NA), days_to_treatment_start = c(NA, NA), treatment_id = c("31d46572-4d8a-506b-808b-170564b5196c", "e98a1acb-25a3-5ade-831c-9a75fb18be8e"), submitter_id = c("TCGA-AA-A00D_treatment_1", "TCGA-AA-A00D_treatment"), treatment_type = c("Pharmaceutical Therapy, NOS", "Radiation Therapy, NOS"), regimen_or_line_of_therapy = c(NA, NA), treatment_effect = c(NA, NA), thera…	not reported	Ascending colon	578	25689	Adenocarcinoma, NOS	no	2007	No	6th	T2	1940-03-01	N0	M0	not reported	73a32a00-6352-5d6f-a45f-a48bc9873287	C18.2	Ascending colon	Not Reported	not reported	Not Reported	e42b9487-17f1-5972-a451-dd65da25ab7c	not reported
TCGA-AA-3971-01A-01R-1022-07	TCGA-AA-3971	TCGA-AA-3971-01A	TP	Primary solid Tumor	TCGA-AA-3971-01A	1	Primary	f3db9b58-d60d-41f7-a3d7-6f713272efb5	TCGA-AA-3971	Primary Tumor	NA	Solid Tissue	released	FALSE	Tumor	Unknown	Not Reported	NA	NA	0.6	c9868ee7-4cc6-4c5d-aa91-ed744a8fef35	0.4	0.6	No	Stage III	0	list(treatment_intent_type = c(NA, NA), updated_datetime = c("2019-07-31T18:23:41.844984-05:00", "2019-07-31T18:23:41.844984-05:00"), treatment_id = c("0a059c5f-f996-52d5-8c76-f0c150692cda", "ed6c3ce3-dd06-58ac-90ac-728a81cd92cd"), submitter_id = c("TCGA-AA-3971_treatment", "TCGA-AA-3971_treatment_1"), treatment_type = c("Radiation Therapy, NOS", "Pharmaceutical Therapy, NOS"), state = c("release…	not reported	Colon, NOS	489	21518	Adenocarcinoma, NOS	no	2007	No	5th	T3	1940-03-01	N1	M0	not reported	1711fb18-e219-5644-ab0f-5e673b4c7b6f	C18.9	Colon, NOS	Not Reported	not reported	Not Reported	453afe3b-1c8f-5403-8f3d-e40188f0a3e6	not reported
TCGA-AA-3861-01A-01R-1022-07	TCGA-AA-3861	TCGA-AA-3861-01A	TP	Primary solid Tumor	TCGA-AA-3861-01A	1	Primary	390070d8-ef9b-46fe-93ee-9cf01a642a92	TCGA-AA-3861	Primary Tumor	NA	Solid Tissue	released	FALSE	Tumor	Unknown	Not Reported	NA	NA	0.7	db8a3784-502f-4f08-b31b-fdf25038a65d	0.4	1	No	Stage IIA	0	list(days_to_treatment_end = c(NA, NA), days_to_treatment_start = c(NA, NA), treatment_id = c("ae97c72d-fd02-54a5-ac3f-7eaa06a42a75", "e624d2c1-3d48-5177-8245-8997ff4d9707"), submitter_id = c("TCGA-AA-3861_treatment_1", "TCGA-AA-3861_treatment"), treatment_type = c("Pharmaceutical Therapy, NOS", "Radiation Therapy, NOS"), regimen_or_line_of_therapy = c(NA, NA), treatment_effect = c(NA, NA), thera…	not reported	Cecum	914	26602	Adenocarcinoma, NOS	no	2009	No	6th	T3	1940-03-01	N0	M0	not reported	3ba9803b-07e1-5a4c-a6c2-3f9f63eb277f	C18.0	Cecum	Not Reported	not reported	Not Reported	63eb2449-6881-572c-b5fb-a9ed68e6f3db	not reported
TCGA-AZ-6599-01A-11R-1774-07	TCGA-AZ-6599	TCGA-AZ-6599-01A	TP	Primary solid Tumor	TCGA-AZ-6599-01A	1	Primary	d463f9a9-109e-40a8-8ee9-d16545b0c151	TCGA-AZ-6599	Primary Tumor	NA	Solid Tissue	released	FALSE	Tumor	Unknown	Not Reported	NA	NA	1	6ff86694-0e1f-4119-9fa2-36789c237d74	0.6	1.8	No	Stage I	0	list(treatment_intent_type = c(NA, NA), updated_datetime = c("2019-07-31T18:41:05.832319-05:00", "2019-07-31T18:41:05.832319-05:00"), treatment_id = c("71b2155f-0e03-53a3-82d7-145d4cb28690", "b00d73a9-1f10-50e4-ad87-12049b4ea591"), submitter_id = c("TCGA-AZ-6599_treatment", "TCGA-AZ-6599_treatment_1"), treatment_type = c("Radiation Therapy, NOS", "Pharmaceutical Therapy, NOS"), state = c("release…	not reported	Cecum	NA	26438	Adenocarcinoma, NOS	no	2001	No	5th	T2	1940-03-01	N0	MX	not reported	b1b1cb67-2f2b-5837-a098-557a6d0309ee	C18.0	Cecum	Not Reported	not reported	Not Reported	5f227622-cd7e-53f0-9d08-92e1a2047033	white
TCGA-3L-AA1B-01A-11R-A37K-07	TCGA-3L-AA1B	TCGA-3L-AA1B-01A	TP	Primary solid Tumor	TCGA-3L-AA1B-01A	1	Primary	22996dd0-8d03-49f2-8395-738c0599339b	TCGA-3L-AA1B	Primary Tumor	TRUE	Solid Tissue	released	FALSE	Tumor	OCT	Not Reported	35	670	NA	09A86147-EB23-489F-9849-9FDC91AC44A1	NA	NA	No	Stage I	0	list(treatment_intent_type = c(NA, NA), updated_datetime = c("2019-07-31T15:15:52.503550-05:00", "2019-07-31T15:15:52.503550-05:00"), treatment_id = c("08bfaf92-3b30-5724-ac84-dac862df44bc", "83c97fdf-1c33-5854-b543-bd33c198cbb3"), submitter_id = c("TCGA-3L-AA1B_treatment", "TCGA-3L-AA1B_treatment_1"), treatment_type = c("Radiation Therapy, NOS", "Pharmaceutical Therapy, NOS"), state = c("release…	not reported	Cecum	475	22379	Adenocarcinoma, NOS	no	2013	No	7th	T2	1940-03-01	N0	M0	not reported	6eb0d5b6-cb00-519f-838e-119b548ac582	C18.0	Cecum	Not Reported	not reported	Not Reported	44b839cb-c3d7-5a99-9dea-90b839882b9a	black or african american
TCGA-AA-3526-01A-02R-A32Z-07	TCGA-AA-3526	TCGA-AA-3526-01A	TP	Primary solid Tumor	TCGA-AA-3526-01A	1	Primary	5049aeb6-44d3-4e4a-ad30-5dc99c903039	TCGA-AA-3526	Primary Tumor	NA	Solid Tissue	released	FALSE	Tumor	Unknown	Not Reported	NA	NA	0.8	7374ce91-8d9f-4ba3-867a-e326d2298077	0.5	0.9	No	Stage I	0	list(days_to_treatment_end = c(NA, NA), days_to_treatment_start = c(NA, NA), treatment_id = c("47366cdf-eb91-5a64-bf0f-d1ca83b51ea2", "772bc6c7-106f-597d-8abb-2bd87408f9df"), submitter_id = c("TCGA-AA-3526_treatment_1", "TCGA-AA-3526_treatment"), treatment_type = c("Pharmaceutical Therapy, NOS", "Radiation Therapy, NOS"), regimen_or_line_of_therapy = c(NA, NA), treatment_effect = c(NA, NA), thera…	not reported	Sigmoid colon	580	21123	Adenocarcinoma, NOS	no	2007	No	6th	T2	1940-03-01	N0	M0	not reported	bc2b309c-0fcc-5322-9972-53d0049de1ab	C18.7	Sigmoid colon	Not Reported	not reported	Not Reported	1f5f7955-7830-5581-b6d8-f7bb3ab2524e	not reported
TCGA-AA-A01D-01A-01R-A00A-07	TCGA-AA-A01D	TCGA-AA-A01D-01A	TP	Primary solid Tumor	TCGA-AA-A01D-01A	1	Primary	082def2f-4d99-4270-83e7-5a9a5c049c23	TCGA-AA-A01D	Primary Tumor	FALSE	Solid Tissue	released	FALSE	Tumor	Unknown	Not Reported	234	360	NA	B52F7D2A-2177-4A2A-A941-042D661D3F37	NA	NA	No	Stage IIIC	0	list(days_to_treatment_end = c(NA, NA), days_to_treatment_start = c(NA, NA), treatment_id = c("b93df8ed-ee94-5a63-9815-d5db0f680b3d", "be85d18f-9596-5b38-86d5-b2b68b7be3fd"), submitter_id = c("TCGA-AA-A01D_treatment_1", "TCGA-AA-A01D_treatment"), treatment_type = c("Pharmaceutical Therapy, NOS", "Radiation Therapy, NOS"), regimen_or_line_of_therapy = c(NA, NA), treatment_effect = c(NA, NA), thera…	not reported	Rectosigmoid junction	30	17318	Mucinous adenocarcinoma	no	2009	No	6th	T3	1980-03-01	N2	M0	not reported	733d7252-78bf-5188-becb-e3a8e830a948	C19	Rectosigmoid junction	Not Reported	not reported	Not Reported	30728d71-c91e-5586-8533-0da130528a73	not reported
TCGA-A6-2678-11A-01R-A32Z-07	TCGA-A6-2678	TCGA-A6-2678-11A	NT	Solid Tissue Normal	TCGA-A6-2678-11A	11	Not Applicable	94d25554-2c1b-4646-9a93-c94e6804b6cc	TCGA-A6-2678	Solid Tissue Normal	NA	Solid Tissue	released	FALSE	Normal	Unknown	Not Reported	NA	NA	0.5	NA	0.3	0.8	No	Stage IIIB	0	list(treatment_intent_type = c(NA, NA), updated_datetime = c("2019-07-31T18:27:04.051557-05:00", "2019-07-31T18:27:04.051557-05:00"), treatment_id = c("52d132c9-7e01-5882-93a4-8e36d3809ef0", "886c4b6f-8404-5d08-b8f1-f45735168533"), submitter_id = c("TCGA-A6-2678_treatment", "TCGA-A6-2678_treatment_1"), treatment_type = c("Radiation Therapy, NOS", "Pharmaceutical Therapy, NOS"), state = c("release…	not reported	Transverse colon	1286	16030	Adenocarcinoma, NOS	no	2009	No	6th	T3	1940-03-01	N1	M0	not reported	ccbdd2e1-7c04-5f88-a535-3883a1558658	C18.4	Transverse colon	Not Reported	not reported	Not Reported	f7f290b8-7aa4-53d0-9e29-b60237b3f9a4	white
TCGA-CA-5256-01A-01R-1410-07	TCGA-CA-5256	TCGA-CA-5256-01A	TP	Primary solid Tumor	TCGA-CA-5256-01A	1	Primary	d4d5deb6-6cfb-4e25-9824-8f7dc8d5b451	TCGA-CA-5256	Primary Tumor	NA	Solid Tissue	released	FALSE	Tumor	Unknown	Not Reported	NA	NA	1	88b57491-1b29-40e0-bb15-95adbb9aef9c	0.5	1.2	No	Stage IIA	0	list(treatment_intent_type = c(NA, NA), updated_datetime = c("2019-07-31T18:24:19.228828-05:00", "2019-07-31T18:24:19.228828-05:00"), treatment_id = c("16fb0269-ca0e-570e-9b7d-f2c73aacdcb1", "d8b5593a-473e-524e-812f-f2144a53e5f6"), submitter_id = c("TCGA-CA-5256_treatment", "TCGA-CA-5256_treatment_1"), treatment_type = c("Radiation Therapy, NOS", "Pharmaceutical Therapy, NOS"), state = c("release…	not reported	Colon, NOS	379	19785	Adenocarcinoma, NOS	no	2010	No	NA	T3	1940-03-01	N0	M0	not reported	d8ae5b86-0710-5358-a855-bfb4ad26a56d	C18.9	Colon, NOS	Not Reported	not reported	Not Reported	42da2db5-2f9c-5feb-8273-017b84feac3d	asian
TCGA-D5-6920-01A-11R-1928-07	TCGA-D5-6920	TCGA-D5-6920-01A	TP	Primary solid Tumor	TCGA-D5-6920-01A	1	Primary	bde9ee05-b6c2-49c7-a1d4-7fa823a087d9	TCGA-D5-6920	Primary Tumor	NA	Solid Tissue	released	FALSE	Tumor	Unknown	Not Reported	NA	NA	0.7	785f1166-6b98-497a-9546-75ce66337309	0.6	1.5	No	Stage IIA	0	list(days_to_treatment_end = c(NA, NA), days_to_treatment_start = c(NA, NA), treatment_id = c("c4181451-cc56-5d08-bc5f-c397133be071", "dda9b778-e481-59e4-8001-de8316fc0e95"), submitter_id = c("TCGA-D5-6920_treatment_1", "TCGA-D5-6920_treatment"), treatment_type = c("Pharmaceutical Therapy, NOS", "Radiation Therapy, NOS"), regimen_or_line_of_therapy = c(NA, NA), treatment_effect = c(NA, NA), thera…	not reported	Sigmoid colon	377	28124	Adenocarcinoma, NOS	no	2011	No	7th	T3	1940-03-01	N0	M0	not reported	67137dc1-edb6-5a1b-91a8-c009c86752de	C18.7	Sigmoid colon	Not Reported	not reported	Not Reported	9053b2c5-b4f5-57b1-8853-f19625d8aa64	white
TCGA-DM-A0XF-01A-11R-A155-07	TCGA-DM-A0XF	TCGA-DM-A0XF-01A	TP	Primary solid Tumor	TCGA-DM-A0XF-01A	1	Primary	8f80047b-a700-413c-b228-6d170648e168	TCGA-DM-A0XF	Primary Tumor	FALSE	Solid Tissue	released	FALSE	Tumor	Unknown	Not Reported	4089	140	NA	2E442714-A485-48C1-80FD-9418ABD94D9C	NA	NA	No	Stage IIIC	0	list(treatment_intent_type = c(NA, NA), updated_datetime = c("2019-07-31T18:35:23.614711-05:00", "2019-07-31T18:35:23.614711-05:00"), treatment_id = c("0dcc39d4-34c8-57a9-a176-10aa781cce79", "67186e68-c4c7-5f58-b353-4281cba71754"), submitter_id = c("TCGA-DM-A0XF_treatment", "TCGA-DM-A0XF_treatment_1"), treatment_type = c("Radiation Therapy, NOS", "Pharmaceutical Therapy, NOS"), state = c("release…	not reported	Sigmoid colon	NA	25032	Adenocarcinoma, NOS	no	1999	No	NA	T3	1940-03-01	N2	M0	not reported	c1d318fc-aa50-5d72-8e89-7d7829c89012	C18.7	Sigmoid colon	Not Reported	not reported	Not Reported	e8e7e4e6-69c2-5e23-ad57-a13b9b3e9339	white
TCGA-QG-A5Z1-01A-11R-A28H-07	TCGA-QG-A5Z1	TCGA-QG-A5Z1-01A	TP	Primary solid Tumor	TCGA-QG-A5Z1-01A	1	Primary	95601410-9608-4dda-ba3f-462be0e8c35f	TCGA-QG-A5Z1	Primary Tumor	TRUE	Solid Tissue	released	FALSE	Tumor	OCT	Not Reported	516	190	NA	63266BCF-52D2-4EFC-ADD4-B7728BD8101E	NA	NA	No	Stage IIIB	0	list(days_to_treatment_end = c(NA, NA), days_to_treatment_start = c(NA, NA), treatment_id = c("210dda41-6be6-5ec4-9748-56fc6a2a7d6e", "c3f040e4-9b82-5dce-8863-658f3543dc03"), submitter_id = c("TCGA-QG-A5Z1_treatment_1", "TCGA-QG-A5Z1_treatment"), treatment_type = c("Pharmaceutical Therapy, NOS", "Radiation Therapy, NOS"), regimen_or_line_of_therapy = c(NA, NA), treatment_effect = c(NA, NA), thera…	not reported	Rectosigmoid junction	202	26220	Adenocarcinoma, NOS	no	2011	No	7th	T3	1940-03-01	N1b	MX	not reported	f34a7fe5-294f-51f9-9340-9813a2b67492	C19	Rectosigmoid junction	Not Reported	not reported	Not Reported	bae5f8c5-438c-56a9-b0e7-5dc8bd82fd52	black or african american
TCGA-A6-6782-01A-11R-1839-07	TCGA-A6-6782	TCGA-A6-6782-01A	TP	Primary solid Tumor	TCGA-A6-6782-01A	1	Primary	844a005f-471c-45d5-86de-956951d6b7d1	TCGA-A6-6782	Primary Tumor	NA	Solid Tissue	released	FALSE	Tumor	Unknown	Not Reported	NA	NA	0.9	415fc4f9-7e7d-4ad1-ad08-8fd462ebb39a	0.9	1.7	No	Stage IIB	0	list(days_to_treatment_end = c(NA, NA), days_to_treatment_start = c(NA, NA), treatment_id = c("62d941ea-58a6-58b1-a627-48f8a67812f0", "95de20f7-d69f-5f3a-8196-2de0ebc385fc"), submitter_id = c("TCGA-A6-6782_treatment_1", "TCGA-A6-6782_treatment"), treatment_type = c("Pharmaceutical Therapy, NOS", "Radiation Therapy, NOS"), regimen_or_line_of_therapy = c(NA, NA), treatment_effect = c(NA, NA), thera…	not reported	Ascending colon	617	30012	Adenocarcinoma, NOS	no	2011	No	7th	T4a	1940-03-01	N0	MX	not reported	f4335285-6749-56b7-9ecf-127b95b651a9	C18.2	Ascending colon	Not Reported	not reported	Not Reported	9d521ac7-ec33-5d7b-8d00-c845253501e4	white
TCGA-AA-3544-01A-01R-1873-07	TCGA-AA-3544	TCGA-AA-3544-01A	TP	Primary solid Tumor	TCGA-AA-3544-01A	1	Primary	3e51f010-457d-465e-b7b3-7f65761cd28c	TCGA-AA-3544	Primary Tumor	NA	Solid Tissue	released	FALSE	Tumor	Unknown	Not Reported	NA	NA	0.6	93ea637f-9ccb-4b49-bc45-e7e5388143f4	0.2	0.9	No	Stage I	0	list(treatment_intent_type = c(NA, NA), updated_datetime = c("2019-07-31T18:39:40.543596-05:00", "2019-07-31T18:39:40.543596-05:00"), treatment_id = c("39b643b7-b379-5bf9-b521-fda3dc823909", "980d3c68-da7b-5f92-93b6-93b243b3b797"), submitter_id = c("TCGA-AA-3544_treatment", "TCGA-AA-3544_treatment_1"), treatment_type = c("Radiation Therapy, NOS", "Pharmaceutical Therapy, NOS"), state = c("release…	not reported	Colon, NOS	426	24959	Adenocarcinoma, NOS	no	2008	No	6th	T2	1940-03-01	N0	M0	not reported	7c882d37-d518-57b5-b061-61806aef5b6f	C18.9	Colon, NOS	Not Reported	not reported	Not Reported	5aa00a9e-58b2-5956-9236-305885eb1633	not reported
TCGA-AA-A022-01A-21R-A16W-07	TCGA-AA-A022	TCGA-AA-A022-01A	TP	Primary solid Tumor	TCGA-AA-A022-01A	1	Primary	9ef79e62-54d7-406b-9a15-893b2871929f	TCGA-AA-A022	Primary Tumor	FALSE	Solid Tissue	released	FALSE	Tumor	Unknown	Not Reported	1573	320	NA	E01892F7-39B5-4EC3-B8B7-733B5301AC50	NA	NA	No	Stage II	0	list(treatment_intent_type = c(NA, NA), updated_datetime = c("2019-07-31T15:21:04.951807-05:00", "2019-07-31T15:21:04.951807-05:00"), treatment_id = c("8b681403-6c4e-5978-95a9-73ca979ea8a6", "fca6254d-530e-5718-a89c-61caab1a70c7"), submitter_id = c("TCGA-AA-A022_treatment", "TCGA-AA-A022_treatment_1"), treatment_type = c("Radiation Therapy, NOS", "Pharmaceutical Therapy, NOS"), state = c("release…	not reported	Cecum	0	32446	Adenocarcinoma, NOS	no	2005	No	5th	T4	1940-03-01	N0	M0	not reported	a816f46f-85d6-5ae3-8d2f-737fcdfad5b8	C18.0	Cecum	Not Reported	not reported	Not Reported	cd392da6-a9e6-58f8-a966-8774fe391db6	not reported
TCGA-AA-3850-01A-01R-1022-07	TCGA-AA-3850	TCGA-AA-3850-01A	TP	Primary solid Tumor	TCGA-AA-3850-01A	1	Primary	573ce44a-ee08-4f10-8b97-35cd0454ddc7	TCGA-AA-3850	Primary Tumor	NA	Solid Tissue	released	FALSE	Tumor	Unknown	Not Reported	NA	NA	0.7	4b03559c-8668-46b0-9611-063d346fd54c	0.5	1.6	No	Stage I	0	list(days_to_treatment_end = c(NA, NA), days_to_treatment_start = c(NA, NA), treatment_id = c("0d467c7f-aea1-50cb-a713-00f0489ea2b8", "a5ba37f0-45c5-5041-bd94-1226906a8120"), submitter_id = c("TCGA-AA-3850_treatment_1", "TCGA-AA-3850_treatment"), treatment_type = c("Pharmaceutical Therapy, NOS", "Radiation Therapy, NOS"), regimen_or_line_of_therapy = c(NA, NA), treatment_effect = c(NA, NA), thera…	not reported	Transverse colon	NA	27090	Adenocarcinoma, NOS	no	2009	No	6th	T2	1940-03-01	N0	M0	not reported	757da2c2-3791-5a86-be8a-8f3c670fae93	C18.4	Transverse colon	Not Reported	not reported	Not Reported	28dab990-a28c-5efd-b44a-0b81d11d3805	not reported
TCGA-AA-3975-01A-01R-1022-07	TCGA-AA-3975	TCGA-AA-3975-01A	TP	Primary solid Tumor	TCGA-AA-3975-01A	1	Primary	47839ff7-7da3-4160-bf1f-d8516a34bbe5	TCGA-AA-3975	Primary Tumor	NA	Solid Tissue	released	FALSE	Tumor	Unknown	Not Reported	NA	NA	0.6	2ea60aab-1f16-4dd6-9f73-39103a726d83	0.5	1	No	Stage I	0	list(treatment_intent_type = c(NA, NA), updated_datetime = c("2019-07-31T18:34:08.384120-05:00", "2019-07-31T18:34:08.384120-05:00"), treatment_id = c("3e8dbb5f-0f97-5248-8e87-d4a58ee21eb0", "f7e1fc36-d51a-5ab7-be15-b45c1a750d33"), submitter_id = c("TCGA-AA-3975_treatment", "TCGA-AA-3975_treatment_1"), treatment_type = c("Radiation Therapy, NOS", "Pharmaceutical Therapy, NOS"), state = c("release…	not reported	Colon, NOS	1036	29310	Adenocarcinoma, NOS	no	2009	No	6th	T2	1940-03-01	N0	M0	not reported	ca3b040b-f890-5bab-8628-0b38d15b7ce8	C18.9	Colon, NOS	Not Reported	not reported	Not Reported	2b7496c8-805e-5fa7-a9ae-1eb64a8dc050	not reported
TCGA-AA-3529-01A-02R-0821-07	TCGA-AA-3529	TCGA-AA-3529-01A	TP	Primary solid Tumor	TCGA-AA-3529-01A	1	Primary	b083e3cb-0af1-44ea-854d-85fd99b75ad5	TCGA-AA-3529	Primary Tumor	NA	Solid Tissue	released	FALSE	Tumor	Unknown	Not Reported	NA	NA	0.6	5489c71b-45a8-4172-a5f7-4da23d721b98	0.5	1	No	Stage IIIC	0	list(days_to_treatment_end = c(NA, NA), days_to_treatment_start = c(NA, NA), treatment_id = c("69dd186b-2c44-5e9c-8d8e-82342fb05c31", "f04aaef4-2486-526b-97a7-fa332423032e"), submitter_id = c("TCGA-AA-3529_treatment_1", "TCGA-AA-3529_treatment"), treatment_type = c("Pharmaceutical Therapy, NOS", "Radiation Therapy, NOS"), regimen_or_line_of_therapy = c(NA, NA), treatment_effect = c(NA, NA), thera…	not reported	Sigmoid colon	NA	28609	Adenocarcinoma, NOS	no	2007	No	6th	T3	1940-03-01	N2	M0	not reported	7c3c1f6a-6f55-55e5-becf-95381d49b5ec	C18.7	Sigmoid colon	Not Reported	not reported	Not Reported	0a8b59b1-94cb-5332-9849-d61f48df0cc1	not reported
TCGA-AA-3695-01A-01R-0905-07	TCGA-AA-3695	TCGA-AA-3695-01A	TP	Primary solid Tumor	TCGA-AA-3695-01A	1	Primary	1fddbfcc-b6a4-4f7c-aa5c-ce1e170e21bd	TCGA-AA-3695	Primary Tumor	NA	Solid Tissue	released	FALSE	Tumor	Unknown	Not Reported	NA	NA	0.6	2589f145-0f8d-4c7c-bdb8-a2c1843d1548	0.5	1.3	No	Stage IV	0	list(treatment_intent_type = c(NA, NA), updated_datetime = c("2019-07-31T18:25:02.792478-05:00", "2019-07-31T18:25:02.792478-05:00"), treatment_id = c("2839fc8c-2403-5f54-9e58-a8aacaf5b67f", "56ba9f11-e187-5a7d-9f4f-66be2d352615"), submitter_id = c("TCGA-AA-3695_treatment", "TCGA-AA-3695_treatment_1"), treatment_type = c("Radiation Therapy, NOS", "Pharmaceutical Therapy, NOS"), state = c("release…	not reported	Cecum	0	23164	Adenocarcinoma, NOS	no	2009	No	6th	T3	1940-03-01	N2	M1	not reported	f5b507ce-101a-558b-a4a2-e15d51b9fe31	C18.0	Cecum	Not Reported	not reported	Not Reported	a8f822ad-b2b3-5db6-aa25-81241438606b	not reported
TCGA-DM-A1D8-01A-11R-A155-07	TCGA-DM-A1D8	TCGA-DM-A1D8-01A	TP	Primary solid Tumor	TCGA-DM-A1D8-01A	1	Primary	f7c33a3a-f7e2-4827-97ea-b0a2921dec08	TCGA-DM-A1D8	Primary Tumor	FALSE	Solid Tissue	released	FALSE	Tumor	Unknown	Not Reported	3937	180	NA	F078AE22-06A2-45CA-A82E-71F7AEFD0312	NA	NA	No	NA	0	list(days_to_treatment_end = c(NA, NA), days_to_treatment_start = c(NA, NA), treatment_id = c("52bdd7ac-9c6d-5f76-a78a-b53da10c94b0", "9c5d82e4-e1dd-5935-95e7-9577b97e7027"), submitter_id = c("TCGA-DM-A1D8_treatment_1", "TCGA-DM-A1D8_treatment"), treatment_type = c("Pharmaceutical Therapy, NOS", "Radiation Therapy, NOS"), regimen_or_line_of_therapy = c(NA, NA), treatment_effect = c(NA, NA), thera…	not reported	Ascending colon	383	18311	Adenocarcinoma, NOS	no	2000	No	NA	T3	1940-03-01	N1	NA	not reported	5836d9ce-200b-594e-8a4f-1614e251b714	C18.2	Ascending colon	Not Reported	not reported	Not Reported	c12d2a9a-81da-5790-8263-9a89f1e9fd4f	white
TCGA-AA-3693-01A-01R-0905-07	TCGA-AA-3693	TCGA-AA-3693-01A	TP	Primary solid Tumor	TCGA-AA-3693-01A	1	Primary	e2843875-a4de-4d90-bda2-0fbbc929757f	TCGA-AA-3693	Primary Tumor	NA	Solid Tissue	released	FALSE	Tumor	Unknown	Not Reported	NA	NA	0.5	1d5ed0e0-fe91-4027-ba7a-a07e55c7796c	0.3	0.8	No	Stage IV	0	list(treatment_intent_type = c(NA, NA), updated_datetime = c("2019-07-31T18:26:28.359620-05:00", "2019-07-31T18:26:28.359620-05:00"), treatment_id = c("10499732-829a-558a-82cc-a309ee09d766", "75cb9175-ccae-5a12-96eb-9b06dc74a58d"), submitter_id = c("TCGA-AA-3693_treatment", "TCGA-AA-3693_treatment_1"), treatment_type = c("Radiation Therapy, NOS", "Pharmaceutical Therapy, NOS"), state = c("release…	not reported	Sigmoid colon	0	28459	Adenocarcinoma, NOS	no	2008	No	6th	T4	1940-03-01	N1	M1	not reported	74806ea0-7178-5698-90ad-2ccbc503c97c	C18.7	Sigmoid colon	Not Reported	not reported	Not Reported	b6f2cc12-a02b-52cc-bc14-e25fa0b2555a	not reported
TCGA-A6-6138-01A-11R-1774-07	TCGA-A6-6138	TCGA-A6-6138-01A	TP	Primary solid Tumor	TCGA-A6-6138-01A	1	Primary	4410c7ed-286b-4452-bf3e-782673177b97	TCGA-A6-6138	Primary Tumor	NA	Solid Tissue	released	FALSE	Tumor	Unknown	Not Reported	NA	NA	0.8	270ff9cd-8154-4fab-b2b5-01e9ace89200	0.4	1	No	Stage I	0	list(treatment_intent_type = c(NA, NA), updated_datetime = c("2019-07-31T18:27:59.292987-05:00", "2019-07-31T18:27:59.292987-05:00"), treatment_id = c("777e3164-730e-5586-8cd0-2dd48cb9e836", "96871400-afc9-54b3-82bf-f537c41f8b04"), submitter_id = c("TCGA-A6-6138_treatment", "TCGA-A6-6138_treatment_1"), treatment_type = c("Radiation Therapy, NOS", "Pharmaceutical Therapy, NOS"), state = c("release…	not reported	Cecum	685	22523	Adenocarcinoma, NOS	no	2010	No	NA	T2	1940-03-01	N0	M0	not reported	1263e084-7d11-5a43-8c6d-de6ce266ae62	C18.0	Cecum	Not Reported	not reported	Not Reported	12ae1c72-766f-52e1-8068-6ca6bd999135	white
TCGA-AA-A00U-01A-01R-A002-07	TCGA-AA-A00U	TCGA-AA-A00U-01A	TP	Primary solid Tumor	TCGA-AA-A00U-01A	1	Primary	2fc854d7-4f80-4c39-bd92-397e94fee4a0	TCGA-AA-A00U	Primary Tumor	FALSE	Solid Tissue	released	FALSE	Tumor	Unknown	Not Reported	326	160	NA	670DA42C-A894-45FC-9785-17BB52AE81F7	NA	NA	No	Stage IIIB	0	list(treatment_intent_type = c(NA, NA), updated_datetime = c("2019-07-31T18:22:48.709240-05:00", "2019-07-31T18:22:48.709240-05:00"), treatment_id = c("64ba0ac7-b43f-58fb-8215-21b7d9b4ffaf", "c34189b3-e64d-57af-926b-3d7e6891a260"), submitter_id = c("TCGA-AA-A00U_treatment", "TCGA-AA-A00U_treatment_1"), treatment_type = c("Radiation Therapy, NOS", "Pharmaceutical Therapy, NOS"), state = c("release…	not reported	Ascending colon	518	18263	Adenocarcinoma, NOS	no	2009	No	6th	T3	1940-03-01	N1	M0	not reported	faf63d6a-860f-5354-9088-7426f1aac751	C18.2	Ascending colon	Not Reported	not reported	Not Reported	a0c121b0-1c4e-5303-a918-ca7886dbf452	not reported
TCGA-AA-3984-01A-02R-1022-07	TCGA-AA-3984	TCGA-AA-3984-01A	TP	Primary solid Tumor	TCGA-AA-3984-01A	1	Primary	5dfdd1a3-8eee-4057-a850-ad01eccba02a	TCGA-AA-3984	Primary Tumor	NA	Solid Tissue	released	FALSE	Tumor	Unknown	Not Reported	NA	NA	0.6	a1027d0e-bf96-45b2-a762-e71f3a5563dd	0.4	1	No	Stage IIA	0	list(days_to_treatment_end = c(NA, NA), days_to_treatment_start = c(NA, NA), treatment_id = c("a2325983-d0fd-5843-aa77-81580958f622", "b17eedc0-dd91-5d99-abd8-42c5a1e9acb0"), submitter_id = c("TCGA-AA-3984_treatment_1", "TCGA-AA-3984_treatment"), treatment_type = c("Pharmaceutical Therapy, NOS", "Radiation Therapy, NOS"), regimen_or_line_of_therapy = c(NA, NA), treatment_effect = c(NA, NA), thera…	not reported	Sigmoid colon	0	22585	Adenocarcinoma, NOS	no	2009	No	6th	T3	1940-03-01	N0	M0	not reported	8ca947bf-1e8b-559c-859c-bf9e24a736e0	C18.7	Sigmoid colon	Not Reported	not reported	Not Reported	a94eef20-f496-5244-9c77-946d9797cc8c	not reported
TCGA-CM-6169-01A-11R-1653-07	TCGA-CM-6169	TCGA-CM-6169-01A	TP	Primary solid Tumor	TCGA-CM-6169-01A	1	Primary	c1a72c32-2588-4d38-a634-ed1868dc9969	TCGA-CM-6169	Primary Tumor	NA	Solid Tissue	released	FALSE	Tumor	Unknown	Not Reported	NA	NA	0.6	94244f00-1696-46e7-88af-d316a5c238fb	0.6	1.4	No	Stage IIA	0	list(treatment_intent_type = c(NA, NA), updated_datetime = c("2019-07-31T18:32:24.762331-05:00", "2019-07-31T18:32:24.762331-05:00"), treatment_id = c("2041500f-414f-503b-9124-1aabafa9b457", "e9ef24ad-5a60-5180-ac44-666707c7a485"), submitter_id = c("TCGA-CM-6169_treatment", "TCGA-CM-6169_treatment_1"), treatment_type = c("Radiation Therapy, NOS", "Pharmaceutical Therapy, NOS"), state = c("release…	not reported	Cecum	396	24564	Adenocarcinoma, NOS	no	2010	No	7th	T3	1940-03-01	N0	M0	not reported	df7cf2b4-45d8-5d59-b398-5732ca66ff0c	C18.0	Cecum	Not Reported	not reported	Not Reported	eb8273fa-4a4a-538d-b2c5-9eb9a3a70fbb	black or african american
TCGA-DM-A28H-01A-11R-A16W-07	TCGA-DM-A28H	TCGA-DM-A28H-01A	TP	Primary solid Tumor	TCGA-DM-A28H-01A	1	Primary	9493c0b9-d2b3-4163-8a4e-ac9deb127045	TCGA-DM-A28H	Primary Tumor	FALSE	Solid Tissue	released	FALSE	Tumor	Unknown	Not Reported	3363	80	NA	9DA1FAC8-4D16-4F59-A283-6E5093034816	NA	NA	No	Stage IIIC	0	list(days_to_treatment_end = c(NA, NA), days_to_treatment_start = c(NA, NA), treatment_id = c("60cb678a-fe88-5480-bed6-6e3de405bf9a", "c9b43bb8-9a4a-52e7-8d18-9ccbdcbe064e"), submitter_id = c("TCGA-DM-A28H_treatment_1", "TCGA-DM-A28H_treatment"), treatment_type = c("Pharmaceutical Therapy, NOS", "Radiation Therapy, NOS"), regimen_or_line_of_therapy = c(NA, NA), treatment_effect = c(NA, NA), thera…	not reported	Cecum	3561	18325	Adenocarcinoma, NOS	no	2002	No	6th	T3	1940-03-01	N2	M0	not reported	28aa3ee1-6072-5863-953e-27c7f5c2606a	C18.0	Cecum	Not Reported	not reported	Not Reported	a72c3f4f-7db7-5e2f-902f-9b13922af798	white
TCGA-AA-A00Q-01A-01R-A002-07	TCGA-AA-A00Q	TCGA-AA-A00Q-01A	TP	Primary solid Tumor	TCGA-AA-A00Q-01A	1	Primary	89fc5db9-edff-480f-8fc4-addd28c6d615	TCGA-AA-A00Q	Primary Tumor	FALSE	Solid Tissue	released	FALSE	Tumor	Unknown	Not Reported	599	250	NA	7F67E829-D10E-4B47-B0A1-6029B57ED112	NA	NA	No	Stage IIIB	0	list(days_to_treatment_end = c(NA, NA), days_to_treatment_start = c(NA, NA), treatment_id = c("4f2e18a9-8951-5902-a510-01191e47f3fc", "59386e60-f97a-570b-b76b-54a98a04c1f2"), submitter_id = c("TCGA-AA-A00Q_treatment_1", "TCGA-AA-A00Q_treatment"), treatment_type = c("Pharmaceutical Therapy, NOS", "Radiation Therapy, NOS"), regimen_or_line_of_therapy = c(NA, NA), treatment_effect = c(NA, NA), thera…	not reported	Sigmoid colon	1278	24199	Adenocarcinoma, NOS	no	2008	No	6th	T4	1940-03-01	N1	M0	not reported	aff4f604-fbee-507c-b299-03279bb4998b	C18.7	Sigmoid colon	Not Reported	not reported	Not Reported	74948bc8-0ba1-5be7-bbd1-7342ef102f63	not reported
TCGA-AA-A01S-01A-21R-A083-07	TCGA-AA-A01S	TCGA-AA-A01S-01A	TP	Primary solid Tumor	TCGA-AA-A01S-01A	1	Primary	5743700c-cbd3-4f87-8109-6349a96eb605	TCGA-AA-A01S	Primary Tumor	FALSE	Solid Tissue	released	FALSE	Tumor	Unknown	Not Reported	2152	680	NA	5A447FA7-E561-4F17-9A66-0CF944B2D8C3	NA	NA	No	Stage III	0	list(treatment_intent_type = c(NA, NA), updated_datetime = c("2019-07-31T15:20:24.323194-05:00", "2019-07-31T15:20:24.323194-05:00"), treatment_id = c("0d6a161c-8e10-5588-b3f6-29302048ce5f", "a0677cbf-f43c-5198-a0d7-bce30b93d99a"), submitter_id = c("TCGA-AA-A01S_treatment", "TCGA-AA-A01S_treatment_1"), treatment_type = c("Radiation Therapy, NOS", "Pharmaceutical Therapy, NOS"), state = c("release…	not reported	Sigmoid colon	31	17257	Adenocarcinoma, NOS	no	2004	No	5th	T3	1940-03-01	N1	M0	not reported	ad341620-4e22-5379-a522-c2bf92543836	C18.7	Sigmoid colon	Not Reported	not reported	Not Reported	d029d48b-7797-557d-8aad-01917b46e889	not reported
TCGA-CA-6718-01A-11R-1839-07	TCGA-CA-6718	TCGA-CA-6718-01A	TP	Primary solid Tumor	TCGA-CA-6718-01A	1	Primary	f235afbb-dc2a-41dd-b373-77c0aacefb37	TCGA-CA-6718	Primary Tumor	NA	Solid Tissue	released	FALSE	Tumor	Unknown	Not Reported	NA	NA	1.4	2693ae88-e1f4-4855-84fb-4e71ec58150e	0.5	1.7	No	Stage IIA	0	list(treatment_intent_type = c(NA, NA), updated_datetime = c("2019-07-31T18:38:53.448363-05:00", "2019-07-31T18:38:53.448363-05:00"), treatment_id = c("30e47192-4ab4-5394-9e41-accc4da1f991", "e5d15c0c-e479-5a46-8fad-8e21da01230f"), submitter_id = c("TCGA-CA-6718_treatment", "TCGA-CA-6718_treatment_1"), treatment_type = c("Radiation Therapy, NOS", "Pharmaceutical Therapy, NOS"), state = c("release…	not reported	Colon, NOS	3	17109	Adenocarcinoma, NOS	no	2010	No	6th	T3	1940-03-01	N0	M0	not reported	0139fa7d-5570-579e-ba13-55f1ab069119	C18.9	Colon, NOS	Not Reported	not reported	Not Reported	5bfdab6b-4466-5c22-9a29-a92a6cab72fc	asian
TCGA-CM-6674-01A-11R-1839-07	TCGA-CM-6674	TCGA-CM-6674-01A	TP	Primary solid Tumor	TCGA-CM-6674-01A	1	Primary	18c55689-4c2e-4592-867a-d7e0ba752ed7	TCGA-CM-6674	Primary Tumor	NA	Solid Tissue	released	FALSE	Tumor	Unknown	Not Reported	NA	NA	1	c889d318-6874-467a-ae2b-489622f32c7a	0.4	1.3	No	Stage IIA	0	list(treatment_intent_type = c(NA, NA), updated_datetime = c("2019-07-31T18:28:28.526079-05:00", "2019-07-31T18:28:28.526079-05:00"), treatment_id = c("5b917298-9c92-549b-bda3-1d1e2946bb4f", "d0c0d2dc-c9dc-5f37-ad4c-f2efc25a79ae"), submitter_id = c("TCGA-CM-6674_treatment", "TCGA-CM-6674_treatment_1"), treatment_type = c("Radiation Therapy, NOS", "Pharmaceutical Therapy, NOS"), state = c("release…	not reported	Hepatic flexure of colon	394	14368	Adenocarcinoma, NOS	no	2011	No	7th	T3	1940-03-01	N0	M0	not reported	1052f0f0-679d-58f6-a30e-fdb3cb2c44ea	C18.3	Hepatic flexure of colon	Not Reported	not reported	Not Reported	5f204224-c02f-5a3f-b283-dd01544b4ea4	white
TCGA-A6-5665-01A-01R-1653-07	TCGA-A6-5665	TCGA-A6-5665-01A	TP	Primary solid Tumor	TCGA-A6-5665-01A	1	Primary	4582b393-8635-4b82-871b-1fa117abfece	TCGA-A6-5665	Primary Tumor	NA	Solid Tissue	released	FALSE	Tumor	Unknown	Not Reported	NA	NA	0.8	814c8056-1298-4941-9fde-c660dae23c0e	0.6	2	No	Stage IIA	0	list(days_to_treatment_end = c(NA, NA), days_to_treatment_start = c(NA, NA), treatment_id = c("26744759-4778-5baa-b97d-87f1cc418475", "e21825af-c3b3-5f46-a33f-c25ebe0864b2"), submitter_id = c("TCGA-A6-5665_treatment_1", "TCGA-A6-5665_treatment"), treatment_type = c("Pharmaceutical Therapy, NOS", "Radiation Therapy, NOS"), regimen_or_line_of_therapy = c(NA, NA), treatment_effect = c(NA, NA), thera…	not reported	Ascending colon	671	30915	Adenocarcinoma, NOS	no	2010	No	7th	T3	1940-03-01	N0	M0	not reported	8b065860-5850-5e13-9d3c-930da451c3bb	C18.2	Ascending colon	Not Reported	not reported	Not Reported	543de9e3-21d0-5beb-b2b2-383d1b1bd23a	white
TCGA-G4-6304-01A-11R-1928-07	TCGA-G4-6304	TCGA-G4-6304-01A	TP	Primary solid Tumor	TCGA-G4-6304-01A	1	Primary	a67c65a3-f80d-4532-9a32-20b2fecadb93	TCGA-G4-6304	Primary Tumor	NA	Solid Tissue	released	FALSE	Tumor	Unknown	Not Reported	NA	NA	1	0e039ee7-40eb-4b0f-9a26-462f68940e85	0.4	1.5	No	Stage IIB	0	list(days_to_treatment_end = c(NA, NA), days_to_treatment_start = c(NA, NA), treatment_id = c("ab57b61f-2f3e-54fa-84b5-60e7bd3a5ae0", "d2c89e7b-599a-5007-be56-62179899b451"), submitter_id = c("TCGA-G4-6304_treatment_1", "TCGA-G4-6304_treatment"), treatment_type = c("Pharmaceutical Therapy, NOS", "Radiation Therapy, NOS"), regimen_or_line_of_therapy = c(NA, NA), treatment_effect = c(NA, NA), thera…	not reported	Transverse colon	1631	24172	Adenocarcinoma, NOS	no	2006	No	6th	T4	1940-03-01	N0	M0	not reported	da9d349f-ad6f-5705-847e-a01db4c303ef	C18.4	Transverse colon	Not Reported	not reported	Not Reported	747fe7c5-3564-543d-b81f-325eb0497762	white
TCGA-A6-3807-01A-01R-1022-07	TCGA-A6-3807	TCGA-A6-3807-01A	TP	Primary solid Tumor	TCGA-A6-3807-01A	1	Primary	1eb2a255-6edd-4adb-b52d-99dcec590c5d	TCGA-A6-3807	Primary Tumor	NA	Solid Tissue	released	FALSE	Tumor	Unknown	Not Reported	NA	NA	0.8	64b62c44-5f24-49db-bc69-f6fab36044a2	0.6	0.8	No	Stage IIIC	0	list(days_to_treatment_end = c(NA, NA), days_to_treatment_start = c(NA, NA), treatment_id = c("2195d4e0-9b52-52a6-a10c-6547940c9136", "274647a5-d0dc-5125-90c8-e5783b2ff4d1"), submitter_id = c("TCGA-A6-3807_treatment_1", "TCGA-A6-3807_treatment"), treatment_type = c("Pharmaceutical Therapy, NOS", "Radiation Therapy, NOS"), regimen_or_line_of_therapy = c(NA, NA), treatment_effect = c(NA, NA), thera…	not reported	Sigmoid colon	1054	19624	Adenocarcinoma, NOS	no	2009	No	NA	T3	1940-03-01	N2	M0	not reported	99cb6c71-bd5a-5fa1-9727-52a5949fa87e	C18.7	Sigmoid colon	Not Reported	not reported	Not Reported	e2300eac-edc2-5d02-83ae-8ef3ccce81c5	white
TCGA-A6-3810-01A-01R-A278-07	TCGA-A6-3810	TCGA-A6-3810-01A	TP	Primary solid Tumor	TCGA-A6-3810-01A	1	Primary	f2bd44d3-a53c-4a10-9ae1-a93e762f174c	TCGA-A6-3810	Primary Tumor	NA	Solid Tissue	released	FALSE	Tumor	Unknown	Not Reported	NA	NA	1	d45c776b-26a5-406a-a4fe-f90896646611	0.5	2.2	No	Stage IIA	0	list(treatment_intent_type = c(NA, NA), updated_datetime = c("2019-07-31T15:15:04.148193-05:00", "2019-07-31T15:15:04.148193-05:00"), treatment_id = c("8e1c3e76-7ca5-5e10-a8ac-9d9f7b165d61", "c433e194-a1ce-5ef9-a4d5-1ef334d23435"), submitter_id = c("TCGA-A6-3810_treatment", "TCGA-A6-3810_treatment_1"), treatment_type = c("Radiation Therapy, NOS", "Pharmaceutical Therapy, NOS"), state = c("release…	not reported	Colon, NOS	1111	22999	Adenocarcinoma, NOS	no	2009	No	NA	T3	1940-03-01	N0	M0	not reported	6686205a-ba93-5e31-b2d6-4be973d595ee	C18.9	Colon, NOS	Not Reported	not reported	Not Reported	4085545c-fa8b-5dda-b425-07ca17e1edb5	white
TCGA-AA-3837-01A-01R-0905-07	TCGA-AA-3837	TCGA-AA-3837-01A	TP	Primary solid Tumor	TCGA-AA-3837-01A	1	Primary	806186aa-fe7d-448a-9f59-c7acbe044621	TCGA-AA-3837	Primary Tumor	NA	Solid Tissue	released	FALSE	Tumor	Unknown	Not Reported	NA	NA	0.7	45d68348-26b2-4a0a-af72-c741bbf76981	0.3	1	No	Stage IIA	0	list(days_to_treatment_end = c(NA, NA), days_to_treatment_start = c(NA, NA), treatment_id = c("7893a993-e465-5cd6-a1d4-a2206e1a19f5", "de941c56-e85c-5d4e-a332-026300b27140"), submitter_id = c("TCGA-AA-3837_treatment_1", "TCGA-AA-3837_treatment"), treatment_type = c("Pharmaceutical Therapy, NOS", "Radiation Therapy, NOS"), regimen_or_line_of_therapy = c(NA, NA), treatment_effect = c(NA, NA), thera…	not reported	Colon, NOS	1186	24655	Mucinous adenocarcinoma	no	2008	No	6th	T3	1980-03-01	N0	M0	not reported	6bfb588f-58df-5cb6-ad0c-c1193cdda0fd	C18.9	Colon, NOS	Not Reported	not reported	Not Reported	91f8905e-fadc-5ce8-a2e6-2221281b201c	not reported
TCGA-AA-3815-01A-01R-1022-07	TCGA-AA-3815	TCGA-AA-3815-01A	TP	Primary solid Tumor	TCGA-AA-3815-01A	1	Primary	6321d710-519e-41b5-a728-c4ebc1f0bc11	TCGA-AA-3815	Primary Tumor	NA	Solid Tissue	released	FALSE	Tumor	Unknown	Not Reported	NA	NA	0.9	a3edde6c-4fbe-4690-98b2-64cbc817a365	0.3	1	No	Stage IIA	0	list(treatment_intent_type = c(NA, NA), updated_datetime = c("2019-07-31T18:34:59.839783-05:00", "2019-07-31T18:34:59.839783-05:00"), treatment_id = c("3285e3ab-1be3-58c7-8c02-75e01dcbe8f9", "4ebfe82e-51ec-5bb3-af03-57f89410a78a"), submitter_id = c("TCGA-AA-3815_treatment", "TCGA-AA-3815_treatment_1"), treatment_type = c("Radiation Therapy, NOS", "Pharmaceutical Therapy, NOS"), state = c("release…	not reported	Cecum	1005	23922	Adenocarcinoma, NOS	no	2007	No	6th	T3	1940-03-01	N0	M0	not reported	ff509225-8cad-5d5d-8cc2-7c8c57c523a4	C18.0	Cecum	Not Reported	not reported	Not Reported	0eb6beef-2d11-5c69-80c4-5097f35ea231	not reported
TCGA-AA-3973-01A-01R-1022-07	TCGA-AA-3973	TCGA-AA-3973-01A	TP	Primary solid Tumor	TCGA-AA-3973-01A	1	Primary	6de71018-d57a-4b0f-a2d3-5ca317889dd1	TCGA-AA-3973	Primary Tumor	NA	Solid Tissue	released	FALSE	Tumor	Unknown	Not Reported	NA	NA	0.6	9e835a08-c992-405b-a4aa-be4c570a695c	0.3	0.9	No	Stage IV	0	list(days_to_treatment_end = c(NA, NA), days_to_treatment_start = c(NA, NA), treatment_id = c("44bd85c5-df8c-509e-ae88-79e0f035614b", "f994da7a-798f-5399-945a-c12a0593bc8c"), submitter_id = c("TCGA-AA-3973_treatment_1", "TCGA-AA-3973_treatment"), treatment_type = c("Pharmaceutical Therapy, NOS", "Radiation Therapy, NOS"), regimen_or_line_of_therapy = c(NA, NA), treatment_effect = c(NA, NA), thera…	not reported	Colon, NOS	397	25536	Adenocarcinoma, NOS	no	2007	No	5th	T4	1940-03-01	N1	M1	not reported	2893b098-4b2e-5401-8bac-2e4888f4e30f	C18.9	Colon, NOS	Not Reported	not reported	Not Reported	df2709ff-cd09-5afd-a236-a90f598bc813	not reported
TCGA-CK-4947-01B-11R-1653-07	TCGA-CK-4947	TCGA-CK-4947-01B	TP	Primary solid Tumor	TCGA-CK-4947-01B	1	Primary	353ef4f3-1c2e-4f6c-a6c9-2e4404c62efe	TCGA-CK-4947	Primary Tumor	NA	Solid Tissue	released	FALSE	Tumor	Unknown	Not Reported	NA	NA	0.6	a9e32496-0ecb-4c68-963c-ff8fe4aaa62e	0.4	0.6	No	Stage IIIB	0	list(treatment_intent_type = c(NA, NA), updated_datetime = c("2019-07-31T18:30:39.997882-05:00", "2019-07-31T18:30:39.997882-05:00"), treatment_id = c("22e90399-92fa-5467-bf62-e1b2c7638416", "d0e1886b-a422-5e91-b5cd-a238fe84e8c4"), submitter_id = c("TCGA-CK-4947_treatment", "TCGA-CK-4947_treatment_1"), treatment_type = c("Radiation Therapy, NOS", "Pharmaceutical Therapy, NOS"), state = c("release…	not reported	Sigmoid colon	534	16980	Adenocarcinoma, NOS	no	2003	No	6th	T4	1940-03-01	N1	M0	not reported	712fbcfb-670c-5aeb-8996-7b58d3e88ff8	C18.7	Sigmoid colon	Not Reported	not reported	Not Reported	3b2c143a-e0ff-5066-9a4e-783817225237	white
TCGA-A6-2672-01A-01R-0826-07	TCGA-A6-2672	TCGA-A6-2672-01A	TP	Primary solid Tumor	TCGA-A6-2672-01A	1	Primary	ebb1c63f-0862-4859-8ad1-5f1b86050635	TCGA-A6-2672	Primary Tumor	NA	Solid Tissue	released	FALSE	Tumor	Unknown	Not Reported	NA	NA	0.8	8405a327-719d-4c6d-99f4-a58306c8fdc4	0.4	1.3	No	Stage IIIB	0	list(days_to_treatment_end = c(NA, NA), days_to_treatment_start = c(NA, NA), treatment_id = c("c58cffd6-9c82-50e2-8bbd-eceb4d57e940", "f78e7d8d-64f7-5c68-a701-517e6b271774"), submitter_id = c("TCGA-A6-2672_treatment_1", "TCGA-A6-2672_treatment"), treatment_type = c("Pharmaceutical Therapy, NOS", "Radiation Therapy, NOS"), regimen_or_line_of_therapy = c(NA, NA), treatment_effect = c(NA, NA), thera…	not reported	Colon, NOS	1419	30237	Adenocarcinoma, NOS	no	2009	No	NA	T3	1940-03-01	N1	M0	not reported	e44a132f-749a-5557-bf02-ed71326b0393	C18.2	Cecum	Not Reported	not reported	Not Reported	f6e0dd1b-5833-5c9d-82f1-c2df35fbc328	white
TCGA-AZ-4614-01A-01R-1410-07	TCGA-AZ-4614	TCGA-AZ-4614-01A	TP	Primary solid Tumor	TCGA-AZ-4614-01A	1	Primary	0c4daf52-cc9f-4099-8825-33c484ced5b1	TCGA-AZ-4614	Primary Tumor	NA	Solid Tissue	released	FALSE	Tumor	Unknown	Not Reported	NA	NA	0.8	fc88fd70-b6f7-4130-a72e-ea2d11c9f27c	0.4	2.1	No	Stage IVA	0	list(treatment_intent_type = c(NA, NA), updated_datetime = c("2019-07-31T18:26:25.647975-05:00", "2019-07-31T18:26:25.647975-05:00"), treatment_id = c("7cac437a-b8b9-5e6e-ad28-78b10d939f30", "8c183581-0da4-50e3-9f76-8fb58e9a68a6"), submitter_id = c("TCGA-AZ-4614_treatment", "TCGA-AZ-4614_treatment_1"), treatment_type = c("Radiation Therapy, NOS", "Pharmaceutical Therapy, NOS"), state = c("release…	not reported	Cecum	NA	26267	Adenocarcinoma, NOS	no	2008	No	NA	T4a	1940-03-01	N1	M1	not reported	7a98a635-deab-5375-a629-3f9b94559c70	C18.0	Cecum	Not Reported	not reported	Not Reported	7c2b0a68-f0c2-5221-8410-f17e692f8130	white
TCGA-D5-6932-01A-11R-1928-07	TCGA-D5-6932	TCGA-D5-6932-01A	TP	Primary solid Tumor	TCGA-D5-6932-01A	1	Primary	5673c112-6eb1-41b3-a797-c9ffff67632c	TCGA-D5-6932	Primary Tumor	NA	Solid Tissue	released	FALSE	Tumor	Unknown	Not Reported	NA	NA	0.9	ee1bb225-b1a2-4ff4-8c7d-e01a748bca32	0.4	1	No	Stage IIA	0	list(treatment_intent_type = c(NA, NA), updated_datetime = c("2019-07-31T18:23:51.069463-05:00", "2019-07-31T18:23:51.069463-05:00"), treatment_id = c("9ef83c71-a5e8-586b-b56b-f18aff8baabd", "dec078cd-03ff-505b-ac2c-a33c16565478"), submitter_id = c("TCGA-D5-6932_treatment", "TCGA-D5-6932_treatment_1"), treatment_type = c("Radiation Therapy, NOS", "Pharmaceutical Therapy, NOS"), state = c("release…	not reported	Colon, NOS	346	25466	Adenocarcinoma, NOS	no	2011	No	7th	T3	1940-03-01	N0	M0	not reported	dc47ad7a-9328-5797-9ac5-3254fc2bc4b9	C18.9	Colon, NOS	Not Reported	not reported	Not Reported	b0cf7155-099c-5504-8635-eaa188f704b7	white
TCGA-AA-3555-01A-01R-0821-07	TCGA-AA-3555	TCGA-AA-3555-01A	TP	Primary solid Tumor	TCGA-AA-3555-01A	1	Primary	9f9961f0-4ee2-4471-ae4a-a0122d630a28	TCGA-AA-3555	Primary Tumor	NA	Solid Tissue	released	FALSE	Tumor	Unknown	Not Reported	NA	NA	1	bcb3b665-0cfc-4d89-99fa-750d897e15d8	0.4	1.3	No	Stage IIA	0	list(treatment_intent_type = c(NA, NA), updated_datetime = c("2019-07-31T18:26:46.449505-05:00", "2019-07-31T18:26:46.449505-05:00"), treatment_id = c("f189f9c1-4468-5c56-a4ae-0fbf1d586bd3", "f411ee46-7cb7-500e-bacb-ff6822da7f63"), submitter_id = c("TCGA-AA-3555_treatment", "TCGA-AA-3555_treatment_1"), treatment_type = c("Radiation Therapy, NOS", "Pharmaceutical Therapy, NOS"), state = c("release…	not reported	Colon, NOS	911	29617	Mucinous adenocarcinoma	no	2008	No	6th	T3	1980-03-01	N0	M0	not reported	25b239a7-ab82-5ab9-ae57-038444646fcf	C18.9	Colon, NOS	Not Reported	not reported	Not Reported	20c344a8-2b1f-5a9e-b2c3-798354ce4121	not reported
TCGA-AA-A01R-01A-21R-A083-07	TCGA-AA-A01R	TCGA-AA-A01R-01A	TP	Primary solid Tumor	TCGA-AA-A01R-01A	1	Primary	73ee34e8-422d-4ab1-b0f0-da8a5a2dd9ab	TCGA-AA-A01R	Primary Tumor	FALSE	Solid Tissue	released	FALSE	Tumor	Unknown	Not Reported	2181	920	NA	DD52773D-8352-4DD1-84FC-8C9BABB9C5AB	NA	NA	No	Stage III	0	list(days_to_treatment_end = c(NA, NA), days_to_treatment_start = c(NA, NA), treatment_id = c("210f9f04-c18f-5366-9014-5f60c07a4828", "eabd4faa-1f5b-5524-910e-be97f075c066"), submitter_id = c("TCGA-AA-A01R_treatment_1", "TCGA-AA-A01R_treatment"), treatment_type = c("Pharmaceutical Therapy, NOS", "Radiation Therapy, NOS"), regimen_or_line_of_therapy = c(NA, NA), treatment_effect = c(NA, NA), thera…	not reported	Ascending colon	1065	17289	Mucinous adenocarcinoma	no	2004	No	5th	T3	1980-03-01	N2	M0	not reported	1e2bbe44-f276-58dc-a71a-965c0d535f44	C18.2	Ascending colon	Not Reported	not reported	Not Reported	6f468191-477f-5fe7-b437-192db337964b	not reported
TCGA-AA-3845-01A-01R-1022-07	TCGA-AA-3845	TCGA-AA-3845-01A	TP	Primary solid Tumor	TCGA-AA-3845-01A	1	Primary	c255e546-c53c-4225-9721-f5050c45e1b8	TCGA-AA-3845	Primary Tumor	NA	Solid Tissue	released	FALSE	Tumor	Unknown	Not Reported	NA	NA	0.8	afff68af-721b-4271-8c94-1c071bb75321	0.6	1	No	Stage IIA	0	list(days_to_treatment_end = c(NA, NA), days_to_treatment_start = c(NA, NA), treatment_id = c("6b2545f7-ed64-5da7-9006-0887611be839", "a18da306-da52-5b84-acb1-ecdf62fe86a5"), submitter_id = c("TCGA-AA-3845_treatment_1", "TCGA-AA-3845_treatment"), treatment_type = c("Pharmaceutical Therapy, NOS", "Radiation Therapy, NOS"), regimen_or_line_of_therapy = c(NA, NA), treatment_effect = c(NA, NA), thera…	not reported	Ascending colon	NA	31593	Adenocarcinoma, NOS	no	2009	No	6th	T3	1940-03-01	N0	M0	not reported	421e4007-9275-5853-a691-117ab93e362e	C18.2	Ascending colon	Not Reported	not reported	Not Reported	27488c7f-ff28-5939-8b5e-f07da054c559	not reported
TCGA-AA-A004-01A-01R-A00A-07	TCGA-AA-A004	TCGA-AA-A004-01A	TP	Primary solid Tumor	TCGA-AA-A004-01A	1	Primary	56092e8e-a259-4178-8682-16518367d20c	TCGA-AA-A004	Primary Tumor	FALSE	Solid Tissue	released	FALSE	Tumor	Unknown	Not Reported	385	210	NA	A4C2CE68-97FC-4EA6-AAD0-75F0B0EC3AD2	NA	NA	No	Stage IIA	0	list(days_to_treatment_end = c(NA, NA), days_to_treatment_start = c(NA, NA), treatment_id = c("3d3cc9e6-c592-5beb-b417-af37b6b752e6", "6f11fd84-7a76-5824-8fc5-fd0073bc7863"), submitter_id = c("TCGA-AA-A004_treatment_1", "TCGA-AA-A004_treatment"), treatment_type = c("Pharmaceutical Therapy, NOS", "Radiation Therapy, NOS"), regimen_or_line_of_therapy = c(NA, NA), treatment_effect = c(NA, NA), thera…	not reported	Sigmoid colon	424	27943	Adenocarcinoma, NOS	no	2009	No	6th	T3	1940-03-01	N0	M0	not reported	ab8fea0d-211f-542c-ac65-acece7b79549	C18.7	Sigmoid colon	Not Reported	not reported	Not Reported	5b9cee38-2a62-528c-a21d-f67c59a2113e	not reported
TCGA-A6-A567-01A-31R-A28H-07	TCGA-A6-A567	TCGA-A6-A567-01A	TP	Primary solid Tumor	TCGA-A6-A567-01A	1	Primary	ed37a5c0-341c-4ecc-8fb8-4b705e76e2af	TCGA-A6-A567	Primary Tumor	FALSE	Solid Tissue	released	FALSE	Tumor	Unknown	Not Reported	2056	530	NA	E166D77A-9C39-4B86-9320-8946DA9AA69D	NA	NA	No	Stage IV	0	list(treatment_intent_type = c(NA, NA), updated_datetime = c("2019-07-31T15:53:43.119098-05:00", "2019-07-31T15:53:43.119098-05:00"), treatment_id = c("45f7034d-fefc-5a5b-abe2-1bf0f3fa7a9e", "60504bdb-16d8-5902-9eca-dba79816bde5"), submitter_id = c("TCGA-A6-A567_treatment", "TCGA-A6-A567_treatment_1"), treatment_type = c("Radiation Therapy, NOS", "Pharmaceutical Therapy, NOS"), state = c("release…	not reported	Sigmoid colon	NA	20493	Adenocarcinoma, NOS	no	2007	No	6th	T3	1940-03-01	N1	M1	not reported	f77acdbc-3857-5ce7-a3f9-4e01e49f5ca7	C18.7	Sigmoid colon	Not Reported	not reported	Not Reported	eb0d2d0c-0748-551d-b791-43bca21bdf95	black or african american
TCGA-AA-3710-01A-01R-1022-07	TCGA-AA-3710	TCGA-AA-3710-01A	TP	Primary solid Tumor	TCGA-AA-3710-01A	1	Primary	70f388b9-4642-41d8-8a78-8f76a8f37943	TCGA-AA-3710	Primary Tumor	NA	Solid Tissue	released	FALSE	Tumor	Unknown	Not Reported	NA	NA	1	cafe6b42-0750-48e0-80fe-3aacaa8fc9b3	0.4	1	No	Stage IIA	0	list(days_to_treatment_end = c(NA, NA), days_to_treatment_start = c(NA, NA), treatment_id = c("4cdc0dcc-f91c-5187-be2d-a296de00e566", "879ffd4e-ed8a-573f-ad07-804f4f3fab7a"), submitter_id = c("TCGA-AA-3710_treatment_1", "TCGA-AA-3710_treatment"), treatment_type = c("Pharmaceutical Therapy, NOS", "Radiation Therapy, NOS"), regimen_or_line_of_therapy = c(NA, NA), treatment_effect = c(NA, NA), thera…	not reported	Ascending colon	821	29465	Adenocarcinoma, NOS	no	2008	No	6th	T3	1940-03-01	N0	M0	not reported	bd242807-ccd1-5fe1-a565-56ac9c5e322d	C18.2	Hepatic flexure of colon	Not Reported	not reported	Not Reported	e7add36b-4378-5ad4-8a75-9bb6a8f7b04c	not reported
TCGA-A6-5659-01A-01R-1653-07	TCGA-A6-5659	TCGA-A6-5659-01A	TP	Primary solid Tumor	TCGA-A6-5659-01A	1	Primary	7bbba7d3-c921-4063-8a82-3496aa6b89d5	TCGA-A6-5659	Primary Tumor	NA	Solid Tissue	released	FALSE	Tumor	Unknown	Not Reported	NA	NA	0.6	16172149-a834-4f41-a786-5d87a69fc65c	0.4	1.5	No	Stage I	0	list(treatment_intent_type = c(NA, NA), updated_datetime = c("2019-07-31T18:33:11.158741-05:00", "2019-07-31T18:33:11.158741-05:00"), treatment_id = c("34ca33a1-59da-55ed-a02b-c174f961f1ef", "e4c2ac8c-3e2c-5b97-bd59-9f3f0237a25a"), submitter_id = c("TCGA-A6-5659_treatment", "TCGA-A6-5659_treatment_1"), treatment_type = c("Radiation Therapy, NOS", "Pharmaceutical Therapy, NOS"), state = c("release…	not reported	Colon, NOS	926	30028	Adenocarcinoma, NOS	no	2010	No	NA	T2	1940-03-01	N0	M0	not reported	98c4bea5-1f9c-5c13-adc8-21ed84b5f07b	C18.2	Cecum	Not Reported	not reported	Not Reported	e9cc41ee-0309-53cd-a6a6-df68fc02b452	white
TCGA-CA-5254-01A-21R-1839-07	TCGA-CA-5254	TCGA-CA-5254-01A	TP	Primary solid Tumor	TCGA-CA-5254-01A	1	Primary	7a775f5c-32e5-4d88-b647-e1326ab369fd	TCGA-CA-5254	Primary Tumor	NA	Solid Tissue	released	FALSE	Tumor	Unknown	Not Reported	NA	NA	1	3c13e71b-abcb-4131-bda1-4723f13f23ee	0.3	1.5	No	Stage IIA	0	list(treatment_intent_type = c(NA, NA), updated_datetime = c("2019-07-31T18:25:23.751819-05:00", "2019-07-31T18:25:23.751819-05:00"), treatment_id = c("8f0b882b-623d-569c-b6ad-456b01356526", "ac271767-e6c6-51cf-aaf0-1660f1bc432e"), submitter_id = c("TCGA-CA-5254_treatment", "TCGA-CA-5254_treatment_1"), treatment_type = c("Radiation Therapy, NOS", "Pharmaceutical Therapy, NOS"), state = c("release…	not reported	Colon, NOS	386	15415	Adenocarcinoma, NOS	no	2010	No	6th	T3	1940-03-01	N0	M0	not reported	4dc6ee72-f99b-50f6-aaa6-3b43649762ae	C18.9	Colon, NOS	Not Reported	not reported	Not Reported	e68f4357-8ad2-57c0-8040-941e3cd91433	asian
TCGA-A6-5659-01B-04R-A277-07	TCGA-A6-5659	TCGA-A6-5659-01B	TP	Primary solid Tumor	TCGA-A6-5659-01B	1	Primary	81f1e9f6-541f-43df-93cf-c11a569bac93	TCGA-A6-5659	Primary Tumor	FALSE	Solid Tissue	released	TRUE	Tumor	FFPE	Not Reported	574	NA	NA	16172149-a834-4f41-a786-5d87a69fc65c	NA	NA	No	Stage I	0	list(treatment_intent_type = c(NA, NA), updated_datetime = c("2019-07-31T18:33:11.158741-05:00", "2019-07-31T18:33:11.158741-05:00"), treatment_id = c("34ca33a1-59da-55ed-a02b-c174f961f1ef", "e4c2ac8c-3e2c-5b97-bd59-9f3f0237a25a"), submitter_id = c("TCGA-A6-5659_treatment", "TCGA-A6-5659_treatment_1"), treatment_type = c("Radiation Therapy, NOS", "Pharmaceutical Therapy, NOS"), state = c("release…	not reported	Colon, NOS	926	30028	Adenocarcinoma, NOS	no	2010	No	NA	T2	1940-03-01	N0	M0	not reported	98c4bea5-1f9c-5c13-adc8-21ed84b5f07b	C18.2	Cecum	Not Reported	not reported	Not Reported	e9cc41ee-0309-53cd-a6a6-df68fc02b452	white
TCGA-A6-5666-01A-01R-1653-07	TCGA-A6-5666	TCGA-A6-5666-01A	TP	Primary solid Tumor	TCGA-A6-5666-01A	1	Primary	528f5c3e-6b0f-48e7-a57b-56ccd1ec2352	TCGA-A6-5666	Primary Tumor	NA	Solid Tissue	released	FALSE	Tumor	Unknown	Not Reported	NA	NA	0.7	6496f931-2a98-43c3-8b80-7f658d4ea9ab	0.6	1.9	No	Stage IIC	0	list(days_to_treatment_end = c(NA, NA), days_to_treatment_start = c(NA, NA), treatment_id = c("40fbe4d2-8c17-5dc1-8c5d-0098962e73fb", "e6a5b94d-ce86-5d3e-83e8-b212d56027cf"), submitter_id = c("TCGA-A6-5666_treatment_1", "TCGA-A6-5666_treatment"), treatment_type = c("Pharmaceutical Therapy, NOS", "Radiation Therapy, NOS"), regimen_or_line_of_therapy = c(NA, NA), treatment_effect = c(NA, NA), thera…	not reported	Colon, NOS	995	28514	Adenocarcinoma, NOS	no	2010	No	NA	T4b	1940-03-01	N0	M0	not reported	cf1a7629-300d-543e-91eb-c63ef4d55991	C18.9	Colon, NOS	Not Reported	not reported	Not Reported	4686bfcb-fece-563e-8f12-f0976da0ef2a	white
TCGA-D5-6930-01A-11R-1928-07	TCGA-D5-6930	TCGA-D5-6930-01A	TP	Primary solid Tumor	TCGA-D5-6930-01A	1	Primary	82e7493d-1346-4598-91c9-a5582b337c21	TCGA-D5-6930	Primary Tumor	NA	Solid Tissue	released	FALSE	Tumor	Unknown	Not Reported	NA	NA	0.6	0a3fa5b6-52b9-481b-a07f-c62fabc32cc3	0.5	0.9	No	Stage IIA	0	list(days_to_treatment_end = c(NA, NA), days_to_treatment_start = c(NA, NA), treatment_id = c("83d1e1d0-0e77-53a6-9dd8-846282e42452", "fa798d2f-bdf0-587f-9356-3b0ec2c30173"), submitter_id = c("TCGA-D5-6930_treatment_1", "TCGA-D5-6930_treatment"), treatment_type = c("Pharmaceutical Therapy, NOS", "Radiation Therapy, NOS"), regimen_or_line_of_therapy = c(NA, NA), treatment_effect = c(NA, NA), thera…	not reported	Cecum	406	24764	Mucinous adenocarcinoma	no	2011	No	7th	T3	1980-03-01	N0	M0	not reported	af57e04f-922e-5a31-b1f0-4a2ae169f575	C18.0	Ascending colon	Not Reported	not reported	Not Reported	2e9f4938-f5c1-52f8-b5f7-698f053a1679	white
TCGA-AU-6004-01A-11R-1723-07	TCGA-AU-6004	TCGA-AU-6004-01A	TP	Primary solid Tumor	TCGA-AU-6004-01A	1	Primary	09ddb59b-46b1-42d3-bb06-62e67a213394	TCGA-AU-6004	Primary Tumor	NA	Solid Tissue	released	FALSE	Tumor	Unknown	Not Reported	NA	NA	0.6	28578993-a474-4afb-93b6-46665b90e1b2	0.3	1	No	Stage I	0	list(days_to_treatment_end = c(NA, NA), days_to_treatment_start = c(NA, NA), treatment_id = c("954779bb-0ba2-5a4c-8252-71a274b92197", "a16d82e6-93ca-52b2-a858-23c8726f15ac"), submitter_id = c("TCGA-AU-6004_treatment_1", "TCGA-AU-6004_treatment"), treatment_type = c("Pharmaceutical Therapy, NOS", "Radiation Therapy, NOS"), regimen_or_line_of_therapy = c(NA, NA), treatment_effect = c(NA, NA), thera…	not reported	Cecum	824	25259	Adenocarcinoma, NOS	no	2010	No	7th	T2	1940-03-01	N0	M0	not reported	cd9b87fb-e8d2-56c0-a3c6-d3bd74294c70	C18.0	Cecum	Not Reported	not reported	Not Reported	d9de8e68-8325-55fd-b0be-7a6ddd35a9b0	white
TCGA-AA-3947-01A-01R-1022-07	TCGA-AA-3947	TCGA-AA-3947-01A	TP	Primary solid Tumor	TCGA-AA-3947-01A	1	Primary	5241539d-65ac-434d-8eaa-ae57f702c8ce	TCGA-AA-3947	Primary Tumor	NA	Solid Tissue	released	FALSE	Tumor	Unknown	Not Reported	NA	NA	1	b9614eb3-7a7f-4737-8e48-c13564ee1a4c	0.4	1.5	No	Stage IIB	0	list(days_to_treatment_end = c(NA, NA), days_to_treatment_start = c(NA, NA), treatment_id = c("4666d992-2903-5a4b-9980-fe480a61e530", "a6865dbb-4074-5861-881c-66664e2206f8"), submitter_id = c("TCGA-AA-3947_treatment_1", "TCGA-AA-3947_treatment"), treatment_type = c("Pharmaceutical Therapy, NOS", "Radiation Therapy, NOS"), regimen_or_line_of_therapy = c(NA, NA), treatment_effect = c(NA, NA), thera…	not reported	Colon, NOS	1004	22035	Mucinous adenocarcinoma	no	2009	No	6th	T4	1980-03-01	N0	M0	not reported	288291d6-496d-5827-b688-649d277b4cbf	C18.9	Colon, NOS	Not Reported	not reported	Not Reported	f1da1e97-2c19-5d2d-9d43-1bf7a50201fe	not reported
TCGA-D5-6536-01A-11R-1723-07	TCGA-D5-6536	TCGA-D5-6536-01A	TP	Primary solid Tumor	TCGA-D5-6536-01A	1	Primary	258dd9ce-a865-44d8-a665-f52f3cd368c1	TCGA-D5-6536	Primary Tumor	NA	Solid Tissue	released	FALSE	Tumor	Unknown	Not Reported	NA	NA	0.8	6c5cf659-1dea-4ba4-8e62-9cf19384f72a	0.4	1	No	Stage IIA	0	list(days_to_treatment_end = c(NA, NA), days_to_treatment_start = c(NA, NA), treatment_id = c("36e1f9c8-c75e-5a59-ac91-7c287a6d3a00", "f8d19b08-71c1-51f4-912b-bae9bbb8432e"), submitter_id = c("TCGA-D5-6536_treatment_1", "TCGA-D5-6536_treatment"), treatment_type = c("Pharmaceutical Therapy, NOS", "Radiation Therapy, NOS"), regimen_or_line_of_therapy = c(NA, NA), treatment_effect = c(NA, NA), thera…	not reported	Colon, NOS	543	26890	Adenocarcinoma, NOS	no	2010	No	7th	T3	1940-03-01	N0	M0	not reported	81065b87-a6cc-5582-b165-717cfec835b8	C18.9	Colon, NOS	Not Reported	not reported	Not Reported	e4702c49-cc0b-5162-9d8e-e5e332b89bbe	white
TCGA-F4-6704-11A-01R-1839-07	TCGA-F4-6704	TCGA-F4-6704-11A	NT	Solid Tissue Normal	TCGA-F4-6704-11A	11	Not Applicable	22726e86-e657-4d50-82f7-43b8d107abf5	TCGA-F4-6704	Solid Tissue Normal	NA	Solid Tissue	released	FALSE	Normal	Unknown	Not Reported	NA	NA	0.9	NA	0.7	2.5	No	Stage IIIC	0	list(treatment_intent_type = c(NA, NA), updated_datetime = c("2019-07-31T18:36:37.448631-05:00", "2019-07-31T18:36:37.448631-05:00"), treatment_id = c("b1a866e9-e659-5197-867e-237c7039d863", "e10090c1-94ec-5664-95cd-e300f47ddb5e"), submitter_id = c("TCGA-F4-6704_treatment", "TCGA-F4-6704_treatment_1"), treatment_type = c("Radiation Therapy, NOS", "Pharmaceutical Therapy, NOS"), state = c("release…	not reported	Sigmoid colon	47	21949	Mucinous adenocarcinoma	no	2011	No	7th	T3	1980-03-01	N2b	MX	not reported	95fe5961-1169-5a88-8ea9-143da2b58902	C18.7	Sigmoid colon	Not Reported	not reported	Not Reported	fa4beb6a-bb64-51be-9dcd-4cd2612e171b	american indian or alaska native
TCGA-AA-3663-11A-01R-1723-07	TCGA-AA-3663	TCGA-AA-3663-11A	NT	Solid Tissue Normal	TCGA-AA-3663-11A	11	Not Applicable	b9a75b12-9df0-4048-b0fe-48041361fa29	TCGA-AA-3663	Solid Tissue Normal	NA	Solid Tissue	released	FALSE	Normal	Unknown	Not Reported	NA	NA	0.9	NA	0.3	1.1	No	Stage II	0	list(days_to_treatment_end = c(NA, NA), days_to_treatment_start = c(NA, NA), treatment_id = c("7b2ec202-26fb-5de1-9f02-e464decbbde3", "97d3fc0b-f536-525c-be4d-ed52ec41587e"), submitter_id = c("TCGA-AA-3663_treatment_1", "TCGA-AA-3663_treatment"), treatment_type = c("Pharmaceutical Therapy, NOS", "Radiation Therapy, NOS"), regimen_or_line_of_therapy = c(NA, NA), treatment_effect = c(NA, NA), thera…	not reported	Cecum	212	15675	Adenocarcinoma, NOS	no	2005	No	5th	T3	1940-03-01	N0	M0	not reported	adc29aad-bc6c-5ec7-8192-69c7c0515e3f	C18.0	Cecum	Not Reported	not reported	Not Reported	722293d2-0c59-59d3-99f7-8a3ec4497a7e	not reported
TCGA-F4-6704-01A-11R-1839-07	TCGA-F4-6704	TCGA-F4-6704-01A	TP	Primary solid Tumor	TCGA-F4-6704-01A	1	Primary	b35229f7-d11e-4357-ab86-53e9a5867f55	TCGA-F4-6704	Primary Tumor	NA	Solid Tissue	released	FALSE	Tumor	Unknown	Not Reported	NA	NA	1.1	fde549ee-a203-4d65-8f24-9f450e6f3857	0.5	2	No	Stage IIIC	0	list(treatment_intent_type = c(NA, NA), updated_datetime = c("2019-07-31T18:36:37.448631-05:00", "2019-07-31T18:36:37.448631-05:00"), treatment_id = c("b1a866e9-e659-5197-867e-237c7039d863", "e10090c1-94ec-5664-95cd-e300f47ddb5e"), submitter_id = c("TCGA-F4-6704_treatment", "TCGA-F4-6704_treatment_1"), treatment_type = c("Radiation Therapy, NOS", "Pharmaceutical Therapy, NOS"), state = c("release…	not reported	Sigmoid colon	47	21949	Mucinous adenocarcinoma	no	2011	No	7th	T3	1980-03-01	N2b	MX	not reported	95fe5961-1169-5a88-8ea9-143da2b58902	C18.7	Sigmoid colon	Not Reported	not reported	Not Reported	fa4beb6a-bb64-51be-9dcd-4cd2612e171b	american indian or alaska native
TCGA-D5-5539-01A-01R-1653-07	TCGA-D5-5539	TCGA-D5-5539-01A	TP	Primary solid Tumor	TCGA-D5-5539-01A	1	Primary	4cf1fa0f-6a00-4037-94d1-d5ce2012b2f5	TCGA-D5-5539	Primary Tumor	NA	Solid Tissue	released	FALSE	Tumor	Unknown	Not Reported	NA	NA	0.5	1cfcf7e7-0886-4a24-9ab4-fcc10e998779	0.4	0.7	No	Stage IIIA	0	list(days_to_treatment_end = c(NA, NA), days_to_treatment_start = c(NA, NA), treatment_id = c("02bf4b33-3358-5abe-a41f-f89fa7d1bde2", "61cd9821-ddc0-587f-b57e-2bb8d8fb5fdc"), submitter_id = c("TCGA-D5-5539_treatment_1", "TCGA-D5-5539_treatment"), treatment_type = c("Pharmaceutical Therapy, NOS", "Radiation Therapy, NOS"), regimen_or_line_of_therapy = c(NA, NA), treatment_effect = c(NA, NA), thera…	not reported	Ascending colon	596	22097	Mucinous adenocarcinoma	no	2010	No	NA	T3	1980-03-01	N1	M0	not reported	b0cf33e0-db3f-59e0-a094-fe220669e16e	C18.2	Ascending colon	Not Reported	not reported	Not Reported	1eb007a1-7014-550b-b593-66bdab4f14e7	white
TCGA-AZ-6600-11A-01R-1774-07	TCGA-AZ-6600	TCGA-AZ-6600-11A	NT	Solid Tissue Normal	TCGA-AZ-6600-11A	11	Not Applicable	08c40bb6-9ad3-4ba7-8d4a-132327a0d7e7	TCGA-AZ-6600	Solid Tissue Normal	NA	Solid Tissue	released	FALSE	Normal	Unknown	Not Reported	NA	NA	1	NA	0.4	2	No	Stage IV	0	list(days_to_treatment_end = c(NA, NA), days_to_treatment_start = c(NA, NA), treatment_id = c("d10547cf-fec1-5b9f-8830-f9bd9e561bfc", "e92da8e7-b8b1-50cc-9436-afd25958f9d0"), submitter_id = c("TCGA-AZ-6600_treatment_1", "TCGA-AZ-6600_treatment"), treatment_type = c("Pharmaceutical Therapy, NOS", "Radiation Therapy, NOS"), regimen_or_line_of_therapy = c(NA, NA), treatment_effect = c(NA, NA), thera…	not reported	Ascending colon	NA	23581	Adenocarcinoma, NOS	no	2001	No	5th	T4	1940-03-01	N1	M1	not reported	1e80f65b-6805-5579-b995-78644a73fac4	C18.2	Ascending colon	Not Reported	not reported	Not Reported	60a70558-ebca-573f-92fe-1c2d3eb32d2c	black or african american
TCGA-A6-2684-01A-01R-A278-07	TCGA-A6-2684	TCGA-A6-2684-01A	TP	Primary solid Tumor	TCGA-A6-2684-01A	1	Primary	73b6994e-c9bf-41a8-a455-17d7be309a9f	TCGA-A6-2684	Primary Tumor	NA	Solid Tissue	released	FALSE	Tumor	Unknown	Not Reported	NA	NA	0.9	9dabf713-dd0c-4388-b69e-f1bbb08e4d21	0.4	1	No	Stage I	0	list(treatment_intent_type = c(NA, NA), updated_datetime = c("2019-07-31T18:28:19.797349-05:00", "2019-07-31T18:28:19.797349-05:00"), treatment_id = c("1de044b2-fb47-5404-8f34-c51eabe91136", "9f3d6bda-e58b-5e9e-b68b-ff65cd96dd36"), submitter_id = c("TCGA-A6-2684_treatment", "TCGA-A6-2684_treatment_1"), treatment_type = c("Radiation Therapy, NOS", "Pharmaceutical Therapy, NOS"), state = c("release…	not reported	Colon, NOS	1127	27708	Adenocarcinoma, NOS	no	2009	No	NA	T2	1940-03-01	N0	M0	not reported	808ef8fb-23c4-5b7f-9546-90aba7a19854	C18.9	Colon, NOS	Not Reported	not reported	Not Reported	2a3d1ea4-8843-5edf-8e38-51552d28573a	white
TCGA-AA-3684-01A-02R-0905-07	TCGA-AA-3684	TCGA-AA-3684-01A	TP	Primary solid Tumor	TCGA-AA-3684-01A	1	Primary	47ddad9d-1e43-4961-a5d1-55882f68b446	TCGA-AA-3684	Primary Tumor	NA	Solid Tissue	released	FALSE	Tumor	Unknown	Not Reported	NA	NA	0.8	2ff5db80-95db-4eb6-9b72-25c83c492653	0.8	1.8	No	Stage IV	0	list(days_to_treatment_end = c(NA, NA), days_to_treatment_start = c(NA, NA), treatment_id = c("65cc1bf2-3bcb-5ac3-aeb1-ac9e230a395a", "e6c4bdb6-6c54-5d61-8219-4b2b2eeabf99"), submitter_id = c("TCGA-AA-3684_treatment_1", "TCGA-AA-3684_treatment"), treatment_type = c("Pharmaceutical Therapy, NOS", "Radiation Therapy, NOS"), regimen_or_line_of_therapy = c(NA, NA), treatment_effect = c(NA, NA), thera…	not reported	Cecum	0	23741	Mucinous adenocarcinoma	no	2007	No	5th	T4	1980-03-01	N2	M1	not reported	0282bb0f-aab6-504c-ab3d-ad5501c29619	C18.0	Cecum	Not Reported	not reported	Not Reported	dd216ea8-2f49-51ad-90b1-ffc80db7fc29	not reported
TCGA-A6-2684-01C-08R-A277-07	TCGA-A6-2684	TCGA-A6-2684-01C	TP	Primary solid Tumor	TCGA-A6-2684-01C	1	Primary	ec9fc2bb-859d-4a11-8a12-e109075eff8c	TCGA-A6-2684	Primary Tumor	FALSE	Solid Tissue	released	TRUE	Tumor	FFPE	Not Reported	861	NA	NA	9dabf713-dd0c-4388-b69e-f1bbb08e4d21	NA	NA	No	Stage I	0	list(treatment_intent_type = c(NA, NA), updated_datetime = c("2019-07-31T18:28:19.797349-05:00", "2019-07-31T18:28:19.797349-05:00"), treatment_id = c("1de044b2-fb47-5404-8f34-c51eabe91136", "9f3d6bda-e58b-5e9e-b68b-ff65cd96dd36"), submitter_id = c("TCGA-A6-2684_treatment", "TCGA-A6-2684_treatment_1"), treatment_type = c("Radiation Therapy, NOS", "Pharmaceutical Therapy, NOS"), state = c("release…	not reported	Colon, NOS	1127	27708	Adenocarcinoma, NOS	no	2009	No	NA	T2	1940-03-01	N0	M0	not reported	808ef8fb-23c4-5b7f-9546-90aba7a19854	C18.9	Colon, NOS	Not Reported	not reported	Not Reported	2a3d1ea4-8843-5edf-8e38-51552d28573a	white
TCGA-CK-6751-01A-11R-1839-07	TCGA-CK-6751	TCGA-CK-6751-01A	TP	Primary solid Tumor	TCGA-CK-6751-01A	1	Primary	6605cdbc-a37f-4a41-a4b5-42708e5076a3	TCGA-CK-6751	Primary Tumor	NA	Solid Tissue	released	FALSE	Tumor	Unknown	Not Reported	NA	NA	0.4	c6e7f8d6-a201-4e43-ad3c-7dafdb3301e2	0.3	0.7	No	Stage I	0	list(days_to_treatment_end = c(NA, NA), days_to_treatment_start = c(NA, NA), treatment_id = c("09ab8fbc-b2e6-579d-9604-392aea487d23", "7bbb198e-5578-5137-81a3-ad457879284b"), submitter_id = c("TCGA-CK-6751_treatment_1", "TCGA-CK-6751_treatment"), treatment_type = c("Pharmaceutical Therapy, NOS", "Radiation Therapy, NOS"), regimen_or_line_of_therapy = c(NA, NA), treatment_effect = c(NA, NA), thera…	not reported	Ascending colon	518	32354	Mucinous adenocarcinoma	no	2002	No	5th	T2	1980-03-01	N0	MX	not reported	2c6d5727-1971-5a01-8b3c-a28bc09200c6	C18.2	Ascending colon	Not Reported	not reported	Not Reported	29928fa0-09aa-5ab0-9d37-4457ec820843	white
TCGA-CM-6166-01A-11R-1653-07	TCGA-CM-6166	TCGA-CM-6166-01A	TP	Primary solid Tumor	TCGA-CM-6166-01A	1	Primary	0c749ae7-1564-4ade-847f-376d21d1753b	TCGA-CM-6166	Primary Tumor	NA	Solid Tissue	released	FALSE	Tumor	Unknown	Not Reported	NA	NA	1.2	90156818-e669-4a4f-9e1a-081544e01e35	0.3	2	No	Stage I	0	list(treatment_intent_type = c(NA, NA), updated_datetime = c("2019-07-31T18:34:42.592211-05:00", "2019-07-31T18:34:42.592211-05:00"), treatment_id = c("531d7cdf-24ae-5257-8f6f-0ed8569b54fc", "64823e88-e259-5d2b-9c9a-bfe54b7912ca"), submitter_id = c("TCGA-CM-6166_treatment", "TCGA-CM-6166_treatment_1"), treatment_type = c("Radiation Therapy, NOS", "Pharmaceutical Therapy, NOS"), state = c("release…	not reported	Ascending colon	669	17807	Adenocarcinoma, NOS	no	2010	No	7th	T2	1940-03-01	N0	M0	not reported	6d96df8d-ad80-51c8-b8c1-0946514e26b7	C18.2	Ascending colon	Not Reported	not reported	Not Reported	547f2f0a-7b3e-53d7-9f3f-796df1e0ce4b	white
TCGA-F4-6855-01A-11R-1928-07	TCGA-F4-6855	TCGA-F4-6855-01A	TP	Primary solid Tumor	TCGA-F4-6855-01A	1	Primary	a04e922f-f436-45ae-ad28-5cdf9d351c3a	TCGA-F4-6855	Primary Tumor	NA	Solid Tissue	released	FALSE	Tumor	Unknown	Not Reported	NA	NA	1.1	27ee7f05-6980-4f93-acb4-4d723f1d6fc2	0.7	1.7	No	Stage IIA	0	list(days_to_treatment_end = c(NA, NA), days_to_treatment_start = c(NA, NA), treatment_id = c("aec209d0-dd94-5ad0-9743-e97e35577e55", "e906adc9-19fc-5b63-b0aa-b676708850cc"), submitter_id = c("TCGA-F4-6855_treatment_1", "TCGA-F4-6855_treatment"), treatment_type = c("Pharmaceutical Therapy, NOS", "Radiation Therapy, NOS"), regimen_or_line_of_therapy = c(NA, NA), treatment_effect = c(NA, NA), thera…	not reported	Sigmoid colon	1442	25890	Adenocarcinoma, NOS	no	2011	No	7th	T3	1940-03-01	N0	M0	not reported	cbebb7f5-b576-56ce-843e-05cd3cfe8414	C18.7	Sigmoid colon	Not Reported	not reported	Not Reported	14d2f3a2-a087-56b1-901a-3a37b320fd11	white
TCGA-A6-2674-01A-02R-A278-07	TCGA-A6-2674	TCGA-A6-2674-01A	TP	Primary solid Tumor	TCGA-A6-2674-01A	1	Primary	8aca008c-f55a-420a-82c7-acd2cca77d85	TCGA-A6-2674	Primary Tumor	NA	Solid Tissue	released	FALSE	Tumor	Unknown	Not Reported	NA	NA	0.6	8d42a0be-1995-4889-94db-eef5528759c0	0.3	0.8	No	Stage IV	0	list(days_to_treatment_end = c(NA, NA), days_to_treatment_start = c(NA, NA), treatment_id = c("5b3df2f3-d2d0-57ac-b8b8-6c8cb4db6a74", "92289391-2c86-52d0-9b25-b56c02cc6e83"), submitter_id = c("TCGA-A6-2674_treatment_1", "TCGA-A6-2674_treatment"), treatment_type = c("Pharmaceutical Therapy, NOS", "Radiation Therapy, NOS"), regimen_or_line_of_therapy = c(NA, NA), treatment_effect = c(NA, NA), thera…	not reported	Sigmoid colon	1331	26292	Mucinous adenocarcinoma	no	2009	No	6th	T3	1980-03-01	N2	M1	not reported	268702d9-6a0c-5b3d-ad95-8c2a73101503	C18.7	Sigmoid colon	Not Reported	not reported	Not Reported	269200d1-f41b-5369-ba40-8a4bb4e05e3b	white
TCGA-A6-2674-01A-02R-0821-07	TCGA-A6-2674	TCGA-A6-2674-01A	TP	Primary solid Tumor	TCGA-A6-2674-01A	1	Primary	8aca008c-f55a-420a-82c7-acd2cca77d85	TCGA-A6-2674	Primary Tumor	NA	Solid Tissue	released	FALSE	Tumor	Unknown	Not Reported	NA	NA	0.6	8d42a0be-1995-4889-94db-eef5528759c0	0.3	0.8	No	Stage IV	0	list(days_to_treatment_end = c(NA, NA), days_to_treatment_start = c(NA, NA), treatment_id = c("5b3df2f3-d2d0-57ac-b8b8-6c8cb4db6a74", "92289391-2c86-52d0-9b25-b56c02cc6e83"), submitter_id = c("TCGA-A6-2674_treatment_1", "TCGA-A6-2674_treatment"), treatment_type = c("Pharmaceutical Therapy, NOS", "Radiation Therapy, NOS"), regimen_or_line_of_therapy = c(NA, NA), treatment_effect = c(NA, NA), thera…	not reported	Sigmoid colon	1331	26292	Mucinous adenocarcinoma	no	2009	No	6th	T3	1980-03-01	N2	M1	not reported	268702d9-6a0c-5b3d-ad95-8c2a73101503	C18.7	Sigmoid colon	Not Reported	not reported	Not Reported	269200d1-f41b-5369-ba40-8a4bb4e05e3b	white
TCGA-A6-2674-01B-04R-A277-07	TCGA-A6-2674	TCGA-A6-2674-01B	TP	Primary solid Tumor	TCGA-A6-2674-01B	1	Primary	be4fdd24-ebf2-460e-9ba7-402d3b840c64	TCGA-A6-2674	Primary Tumor	FALSE	Solid Tissue	released	TRUE	Tumor	FFPE	Not Reported	979	NA	NA	8d42a0be-1995-4889-94db-eef5528759c0	NA	NA	No	Stage IV	0	list(days_to_treatment_end = c(NA, NA), days_to_treatment_start = c(NA, NA), treatment_id = c("5b3df2f3-d2d0-57ac-b8b8-6c8cb4db6a74", "92289391-2c86-52d0-9b25-b56c02cc6e83"), submitter_id = c("TCGA-A6-2674_treatment_1", "TCGA-A6-2674_treatment"), treatment_type = c("Pharmaceutical Therapy, NOS", "Radiation Therapy, NOS"), regimen_or_line_of_therapy = c(NA, NA), treatment_effect = c(NA, NA), thera…	not reported	Sigmoid colon	1331	26292	Mucinous adenocarcinoma	no	2009	No	6th	T3	1980-03-01	N2	M1	not reported	268702d9-6a0c-5b3d-ad95-8c2a73101503	C18.7	Sigmoid colon	Not Reported	not reported	Not Reported	269200d1-f41b-5369-ba40-8a4bb4e05e3b	white
TCGA-AA-A01T-01A-21R-A16W-07	TCGA-AA-A01T	TCGA-AA-A01T-01A	TP	Primary solid Tumor	TCGA-AA-A01T-01A	1	Primary	bfc99c6d-7791-4037-9c74-a74be68e616a	TCGA-AA-A01T	Primary Tumor	FALSE	Solid Tissue	released	FALSE	Tumor	Unknown	Not Reported	2152	270	NA	7DBAA2D8-44FA-4726-94DC-3AFCFBFF15D5	NA	NA	No	Stage III	0	list(days_to_treatment_end = c(NA, NA), days_to_treatment_start = c(NA, NA), treatment_id = c("b65850bb-1154-50f5-a2dc-324e99b8b6f3", "c73cc96e-65b6-58ec-a5f2-852af1445e22"), submitter_id = c("TCGA-AA-A01T_treatment_1", "TCGA-AA-A01T_treatment"), treatment_type = c("Pharmaceutical Therapy, NOS", "Radiation Therapy, NOS"), regimen_or_line_of_therapy = c(NA, NA), treatment_effect = c(NA, NA), thera…	not reported	Sigmoid colon	1005	23192	Adenocarcinoma, NOS	no	2004	No	5th	T3	1940-03-01	N1	M0	not reported	c5bd6379-4928-57e0-9532-996f77045c13	C18.7	Sigmoid colon	Not Reported	not reported	Not Reported	65a2ebfc-cf01-57b6-b346-071d990ebb0e	not reported
TCGA-G4-6315-01A-11R-1723-07	TCGA-G4-6315	TCGA-G4-6315-01A	TP	Primary solid Tumor	TCGA-G4-6315-01A	1	Primary	c525d1fb-ca9e-4c69-97d9-0d00041edb01	TCGA-G4-6315	Primary Tumor	NA	Solid Tissue	released	FALSE	Tumor	Unknown	Not Reported	NA	NA	1	e940ab4d-6ff9-4bd2-abcf-fbfa40ca9f39	0.7	1.7	No	Stage IV	0	list(treatment_intent_type = c(NA, NA), updated_datetime = c("2019-07-31T18:37:06.518994-05:00", "2019-07-31T18:37:06.518994-05:00"), treatment_id = c("1be8681d-df18-510a-b8a8-8d9280df8efc", "c489c9eb-bd72-573d-9a83-8f96a7857c82"), submitter_id = c("TCGA-G4-6315_treatment", "TCGA-G4-6315_treatment_1"), treatment_type = c("Radiation Therapy, NOS", "Pharmaceutical Therapy, NOS"), state = c("release…	not reported	Descending colon	1883	24174	Adenocarcinoma, NOS	no	2008	No	6th	T3	1940-03-01	N1	M1	not reported	91d21a44-bb9b-5352-ba3a-2b1982d827b4	C18.6	Descending colon	Not Reported	not reported	Not Reported	6cfb6dc3-0bf9-59cf-af4a-64c73934666a	white
TCGA-G4-6320-01A-11R-1723-07	TCGA-G4-6320	TCGA-G4-6320-01A	TP	Primary solid Tumor	TCGA-G4-6320-01A	1	Primary	40dd997d-cfdf-46f9-9c0a-f238b8d6f758	TCGA-G4-6320	Primary Tumor	NA	Solid Tissue	released	FALSE	Tumor	Unknown	Not Reported	NA	NA	1.1	c0c529da-076f-4843-8dfe-cadc1b651a71	0.3	2	No	Stage III	0	list(treatment_intent_type = c(NA, NA), updated_datetime = c("2019-07-31T18:38:26.872409-05:00", "2019-07-31T18:38:26.872409-05:00"), treatment_id = c("858d3247-b46f-5e66-a973-7865d156bd1b", "a23b351b-9561-5c77-b2ae-f9eec652bd9a"), submitter_id = c("TCGA-G4-6320_treatment", "TCGA-G4-6320_treatment_1"), treatment_type = c("Radiation Therapy, NOS", "Pharmaceutical Therapy, NOS"), state = c("release…	not reported	Hepatic flexure of colon	804	26840	Adenocarcinoma, NOS	no	2009	No	6th	T3	1940-03-01	N1	MX	not reported	6409d6d5-6ed4-5f24-bbf5-293c5c2119f5	C18.3	Hepatic flexure of colon	Not Reported	not reported	Not Reported	f2f91ab8-0ef7-54b1-82c0-76d647e687ab	white
TCGA-DM-A280-01A-12R-A16W-07	TCGA-DM-A280	TCGA-DM-A280-01A	TP	Primary solid Tumor	TCGA-DM-A280-01A	1	Primary	e0766706-baf6-4009-833e-6c3b0b9543ce	TCGA-DM-A280	Primary Tumor	FALSE	Solid Tissue	released	FALSE	Tumor	Unknown	Not Reported	4563	180	NA	EDE93B1A-2535-4D4B-9995-DD050CA8A5D7	NA	NA	No	Stage IIA	0	list(days_to_treatment_end = c(NA, NA), days_to_treatment_start = c(NA, NA), treatment_id = c("1d7779ec-32c7-5087-8124-2dd10966c663", "ae58d843-5aa1-511c-bcb7-1f3ef012a2dc"), submitter_id = c("TCGA-DM-A280_treatment_1", "TCGA-DM-A280_treatment"), treatment_type = c("Pharmaceutical Therapy, NOS", "Radiation Therapy, NOS"), regimen_or_line_of_therapy = c(NA, NA), treatment_effect = c(NA, NA), thera…	not reported	Ascending colon	236	25649	Mucinous adenocarcinoma	no	1998	No	6th	T3	1980-03-01	N0	M0	not reported	c790cea4-9f04-5243-a617-c58c5dfb319f	C18.2	Ascending colon	Not Reported	not reported	Not Reported	a969f329-8549-5973-9351-cf434572c4a0	white
TCGA-QG-A5YV-01A-11R-A28H-07	TCGA-QG-A5YV	TCGA-QG-A5YV-01A	TP	Primary solid Tumor	TCGA-QG-A5YV-01A	1	Primary	69ef3e70-5d7a-4e30-abde-0f9f76ea3141	TCGA-QG-A5YV	Primary Tumor	TRUE	Solid Tissue	released	FALSE	Tumor	OCT	Not Reported	714	220	NA	DCBDBBD7-E408-4E5F-AF2B-95F4D01C7D5C	NA	NA	No	Stage IIIC	0	list(treatment_intent_type = c(NA, NA), updated_datetime = c("2019-07-31T15:26:52.331591-05:00", "2019-07-31T15:26:52.331591-05:00"), treatment_id = c("deb10c46-927d-5f08-91c2-e15a2fc847ce", "f2bb1ea1-a82f-5606-9c55-0b31f58dfad4"), submitter_id = c("TCGA-QG-A5YV_treatment", "TCGA-QG-A5YV_treatment_1"), treatment_type = c("Radiation Therapy, NOS", "Pharmaceutical Therapy, NOS"), state = c("release…	not reported	Sigmoid colon	1301	23499	Adenocarcinoma, NOS	no	2011	No	7th	T4b	1940-03-01	N1a	MX	not reported	b36a2c9a-a9c7-5d4a-816c-7c688bf79b37	C18.7	Sigmoid colon	Not Reported	not reported	Not Reported	86865fb3-043a-537a-a25d-71c967fea11d	black or african american
TCGA-A6-2675-01A-02R-1723-07	TCGA-A6-2675	TCGA-A6-2675-01A	TP	Primary solid Tumor	TCGA-A6-2675-01A	1	Primary	7cc80938-e5a3-4bfb-a988-e4c876894bcf	TCGA-A6-2675	Primary Tumor	NA	Solid Tissue	released	FALSE	Tumor	Unknown	Not Reported	NA	NA	0.8	c9a27850-8295-4e69-ab9e-a9765650fcea	0.5	2	No	Stage IIA	0	list(days_to_treatment_end = c(NA, NA), days_to_treatment_start = c(NA, NA), treatment_id = c("95c46bfc-0f9f-53d5-846b-3fae9a1609ba", "b3be54c6-564e-5d3c-aa0e-1ad601b5bbc5"), submitter_id = c("TCGA-A6-2675_treatment_1", "TCGA-A6-2675_treatment"), treatment_type = c("Pharmaceutical Therapy, NOS", "Radiation Therapy, NOS"), regimen_or_line_of_therapy = c(NA, NA), treatment_effect = c(NA, NA), thera…	not reported	Sigmoid colon	1321	28813	Adenocarcinoma, NOS	no	2009	No	6th	T3	1940-03-01	N0	MX	not reported	730825f4-a364-56a2-878c-a19ec8b3b2ee	C18.7	Sigmoid colon	Not Reported	not reported	Not Reported	9a2795d9-82d7-578b-85eb-19acc4b60656	white
TCGA-AA-A00O-01A-02R-A089-07	TCGA-AA-A00O	TCGA-AA-A00O-01A	TP	Primary solid Tumor	TCGA-AA-A00O-01A	1	Primary	16acbdbc-a397-4318-b11a-244d7e1350e6	TCGA-AA-A00O	Primary Tumor	FALSE	Solid Tissue	released	FALSE	Tumor	Unknown	Not Reported	599	130	NA	D60FE415-7BE3-49B6-802C-EAF36A583E28	NA	NA	No	Stage IIIC	0	list(days_to_treatment_end = c(NA, NA), days_to_treatment_start = c(NA, NA), treatment_id = c("68c4580c-a12d-59c7-969c-46fccf381769", "d04b2b03-119d-5e18-bf1e-9bfcb97efa06"), submitter_id = c("TCGA-AA-A00O_treatment_1", "TCGA-AA-A00O_treatment"), treatment_type = c("Pharmaceutical Therapy, NOS", "Radiation Therapy, NOS"), regimen_or_line_of_therapy = c(NA, NA), treatment_effect = c(NA, NA), thera…	not reported	Sigmoid colon	822	30316	Adenocarcinoma, NOS	no	2008	No	6th	T3	1940-03-01	N2	M0	not reported	5294556a-13c8-5e63-9b3b-6ac0b429aa77	C18.7	Sigmoid colon	Not Reported	not reported	Not Reported	d4a3248f-a192-5d85-94a8-fc669d6608e5	not reported
TCGA-D5-6922-01A-11R-1928-07	TCGA-D5-6922	TCGA-D5-6922-01A	TP	Primary solid Tumor	TCGA-D5-6922-01A	1	Primary	0152ba53-d53b-4ec8-a256-3dcad8e8d2a3	TCGA-D5-6922	Primary Tumor	NA	Solid Tissue	released	FALSE	Tumor	Unknown	Not Reported	NA	NA	0.8	424d8ff7-23f7-4396-8747-f85a4c6e0a3e	0.6	1.1	No	Stage IIIA	0	list(treatment_intent_type = c(NA, NA), updated_datetime = c("2019-07-31T18:22:58.185643-05:00", "2019-07-31T18:22:58.185643-05:00"), treatment_id = c("43bb17d9-a92f-5e0f-8fc1-125d689f2c51", "aca2db20-e231-5625-a68a-1491628b8b1c"), submitter_id = c("TCGA-D5-6922_treatment", "TCGA-D5-6922_treatment_1"), treatment_type = c("Radiation Therapy, NOS", "Pharmaceutical Therapy, NOS"), state = c("release…	not reported	Sigmoid colon	308	27771	Adenocarcinoma, NOS	no	2011	No	7th	T3	1940-03-01	N1	M0	not reported	176aca34-635f-53f4-bae2-f29a21c0dbb6	C18.7	Sigmoid colon	Not Reported	not reported	Not Reported	ec8a40d5-19c5-5cde-8d91-bab535c3c40c	white
TCGA-5M-AAT4-01A-11R-A41B-07	TCGA-5M-AAT4	TCGA-5M-AAT4-01A	TP	Primary solid Tumor	TCGA-5M-AAT4-01A	1	Primary	7ce1f7c4-c7b2-4a2f-a3f1-b96bef4f6b63	TCGA-5M-AAT4	Primary Tumor	FALSE	Solid Tissue	released	FALSE	Tumor	Unknown	Not Reported	1778	90	NA	C0BABB5A-B0ED-42A6-A9D1-6B26843A375D	NA	NA	No	Stage IV	0	list(days_to_treatment_end = c(NA, NA), days_to_treatment_start = c(NA, NA), treatment_id = c("68488849-f72d-51a5-953b-65be3915cb9f", "88de00a5-45b9-5174-b453-869217d73ef2"), submitter_id = c("TCGA-5M-AAT4_treatment_1", "TCGA-5M-AAT4_treatment"), treatment_type = c("Pharmaceutical Therapy, NOS", "Radiation Therapy, NOS"), regimen_or_line_of_therapy = c(NA, NA), treatment_effect = c(NA, NA), thera…	not reported	Ascending colon	NA	27095	Adenocarcinoma, NOS	no	2009	No	6th	T3	1940-03-01	N0	M1b	not reported	166d8efb-b84a-583d-9a95-fbd3a6151feb	C18.2	Ascending colon	Not Reported	not reported	Not Reported	000e2e41-0628-5dc8-aa36-b0a1148605de	black or african american
TCGA-AA-A00E-01A-01R-A002-07	TCGA-AA-A00E	TCGA-AA-A00E-01A	TP	Primary solid Tumor	TCGA-AA-A00E-01A	1	Primary	729a801d-5238-4020-bbff-73eaaa3a36d0	TCGA-AA-A00E	Primary Tumor	FALSE	Solid Tissue	released	FALSE	Tumor	Unknown	Not Reported	843	310	NA	B999FAB8-FBF9-405F-9E6F-81A6E2204363	NA	NA	No	Stage IIA	0	list(days_to_treatment_end = c(NA, NA), days_to_treatment_start = c(NA, NA), treatment_id = c("6fd7dfe6-dbe0-5c99-8dde-609f1a43400d", "8b636ab6-9f98-57b9-8512-e0d078122de0"), submitter_id = c("TCGA-AA-A00E_treatment_1", "TCGA-AA-A00E_treatment"), treatment_type = c("Pharmaceutical Therapy, NOS", "Radiation Therapy, NOS"), regimen_or_line_of_therapy = c(NA, NA), treatment_effect = c(NA, NA), thera…	not reported	Ascending colon	913	23741	Adenocarcinoma, NOS	no	2007	No	6th	T3	1940-03-01	N0	M0	not reported	d0ad61da-8e28-515f-a724-c21a256dd18c	C18.2	Ascending colon	Not Reported	not reported	Not Reported	e316cf91-0f31-5aec-9fe7-32479bf68ef6	not reported
TCGA-AA-A01F-01A-01R-A002-07	TCGA-AA-A01F	TCGA-AA-A01F-01A	TP	Primary solid Tumor	TCGA-AA-A01F-01A	1	Primary	bfe81d9d-12ec-4296-a498-811b8a6305d1	TCGA-AA-A01F	Primary Tumor	FALSE	Solid Tissue	released	FALSE	Tumor	Unknown	Not Reported	204	270	NA	6D0B0431-B2C4-41BE-9270-654790FA3170	NA	NA	No	Stage IIIB	0	list(days_to_treatment_end = c(NA, NA), days_to_treatment_start = c(NA, NA), treatment_id = c("0b548bf8-3126-5567-874d-21b258718e18", "9497099e-c646-5bdc-a81b-d051d5febd6a"), submitter_id = c("TCGA-AA-A01F_treatment_1", "TCGA-AA-A01F_treatment"), treatment_type = c("Pharmaceutical Therapy, NOS", "Radiation Therapy, NOS"), regimen_or_line_of_therapy = c(NA, NA), treatment_effect = c(NA, NA), thera…	not reported	Sigmoid colon	974	26298	Adenocarcinoma, NOS	no	2009	No	6th	T3	1940-03-01	N1	M0	not reported	3c7ef8dd-b767-5793-a46e-4b8954de6186	C18.7	Sigmoid colon	Not Reported	not reported	Not Reported	617f44f5-229d-551f-b1fd-61f17c357e1a	not reported
TCGA-G4-6323-01A-11R-1723-07	TCGA-G4-6323	TCGA-G4-6323-01A	TP	Primary solid Tumor	TCGA-G4-6323-01A	1	Primary	b09f0a46-e2bb-49e7-b1a6-5d684cf9a47d	TCGA-G4-6323	Primary Tumor	NA	Solid Tissue	released	FALSE	Tumor	Unknown	Not Reported	NA	NA	0.6	895d1c1a-e173-4cd7-8170-b1d31aeef265	0.1	0.8	No	Stage IA	0	list(treatment_intent_type = c(NA, NA), updated_datetime = c("2019-07-31T18:23:04.516140-05:00", "2019-07-31T18:23:04.516140-05:00"), treatment_id = c("5ad2dfa2-1fe8-5c6c-9c01-2627723d7284", "c086ec3c-be56-5b3f-9f34-7a85e452cef7"), submitter_id = c("TCGA-G4-6323_treatment", "TCGA-G4-6323_treatment_1"), treatment_type = c("Radiation Therapy, NOS", "Pharmaceutical Therapy, NOS"), state = c("release…	not reported	Cecum	419	18334	Adenocarcinoma, NOS	no	2010	No	7th	Tis	1940-03-01	N0	MX	not reported	59a932d0-c0c0-5567-ad46-79db02c10df2	C18.0	Cecum	Not Reported	not reported	Not Reported	c55f4a9b-6621-53ef-a3ce-b7dec45a3b3a	black or african american
TCGA-AA-A01P-01A-21R-A083-07	TCGA-AA-A01P	TCGA-AA-A01P-01A	TP	Primary solid Tumor	TCGA-AA-A01P-01A	1	Primary	133c13de-6c6b-45e2-a611-a5c5a4aebaa6	TCGA-AA-A01P	Primary Tumor	FALSE	Solid Tissue	released	FALSE	Tumor	Unknown	Not Reported	2243	420	NA	8547AC20-9066-452B-BB3D-AF6618445A79	NA	NA	No	Stage III	0	list(days_to_treatment_end = c(NA, NA), days_to_treatment_start = c(NA, NA), treatment_id = c("8cd64a52-fc82-5a5c-b2ba-fe71de58b0e9", "ea77b7e7-dc5c-5624-bbc5-9a5717760048"), submitter_id = c("TCGA-AA-A01P_treatment_1", "TCGA-AA-A01P_treatment"), treatment_type = c("Pharmaceutical Therapy, NOS", "Radiation Therapy, NOS"), regimen_or_line_of_therapy = c(NA, NA), treatment_effect = c(NA, NA), thera…	not reported	Ascending colon	0	29554	Adenocarcinoma, NOS	no	2003	No	5th	T3	1940-03-01	N1	M0	not reported	4e76afdf-4d27-575c-9981-54cf863e9fe0	C18.2	Ascending colon	Not Reported	not reported	Not Reported	a51eaf05-3197-57a4-82be-e314b41b0430	not reported
TCGA-D5-6898-01A-11R-1928-07	TCGA-D5-6898	TCGA-D5-6898-01A	TP	Primary solid Tumor	TCGA-D5-6898-01A	1	Primary	1a8e2409-ca0b-4b53-8d28-df63f7942722	TCGA-D5-6898	Primary Tumor	NA	Solid Tissue	released	FALSE	Tumor	Unknown	Not Reported	NA	NA	0.9	dce0850f-677e-4b31-9d4b-d92d1bfbb41a	0.6	1.2	No	Stage I	0	list(treatment_intent_type = c(NA, NA), updated_datetime = c("2019-07-31T18:25:29.412535-05:00", "2019-07-31T18:25:29.412535-05:00"), treatment_id = c("0d2f27be-1934-5219-a0ba-1793c64119d1", "8e4142db-a0eb-5ab6-acc2-0b551a916618"), submitter_id = c("TCGA-D5-6898_treatment", "TCGA-D5-6898_treatment_1"), treatment_type = c("Radiation Therapy, NOS", "Pharmaceutical Therapy, NOS"), state = c("release…	not reported	Colon, NOS	229	18874	Adenocarcinoma, NOS	no	2011	No	7th	T2	1940-03-01	N0	M0	not reported	c17555df-b5f9-5c6f-82c1-1462cf98d01d	C18.9	Colon, NOS	Not Reported	not reported	Not Reported	5be21495-80e4-57d9-be7f-872c2f619a2c	white
TCGA-AA-3851-01A-01R-1022-07	TCGA-AA-3851	TCGA-AA-3851-01A	TP	Primary solid Tumor	TCGA-AA-3851-01A	1	Primary	39637cb0-c222-48ce-8a6b-86cfab6a6ef4	TCGA-AA-3851	Primary Tumor	NA	Solid Tissue	released	FALSE	Tumor	Unknown	Not Reported	NA	NA	0.5	57bedee0-2765-45b0-8472-29e5464034d2	0.2	1	No	Stage IIA	0	list(treatment_intent_type = c(NA, NA), updated_datetime = c("2019-07-31T18:24:35.348656-05:00", "2019-07-31T18:24:35.348656-05:00"), treatment_id = c("5b7db956-4654-5d90-9f54-a1e93ca8a23b", "e0a57900-1b2b-57e1-bef0-fbe171ce75ae"), submitter_id = c("TCGA-AA-3851_treatment", "TCGA-AA-3851_treatment_1"), treatment_type = c("Radiation Therapy, NOS", "Pharmaceutical Therapy, NOS"), state = c("release…	not reported	Colon, NOS	1006	27090	Adenocarcinoma, NOS	no	2009	No	6th	T3	1940-03-01	N0	M0	not reported	0d6e956f-ff58-5fa5-a154-0a6ab36652eb	C18.9	Colon, NOS	Not Reported	not reported	Not Reported	4a2b75eb-227e-5c98-87de-1bfdedff6fd4	not reported
TCGA-A6-A5ZU-01A-11R-A28H-07	TCGA-A6-A5ZU	TCGA-A6-A5ZU-01A	TP	Primary solid Tumor	TCGA-A6-A5ZU-01A	1	Primary	180853ab-cdf4-431a-a88f-9bdf0602a3a9	TCGA-A6-A5ZU	Primary Tumor	FALSE	Solid Tissue	released	FALSE	Tumor	Unknown	Not Reported	50	480	NA	3E30630A-1BAB-480C-9C75-13E828907266	NA	NA	No	Stage IIIB	0	list(treatment_intent_type = c(NA, NA), updated_datetime = c("2019-07-31T18:27:50.045973-05:00", "2019-07-31T18:27:50.045973-05:00"), treatment_id = c("56da4b98-29dc-51a7-a31e-08e7fa71758c", "fcc43e2e-159d-54b0-8bf5-fb4d9cf07ae0"), submitter_id = c("TCGA-A6-A5ZU_treatment", "TCGA-A6-A5ZU_treatment_1"), treatment_type = c("Radiation Therapy, NOS", "Pharmaceutical Therapy, NOS"), state = c("release…	not reported	Transverse colon	293	21554	Adenocarcinoma, NOS	no	2013	No	7th	T3	1940-03-01	N1	M0	not reported	e9157d8c-81b8-5557-a032-aa104bd60da5	C18.4	Transverse colon	Not Reported	not reported	Not Reported	cc31b383-4028-5a63-8631-ad0973220d61	black or african american
TCGA-AA-3548-01A-01R-1873-07	TCGA-AA-3548	TCGA-AA-3548-01A	TP	Primary solid Tumor	TCGA-AA-3548-01A	1	Primary	633afc4c-4a35-420e-9ce6-ff4670e28395	TCGA-AA-3548	Primary Tumor	NA	Solid Tissue	released	FALSE	Tumor	Unknown	Not Reported	NA	NA	0.9	d2b49072-6158-48ae-8c9b-1f0ba0d2660a	0.3	1.3	No	Stage IIIC	0	list(treatment_intent_type = c(NA, NA), updated_datetime = c("2019-07-31T18:26:10.914803-05:00", "2019-07-31T18:26:10.914803-05:00"), treatment_id = c("5be25f37-18e4-5278-8a7d-e754c4670e19", "6297fabc-0716-53b0-a049-984025b82bec"), submitter_id = c("TCGA-AA-3548_treatment", "TCGA-AA-3548_treatment_1"), treatment_type = c("Radiation Therapy, NOS", "Pharmaceutical Therapy, NOS"), state = c("release…	not reported	Colon, NOS	1034	26175	Adenocarcinoma, NOS	no	2008	No	6th	T3	1940-03-01	N2	M0	not reported	41f0e4ee-f424-507d-9864-bb2cdc80caee	C18.9	Colon, NOS	Not Reported	not reported	Not Reported	78aa0f72-39f7-5f65-bead-e2a0f065cbb7	not reported
TCGA-CM-5864-01A-01R-1653-07	TCGA-CM-5864	TCGA-CM-5864-01A	TP	Primary solid Tumor	TCGA-CM-5864-01A	1	Primary	a81e2e72-e4ef-4a72-8338-3e234fe412ff	TCGA-CM-5864	Primary Tumor	NA	Solid Tissue	released	FALSE	Tumor	Unknown	Not Reported	NA	NA	1.5	0fc4d13c-efcf-413f-a922-0e88089fa055	0.6	2	No	Stage I	0	list(days_to_treatment_end = c(NA, NA), days_to_treatment_start = c(NA, NA), treatment_id = c("985d0fd5-ca66-567a-a33b-705bbba8416e", "bb90e248-3295-57b1-ae49-cf3211ff33b4"), submitter_id = c("TCGA-CM-5864_treatment_1", "TCGA-CM-5864_treatment"), treatment_type = c("Pharmaceutical Therapy, NOS", "Radiation Therapy, NOS"), regimen_or_line_of_therapy = c(NA, NA), treatment_effect = c(NA, NA), thera…	not reported	Cecum	457	22219	Adenocarcinoma, NOS	no	2010	No	7th	T2	1940-03-01	N0	M0	not reported	e08d5194-054d-5f61-bad5-43ffd4caa48a	C18.0	Cecum	Not Reported	not reported	Not Reported	ddabd3a8-c551-53d2-bced-7dfb17634db6	white
TCGA-AM-5821-01A-01R-1653-07	TCGA-AM-5821	TCGA-AM-5821-01A	TP	Primary solid Tumor	TCGA-AM-5821-01A	1	Primary	16619d78-3748-466d-a194-ea21fd8fb54c	TCGA-AM-5821	Primary Tumor	NA	Solid Tissue	released	FALSE	Tumor	Unknown	Not Reported	NA	NA	0.8	5ba47e48-c3f0-484b-aab5-23c75cf0cea4	0.6	0.9	No	Stage IIA	0	list(days_to_treatment_end = c(NA, NA), days_to_treatment_start = c(NA, NA), treatment_id = c("def18efd-836d-5fc0-8dd6-59d90f781440", "e58c1e84-77d7-5534-a9c5-af1e91b228a1"), submitter_id = c("TCGA-AM-5821_treatment_1", "TCGA-AM-5821_treatment"), treatment_type = c("Pharmaceutical Therapy, NOS", "Radiation Therapy, NOS"), regimen_or_line_of_therapy = c(NA, NA), treatment_effect = c(NA, NA), thera…	not reported	Sigmoid colon	28	24903	Adenocarcinoma, NOS	no	2010	No	7th	T3	1940-03-01	N0	M0	not reported	58b7c032-e7e1-5a6c-a73f-1898ea0db3d1	C18.7	Sigmoid colon	Not Reported	not reported	Not Reported	f598a263-9996-533e-a22f-8fd6740a6c11	white
TCGA-5M-AAT5-01A-21R-A41B-07	TCGA-5M-AAT5	TCGA-5M-AAT5-01A	TP	Primary solid Tumor	TCGA-5M-AAT5-01A	1	Primary	1a552953-755f-430b-8556-a06cc82753d3	TCGA-5M-AAT5	Primary Tumor	FALSE	Solid Tissue	released	FALSE	Tumor	Unknown	Not Reported	NA	110	NA	AA3CF932-9666-4280-9F3E-5CFA523CEC4B	NA	NA	NA	NA	NA	NULL	NA	NA	NA	NA	NA	NA	NA	NA	NA	NA	NA	NA	NA	NA	NA	NA	NA	NA	NA	NA	NA	NA
TCGA-AA-3875-01A-01R-0905-07	TCGA-AA-3875	TCGA-AA-3875-01A	TP	Primary solid Tumor	TCGA-AA-3875-01A	1	Primary	5b5d5baf-0350-4053-9c24-a9ad0f3d06cc	TCGA-AA-3875	Primary Tumor	NA	Solid Tissue	released	FALSE	Tumor	Unknown	Not Reported	NA	NA	0.5	8e2d005b-0201-41ef-9118-15fa334b7cc7	0.5	0.7	No	Stage I	0	list(days_to_treatment_end = c(NA, NA), days_to_treatment_start = c(NA, NA), treatment_id = c("6c779f40-7031-549b-8d87-206cd394bf0d", "8fe82b6a-1b60-535a-b474-46e4c3f06697"), submitter_id = c("TCGA-AA-3875_treatment_1", "TCGA-AA-3875_treatment"), treatment_type = c("Pharmaceutical Therapy, NOS", "Radiation Therapy, NOS"), regimen_or_line_of_therapy = c(NA, NA), treatment_effect = c(NA, NA), thera…	not reported	Ascending colon	549	28640	Adenocarcinoma, NOS	no	2007	No	6th	T1	1940-03-01	N0	M0	not reported	0a2addcc-c767-5584-b773-ab048078e1d1	C18.2	Ascending colon	Not Reported	not reported	Not Reported	8baf51a8-429a-5c9e-8e34-1159618eb8b5	not reported
TCGA-G4-6297-01A-11R-1723-07	TCGA-G4-6297	TCGA-G4-6297-01A	TP	Primary solid Tumor	TCGA-G4-6297-01A	1	Primary	fe13b56a-9379-4a6f-ba76-3ea8aa5721ce	TCGA-G4-6297	Primary Tumor	NA	Solid Tissue	released	FALSE	Tumor	Unknown	Not Reported	NA	NA	1	9cb65ee5-2b85-49a4-a1fa-fe0da865d74e	0.2	1.1	No	Stage IV	0	list(days_to_treatment_end = c(NA, NA), days_to_treatment_start = c(NA, NA), treatment_id = c("28802f96-9bc1-532f-8b2b-b6699ddd11df", "5b0b567f-9b2a-5ea7-8575-99ff5953b74c"), submitter_id = c("TCGA-G4-6297_treatment_1", "TCGA-G4-6297_treatment"), treatment_type = c("Pharmaceutical Therapy, NOS", "Radiation Therapy, NOS"), regimen_or_line_of_therapy = c(NA, NA), treatment_effect = c(NA, NA), thera…	not reported	Cecum	2506	20103	Adenocarcinoma, NOS	no	2005	No	6th	T3	1940-03-01	N2	M1	not reported	89e6b80e-a799-518c-b79f-a0514a8346bd	C18.0	Cecum	Not Reported	not reported	Not Reported	12e6af80-b195-5f1f-854d-62a5643098e5	white
TCGA-NH-A8F7-06A-31R-A41B-07	TCGA-NH-A8F7	TCGA-NH-A8F7-06A	TM	Metastatic	TCGA-NH-A8F7-06A	6	Metastatic	b2c1658b-a03b-415c-b460-d316a7ef0a9b	TCGA-NH-A8F7	Metastatic	FALSE	Unknown	released	FALSE	Tumor	Unknown	Not Reported	48	210	NA	0E9A48BA-AAE0-4D88-90E1-141483700759	NA	NA	Yes	Stage IIA	0	list(days_to_treatment_end = c(NA, NA), days_to_treatment_start = c(NA, NA), treatment_id = c("9ecd6fbd-2362-5caa-a08d-bd869e82b5ba", "dfd5ac97-f73d-513f-9c0a-c86d31e08d3b"), submitter_id = c("TCGA-NH-A8F7_treatment_1", "TCGA-NH-A8F7_treatment"), treatment_type = c("Pharmaceutical Therapy, NOS", "Radiation Therapy, NOS"), regimen_or_line_of_therapy = c(NA, NA), treatment_effect = c(NA, NA), thera…	not reported	Sigmoid colon	543	19535	Adenocarcinoma, NOS	no	2013	No	7th	T3	1940-03-01	N0	MX	not reported	4689c168-6a0b-5c0d-bdc8-73dfbc3315ad	C18.7	Sigmoid colon	Not Reported	not reported	Not Reported	46800644-166c-58f4-aad9-b6392526af8b	black or african american
TCGA-DM-A1HA-01A-11R-A155-07	TCGA-DM-A1HA	TCGA-DM-A1HA-01A	TP	Primary solid Tumor	TCGA-DM-A1HA-01A	1	Primary	baa29aee-e36f-417a-9f72-b70d9c8d47ed	TCGA-DM-A1HA	Primary Tumor	FALSE	Solid Tissue	released	FALSE	Tumor	Unknown	Not Reported	3902	120	NA	9E26E5F5-0FD1-4045-87F6-3C1362F5DF84	NA	NA	No	Stage IIIC	0	list(treatment_intent_type = c(NA, NA), updated_datetime = c("2019-07-31T18:28:44.110121-05:00", "2019-07-31T18:28:44.110121-05:00"), treatment_id = c("13886958-2f36-5d65-b643-1c5d09dbcc14", "b66cf5c7-bf41-5e99-b857-45a575ab4352"), submitter_id = c("TCGA-DM-A1HA_treatment", "TCGA-DM-A1HA_treatment_1"), treatment_type = c("Radiation Therapy, NOS", "Pharmaceutical Therapy, NOS"), state = c("release…	not reported	Ascending colon	2600	30272	Adenocarcinoma, NOS	no	2000	No	NA	T3	1940-03-01	N2	M0	not reported	9068fce7-f3d2-5ea4-b4a4-d534d22238d0	C18.2	Ascending colon	Not Reported	not reported	Not Reported	2d09e973-fc7f-5f36-8913-3a6a26dbeb04	white
TCGA-AA-3494-01A-01R-1410-07	TCGA-AA-3494	TCGA-AA-3494-01A	TP	Primary solid Tumor	TCGA-AA-3494-01A	1	Primary	f409f2bd-ffb1-4c13-a913-5cf348542135	TCGA-AA-3494	Primary Tumor	NA	Solid Tissue	released	FALSE	Tumor	Unknown	Not Reported	NA	NA	0.4	ee6b348b-b4c2-41d3-923d-741c30766ed9	0.3	0.4	No	Stage IV	0	list(treatment_intent_type = c(NA, NA), updated_datetime = c("2019-07-31T18:30:04.027219-05:00", "2019-07-31T18:30:04.027219-05:00"), treatment_id = c("2a7f7f1f-024e-5776-bec1-143d53754a3f", "e0604fdc-38a9-5439-9896-282c8dbd6521"), submitter_id = c("TCGA-AA-3494_treatment", "TCGA-AA-3494_treatment_1"), treatment_type = c("Radiation Therapy, NOS", "Pharmaceutical Therapy, NOS"), state = c("release…	not reported	Colon, NOS	31	20089	Adenocarcinoma, NOS	no	2002	No	5th	T3	1940-03-01	N0	M1	not reported	842f46a5-c93c-5aaf-bf61-b776c834bd82	C18.9	Colon, NOS	Not Reported	not reported	Not Reported	d431a2e7-4338-5bc4-ad2d-d23d88f6bd45	not reported
TCGA-AA-3852-01A-01R-0905-07	TCGA-AA-3852	TCGA-AA-3852-01A	TP	Primary solid Tumor	TCGA-AA-3852-01A	1	Primary	37dafbf4-edb7-4c00-9007-36cb0f9299f1	TCGA-AA-3852	Primary Tumor	NA	Solid Tissue	released	FALSE	Tumor	Unknown	Not Reported	NA	NA	0.8	27e4a994-74c4-47ab-8f7c-00f2c468f3ef	0.4	1	No	Stage IIA	0	list(days_to_treatment_end = c(NA, NA), days_to_treatment_start = c(NA, NA), treatment_id = c("6f04f421-7945-5c41-8bac-1ffcca786ab4", "cf640ec9-1113-5c55-864e-72b0edd81a35"), submitter_id = c("TCGA-AA-3852_treatment_1", "TCGA-AA-3852_treatment"), treatment_type = c("Pharmaceutical Therapy, NOS", "Radiation Therapy, NOS"), regimen_or_line_of_therapy = c(NA, NA), treatment_effect = c(NA, NA), thera…	not reported	Colon, NOS	NA	32203	Mucinous adenocarcinoma	no	2009	No	6th	T3	1980-03-01	N0	M0	not reported	a411f0f1-167f-56ff-baf6-f8e45319a6cc	C18.9	Colon, NOS	Not Reported	not reported	Not Reported	9b5dbee4-6214-565f-96f6-97fbbdca93be	not reported
TCGA-AA-A02R-01A-01R-A00A-07	TCGA-AA-A02R	TCGA-AA-A02R-01A	TP	Primary solid Tumor	TCGA-AA-A02R-01A	1	Primary	197245f6-a310-4af4-9231-0afefc547ecd	TCGA-AA-A02R	Primary Tumor	FALSE	Solid Tissue	released	FALSE	Tumor	Unknown	Not Reported	1220	1000	NA	11E660AD-07D5-4996-A054-5F55D68AB793	NA	NA	No	Stage IIA	0	list(treatment_intent_type = c(NA, NA), updated_datetime = c("2019-07-31T18:31:00.951174-05:00", "2019-07-31T18:31:00.951174-05:00"), treatment_id = c("8bd5b94b-11c8-581c-8de7-b0b52ab54a6e", "98f1c95f-a595-50f8-bb35-51bcb3df2711"), submitter_id = c("TCGA-AA-A02R_treatment", "TCGA-AA-A02R_treatment_1"), treatment_type = c("Radiation Therapy, NOS", "Pharmaceutical Therapy, NOS"), state = c("release…	not reported	Cecum	NA	30834	Adenocarcinoma, NOS	no	2006	No	6th	T3	1940-03-01	N0	M0	not reported	4907ce6c-5a38-570b-afe8-46923c835176	C18.0	Cecum	Not Reported	not reported	Not Reported	5c3ea102-bd65-5367-9e42-73d4157b69c5	not reported
TCGA-G4-6302-01A-11R-1723-07	TCGA-G4-6302	TCGA-G4-6302-01A	TP	Primary solid Tumor	TCGA-G4-6302-01A	1	Primary	7b8ece19-62ea-47d9-8541-06e232b4fc51	TCGA-G4-6302	Primary Tumor	NA	Solid Tissue	released	FALSE	Tumor	Unknown	Not Reported	NA	NA	0.9	04aff74d-07d3-4453-8d97-88af7d64d787	0.5	1.5	No	Stage IIA	0	list(treatment_intent_type = c(NA, NA), updated_datetime = c("2019-07-31T18:30:27.889946-05:00", "2019-07-31T18:30:27.889946-05:00"), treatment_id = c("9a80f8e7-3060-5c23-922e-d2a039397bb3", "d8d9a70f-657f-57d9-8f65-076cd055476f"), submitter_id = c("TCGA-G4-6302_treatment", "TCGA-G4-6302_treatment_1"), treatment_type = c("Radiation Therapy, NOS", "Pharmaceutical Therapy, NOS"), state = c("release…	not reported	Cecum	0	32872	Mucinous adenocarcinoma	no	2006	No	6th	T3	1980-03-01	N0	M0	not reported	4d824623-649b-532f-bee5-d404b1aa2289	C18.0	Cecum	Not Reported	not reported	Not Reported	a97c66a1-f5d5-5644-af39-f7497b2a77fc	white
TCGA-DM-A28E-01A-11R-A32Y-07	TCGA-DM-A28E	TCGA-DM-A28E-01A	TP	Primary solid Tumor	TCGA-DM-A28E-01A	1	Primary	1daeeee4-4980-4424-b31a-2f6a8e7d4e55	TCGA-DM-A28E	Primary Tumor	FALSE	Solid Tissue	released	FALSE	Tumor	Unknown	Not Reported	3454	140	NA	6BA78869-CE10-4755-82A8-9096731A069C	NA	NA	No	Stage IIA	0	list(treatment_intent_type = c(NA, NA), updated_datetime = c("2019-07-31T18:31:57.851279-05:00", "2019-07-31T18:31:57.851279-05:00"), treatment_id = c("b110ab71-f0a4-5def-a627-1893d474d1c7", "d120ec36-388f-502d-912c-8f47ff3d89f0"), submitter_id = c("TCGA-DM-A28E_treatment", "TCGA-DM-A28E_treatment_1"), treatment_type = c("Radiation Therapy, NOS", "Pharmaceutical Therapy, NOS"), state = c("release…	not reported	Sigmoid colon	3648	26602	Adenocarcinoma, NOS	no	2001	No	6th	T3	1940-03-01	N0	M0	not reported	ae2c9a12-1c86-51ee-b51f-cb56cb5e9b82	C18.7	Sigmoid colon	Not Reported	not reported	Not Reported	bd60eb7d-f0cc-5c32-bd62-f0ccc2748476	white
TCGA-4N-A93T-01A-11R-A37K-07	TCGA-4N-A93T	TCGA-4N-A93T-01A	TP	Primary solid Tumor	TCGA-4N-A93T-01A	1	Primary	7904523e-e859-47b9-8ba0-c1a1363afa0c	TCGA-4N-A93T	Primary Tumor	TRUE	Solid Tissue	released	FALSE	Tumor	OCT	Not Reported	98	290	NA	5AEC5E5B-8EC4-4AA0-A195-612CFC38481F	NA	NA	No	Stage IIIB	0	list(treatment_intent_type = c(NA, NA), updated_datetime = c("2019-07-31T15:20:21.407951-05:00", "2019-07-31T15:20:21.407951-05:00"), treatment_id = c("41a84a30-1a47-5e41-a502-b8c75272a662", "54d1059d-f94a-5190-a4fb-2a4db64d4107"), submitter_id = c("TCGA-4N-A93T_treatment", "TCGA-4N-A93T_treatment_1"), treatment_type = c("Radiation Therapy, NOS", "Pharmaceutical Therapy, NOS"), state = c("release…	not reported	Ascending colon	146	24523	Adenocarcinoma, NOS	no	2013	No	7th	T4a	1940-03-01	N1b	M0	not reported	1ff8c9c9-ea6c-51d6-897b-306ee9c8aae0	C18.2	Ascending colon	Not Reported	not reported	Not Reported	919fa253-8b65-59fa-988f-944c7434dc76	black or african american
TCGA-DM-A1D4-01A-21R-A155-07	TCGA-DM-A1D4	TCGA-DM-A1D4-01A	TP	Primary solid Tumor	TCGA-DM-A1D4-01A	1	Primary	49075fad-2d3b-4732-8d6f-7c61cbb76372	TCGA-DM-A1D4	Primary Tumor	FALSE	Solid Tissue	released	FALSE	Tumor	Unknown	Not Reported	4128	180	NA	98310DA6-E41D-4725-A634-D17B88A7CFE0	NA	NA	No	Stage IIA	0	list(days_to_treatment_end = c(NA, NA), days_to_treatment_start = c(NA, NA), treatment_id = c("0a45232f-9acc-5973-a6f4-9a523ea042f2", "2b788434-fef4-5391-be08-4494d81121f8"), submitter_id = c("TCGA-DM-A1D4_treatment_1", "TCGA-DM-A1D4_treatment"), treatment_type = c("Pharmaceutical Therapy, NOS", "Radiation Therapy, NOS"), regimen_or_line_of_therapy = c(NA, NA), treatment_effect = c(NA, NA), thera…	not reported	Cecum	2821	29403	Adenocarcinoma, NOS	no	1999	No	NA	T3	1940-03-01	N0	M0	not reported	fead98ec-33e6-50e1-b99a-7545e6325300	C18.0	Cecum	Not Reported	not reported	Not Reported	5d0a1a13-5b6b-5225-a999-70e2447da8bd	white
TCGA-A6-5662-11A-01R-1653-07	TCGA-A6-5662	TCGA-A6-5662-11A	NT	Solid Tissue Normal	TCGA-A6-5662-11A	11	Not Applicable	6c4dbbe4-7f58-4de2-9aaf-a6d87170870a	TCGA-A6-5662	Solid Tissue Normal	NA	Solid Tissue	released	FALSE	Normal	Unknown	Not Reported	NA	NA	1	NA	0.5	1	No	Stage IVA	0	list(days_to_treatment_end = c(NA, NA), days_to_treatment_start = c(NA, NA), treatment_id = c("52996cae-9675-5cb3-965f-a37231ad81b0", "8c4646ae-9012-5405-91ca-d41f3ad0973f"), submitter_id = c("TCGA-A6-5662_treatment_1", "TCGA-A6-5662_treatment"), treatment_type = c("Pharmaceutical Therapy, NOS", "Radiation Therapy, NOS"), regimen_or_line_of_therapy = c(NA, NA), treatment_effect = c(NA, NA), thera…	not reported	Splenic flexure of colon	718	16873	Adenocarcinoma, NOS	no	2010	No	NA	T3	1940-03-01	N2	M1	not reported	620ba2a2-9e69-5559-867b-82560e768dad	C18.5	Splenic flexure of colon	Not Reported	not reported	Not Reported	66b37bca-79b7-513a-a078-6f6d5a2e0814	white
TCGA-AA-A02Y-01A-43R-A32Y-07	TCGA-AA-A02Y	TCGA-AA-A02Y-01A	TP	Primary solid Tumor	TCGA-AA-A02Y-01A	1	Primary	8537633b-6426-4b66-a2a3-fa942eedf01b	TCGA-AA-A02Y	Primary Tumor	FALSE	Solid Tissue	released	FALSE	Tumor	Unknown	Not Reported	1128	490	NA	214F632B-B4EE-41CE-A008-B249A9E80269	NA	NA	No	Stage I	0	list(treatment_intent_type = c(NA, NA), updated_datetime = c("2019-07-31T18:33:44.432650-05:00", "2019-07-31T18:33:44.432650-05:00"), treatment_id = c("24206bfd-6b95-521c-a4f4-c379d48fa149", "559f0db8-7756-5add-8a7f-b1a0738a2616"), submitter_id = c("TCGA-AA-A02Y_treatment", "TCGA-AA-A02Y_treatment_1"), treatment_type = c("Radiation Therapy, NOS", "Pharmaceutical Therapy, NOS"), state = c("release…	not reported	Cecum	1216	26724	Adenocarcinoma, NOS	no	2007	No	6th	T2	1940-03-01	N0	M0	not reported	fdcd8dda-1d70-5ccb-b84f-b54428d94a44	C18.0	Cecum	Not Reported	not reported	Not Reported	5f5cfcc8-1c92-559c-aaa3-b8a531ec473d	not reported
TCGA-A6-6780-01A-11R-1839-07	TCGA-A6-6780	TCGA-A6-6780-01A	TP	Primary solid Tumor	TCGA-A6-6780-01A	1	Primary	a8635b10-cbf2-461b-b459-e82e2aec4589	TCGA-A6-6780	Primary Tumor	NA	Solid Tissue	released	FALSE	Tumor	Unknown	Not Reported	NA	NA	1	b3b3707c-e311-4a38-a8a3-e8f8bba675ad	0.4	1.4	No	Stage IIA	0	list(days_to_treatment_end = c(NA, NA), days_to_treatment_start = c(NA, NA), treatment_id = c("8451dd60-e25a-540a-bf9f-91bfed428d86", "ee40eb56-e74b-524a-ae65-63e6311705d1"), submitter_id = c("TCGA-A6-6780_treatment_1", "TCGA-A6-6780_treatment"), treatment_type = c("Pharmaceutical Therapy, NOS", "Radiation Therapy, NOS"), regimen_or_line_of_therapy = c(NA, NA), treatment_effect = c(NA, NA), thera…	not reported	Ascending colon	612	27250	Mucinous adenocarcinoma	no	2011	No	7th	T3	1980-03-01	N0	MX	not reported	ced60395-4b47-5c79-81d5-2660dda9b8d8	C18.2	Ascending colon	Not Reported	not reported	Not Reported	f57f02d3-903a-587e-b2c2-9f606fc93522	white
TCGA-D5-6538-01A-11R-1723-07	TCGA-D5-6538	TCGA-D5-6538-01A	TP	Primary solid Tumor	TCGA-D5-6538-01A	1	Primary	9eefa52f-0f0f-4eb0-9d9a-36bb1a1c4903	TCGA-D5-6538	Primary Tumor	NA	Solid Tissue	released	FALSE	Tumor	Unknown	Not Reported	NA	NA	0.8	092bf70b-2120-40ec-a98b-c72795d61660	0.6	1	No	Stage IIIB	0	list(treatment_intent_type = c(NA, NA), updated_datetime = c("2019-07-31T18:33:38.226930-05:00", "2019-07-31T18:33:38.226930-05:00"), treatment_id = c("1d2837c4-d04c-5842-8ff6-f32f3d885ef1", "8b206ff3-39fc-541b-9641-1ad67ef0b300"), submitter_id = c("TCGA-D5-6538_treatment", "TCGA-D5-6538_treatment_1"), treatment_type = c("Radiation Therapy, NOS", "Pharmaceutical Therapy, NOS"), state = c("release…	not reported	Hepatic flexure of colon	521	29194	Adenocarcinoma, NOS	no	2010	No	NA	T3	1940-03-01	N2	M0	not reported	a50224c5-748a-5811-af3e-920c10675178	C18.3	Hepatic flexure of colon	Not Reported	not reported	Not Reported	eccc302d-d684-5db9-988c-33783f50f422	white
TCGA-4T-AA8H-01A-11R-A41B-07	TCGA-4T-AA8H	TCGA-4T-AA8H-01A	TP	Primary solid Tumor	TCGA-4T-AA8H-01A	1	Primary	b7e4daef-b24b-45c0-8f9d-21bcf46d9c9a	TCGA-4T-AA8H	Primary Tumor	TRUE	Solid Tissue	released	FALSE	Tumor	OCT	Not Reported	107	110	NA	FAB79463-7351-4C25-9AEC-7B47486C7F54	NA	NA	No	Stage IIA	0	list(days_to_treatment_end = c(NA, NA), days_to_treatment_start = c(NA, NA), treatment_id = c("dc1d07dc-3969-5cee-b595-de5e68bb6af6", "e25b10e1-2774-51e3-90fd-df4c03d66a5a"), submitter_id = c("TCGA-4T-AA8H_treatment_1", "TCGA-4T-AA8H_treatment"), treatment_type = c("Pharmaceutical Therapy, NOS", "Radiation Therapy, NOS"), regimen_or_line_of_therapy = c(NA, NA), treatment_effect = c(NA, NA), thera…	not reported	Descending colon	385	15494	Mucinous adenocarcinoma	no	2013	No	7th	T3	1980-03-01	N0	MX	not reported	9c203708-a70d-59cc-8a6d-4163fc4f7645	C18.6	Descending colon	Not Reported	not reported	Not Reported	b3a0be81-1c0e-54cb-b7dd-ac21abcb2b47	black or african american
TCGA-AA-A01K-01A-01R-A00A-07	TCGA-AA-A01K	TCGA-AA-A01K-01A	TP	Primary solid Tumor	TCGA-AA-A01K-01A	1	Primary	9076c2ec-bc16-49a9-b9e4-da726de4f1f5	TCGA-AA-A01K	Primary Tumor	FALSE	Solid Tissue	released	FALSE	Tumor	Unknown	Not Reported	173	140	NA	0D66971E-D224-4536-A3BE-B138861D8E7D	NA	NA	No	Stage IIIC	0	list(treatment_intent_type = c(NA, NA), updated_datetime = c("2019-07-31T18:33:59.679235-05:00", "2019-07-31T18:33:59.679235-05:00"), treatment_id = c("37df7182-0e4c-5066-b781-480e3b0bd3fa", "b85c48e6-7381-5130-b42d-54ffe14bf0f9"), submitter_id = c("TCGA-AA-A01K_treatment", "TCGA-AA-A01K_treatment_1"), treatment_type = c("Radiation Therapy, NOS", "Pharmaceutical Therapy, NOS"), state = c("release…	not reported	Sigmoid colon	943	27029	Adenocarcinoma, NOS	no	2009	No	6th	T3	1940-03-01	N2	M0	not reported	157a7626-4402-56c7-9d4a-64dc79318045	C18.7	Sigmoid colon	Not Reported	not reported	Not Reported	b6271b0b-b135-52bb-bca3-b95905682205	not reported
TCGA-D5-6927-01A-21R-1928-07	TCGA-D5-6927	TCGA-D5-6927-01A	TP	Primary solid Tumor	TCGA-D5-6927-01A	1	Primary	c281d8eb-0aaf-409c-b8d1-5681c8dc27be	TCGA-D5-6927	Primary Tumor	NA	Solid Tissue	released	FALSE	Tumor	Unknown	Not Reported	NA	NA	0.9	c667b580-1814-4ef9-9b00-6803e665a94c	0.5	2.5	No	Stage IIA	0	list(days_to_treatment_end = c(NA, NA), days_to_treatment_start = c(NA, NA), treatment_id = c("6f822511-9cb6-5249-ba0f-9c80ac0f531d", "746625bf-ebe8-58ca-a1c9-552feda714d7"), submitter_id = c("TCGA-D5-6927_treatment_1", "TCGA-D5-6927_treatment"), treatment_type = c("Pharmaceutical Therapy, NOS", "Radiation Therapy, NOS"), regimen_or_line_of_therapy = c(NA, NA), treatment_effect = c(NA, NA), thera…	not reported	Sigmoid colon	287	12737	Adenocarcinoma, NOS	no	2011	No	7th	T3	1940-03-01	N0	M0	not reported	028ebc82-2bba-504b-85db-a1e824225244	C18.7	Sigmoid colon	Not Reported	not reported	Not Reported	49b68395-9290-5eb5-a898-3ba59384d599	white
TCGA-AA-3530-01A-01R-1022-07	TCGA-AA-3530	TCGA-AA-3530-01A	TP	Primary solid Tumor	TCGA-AA-3530-01A	1	Primary	63f1b937-80c9-4399-8544-550b15e9d035	TCGA-AA-3530	Primary Tumor	NA	Solid Tissue	released	FALSE	Tumor	Unknown	Not Reported	NA	NA	1	76035d5d-d2bb-4616-a9a2-5794a6f1373d	0.4	1.6	Not Reported	Stage I	0	list(treatment_intent_type = c(NA, NA), updated_datetime = c("2019-07-31T18:24:32.066469-05:00", "2019-07-31T18:24:32.066469-05:00"), treatment_id = c("6fa0c5e6-18a2-5d89-a8a2-11ab988ad8c5", "ddabffe9-f3e3-5a62-a31c-702e96786553"), submitter_id = c("TCGA-AA-3530_treatment", "TCGA-AA-3530_treatment_1"), treatment_type = c("Radiation Therapy, NOS", "Pharmaceutical Therapy, NOS"), state = c("release…	not reported	Colon, NOS	580	29402	Adenocarcinoma, NOS	yes	2007	No	6th	T2	1940-03-01	N0	M0	not reported	59bdc21a-274f-57c7-9198-1283cf91adeb	C18.2	Cecum	Not Reported	not reported	Not Reported	86c835d7-2733-57d9-8cc9-800ec8340991	not reported
TCGA-G4-6298-01A-11R-1723-07	TCGA-G4-6298	TCGA-G4-6298-01A	TP	Primary solid Tumor	TCGA-G4-6298-01A	1	Primary	83b624fe-acc8-4777-b606-e4cacdc11a82	TCGA-G4-6298	Primary Tumor	NA	Solid Tissue	released	FALSE	Tumor	Unknown	Not Reported	NA	NA	1	bf7b5bf6-9223-412a-b98f-5e89761c5c8a	1	3	Not Reported	Stage IIIB	0	list(days_to_treatment_end = c(NA, NA), days_to_treatment_start = c(NA, NA), treatment_id = c("125dd097-553a-5763-af5f-8732c8f09389", "9b34cc2a-df2d-5864-87dd-26a54f604da9"), submitter_id = c("TCGA-G4-6298_treatment_1", "TCGA-G4-6298_treatment"), treatment_type = c("Pharmaceutical Therapy, NOS", "Radiation Therapy, NOS"), regimen_or_line_of_therapy = c(NA, NA), treatment_effect = c(NA, NA), thera…	not reported	Cecum	NA	32872	Adenocarcinoma, NOS	yes	2005	No	6th	T4a	1940-03-01	N1	MX	not reported	b19761bd-495c-5939-a8bb-388abefca808	C18.0	Cecum	Not Reported	not reported	Not Reported	8f70423a-ece5-5881-a316-a250ada0bf10	black or african american
TCGA-A6-2677-01B-02R-A277-07	TCGA-A6-2677	TCGA-A6-2677-01B	TP	Primary solid Tumor	TCGA-A6-2677-01B	1	Primary	7554a84f-573c-4de9-9cda-e60674aea5fa	TCGA-A6-2677	Primary Tumor	FALSE	Solid Tissue	released	TRUE	Tumor	FFPE	Not Reported	952	NA	NA	7a3d9432-c992-4410-9044-cbc04e0dbece	NA	NA	Not Reported	Stage IIIC	0	list(days_to_treatment_end = c(NA, NA), days_to_treatment_start = c(NA, NA), treatment_id = c("081e273b-c2f6-5f1e-9266-5ae7296323f9", "9e66ff79-cb78-5cf6-866f-3f1111b9ec7a"), submitter_id = c("TCGA-A6-2677_treatment_1", "TCGA-A6-2677_treatment"), treatment_type = c("Pharmaceutical Therapy, NOS", "Radiation Therapy, NOS"), regimen_or_line_of_therapy = c(NA, NA), treatment_effect = c(NA, NA), thera…	not reported	Colon, NOS	541	25143	Adenocarcinoma, NOS	yes	2009	No	6th	T3	1940-03-01	N2	M0	not reported	1b22285c-890a-5cb1-8a8b-5434ef479f18	C18.2	Cecum	Not Reported	not reported	Not Reported	59056466-cb70-5bd0-a6c1-dfedeae44d9c	white
TCGA-A6-2677-01A-01R-A278-07	TCGA-A6-2677	TCGA-A6-2677-01A	TP	Primary solid Tumor	TCGA-A6-2677-01A	1	Primary	aec31f5d-022d-4833-b0ce-a9c5cb1f6650	TCGA-A6-2677	Primary Tumor	NA	Solid Tissue	released	FALSE	Tumor	Unknown	Not Reported	NA	NA	0.6	7a3d9432-c992-4410-9044-cbc04e0dbece	0.4	0.7	Not Reported	Stage IIIC	0	list(days_to_treatment_end = c(NA, NA), days_to_treatment_start = c(NA, NA), treatment_id = c("081e273b-c2f6-5f1e-9266-5ae7296323f9", "9e66ff79-cb78-5cf6-866f-3f1111b9ec7a"), submitter_id = c("TCGA-A6-2677_treatment_1", "TCGA-A6-2677_treatment"), treatment_type = c("Pharmaceutical Therapy, NOS", "Radiation Therapy, NOS"), regimen_or_line_of_therapy = c(NA, NA), treatment_effect = c(NA, NA), thera…	not reported	Colon, NOS	541	25143	Adenocarcinoma, NOS	yes	2009	No	6th	T3	1940-03-01	N2	M0	not reported	1b22285c-890a-5cb1-8a8b-5434ef479f18	C18.2	Cecum	Not Reported	not reported	Not Reported	59056466-cb70-5bd0-a6c1-dfedeae44d9c	white
TCGA-AA-3979-01A-01R-1022-07	TCGA-AA-3979	TCGA-AA-3979-01A	TP	Primary solid Tumor	TCGA-AA-3979-01A	1	Primary	4b13bcc0-d9ff-4616-b6cf-543a86881828	TCGA-AA-3979	Primary Tumor	NA	Solid Tissue	released	FALSE	Tumor	Unknown	Not Reported	NA	NA	0.5	3336e745-c20b-4cef-a6fd-8e6edc6f03a1	0.3	0.8	Not Reported	Stage IIA	0	list(days_to_treatment_end = c(NA, NA), days_to_treatment_start = c(NA, NA), treatment_id = c("a4cfb9dd-79fb-5ffb-8783-2397fd72108c", "e55018ca-adcf-5ee0-96d3-fe5992b65398"), submitter_id = c("TCGA-AA-3979_treatment_1", "TCGA-AA-3979_treatment"), treatment_type = c("Pharmaceutical Therapy, NOS", "Radiation Therapy, NOS"), regimen_or_line_of_therapy = c(NA, NA), treatment_effect = c(NA, NA), thera…	not reported	Sigmoid colon	730	30742	Adenocarcinoma, NOS	yes	2010	No	6th	T3	1940-03-01	N0	M0	not reported	3fa87b5c-f47a-5560-93fe-b72d717da436	C18.7	Sigmoid colon	Not Reported	not reported	Not Reported	0d999ed1-8854-51a5-9028-2b4bc8f1e005	not reported
TCGA-AA-3543-01A-01R-0826-07	TCGA-AA-3543	TCGA-AA-3543-01A	TP	Primary solid Tumor	TCGA-AA-3543-01A	1	Primary	a12a7d70-ce5f-4f6d-8ead-d17ba92431f5	TCGA-AA-3543	Primary Tumor	NA	Solid Tissue	released	FALSE	Tumor	Unknown	Not Reported	NA	NA	0.9	978056b3-ebf5-465a-ac1d-f470890298a7	0.3	1	Not Reported	Stage I	0	list(days_to_treatment_end = c(NA, NA), days_to_treatment_start = c(NA, NA), treatment_id = c("931e2b67-8e70-58db-b508-53213109d878", "9b0d1f06-34d1-5bb7-8ef1-14ac50e29756"), submitter_id = c("TCGA-AA-3543_treatment_1", "TCGA-AA-3543_treatment"), treatment_type = c("Pharmaceutical Therapy, NOS", "Radiation Therapy, NOS"), regimen_or_line_of_therapy = c(NA, NA), treatment_effect = c(NA, NA), thera…	not reported	Ascending colon	30	30772	Mucinous adenocarcinoma	yes	2008	Yes	6th	T2	1980-03-01	N0	M0	not reported	8b69a3e9-9d2b-5646-8efc-a7fcdde1f915	C18.2	Ascending colon	Not Reported	not reported	Not Reported	781fff13-5227-5907-b601-1ac4584cdea1	not reported
TCGA-AZ-4681-01A-01R-1410-07	TCGA-AZ-4681	TCGA-AZ-4681-01A	TP	Primary solid Tumor	TCGA-AZ-4681-01A	1	Primary	6171db74-fe5a-4495-8b6a-724be0cba79e	TCGA-AZ-4681	Primary Tumor	NA	Solid Tissue	released	FALSE	Tumor	Unknown	Not Reported	NA	NA	1	f93f6d03-ddbc-4399-b896-88ad92b285e6	0.2	1	No	Stage IIA	0	list(treatment_intent_type = c(NA, NA), updated_datetime = c("2019-07-31T18:41:56.760716-05:00", "2019-07-31T18:41:56.760716-05:00"), treatment_id = c("03aa2217-2248-57ff-ba02-4891fe6f4761", "fba7a852-b226-55da-87ee-5d5399775dcf"), submitter_id = c("TCGA-AZ-4681_treatment", "TCGA-AZ-4681_treatment_1"), treatment_type = c("Radiation Therapy, NOS", "Pharmaceutical Therapy, NOS"), state = c("release…	not reported	Ascending colon	3247	28906	Adenocarcinoma, NOS	no	2004	No	6th	T3	1940-03-01	N0	M0	not reported	325a0411-a6ff-599c-9815-d0a630fe18f8	C18.2	Ascending colon	Not Reported	not reported	Not Reported	d4b98e17-6e5b-50bf-b4f6-7eefcf387ca4	white
TCGA-AA-3662-01A-01R-1723-07	TCGA-AA-3662	TCGA-AA-3662-01A	TP	Primary solid Tumor	TCGA-AA-3662-01A	1	Primary	5f925197-6100-4594-9351-99c693981f43	TCGA-AA-3662	Primary Tumor	NA	Solid Tissue	released	FALSE	Tumor	Unknown	Not Reported	NA	NA	0.4	59a86f24-7500-467b-9e3f-9cbf5f872af7	0.2	0.9	Not Reported	Stage IV	0	list(days_to_treatment_end = c(NA, NA), days_to_treatment_start = c(NA, NA), treatment_id = c("68112583-82df-551e-8762-9757075f163d", "861dfd71-e5d7-5d02-a848-5f14fed6db94"), submitter_id = c("TCGA-AA-3662_treatment_1", "TCGA-AA-3662_treatment"), treatment_type = c("Pharmaceutical Therapy, NOS", "Radiation Therapy, NOS"), regimen_or_line_of_therapy = c(NA, NA), treatment_effect = c(NA, NA), thera…	not reported	Colon, NOS	184	29554	Adenocarcinoma, NOS	yes	2005	No	5th	T4	1940-03-01	N2	M1	not reported	e3ade95d-c128-5fae-8a6c-3ea820c30c4f	C18.9	Colon, NOS	Not Reported	not reported	Not Reported	607862c4-25f9-5dbd-90e0-93f7ba85e04d	not reported
TCGA-AA-3527-01A-01R-0821-07	TCGA-AA-3527	TCGA-AA-3527-01A	TP	Primary solid Tumor	TCGA-AA-3527-01A	1	Primary	be361e78-868c-4c27-aa2a-5492901aee55	TCGA-AA-3527	Primary Tumor	NA	Solid Tissue	released	FALSE	Tumor	Unknown	Not Reported	NA	NA	0.5	401e54d1-5d40-4533-8f5a-939ed4107655	0.2	0.8	Not Reported	Stage IIA	0	list(treatment_intent_type = c(NA, NA), updated_datetime = c("2019-07-31T18:25:18.135199-05:00", "2019-07-31T18:25:18.135199-05:00"), treatment_id = c("1ea9f8fb-7da3-5c39-9762-d5005686c1f5", "9f8d3f97-1d52-5fd6-8229-a4f7bf906922"), submitter_id = c("TCGA-AA-3527_treatment", "TCGA-AA-3527_treatment_1"), treatment_type = c("Radiation Therapy, NOS", "Pharmaceutical Therapy, NOS"), state = c("release…	not reported	Cecum	0	32871	Adenocarcinoma, NOS	yes	2007	No	6th	T3	1940-03-01	N0	M0	not reported	00547ae8-edc7-56f8-8830-a24fdc718a86	C18.2	Cecum	Not Reported	not reported	Not Reported	351e257a-1560-5cfb-8137-23c4967e134a	not reported
TCGA-AA-3867-01A-01R-1022-07	TCGA-AA-3867	TCGA-AA-3867-01A	TP	Primary solid Tumor	TCGA-AA-3867-01A	1	Primary	b0435a6b-e0e3-4959-a757-271c8238b748	TCGA-AA-3867	Primary Tumor	NA	Solid Tissue	released	FALSE	Tumor	Unknown	Not Reported	NA	NA	0.6	a2d8e110-7f5c-4b41-9084-405564f4bc9b	0.3	1	Not Reported	Stage IV	0	list(days_to_treatment_end = c(NA, NA), days_to_treatment_start = c(NA, NA), treatment_id = c("2b34ecec-82e7-5274-a4b9-57f6a0c0b021", "5a7bc83c-19da-5e10-988b-ea98c3479731"), submitter_id = c("TCGA-AA-3867_treatment_1", "TCGA-AA-3867_treatment"), treatment_type = c("Pharmaceutical Therapy, NOS", "Radiation Therapy, NOS"), regimen_or_line_of_therapy = c(NA, NA), treatment_effect = c(NA, NA), thera…	not reported	Sigmoid colon	731	27028	Adenocarcinoma, NOS	yes	2007	No	6th	T3	1940-03-01	N2	M1	not reported	60b256ac-8b86-5042-af26-744593617b67	C18.7	Sigmoid colon	Not Reported	not reported	Not Reported	230b24a5-a4a8-58b6-a1b3-6bd81dac627a	not reported
TCGA-AA-3525-11A-01R-A32Z-07	TCGA-AA-3525	TCGA-AA-3525-11A	NT	Solid Tissue Normal	TCGA-AA-3525-11A	11	Not Applicable	8660c709-e0af-489a-b20e-1157fe0072f4	TCGA-AA-3525	Solid Tissue Normal	NA	Solid Tissue	released	FALSE	Normal	Unknown	Not Reported	NA	NA	0.8	NA	0.4	1	Not Reported	Stage IIIB	0	list(days_to_treatment_end = c(NA, NA), days_to_treatment_start = c(NA, NA), treatment_id = c("afdd6411-e528-5071-bf08-d748bc6f8fcf", "c908071f-33bb-591f-9a5b-12d346b5ce21"), submitter_id = c("TCGA-AA-3525_treatment_1", "TCGA-AA-3525_treatment"), treatment_type = c("Pharmaceutical Therapy, NOS", "Radiation Therapy, NOS"), regimen_or_line_of_therapy = c(NA, NA), treatment_effect = c(NA, NA), thera…	not reported	Ascending colon	1	32871	Adenocarcinoma, NOS	yes	2007	No	6th	T3	1940-03-01	N1	M0	not reported	113cd34a-f9f5-56a9-b96d-2e63ccd8405b	C18.2	Ascending colon	Not Reported	not reported	Not Reported	b9c446c1-294c-5577-a9f1-bb3e5bd54d22	not reported
TCGA-AA-3688-01A-01R-0905-07	TCGA-AA-3688	TCGA-AA-3688-01A	TP	Primary solid Tumor	TCGA-AA-3688-01A	1	Primary	9e071449-9392-4384-b38f-26722d2d5c51	TCGA-AA-3688	Primary Tumor	NA	Solid Tissue	released	FALSE	Tumor	Unknown	Not Reported	NA	NA	0.6	311a81e8-9561-46c9-bd1a-d8c7e2a178d8	0.4	0.8	Not Reported	Stage IV	0	list(treatment_intent_type = c(NA, NA), updated_datetime = c("2019-07-31T18:25:59.026309-05:00", "2019-07-31T18:25:59.026309-05:00"), treatment_id = c("44a0a985-87cc-50b6-a41a-ef83b1e63c7a", "bf0d774f-17b4-54e9-8c5f-eadc094c74e6"), submitter_id = c("TCGA-AA-3688_treatment", "TCGA-AA-3688_treatment_1"), treatment_type = c("Radiation Therapy, NOS", "Pharmaceutical Therapy, NOS"), state = c("release…	not reported	Colon, NOS	578	29220	Adenocarcinoma, NOS	yes	2007	No	6th	T3	1940-03-01	N1	M1	not reported	1f3c8a5e-0aad-5c4d-a0ff-9696ba52bd9d	C18.9	Colon, NOS	Not Reported	not reported	Not Reported	003b9606-6b9b-546a-8100-632e3fc1c0ce	not reported
TCGA-G4-6628-01A-11R-1839-07	TCGA-G4-6628	TCGA-G4-6628-01A	TP	Primary solid Tumor	TCGA-G4-6628-01A	1	Primary	df310e3e-d633-4f03-af1c-861e453e22cc	TCGA-G4-6628	Primary Tumor	NA	Solid Tissue	released	FALSE	Tumor	Unknown	Not Reported	NA	NA	0.7	ccdb21ae-ab24-4afe-84b6-123b716f5c12	0.5	1	Not Reported	Stage I	0	list(days_to_treatment_end = c(NA, NA), days_to_treatment_start = c(NA, NA), treatment_id = c("25de9556-787c-5354-a9d4-b1f7d9db87d0", "4f92578b-39e8-55d9-b949-6ff1a90369d0"), submitter_id = c("TCGA-G4-6628_treatment_1", "TCGA-G4-6628_treatment"), treatment_type = c("Pharmaceutical Therapy, NOS", "Radiation Therapy, NOS"), regimen_or_line_of_therapy = c(NA, NA), treatment_effect = c(NA, NA), thera…	not reported	Cecum	2424	28772	Adenocarcinoma, NOS	yes	2006	No	6th	T2	1940-03-01	N0	M0	not reported	844dca75-87ad-5020-92ac-ab1882d3f1d7	C18.0	Cecum	Not Reported	not reported	Not Reported	677410cd-a001-57e0-b841-6548b495fd5b	white
TCGA-G4-6321-01A-11R-1723-07	TCGA-G4-6321	TCGA-G4-6321-01A	TP	Primary solid Tumor	TCGA-G4-6321-01A	1	Primary	cc8bda91-9a72-47dd-97c6-ca5e09fca229	TCGA-G4-6321	Primary Tumor	NA	Solid Tissue	released	FALSE	Tumor	Unknown	Not Reported	NA	NA	1	9bd063bf-9893-40c8-8c56-0493a760e439	0.4	1	Not Reported	Stage III	0	list(treatment_intent_type = c(NA, NA), updated_datetime = c("2019-07-31T18:39:37.561873-05:00", "2019-07-31T18:39:37.561873-05:00"), treatment_id = c("28112b51-aa1c-591d-9fe4-7a113bf181e0", "94545279-dc82-5fb6-b901-7d0795ea6958"), submitter_id = c("TCGA-G4-6321_treatment", "TCGA-G4-6321_treatment_1"), treatment_type = c("Radiation Therapy, NOS", "Pharmaceutical Therapy, NOS"), state = c("release…	not reported	Cecum	672	21921	Adenocarcinoma, NOS	yes	2009	No	6th	T2	1940-03-01	N1	MX	not reported	a2bfb093-e2f4-5759-b1a1-5e03c116efc1	C18.0	Cecum	Not Reported	not reported	Not Reported	6625ad6f-e1ff-5cf3-9a7c-ab0cb0081a00	white
TCGA-AA-3521-01A-01R-0821-07	TCGA-AA-3521	TCGA-AA-3521-01A	TP	Primary solid Tumor	TCGA-AA-3521-01A	1	Primary	cea58113-36e8-474f-89a5-604ff5188a92	TCGA-AA-3521	Primary Tumor	NA	Solid Tissue	released	FALSE	Tumor	Unknown	Not Reported	NA	NA	0.4	c3b59aea-87dd-4434-b915-8cf262eca259	0.4	1.1	Not Reported	Stage II	0	list(treatment_intent_type = c(NA, NA), updated_datetime = c("2019-07-31T18:34:32.590059-05:00", "2019-07-31T18:34:32.590059-05:00"), treatment_id = c("0a949d3f-fef3-545a-8358-dfa078ea6843", "eaadd834-b435-55fc-9017-732f6ec5ae53"), submitter_id = c("TCGA-AA-3521_treatment", "TCGA-AA-3521_treatment_1"), treatment_type = c("Radiation Therapy, NOS", "Pharmaceutical Therapy, NOS"), state = c("release…	not reported	Sigmoid colon	NA	31805	Adenocarcinoma, NOS	yes	2007	No	5th	T3	1940-03-01	N0	M0	not reported	e946ce54-94a8-5339-a4d2-d88882a3a164	C18.7	Sigmoid colon	Not Reported	not reported	Not Reported	9d14884c-2adf-5d7a-a82e-0a60cf39cf37	not reported
TCGA-AD-6964-01A-11R-1928-07	TCGA-AD-6964	TCGA-AD-6964-01A	TP	Primary solid Tumor	TCGA-AD-6964-01A	1	Primary	4d16e41a-b100-4080-a759-1f62e54c1c91	TCGA-AD-6964	Primary Tumor	NA	Solid Tissue	released	FALSE	Tumor	Unknown	Not Reported	NA	NA	0.4	e44f0cf3-e315-4305-9a95-dd8bc9ce7496	0.2	0.4	Not Reported	NA	0	list(days_to_treatment_end = c(NA, NA), days_to_treatment_start = c(NA, NA), treatment_id = c("68371f74-0021-524e-a8a6-154b33166705", "79ede20e-e550-5c4f-9835-924b13dda327"), submitter_id = c("TCGA-AD-6964_treatment_1", "TCGA-AD-6964_treatment"), treatment_type = c("Pharmaceutical Therapy, NOS", "Radiation Therapy, NOS"), regimen_or_line_of_therapy = c(NA, NA), treatment_effect = c(NA, NA), thera…	not reported	Ascending colon	23	21457	Adenocarcinoma, NOS	yes	2011	No	7th	T4a	1940-03-01	N2b	NA	not reported	96ad3274-0170-5005-bccb-091022c50b91	C18.2	Cecum	Not Reported	not reported	Not Reported	61a81e0a-1f2f-550a-b62f-2cadf9ffce4d	white
TCGA-AZ-6601-01A-11R-1774-07	TCGA-AZ-6601	TCGA-AZ-6601-01A	TP	Primary solid Tumor	TCGA-AZ-6601-01A	1	Primary	dc23bafb-2cfb-4c1b-9e66-b9cab22ae855	TCGA-AZ-6601	Primary Tumor	NA	Solid Tissue	released	FALSE	Tumor	Unknown	Not Reported	NA	NA	1.4	9f0f7a16-acd5-46cc-9f83-b9f165380ca9	0.6	1.7	Not Reported	Stage II	0	list(days_to_treatment_end = c(NA, NA), days_to_treatment_start = c(NA, NA), treatment_id = c("862cb7c5-bbbb-5cd9-8bf8-cb67d190e399", "d58ea798-b0da-5e7f-aa5c-3b00f2b3d65e"), submitter_id = c("TCGA-AZ-6601_treatment_1", "TCGA-AZ-6601_treatment"), treatment_type = c("Pharmaceutical Therapy, NOS", "Radiation Therapy, NOS"), regimen_or_line_of_therapy = c(NA, NA), treatment_effect = c(NA, NA), thera…	not reported	Sigmoid colon	NA	25082	Adenocarcinoma, NOS	yes	2001	No	5th	T3	1940-03-01	N0	M0	not reported	c84584a8-1d17-50ac-a3e1-1051e2889a4d	C18.7	Sigmoid colon	Not Reported	not reported	Not Reported	1a4802ef-9a41-50b8-ad6c-4bc46941524c	white
TCGA-AA-3511-11A-01R-1839-07	TCGA-AA-3511	TCGA-AA-3511-11A	NT	Solid Tissue Normal	TCGA-AA-3511-11A	11	Not Applicable	b0a269f6-ecea-4239-89f6-e9128d76ccb0	TCGA-AA-3511	Solid Tissue Normal	NA	Solid Tissue	released	FALSE	Normal	Unknown	Not Reported	NA	NA	0.7	NA	0.1	0.7	No	Stage II	0	list(treatment_intent_type = c(NA, NA), updated_datetime = c("2019-07-31T18:32:46.532835-05:00", "2019-07-31T18:32:46.532835-05:00"), treatment_id = c("4890c558-6f77-5621-8aa7-74e1086952e2", "da8a0947-294a-5da3-a15b-7981e257be8d"), submitter_id = c("TCGA-AA-3511_treatment", "TCGA-AA-3511_treatment_1"), treatment_type = c("Radiation Therapy, NOS", "Pharmaceutical Therapy, NOS"), state = c("release…	not reported	Colon, NOS	212	23407	Adenocarcinoma, NOS	no	2005	No	5th	T4	1940-03-01	N0	M0	not reported	fe16d423-c653-5727-9c35-2f686e12a06a	C18.9	Colon, NOS	Not Reported	not reported	Not Reported	f5d87b0e-ecbb-53f2-87c5-4045f41dc75a	not reported
TCGA-AA-3842-01A-01R-1022-07	TCGA-AA-3842	TCGA-AA-3842-01A	TP	Primary solid Tumor	TCGA-AA-3842-01A	1	Primary	11890703-2c2f-4663-aa57-cc9ff6504284	TCGA-AA-3842	Primary Tumor	NA	Solid Tissue	released	FALSE	Tumor	Unknown	Not Reported	NA	NA	0.6	890ecc56-472a-4b9b-8513-14c3d7fbd0d7	0.3	0.8	No	Stage IIIA	0	list(treatment_intent_type = c(NA, NA), updated_datetime = c("2019-07-31T18:31:27.627489-05:00", "2019-07-31T18:31:27.627489-05:00"), treatment_id = c("98e7cd13-d717-5200-a52f-2aca81dbfe2d", "ade47b8b-cd34-576a-83cb-8ad71f7f163d"), submitter_id = c("TCGA-AA-3842_treatment", "TCGA-AA-3842_treatment_1"), treatment_type = c("Radiation Therapy, NOS", "Pharmaceutical Therapy, NOS"), state = c("release…	not reported	Colon, NOS	1126	18842	Adenocarcinoma, NOS	no	2009	No	6th	T2	1940-03-01	N1	M0	not reported	d4340b2b-6950-5e12-b1b3-313b868150d9	C18.9	Colon, NOS	Not Reported	not reported	Not Reported	93a1c899-adc5-5c64-8aab-d491acbc4d12	not reported
TCGA-CM-5863-01A-21R-1839-07	TCGA-CM-5863	TCGA-CM-5863-01A	TP	Primary solid Tumor	TCGA-CM-5863-01A	1	Primary	8fa7105d-aba3-49e4-bbc0-083c547f3449	TCGA-CM-5863	Primary Tumor	NA	Solid Tissue	released	FALSE	Tumor	Unknown	Not Reported	NA	NA	1	1441ea9a-3fe4-4ee3-b22d-d73bb53ea399	0.5	2	No	Stage IIIB	0	list(treatment_intent_type = c(NA, NA), updated_datetime = c("2019-07-31T18:37:25.394451-05:00", "2019-07-31T18:37:25.394451-05:00"), treatment_id = c("b42b53bc-441c-5382-aad5-ee7f0b5fe456", "b437f4b5-7f84-5911-b29b-9ce89ce947d6"), submitter_id = c("TCGA-CM-5863_treatment", "TCGA-CM-5863_treatment_1"), treatment_type = c("Radiation Therapy, NOS", "Pharmaceutical Therapy, NOS"), state = c("release…	not reported	Ascending colon	457	22127	Mucinous adenocarcinoma	no	2010	No	7th	T3	1980-03-01	N1b	M0	not reported	fdd1b003-3414-5cc1-80b0-f0d44f82bf3e	C18.2	Ascending colon	Not Reported	not reported	Not Reported	1aa50a5c-70bf-5c1b-a12f-2dfb1f91aca7	white
TCGA-AA-3556-01A-01R-0821-07	TCGA-AA-3556	TCGA-AA-3556-01A	TP	Primary solid Tumor	TCGA-AA-3556-01A	1	Primary	4794413c-ed92-451c-a3ce-f411fed5ca82	TCGA-AA-3556	Primary Tumor	NA	Solid Tissue	released	FALSE	Tumor	Unknown	Not Reported	NA	NA	0.7	2da209db-a863-41a2-b387-265857a2dce6	0.3	0.7	Not Reported	Stage I	0	list(days_to_treatment_end = c(NA, NA), days_to_treatment_start = c(NA, NA), treatment_id = c("1b22b353-4a28-5640-8969-56ee8c4213d0", "cf9c33ad-a8bc-588f-b058-6ca313d6d4a1"), submitter_id = c("TCGA-AA-3556_treatment_1", "TCGA-AA-3556_treatment"), treatment_type = c("Pharmaceutical Therapy, NOS", "Radiation Therapy, NOS"), regimen_or_line_of_therapy = c(NA, NA), treatment_effect = c(NA, NA), thera…	not reported	Sigmoid colon	700	28704	Mucinous adenocarcinoma	yes	2008	No	6th	T2	1980-03-01	N0	M0	not reported	edf50138-dc58-51a3-a0c6-b7b878e850a0	C18.7	Sigmoid colon	Not Reported	not reported	Not Reported	a04712cd-50c6-5b75-bf7a-62964e4b1869	not reported
TCGA-NH-A5IV-01A-42R-A37K-07	TCGA-NH-A5IV	TCGA-NH-A5IV-01A	TP	Primary solid Tumor	TCGA-NH-A5IV-01A	1	Primary	cd591147-3d00-4f87-bd90-53dd9ff830f7	TCGA-NH-A5IV	Primary Tumor	FALSE	Solid Tissue	released	FALSE	Tumor	Unknown	Not Reported	77	850	NA	F7280EE2-0A62-4DE5-8A20-17B6FBB51F41	NA	NA	No	Stage IIA	0	list(days_to_treatment_end = c(NA, NA), days_to_treatment_start = c(NA, NA), treatment_id = c("239863ba-594e-5012-b438-5dd62e85d72e", "2ea5dafb-1283-5542-a189-a352812feaac"), submitter_id = c("TCGA-NH-A5IV_treatment_1", "TCGA-NH-A5IV_treatment"), treatment_type = c("Pharmaceutical Therapy, NOS", "Radiation Therapy, NOS"), regimen_or_line_of_therapy = c(NA, NA), treatment_effect = c(NA, NA), thera…	not reported	Transverse colon	0	32872	Adenocarcinoma, NOS	no	2012	No	7th	T3	1940-03-01	N0	MX	not reported	9ad56fce-723f-566a-bcab-512921b1e38f	C18.4	Transverse colon	Not Reported	not reported	Not Reported	f25ab36d-9b3e-5fb3-81b3-5e5009639c27	black or african american
TCGA-AA-A03F-01A-11R-A16W-07	TCGA-AA-A03F	TCGA-AA-A03F-01A	TP	Primary solid Tumor	TCGA-AA-A03F-01A	1	Primary	8aba8350-b5ee-4ca2-bc99-5c7922a886c4	TCGA-AA-A03F	Primary Tumor	FALSE	Solid Tissue	released	FALSE	Tumor	Unknown	Not Reported	2164	380	NA	F373544C-93EA-40F2-9C69-1FBCE4EB31E4	NA	NA	No	Stage III	0	list(treatment_intent_type = c(NA, NA), updated_datetime = c("2019-07-31T18:25:46.701345-05:00", "2019-07-31T18:25:46.701345-05:00"), treatment_id = c("6b0f5bc9-b025-53d5-b232-31c2eff5f4a8", "fa6e866d-019e-5e41-bd56-9c5a3eda01d2"), submitter_id = c("TCGA-AA-A03F_treatment", "TCGA-AA-A03F_treatment_1"), treatment_type = c("Radiation Therapy, NOS", "Pharmaceutical Therapy, NOS"), state = c("release…	not reported	Cecum	0	32872	Mucinous adenocarcinoma	no	2004	No	5th	T3	1980-03-01	N2	M0	not reported	f7927902-da63-5206-9c6e-1389e4977a3c	C18.0	Cecum	Not Reported	not reported	Not Reported	7c851237-0c29-57c8-a689-cd6a754fb481	not reported
TCGA-A6-2680-11A-01R-A32Z-07	TCGA-A6-2680	TCGA-A6-2680-11A	NT	Solid Tissue Normal	TCGA-A6-2680-11A	11	Not Applicable	169cf678-faf2-4090-823f-7052e0f76e47	TCGA-A6-2680	Solid Tissue Normal	NA	Solid Tissue	released	FALSE	Normal	Unknown	Not Reported	NA	NA	0.7	NA	0.6	1	No	Stage II	0	list(days_to_treatment_end = c(NA, NA), days_to_treatment_start = c(NA, NA), treatment_id = c("62d6934c-be96-5b08-bc40-7b5c7f853138", "85aac433-4c23-58e4-a50b-05725f4c5c6d"), submitter_id = c("TCGA-A6-2680_treatment_1", "TCGA-A6-2680_treatment"), treatment_type = c("Pharmaceutical Therapy, NOS", "Radiation Therapy, NOS"), regimen_or_line_of_therapy = c(NA, NA), treatment_effect = c(NA, NA), thera…	not reported	Hepatic flexure of colon	1068	26533	Adenocarcinoma, NOS	no	2009	No	6th	T3	1940-03-01	N0	M0	not reported	8e46e12f-5b24-5c3a-83a3-08449a01971e	C18.3	Hepatic flexure of colon	Not Reported	not reported	Not Reported	934a2072-7e68-5753-9d53-69f9424e1d7b	black or african american
TCGA-A6-2680-01A-01R-1410-07	TCGA-A6-2680	TCGA-A6-2680-01A	TP	Primary solid Tumor	TCGA-A6-2680-01A	1	Primary	d664f620-cfee-4700-b00e-68b65387883c	TCGA-A6-2680	Primary Tumor	NA	Solid Tissue	released	FALSE	Tumor	Unknown	Not Reported	NA	NA	0.6	f5ed27b7-f97a-40ec-9743-f5761f7ca1c6	0.5	1	No	Stage II	0	list(days_to_treatment_end = c(NA, NA), days_to_treatment_start = c(NA, NA), treatment_id = c("62d6934c-be96-5b08-bc40-7b5c7f853138", "85aac433-4c23-58e4-a50b-05725f4c5c6d"), submitter_id = c("TCGA-A6-2680_treatment_1", "TCGA-A6-2680_treatment"), treatment_type = c("Pharmaceutical Therapy, NOS", "Radiation Therapy, NOS"), regimen_or_line_of_therapy = c(NA, NA), treatment_effect = c(NA, NA), thera…	not reported	Hepatic flexure of colon	1068	26533	Adenocarcinoma, NOS	no	2009	No	6th	T3	1940-03-01	N0	M0	not reported	8e46e12f-5b24-5c3a-83a3-08449a01971e	C18.3	Hepatic flexure of colon	Not Reported	not reported	Not Reported	934a2072-7e68-5753-9d53-69f9424e1d7b	black or african american
[truncated: 107 more rows]
[truncated: 61 more columns]

## Sheet: GSEA enrichment results
Supplementary Table 2: The complete GSEA enrichment results.
ID	Description	setSize	enrichmentScore	NES	pvalue	p.adjust	qvalue	rank	leading_edge	core_enrichment
[truncated: 40 more rows]
